# Supplementary material for: Genetic variation in cervical preinvasive and invasive disease: a genome-wide association study
Source: PubMed Central journal article supplement (PMC8008734; doi:10.1016/s1470-2045(21)00028-0), 2021-04
Supplement: mmc1.pdf [file mmc1.pdf]

# THE LANCET Oncology

## Supplementary appendix

This appendix formed part of the original submission and has been peer reviewed.  
We post it as supplied by the authors.

Supplement to: Bowden SJ, Bodinier B, Kalliala I, et al. Genetic variation in cervical preinvasive and invasive disease: a genome-wide association study. *Lancet Oncol* 2021; **22**: 560–69.

## **CONTENTS**

- 1 SUPPLEMENTARY METHODS
  - 1.1 UK Biobank data
  - 1.2 FinnGen data
  - 1.3 Mendelian randomisation
  - 1.4 Bioinformatic packages and databases
- 2 FUNCTIONAL ANALYSIS
- 3 SUPPLEMENTARY TABLES
- 4 SUPPLEMENTARY FIGURES
- 5 FINNGEN CONSORTIUM AUTHOR LIST
- 6 REFERENCES

## **1 SUPPLEMENTARY METHODS**

### **1.1 UK Biobank (UKB) data**

An application (ID: 21146) was made to the UK Biobank on April 15th 2016, approved on September 22<sup>nd</sup> 2016; full genetic and phenotypic data were downloaded to the Imperial College high performance computer (HPC) network July 1st 2018.

The UK Biobank cohort is a prospective longitudinal cohort of ~500,000 volunteers aged 40-69 at enrolment ascertained in a clustering approach through NHS registers and recruited from 13/03/2006-1/10/2010<sup>1</sup>. Participants who consented to enrolment in the study were asked to attend for a baseline interview with a registered nurse and required to complete a standardised questionnaire with characteristics, life course exposures, medical history, treatments and family history. They consented to lifelong linkage to health data including cancer registries and Hospital Episode Statistics and cause of death data. Patients also underwent standardised anthropometric physical measurements such as BMI and blood pressure at enrolment and donated urine and serum plasma.

Serum plasma was genotyped using specifically designed UK Biobank and UK BiLEVE genotyping arrays, which share 95% variant content<sup>2</sup>. Imputation was undertaken centrally by the UKB in a merging of three reference panels, namely the UK10K, 1000 genomes Phase 3 panel and the Haplotype reference consortium (HRC)<sup>3</sup>. This resulted in ~9million SNPS with a minor allele frequency (MAF) >1% available for GWAS. Unexpected duplicates were later removed in R v4.02.

### **Definition of the Phenotype**

Cases and controls were identified from the UKB release for our project, which was coded in a series of fields as listed in supplement table 1. To identify cases, we used ICD9 and 10 codes (supplement table 2) for cervical cancer and carcinoma in situ, and searched UKB fields linking to UK cancer registries and hospital episode statistics (HES). To define controls, we identified women who were not cases but also with no history of any cervical abnormality, including mild or moderate dysplasia according to participant UKB questionnaires, UKB interviews, and HES.

### **Quality control**

Several Quality Control (QC) steps were undertaken centrally by UKB prior to data release including examination for deviation from Hardy-Weinberg Equilibrium (HWE), batch and plate effects, sex effects, array effects and sex chromosome discordance across control replicates. These SNPS were set to missing for the corresponding batch in the genetic data files provided by UKB. Samples were tested for heterozygosity and missing rates resulting in genotyping data for 488,377 individuals after QC. We removed all individuals with high missingness, sex discordance or high heterozygosity for autosomal

chromosomes. We excluded women that withdrew consent. Further information on the full QC performed by the UKB are available<sup>3,4</sup>.

### **Analysis Model**

We restricted the main analysis to European ancestry, based on genetic ancestry provided by UK Biobank (field 22006 available from the UK Biobank showcase at <https://www.ukbiobank.ac.uk/data-showcase>). A high degree of relatedness has been noted in the UK Biobank population and therefore to reduce confounding we excluded related individuals. We used a graph representation of the kinship between participants to define a set of unrelated individuals, as described elsewhere<sup>3</sup>. In this graph, women participants retained for analysis are the vertices and there is an edge between them if they are 3<sup>rd</sup> degree relatives or closer. Families correspond to connected components, i.e. sets of nodes that are inter-connected but isolated from the rest of the graph. For each family, we used the algorithm implemented in the igraph package in R to identify the largest set of unrelated individuals<sup>5</sup>, i.e. vertices that are not connected to any other vertex. These sets are combined to form the largest possible set of unrelated participants in the population under study. To adjust for covert relatedness we adjusted for ten principle components.

### **1.2 FinnGen release 5 (r5) data**

Replication was performed in the FinnGen r5, through application to the FinnGen team. Patients and control subjects in FinnGen provided informed consent for biobank research, based on the Finnish Biobank Act. Alternatively, older research cohorts, collected prior the start of FinnGen (in August 2017), were collected based on study-specific consents and later transferred to the Finnish biobanks after approval by Fimea, the National Supervisory Authority for Welfare and Health. Recruitment protocols followed the biobank protocols approved by Fimea. The Coordinating Ethics Committee of the Hospital District of Helsinki and Uusimaa (HUS) approved the FinnGen study protocol Nr HUS/990/2017.

The Biobank Access Decisions for FinnGen samples and data utilized in FinnGen Data Freeze 5 include: THL Biobank BB2017\_55, BB2017\_111, BB2018\_19, BB\_2018\_34, BB\_2018\_67, BB2018\_71, BB2019\_7, BB2019\_8, BB2019\_26, Finnish Red Cross Blood Service Biobank 7.12.2017, Helsinki Biobank HUS/359/2017, Auria Biobank AB17-5154, Biobank Borealis of Northern Finland\_2017\_1013, Biobank of Eastern Finland 1186/2018, Finnish Clinical Biobank Tampere MH0004, Central Finland Biobank 1-2017, and Terveystalo Biobank STB 2018001.

Genotyping was performed for ~600,000 samples on the FinnGen ThermoFisher Axiom custom array through the ThermoFisher genotyping service in San Diego. The array consists of 736,145 probes for 655,973 markers. In addition to the core GWAS markers it contains 116,402 coding markers enriched in Finland, specific markers for the HLA region, ClinVar markers, pharmacogenomic markers and

selected markers that were of special interest for partners. Legacy samples from other biobanks have previously been genotyped over the years using various generations of Illumina GWAS arrays. All GWAS data is imputed against a Finnish population specific whole genome sequence (WGS) backbone. More details can be found at: <https://www.finnngen.fi/en/researchers/genotyping>. Cervical cancer phenotypes cases were identified from Finnish Hospital Discharge register, Finnish Cancer Registry, and Cause of Death registry according to ICD10, ICD9 and ICD8 codes: “cervical dysplasia”, including cases of CIN 1-3 (ICD10: N87.0-9; ICD8: 621), “cervical carcinoma in situ”, including both endo- and ectocervical carcinoma in situ / CIN3 cases (ICD-10: D06), and malignant neoplasm of the uterine cervix (ICD10: C53; ICD9 & ICD8: 180). CIN3 cases are in Finland invariably coded either as D06 or N87.2, but most of CIN3 cases can be assumed to be included in the “cervical dysplasia” phenotype ([https://risteys.finnngen.fi/phenocode/N14\\_DYSPLACERVUT#endpoint-definition](https://risteys.finnngen.fi/phenocode/N14_DYSPLACERVUT#endpoint-definition)). All other women were included as controls. Covariates such as smoking and social deprivation score were not available.

| <b>FinnGen Phenotype</b>                               | <b>Cases/Controls</b> |
|--------------------------------------------------------|-----------------------|
| Malignant neoplasm of cervix uteri (ICC)               | 1648/121931           |
| Carcinoma in situ of cervix uteri (CIN3)               | 298/123281            |
| Dysplasia of cervix uteri (cervical dysplasia CIN1-3)* | 4246/68969            |

\* The cervical dysplasia phenotype in FinnGen is based on data from both the Cause of Death and Hospital Discharge Registry (HDR) data. HDR records includes information on inpatient episodes since 1967, day surgical procedures in all hospitals since 1994 and all hospital outpatient visits in public hospitals since 1998. HDR data can therefore include CIN1 cases as well as histological high-grade squamous intraepithelial lesions (HSIL) cases. However, since the majority of treatments are for HSIL (CIN2 or more), the phenotype here will consist mainly of high-grade disease (estimated to be greater than two-thirds of cases). The number of women contributed from the death registry can be considered minimal. In summary, the FinnGen “cervical dysplasia”, phenotype mainly consists of CIN3 (dysplasia gravis, carcinoma in situ), but does include some CIN1-2.

### 1.3 Mendelian randomisation

*Systematic review:* We performed a systematic review of the literature and identified the following search strategy to identify publications on risk and protective factors associated with cervical cancer phenotypes, the full details are published at PROSPERO [ID:189995]. The search strategy used to identify meta-analyses and pooled studies was as follows:

1. Uterine Cervical Neoplasms [MeSH Terms] OR Uterine Cervical Dysplasia [MeSH Terms] OR female genital tract cancer OR uterine cervix cancer OR Cervical Intraepithelial Neoplasia [MeSH Terms] OR CIN [tw] OR CINII\* [tw] OR CIN2\* [tw] OR CINIII\* [tw] OR CIN3\* [tw] OR SIL [tw] OR HSIL [tw] OR H-SIL [tw] OR LSIL [tw] OR L-SIL [tw] OR ASCUS [tw] OR AS-CUS [tw] OR (papillomaviridae [MeSH:NoExp] OR alphapapillomavirus [MeSH Terms] OR "DNA, viral" [MeSH Terms] OR Papillomavirus Infections [MeSH Terms] OR Tumor Virus Infections [MeSH Terms] OR "Cervix Uteri/virology" [MeSH Terms] OR HPV [tw] OR "human papillomavirus" [tw] OR papillomaviridae [tw])

2. (cervix[Tw] OR cervical[Tw] OR cervico\*[Tw] OR Cerv\*[tw]) AND (cancer\*[Tw] OR carcinoma[Tw] OR adenocarcinoma[Tw] OR neoplas\*[Tw] OR dysplas\*[tw] OR dyskaryos\*[Tw] OR squamous[Tw])
3. (female genital tract cancer[tw])
4. 2 OR 3
5. 1 OR 4
6. Meta-analysis[pt] OR systematic[sb] OR (Meta-analysis[tw] OR systematic review[tw] OR meta-analysis as topic[mh] OR meta-analysis[mh] OR meta analy\*[tw] OR metanaly\*[tw] OR metaanaly\*[tw] OR met analy\*[tw] OR systematic review\*[tiab])
7. 5 AND 6
8. animal[mh] NOT human[mh]
9. 7 NOT 8

*Analysis Model:* For the main analysis we used a two-sample mendelian randomisation approach, we quantify the linear contribution of these instruments to the genetically-predicted risk of cervical cancer, as measured by log-OR, using inverse variance weighting to estimate effect size expressed as OR and 95%CI. For exposures with significant effects in the main IVW MR analysis (multiple testing adjusted for using Benjamini and Hochberg's correction controlling the false discovery rate below 5%), we performed sensitivity analyses using a range of robust MR approaches to circumvent possible violations of the instrumental variable assumptions (weighted median<sup>6</sup> and MR Presso<sup>7</sup>). We subsequently performed two multivariable MR<sup>8</sup> models to account for potential pleiotropy and attenuation. First, we investigated whether age of first pregnancy effect attenuates when accounting for number of sexual partners, using the 10 genetic variants associated with age at first pregnancy<sup>9</sup>. Secondly, we performed a multivariable MR analysis for risky behaviours, where we include the lifetime smoking index<sup>10</sup> and number of sexual partners<sup>11</sup>.

### **1.3 Bioinformatic packages and databases**

PLINK v1.9b3.3<sup>12</sup>.

GWAS Catalog [accessed 2020-05-20]<sup>13</sup>

Phenoscaner<sup>14</sup>

UCSC genome browser<sup>15</sup>

dbSNP<sup>16</sup>

ENCODE<sup>17</sup>

PanCanQTL database<sup>18</sup>

GTEX Portal<sup>19</sup>

COSMIC<sup>20</sup>

HaploReg v4.1<sup>21</sup>

## 2 Functional Annotation

The strongest association on chromosome 2 was an INDEL (rs35724515), which was tagged to rs10175462 (LD  $r^2=1$ , distance 4.3 kb). When investigating the eQTL we detected that the whole region showed allele-specific long-range epigenetic silencing in cervical cancer tissues (Supplementary Figure 4). Meanwhile examination of gene expression in healthy tissues suggested *PAX8* has a limited expression across tissue types and is mostly limited to cervix, thyroid and kidney tissues. For this locus, histone marks were also noted in HeLa (cervical cancer) cell lines, suggesting the SNP may have regulatory effects. Interrogation of the GWAS catalog revealed this SNP has been previously associated with a phenotype of reduced lymphocyte counts<sup>22</sup>. This SNP has not previously been associated with cervical or any other cancers, however increased *PAX8* gene expression has been associated with the mucinous ovarian cancer trait<sup>23</sup> and in epithelial ovarian cancer tumour tissue<sup>24</sup>. Overall there appears to be evidence of a regulatory function of this locus in predisposition to altered immune or carcinogenic pathways.

Annotation of rs27069 revealed an intergenic variant located 2029bp downstream from the *CLPTMIL* (also known as cisplatin-resistance gene), commonly co-expressed with the *TERT* gene. This SNP had a reported co-localised eQTL locus in oesophageal mucosal tissue and skin in GTEx however, no data were available for cervical tissue. HaploReg reported this SNP as motif-altering for YY1, a transcription factor which has been reported to be correlated with expression of the HPV16 oncogene E6 and progression from CIN to cancer<sup>25</sup>. Previous SNP associations have been reported for this gene and HPV-driven plantar warts<sup>26</sup>, as well as oral cavity<sup>27</sup> and nasopharyngeal<sup>28</sup> cancers – a significant proportion of which are HPV-driven. Sequence variation at the *TERT-CLPTMIL* locus has been previously associated with cervical cancer as well as other squamous and adeno-carcinoma types including skin and lung cancers<sup>29</sup>.

We detected *HLA* associations including protective and risk variants in proximity of *HLA-DRB1*, *HLA-DQAI* and *MICA* genes. The protective association observed at rs9266183 in the *HLA-B* region (6p21.3) has not previously been associated to cervical cancer, and according to the dbSNP reference report, is a predicted missense variant located in the *MHC Class I* gene; this causes an amino acid change from Aspartate to Glycine. Upstream (3'UTR) from the variant is a co-localised microRNA (MIR6891), which has been reported to affect local RNA stability including transcripts for the IgA heavy chain<sup>30</sup>. Cervical mucosal IgA responses to HPV are recognised to be important in preventing infection, re-infection, spread to adjacent cells and HPV clearance<sup>31</sup>.

### **3 SUPPLEMENTARY TABLES**



**Supplement Table 1.** Individual characteristics of the 150,314 unrelated UK Biobank participants of European ancestry in main analysis

|                             | <b>Controls</b><br>(N=145,545) |                          | <b>CIN3 cases</b><br>(N=4,005) |                          | <b>ICC cases</b><br>(N=764) |                           |
|-----------------------------|--------------------------------|--------------------------|--------------------------------|--------------------------|-----------------------------|---------------------------|
|                             | n                              | Median (IQR)/ Proportion | n                              | Median (IQR)/ Proportion | n                           | Median (IQR) / Proportion |
| Age at recruitment          | 145,545                        | 57 (13)                  | 4,005                          | 53 (12)                  | 764                         | 57 (11)                   |
| Smoking status              |                                |                          |                                |                          |                             |                           |
| <i>Never</i>                | 88,213                         | 60.61                    | 1,729                          | 43.17                    | 348                         | 45.55                     |
| <i>Former</i>               | 45,214                         | 31.07                    | 1,505                          | 37.58                    | 287                         | 37.57                     |
| <i>Current</i>              | 12,118                         | 8.33                     | 771                            | 19.25                    | 129                         | 16.88                     |
| Townsend score <sup>+</sup> | 145,545                        | -2.37 (-3.75/-0.04)      | 4,005                          | -1.65 (-3.37/1.20)       | 764                         | -1.86 (-3.47/1.00)        |

**Supplement Table 2.** Individual characteristics of the 180,224 unrelated UK Biobank (UKB) participants of all ethnicities, as identified by UKB genotyping data

|                      | <b>Controls</b><br>(N=174,717)<br>n Mean (s.d.) / Proportion |               | <b>CIN3 cases</b><br>(N=4,620)<br>n Mean (s.d.) / Proportion |               | <b>Cancer cases</b><br>(N=887)<br>n Mean (s.d.) / Proportion |               |
|----------------------|--------------------------------------------------------------|---------------|--------------------------------------------------------------|---------------|--------------------------------------------------------------|---------------|
| Age at recruitment   | 174,717                                                      | 55.83 (8.00)  | 4,620                                                        | 53.05 (7.69)  | 887                                                          | 56.16 (7.26)  |
| Ethnic background    |                                                              |               |                                                              |               |                                                              |               |
| <i>European*</i>     | <b>145,545</b>                                               | <b>83.30%</b> | <b>4,005</b>                                                 | <b>86.69%</b> | <b>764</b>                                                   | <b>86.13%</b> |
| <i>White (Other)</i> | 19,987                                                       | 11.44%        | 487                                                          | 10.54%        | 99                                                           | 11.16%        |
| <i>Asian</i>         | 3,517                                                        | 2.01%         | 22                                                           | 0.48%         | 11                                                           | 1.24%         |
| <i>Black</i>         | 3,516                                                        | 2.01%         | 51                                                           | 1.10%         | 6                                                            | 0.68%         |
| <i>Mixed</i>         | 1,353                                                        | 0.77%         | 40                                                           | 0.87%         | 5                                                            | 0.56%         |
| <i>Chinese</i>       | 799                                                          | 0.46%         | 15                                                           | 0.32%         | 2                                                            | 0.23%         |
| Smoking status       |                                                              |               |                                                              |               |                                                              |               |
| <i>Never</i>         | 106,244                                                      | 60.81%        | 1,981                                                        | 42.88%        | 411                                                          | 46.34%        |
| <i>Former</i>        | 53,492                                                       | 30.62%        | 1,746                                                        | 37.79%        | 330                                                          | 37.20%        |
| <i>Current</i>       | 14,981                                                       | 8.57%         | 893                                                          | 19.33%        | 146                                                          | 16.46%        |
| Townsend score**     | 174,717                                                      | -1.38 (3.02)  | 4,620                                                        | -0.79 (3.17)  | 887                                                          | -0.91 (3.24)  |

\*Main analysis restricted to European ancestry as largest ethnic group

\*\*Townsend score is a relative deprivation index used to measure material deprivation based on four variables: unemployment, non-car ownership, non-home ownership, household overcrowding, where increasing score implies increased deprivation.

Abbreviations. n: number of participants with covariate trait, N: Total number of participants in disease phenotype; s.d: standard deviation.

Supplement Table 3. UKB fields requested and accessed to identify cases and controls and genetic quality control

| Full_name  | Pheno                                                                   |
|------------|-------------------------------------------------------------------------|
| X1239      | Current tobacco smoking                                                 |
| X20001     | Cancer code, self-reported                                              |
| X20006     | Interpolated Year when cancer first diagnosed                           |
| X20007     | Interpolated age of participant when cancer first diagnosed             |
| X20008     | Interpolated year when non-cancer illness first diagnosed               |
| X20009     | Interpolated Age of participant when non-cancer illness first diagnosed |
| X20010     | Interpolated year when operation took place                             |
| X20011     | Interpolated age of participant when operation took place               |
| X20012     | Method of recording time when cancer first diagnosed                    |
| X20013     | Method of recording time when non-cancer illness first diagnosed        |
| X20014.0.1 | Method of recording time when operation occurred                        |
| X20160     | Ever smoked                                                             |
| X21000     | Ethnic background                                                       |
| X21003     | Age when attendce assessment centre                                     |
| X21022     | Age at recruitment                                                      |
| X22001     | Genetic Sex                                                             |
| X22002     | CEL                                                                     |
| X22003     | Heterozygosity                                                          |
| X22004     | Heterozygosity, PCA corrected                                           |
| X22005     | Missingness                                                             |
| X22006     | Genetic ethnic grouping                                                 |
| X22007     | Genotype measurement plate                                              |
| X22008     | Genotype measurement well                                               |
| X22009.0.1 | Genetic principal components                                            |
| X22011     | Genetic relatedness pairing                                             |
| X22012     | Genetic relatedness factor                                              |
| X22013     | Genetic relatedness IBS0                                                |
| X22018     | Genetic relatedness exclusions                                          |
| X22021     | Genetic kinship to other participants                                   |
| X22100     | Chromosome XY genotype results                                          |
| X22101     | Chromosome 1 genotype results                                           |
| X22102     | Chromosome 2 genotype results                                           |
| X22103     | Chromosome 3 genotype results                                           |
| X22104     | Chromosome 4 genotype results                                           |
| X22105     | Chromosome 5 genotype results                                           |
| X22106     | Chromosome 6 genotype results                                           |
| X22107     | Chromosome 7 genotype results                                           |
| X22108     | Chromosome 8 genotype results                                           |
| X22109     | Chromosome 9 genotype results                                           |
| X22110     | Chromosome 10 genotype results                                          |
| X22111     | Chromosome 11 genotype results                                          |
| X22112     | Chromosome 12 genotype results                                          |
| X22113     | Chromosome 13 genotype results                                          |
| X22114     | Chromosome 14 genotype results                                          |
| X22115     | Chromosome 15 genotype results                                          |
| X22116     | Chromosome 16 genotype results                                          |
| X22117     | Chromosome 17 genotype results                                          |
| X22118     | Chromosome 18 genotype results                                          |
| X22119     | Chromosome 19 genotype results                                          |
| X22120     | Chromosome 20 genotype results                                          |
| X22121     | Chromosome 21 genotype results                                          |
| X22122     | Chromosome 22 genotype results                                          |
| X22123     | Chromosome X genotype results                                           |
| X22124     | Chromosome Y genotype results                                           |
| X22125     | Mitochondrial genotype results                                          |
| X22182     | HLA imputation values                                                   |
| X22801     | Chromosome 1 imputation and haplotype results                           |
| X22802     | Chromosome 2 imputation and haplotype results                           |
| X22803     | Chromosome 3 imputation and haplotype results                           |
| X22804     | Chromosome 4 imputation and haplotype results                           |
| X22805     | Chromosome 5 imputation and haplotype results                           |
| X22806     | Chromosome 6 imputation and haplotype results                           |
| X22807     | Chromosome 7 imputation and haplotype results                           |
| X22808     | Chromosome 8 imputation and haplotype results                           |
| X22809     | Chromosome 9 imputation and haplotype results                           |
| X22810     | Chromosome 10 imputation and haplotype results                          |
| X22811     | Chromosome 11 imputation and haplotype results                          |
| X22812     | Chromosome 12 imputation and haplotype results                          |
| X22813     | Chromosome 13 imputation and haplotype results                          |
| X22814     | Chromosome 14 imputation and haplotype results                          |
| X22815     | Chromosome 15 imputation and haplotype results                          |
| X22816     | Chromosome 16 imputation and haplotype results                          |
| X22817     | Chromosome 17 imputation and haplotype results                          |
| X22818     | Chromosome 18 imputation and haplotype results                          |
| X22819     | Chromosome 19 imputation and haplotype results                          |
| X22820     | Chromosome 20 imputation and haplotype results                          |
| X22821     | Chromosome 21 imputation and haplotype results                          |
| X22822     | Chromosome 22 imputation and haplotype results                          |
| X2453      | Cancer diagnosed by doctor                                              |
| X40000     | Date of death                                                           |
| X40002     | Contributory (secondary) causes of death                                |
| X40005     | Date of cancer diagnosis                                                |
| X40007     | Age at death                                                            |
| X40008     | Age at cancer diagnosis                                                 |
| X40011     | Histology of cancer tumour                                              |
| X40012     | Behaviour of cancer tumour                                              |
| X40018     | Death report format                                                     |
| X41078     | Episodes containing "Diagnoses - secondary ICD10" data                  |
| X41080     | Episodes containing "Operative procedures - secondary OPCS" data        |
| X41082     | Episodes containing "Dates of operations" data                          |
| X41083     | Episodes containing "episode start date" data                           |
| X41084     | Episodes containing "Episode end date" data                             |
| X41096     | Episodes containing "Date of admission to hospital" data                |
| X41101     | Episodes containing "Date of discharge from hospital" data              |
| X41142     | Episodes containing "Diagnoses - main ICD10" data                       |
| X41146     | Episodes containing "operative procedure - main OPCS" data              |
| X41148     | Episodes containing "Date of operation" data                            |
| X41202     | Diagnoses - main ICD10                                                  |
| X41203     | Diagnoses - main ICD9                                                   |
| X41204     | Diagnoses - secondary ICD10                                             |
| X41205     | Diagnoses - secondary ICD9                                              |
| X52        | Month of birth                                                          |
| X53        | Date attendance assessment centre                                       |
| X84        | Cancer year/age first occurred                                          |
| X22200     | Year of birth                                                           |
| X54        | UK biobank assessment centre                                            |
| X87        | Non-cancer illness year/age first occurred                              |
| X92        | Operation year/age first occurred                                       |
| X189       | Townsend deprivation index at recruitment                               |
| X1249      | Past tobacco smoking                                                    |
| X20002     | Non-cancer illness code, self reported                                  |
| X20004     | Operation code                                                          |
| X20116     | Smoking status                                                          |
| X22506     | Tobacco smoking                                                         |
| X40001     | Underlying (primary) cause of death                                     |
| X40006     | Type of cancer: ICD10                                                   |
| X40013     | Type of cancer: ICD9                                                    |
| X41273     | Operative procedures - main OPCS                                        |
| X41256     | Operative procedures - secondary OPCS                                   |

**Supplement Table 4.** ICD9 and 10 codes from UK Biobank field IDs 40006 (ICD10), 40013 (ICD9) and linkage to the Hospital Episode Statistics used to identify cases and exclude controls

| <b>Inclusion criteria for cases</b>                      |                                                                                         |              |                                       |
|----------------------------------------------------------|-----------------------------------------------------------------------------------------|--------------|---------------------------------------|
| <b>ICD9</b>                                              |                                                                                         | <b>ICD10</b> |                                       |
| 180.0                                                    | Malignant neoplasm of endocervix                                                        | C53          |                                       |
| 180.1                                                    | Malignant neoplasm of exocervix                                                         | C53.1        |                                       |
| 180.8                                                    | Malignant neoplasm of other specified sites of cervix<br>cervix uteri, unspecified site | C53.9        |                                       |
| 180.9                                                    | Carcinoma in situ (CIN3)                                                                | D06.0        | CIS endocervix CIS                    |
| 233.1                                                    |                                                                                         | D06.1        | ectocervix                            |
|                                                          |                                                                                         | D06.7        | CIS other parts of cervix CIS cervix, |
|                                                          |                                                                                         | D06.9        | unspecified                           |
| <b>Exclusion criteria for controls (plus not a case)</b> |                                                                                         |              |                                       |
| <b>ICD10</b>                                             |                                                                                         |              |                                       |
| N87.0                                                    | Mild dysplasia                                                                          |              |                                       |
| N87.1                                                    | Moderate dysplasia                                                                      |              |                                       |
| N87.2                                                    | Severe dysplasia                                                                        |              |                                       |

*Abbreviations: ICD9-10: International classification of diseases versions 9 and 10*

**Supplement Table 5.** Exposures identified for cervical cancer and submitted to search for GWAS in preparation for Mendelian randomisation analysis November 2020

| Exposure                                                                        | PMID                                |
|---------------------------------------------------------------------------------|-------------------------------------|
| 1. Combined oral contraceptive pill                                             | 12686037;28759170;17993361          |
| 2. Injectable contraceptives                                                    | 12686037                            |
| 3. Intrauterine device                                                          | 21917519;29112647                   |
| 4. Active smoking                                                               | 12854514;14682438                   |
| 5. Passive smoking                                                              | 22938442;27321059;16206285;24935346 |
| 6. Household air pollution                                                      | 25890249                            |
| 7. Chlamydia trachomatis infection                                              | 27043670;31175391                   |
| 8. Herpes simplex virus type 2                                                  | 25030659                            |
| 9. EBV infection                                                                | 29021084                            |
| 10. HIV and antiretroviral treatment                                            | 29107561;29369827                   |
| 11. HIV infection                                                               | 17617273;29369827;29873885;30602038 |
| 12. HIV, CD4 count                                                              | 29369827;29873885                   |
| 13. U.urealyticum infection                                                     | 29520664                            |
| 14. U.parvum infection                                                          | 29520664                            |
| 15. M.hominis infection                                                         | 29520664                            |
| 16. M.genitalium infection                                                      | 29520664                            |
| 17. Coinfection of HPV and C.trachomatis                                        | 27043670                            |
| 18. Vaginal dysbiosis                                                           | 30550767                            |
| 19. Bacterial vaginosis                                                         | 21223574                            |
| 20. Vaginal microbiota                                                          | 29729331;31242505                   |
| 21. Trichomonas vaginalis infection                                             | 9240115                             |
| 22. Vaginal douching                                                            | 9240115                             |
| 23. Human papillomavirus vaccine                                                | 29740819                            |
| 24. Age at full term pregnancy                                                  | 16570271                            |
| 25. Parity                                                                      | 16570271                            |
| 26. In vitro fertilisation treatment                                            | 23211423                            |
| 27. Number of sexual partners                                                   | 25987056                            |
| 28. Pregnancy                                                                   | 24667102                            |
| 29. Condom use                                                                  | 12438912                            |
| 30. Vit B12                                                                     | 15912536                            |
| 31. Vit C                                                                       | 26731169;15912536                   |
| 32. Vit E                                                                       | 28829815;15912536                   |
| 33. Vit A                                                                       | 22005522                            |
| 34. Folate levels                                                               | 15912536;21749626                   |
| 35. Homocysteine levels                                                         | 15912536                            |
| 36. Beta-carotene                                                               | 15912536                            |
| 37. Alpha carotene                                                              | 15912536                            |
| 38. Exposure to trichloroethylene                                               | 22005522                            |
| 39. Lycopene                                                                    | 15912536                            |
| 40. Lutein                                                                      | 15912536                            |
| 41. Cryptoxanthin                                                               | 15912536                            |
| 42. Retinol                                                                     | 15912536                            |
| 43. Alpha tocopherol                                                            | 15912536                            |
| 44. Intake of fruits                                                            | 15912536                            |
| 45. Intake of vegetables (carrots, pumpkin, papaya, spinach, broccoli, oranges) | 15912536                            |
| 46. Intake of juices                                                            | 15912536                            |
| 47. Carotenoids intake                                                          | 22005522                            |
| 48. Zinc levels                                                                 | 30370809                            |
| 49. Copper levels                                                               | 30370809                            |
| 50. Systemic lupus erythematosus                                                | 24657969                            |
| 51. Rheumatoid arthritis                                                        | 26271620                            |
| 52. Transplant recipient                                                        | 17617273                            |
| 53. Inflammatory bowel disease on immunosuppressive medication                  | 25895005                            |
| 54. Multiple sclerosis                                                          | 25533302                            |
| 55. Eating disorders                                                            | 33025526                            |
| 56. T2DM                                                                        | 32349989                            |
| 57. Maternal reproductive factors                                               | 32226046                            |
| 58. Fruits and vegetables                                                       | 32156167                            |
| 59. GDM                                                                         | 32097717                            |
| 60. Serum iron                                                                  | 31852398                            |
| 61. Candida albicans                                                            | 31673281                            |
| 62. BMI                                                                         | WCRF CUP database                   |

**Supplement Table 6.** GWAS studies identified as exposures available for MR analyses

| <b>Exposure</b>                                                                          | <b>N total</b>     |
|------------------------------------------------------------------------------------------|--------------------|
| Cigarette smoking including duration and heaviness and cessation                         | 462690 individuals |
| Reproductive behaviour in women as measured by age at first birth and number of children | 189656 women       |
| Number of sexual partners as part of a study on risky behaviour measured in individuals  | 414343 individuals |

**Supplement Table 7.** All SNPs reaching  $P < 5 \times 10^{-8}$  in the UKB discovery cohort for CIN3 or ICC phenotypes

| CHR | RSID                  | BP        | A<br>1 | TEST | NMISS  | OR     | STAT   | P        |
|-----|-----------------------|-----------|--------|------|--------|--------|--------|----------|
| 2   | rs28679654            | 113967617 | T      | ADD  | 145745 | 0.8622 | -5.769 | 7.97E-09 |
| 2   | rs112692022           | 113970182 | T      | ADD  | 147202 | 0.8623 | -5.794 | 6.88E-09 |
| 2   | rs7578633             | 113978650 | T      | ADD  | 148698 | 0.874  | -6.02  | 1.74E-09 |
| 2   | rs11123170            | 113978940 | G      | ADD  | 148783 | 0.8735 | -6.046 | 1.48E-09 |
| 2   | rs12472361            | 113980645 | G      | ADD  | 148533 | 0.8631 | -5.765 | 8.15E-09 |
| 2   | rs6707386             | 113981022 | A      | ADD  | 148719 | 0.8739 | -6.025 | 1.69E-09 |
| 2   | rs6755040             | 113981137 | C      | ADD  | 148718 | 0.8732 | -6.062 | 1.35E-09 |
| 2   | rs4849177             | 113982584 | C      | ADD  | 148716 | 0.8733 | -6.061 | 1.36E-09 |
| 2   | rs4849178             | 113982608 | A      | ADD  | 148644 | 0.8624 | -5.797 | 6.74E-09 |
| 2   | rs11123172            | 113984303 | C      | ADD  | 148724 | 0.8734 | -6.057 | 1.39E-09 |
| 2   | rs4849179             | 113985170 | T      | ADD  | 148714 | 0.8734 | -6.054 | 1.41E-09 |
| 2   | rs4849180             | 113985186 | G      | ADD  | 148657 | 0.8623 | -5.802 | 6.54E-09 |
| 2   | rs35222158            | 113986629 | T      | ADD  | 148665 | 0.8626 | -5.788 | 7.13E-09 |
| 2   | rs10175462            | 113988492 | A      | ADD  | 148783 | 0.8724 | -6.099 | 1.07E-09 |
| 2   | rs5833488             | 113989122 | A<br>G | ADD  | 148709 | 0.8727 | -6.088 | 1.15E-09 |
| 2   | rs2863242             | 113989236 | T      | ADD  | 148783 | 0.8619 | -5.822 | 5.82E-09 |
| 2   | rs2863243             | 113989267 | C      | ADD  | 148749 | 0.8729 | -6.082 | 1.19E-09 |
| 2   | rs7563094             | 113989327 | C      | ADD  | 148750 | 0.8729 | -6.081 | 1.19E-09 |
| 2   | rs2166421             | 113990242 | C      | ADD  | 148462 | 0.8628 | -5.774 | 7.76E-09 |
| 2   | rs7421852             | 113990261 | A      | ADD  | 148555 | 0.8746 | -5.992 | 2.08E-09 |
| 2   | rs10206269            | 113990393 | A      | ADD  | 148581 | 0.8745 | -5.993 | 2.06E-09 |
| 2   | rs4849181             | 113991970 | G      | ADD  | 148783 | 0.8747 | -5.984 | 2.18E-09 |
| 2   | rs4849182             | 113992201 | A      | ADD  | 148415 | 0.8632 | -5.755 | 8.67E-09 |
| 2   | 2:113992800_T<br>CC_T | 113992800 | T      | ADD  | 148130 | 0.8715 | -6.13  | 8.76E-10 |
| 2   | rs7576384             | 113993385 | G      | ADD  | 145311 | 0.8767 | -5.814 | 6.08E-09 |
| 5   | rs27069               | 1347128   | T      | ADD  | 145041 | 0.8781 | -5.961 | 2.51E-09 |
| 6   | rs114115115           | 30989692  | G      | ADD  | 147978 | 0.7514 | -5.741 | 9.42E-09 |
| 6   | rs116071718           | 30990081  | A      | ADD  | 147972 | 0.7573 | -5.747 | 9.06E-09 |
| 6   | rs3094672             | 30993377  | T      | ADD  | 148783 | 1.161  | 6.442  | 1.18E-10 |
| 6   | rs3130519             | 31195097  | T      | ADD  | 148669 | 1.155  | 6.39   | 1.65E-10 |
| 6   | rs3130947             | 31195365  | G      | ADD  | 148766 | 1.151  | 6.192  | 5.95E-10 |
| 6   | rs9264023             | 31195796  | A      | ADD  | 148761 | 1.151  | 6.196  | 5.78E-10 |
| 6   | rs3130469             | 31196336  | T      | ADD  | 148773 | 1.151  | 6.191  | 5.96E-10 |
| 6   | rs3130472             | 31198205  | G      | ADD  | 148778 | 1.15   | 6.189  | 6.06E-10 |
| 6   | rs3130939             | 31198507  | A      | ADD  | 148779 | 1.151  | 6.189  | 6.05E-10 |

|   |            |          |   |     |        |        |        |          |
|---|------------|----------|---|-----|--------|--------|--------|----------|
| 6 | rs3130527  | 31198987 | T | ADD | 148783 | 1.15   | 6.176  | 6.59E-10 |
| 6 | rs3132532  | 31201202 | A | ADD | 148708 | 1.145  | 5.953  | 2.64E-09 |
| 6 | rs2394888  | 31202246 | A | ADD | 148708 | 1.145  | 5.953  | 2.64E-09 |
| 6 | rs2394889  | 31202305 | C | ADD | 148706 | 1.145  | 5.954  | 2.61E-09 |
| 6 | rs3130701  | 31202686 | C | ADD | 148709 | 1.145  | 5.952  | 2.64E-09 |
| 6 | rs3134770  | 31204986 | T | ADD | 148751 | 1.146  | 5.974  | 2.32E-09 |
| 6 | rs9265189  | 31289588 | A | ADD | 148198 | 1.141  | 5.941  | 2.84E-09 |
| 6 | rs9265258  | 31291276 | G | ADD | 146279 | 1.141  | 5.911  | 3.40E-09 |
| 6 | rs9265459  | 31296680 | A | ADD | 148534 | 1.142  | 5.976  | 2.28E-09 |
| 6 | rs9265572  | 31298681 | G | ADD | 147373 | 1.141  | 5.902  | 3.60E-09 |
| 6 | rs9265597  | 31299280 | T | ADD | 142946 | 1.141  | 5.869  | 4.38E-09 |
| 6 | rs9265658  | 31300571 | T | ADD | 148758 | 1.14   | 5.928  | 3.08E-09 |
| 6 | rs9265683  | 31301240 | C | ADD | 148743 | 1.141  | 5.96   | 2.52E-09 |
| 6 | rs9265729  | 31302236 | T | ADD | 148543 | 1.139  | 5.911  | 3.40E-09 |
| 6 | rs4959060  | 31304535 | A | ADD | 146123 | 1.168  | 5.76   | 8.41E-09 |
| 6 | rs9295981  | 31308524 | A | ADD | 129045 | 0.8633 | -6.055 | 1.40E-09 |
| 6 | rs4637682  | 31312237 | A | ADD | 148679 | 0.8749 | -5.775 | 7.71E-09 |
| 6 | rs2508002  | 31312863 | C | ADD | 147158 | 0.8648 | -6.784 | 1.17E-11 |
| 6 | rs12175330 | 31314066 | T | ADD | 148358 | 0.8766 | -5.778 | 7.58E-09 |
| 6 | rs3016018  | 31314106 | G | ADD | 148654 | 0.8648 | -6.849 | 7.43E-12 |
| 6 | rs2507999  | 31314646 | A | ADD | 148695 | 1.14   | 5.924  | 3.14E-09 |
| 6 | rs2507996  | 31314921 | A | ADD | 148706 | 1.136  | 5.824  | 5.75E-09 |
| 6 | rs9265951  | 31315270 | C | ADD | 148349 | 1.137  | 6.087  | 1.15E-09 |
| 6 | rs9265953  | 31315312 | A | ADD | 146780 | 1.139  | 6.132  | 8.70E-10 |
| 6 | rs9265956  | 31315363 | T | ADD | 148056 | 1.14   | 5.929  | 3.04E-09 |
| 6 | rs9265962  | 31315520 | A | ADD | 148607 | 1.136  | 5.851  | 4.90E-09 |
| 6 | rs9265975  | 31315891 | A | ADD | 148505 | 1.183  | 7.686  | 1.51E-14 |
| 6 | rs1053726  | 31322047 | G | ADD | 148349 | 0.797  | -6.523 | 6.89E-11 |
| 6 | rs3819306  | 31322133 | G | ADD | 147638 | 0.8427 | -7.564 | 3.90E-14 |
| 6 | rs2308655  | 31322303 | G | ADD | 148783 | 0.8606 | -6.618 | 3.64E-11 |
| 6 | rs3819294  | 31322487 | A | ADD | 148770 | 0.7497 | -6.317 | 2.67E-10 |
| 6 | rs3819292  | 31322522 | A | ADD | 148480 | 0.8143 | -6.491 | 8.50E-11 |
| 6 | rs3819288  | 31322694 | C | ADD | 148700 | 0.7894 | -6.144 | 8.04E-10 |
| 6 | rs17193012 | 31322703 | T | ADD | 148765 | 0.7492 | -6.329 | 2.46E-10 |
| 6 | rs1130992  | 31322996 | T | ADD | 148566 | 0.8791 | -5.916 | 3.31E-09 |
| 6 | rs17881225 | 31323065 | C | ADD | 148637 | 0.789  | -6.154 | 7.54E-10 |
| 6 | rs12526858 | 31323721 | C | ADD | 148652 | 0.7467 | -6.357 | 2.06E-10 |
| 6 | rs12528645 | 31323725 | C | ADD | 148648 | 0.7468 | -6.353 | 2.11E-10 |



|   |                        |          |   |     |        |        |        |          |
|---|------------------------|----------|---|-----|--------|--------|--------|----------|
| 6 | rs4999717              | 31324348 | T | ADD | 148743 | 0.7478 | -6.344 | 2.24E-10 |
| 6 | rs17881210             | 31324448 | A | ADD | 148738 | 0.7443 | -6.333 | 2.40E-10 |
| 6 | rs1131161              | 31324891 | T | ADD | 147131 | 0.7472 | -6.335 | 2.37E-10 |
| 6 | rs9266224              | 31325164 | T | ADD | 145455 | 0.8702 | -6.07  | 1.28E-09 |
| 6 | rs34265426             | 31325684 | A | ADD | 148729 | 0.7493 | -6.306 | 2.87E-10 |
| 6 | rs35791140             | 31325795 | T | ADD | 148708 | 0.7478 | -6.343 | 2.25E-10 |
| 6 | 6:31326150_CG<br>_C    | 31326150 | C | ADD | 146325 | 0.7567 | -6.101 | 1.06E-09 |
| 6 | rs35840551             | 31326151 | C | ADD | 147337 | 0.7385 | -6.48  | 9.20E-11 |
| 6 | rs199724218            | 31326153 | C | ADD | 146324 | 0.7567 | -6.101 | 1.06E-09 |
| 6 | rs9405085              | 31326292 | G | ADD | 148742 | 0.7491 | -6.31  | 2.78E-10 |
| 6 | rs9378249              | 31327701 | G | ADD | 148634 | 0.7389 | -6.265 | 3.74E-10 |
| 6 | rs9380248              | 31328475 | T | ADD | 148682 | 0.7519 | -6.221 | 4.95E-10 |
| 6 | rs9366782              | 31328545 | T | ADD | 148681 | 0.7519 | -6.221 | 4.95E-10 |
| 6 | rs9266329              | 31330788 | A | ADD | 148507 | 0.8468 | -5.911 | 3.40E-09 |
| 6 | rs2523559              | 31330969 | C | ADD | 148457 | 1.163  | 7.041  | 1.90E-12 |
| 6 | rs2523557              | 31331257 | G | ADD | 148468 | 1.163  | 7.037  | 1.97E-12 |
| 6 | rs4959062              | 31331500 | G | ADD | 148260 | 0.8712 | -6.247 | 4.20E-10 |
| 6 | rs9266344              | 31331516 | C | ADD | 147598 | 0.8697 | -6.307 | 2.84E-10 |
| 6 | rs9266345              | 31331517 | A | ADD | 147594 | 0.8696 | -6.31  | 2.78E-10 |
| 6 | rs9266361              | 31332919 | T | ADD | 148018 | 0.8706 | -6.273 | 3.55E-10 |
| 6 | rs2523545              | 31333499 | G | ADD | 148783 | 1.163  | 7.048  | 1.82E-12 |
| 6 | rs7761068              | 31333939 | G | ADD | 148710 | 0.8695 | -6.345 | 2.23E-10 |
| 6 | rs144847276            | 31335416 | A | ADD | 148615 | 0.771  | -6.536 | 6.33E-11 |
| 6 | rs9295986              | 31338528 | T | ADD | 148783 | 0.8266 | -6.987 | 2.82E-12 |
| 6 | rs9266520              | 31341493 | C | ADD | 146722 | 0.8604 | -7.02  | 2.21E-12 |
| 6 | rs9266635              | 31346979 | C | ADD | 148763 | 1.153  | 5.858  | 4.69E-09 |
| 6 | rs9266637              | 31347045 | G | ADD | 147732 | 0.8587 | -6.323 | 2.56E-10 |
| 6 | rs9266638              | 31347057 | T | ADD | 148330 | 0.8575 | -6.383 | 1.73E-10 |
| 6 | rs9266642              | 31347201 | T | ADD | 148747 | 0.777  | -6.417 | 1.39E-10 |
| 6 | 6:31347390_CC<br>ATT_C | 31347390 | C | ADD | 148752 | 0.8293 | -8.153 | 3.55E-16 |
| 6 | rs2244020              | 31347451 | G | ADD | 148288 | 0.8294 | -8.139 | 3.97E-16 |
| 6 | rs2844541              | 31347542 | T | ADD | 148272 | 1.153  | 5.863  | 4.54E-09 |
| 6 | rs2523491              | 31347546 | C | ADD | 148777 | 0.8339 | -6.986 | 2.82E-12 |
| 6 | rs2244026              | 31347550 | T | ADD | 148756 | 0.8339 | -6.987 | 2.81E-12 |
| 6 | rs2244027              | 31347566 | G | ADD | 148783 | 0.8326 | -7.051 | 1.78E-12 |
| 6 | rs9266658              | 31347644 | A | ADD | 148783 | 0.8355 | -5.942 | 2.82E-09 |
| 6 | rs4713460              | 31347798 | A | ADD | 148780 | 0.8623 | -5.95  | 2.68E-09 |
| 6 | rs4713462              | 31347816 | A | ADD | 148783 | 0.862  | -5.948 | 2.72E-09 |

|   |                        |          |   |     |        |        |        |          |
|---|------------------------|----------|---|-----|--------|--------|--------|----------|
| 6 | rs9266663              | 31347982 | G | ADD | 148782 | 0.7769 | -6.421 | 1.35E-10 |
| 6 | rs9266688              | 31348543 | A | ADD | 148777 | 0.777  | -6.416 | 1.40E-10 |
| 6 | rs9266701              | 31349030 | T | ADD | 148728 | 0.7756 | -6.455 | 1.08E-10 |
| 6 | rs9266703              | 31349120 | A | ADD | 148719 | 0.7771 | -6.408 | 1.48E-10 |
| 6 | rs9266722              | 31349922 | T | ADD | 148783 | 0.778  | -6.391 | 1.65E-10 |
| 6 | rs4293988              | 31350380 | T | ADD | 148767 | 0.7782 | -6.384 | 1.72E-10 |
| 6 | rs9266729              | 31350463 | G | ADD | 148768 | 0.779  | -6.359 | 2.03E-10 |
| 6 | rs3016014              | 31351153 | G | ADD | 148783 | 1.191  | 7.823  | 5.18E-15 |
| 6 | rs9266749              | 31351313 | T | ADD | 148781 | 0.7779 | -6.394 | 1.62E-10 |
| 6 | rs9266766              | 31351675 | C | ADD | 148655 | 0.7769 | -6.4   | 1.56E-10 |
|   |                        |          | A |     |        |        |        |          |
|   |                        |          | T |     |        |        |        |          |
| 6 | rs34258436             | 31352722 | C | ADD | 148774 | 0.7788 | -6.366 | 1.94E-10 |
| 6 | rs9266774              | 31352880 | T | ADD | 148783 | 0.7781 | -6.389 | 1.67E-10 |
| 6 | rs9266775              | 31353417 | G | ADD | 148765 | 0.7779 | -6.391 | 1.65E-10 |
| 6 | rs3128983              | 31357916 | T | ADD | 117845 | 0.8408 | -7.35  | 1.98E-13 |
| 6 | rs9266788              | 31358284 | C | ADD | 140463 | 1.2    | 8.444  | 3.07E-17 |
| 6 | rs9266790              | 31358450 | A | ADD | 146970 | 1.198  | 6.201  | 5.62E-10 |
| 6 | rs2442734              | 31358749 | C | ADD | 100767 | 0.8581 | -5.841 | 5.18E-09 |
| 6 | rs9348866              | 31358955 | T | ADD | 146977 | 0.8656 | -6.566 | 5.17E-11 |
| 6 | 6:31359428_A<br>G_A    | 31359428 | A | ADD | 148535 | 0.7676 | -5.739 | 9.51E-09 |
| 6 | rs2523468              | 31362891 | C | ADD | 127389 | 1.158  | 6.485  | 8.90E-11 |
| 6 | rs9394070              | 31366295 | A | ADD | 148699 | 0.747  | -6.019 | 1.76E-09 |
| 6 | rs2523455              | 31367077 | A | ADD | 148663 | 1.157  | 6.031  | 1.63E-09 |
| 6 | 6:31367318_A<br>AAAC_A | 31367318 | A | ADD | 113161 | 0.8064 | -6.512 | 7.40E-11 |
| 6 | rs3763287              | 31370329 | A | ADD | 148769 | 0.7463 | -6.043 | 1.52E-09 |
| 6 | rs3763288              | 31370367 | A | ADD | 148783 | 0.746  | -6.046 | 1.48E-09 |
| 6 | rs2507968              | 31372718 | G | ADD | 145404 | 1.168  | 6.086  | 1.16E-09 |
| 6 | rs12174396             | 31374579 | G | ADD | 148617 | 0.7764 | -5.879 | 4.12E-09 |
| 6 | rs9366783              | 31375493 | C | ADD | 148604 | 0.7771 | -5.858 | 4.68E-09 |
| 6 | rs114202986            | 31375917 | C | ADD | 148616 | 0.7415 | -6.103 | 1.04E-09 |
| 6 | rs2523496              | 31377719 | C | ADD | 148061 | 0.819  | -9.277 | 1.75E-20 |
| 6 | rs6938453              | 31377793 | A | ADD | 144547 | 0.7887 | -8.495 | 1.97E-17 |
| 6 | rs28436034             | 31377975 | G | ADD | 144008 | 0.8355 | -6.284 | 3.30E-10 |
| 6 | rs9266806              | 31378022 | C | ADD | 146476 | 0.8082 | -7.456 | 8.95E-14 |
| 6 | rs9380254              | 31378335 | C | ADD | 148783 | 0.7427 | -5.943 | 2.80E-09 |
| 6 | rs1063631              | 31378387 | C | ADD | 148767 | 0.8604 | -5.988 | 2.13E-09 |
| 6 | rs1051786              | 31378425 | G | ADD | 148783 | 0.8632 | -5.867 | 4.43E-09 |
| 6 | rs2853981              | 31378768 | A | ADD | 148689 | 1.184  | 7.967  | 1.62E-15 |

|   |               |          |   |     |        |        |        |          |
|---|---------------|----------|---|-----|--------|--------|--------|----------|
| 6 | rs1051792     | 31378977 | A | ADD | 148772 | 0.8616 | -5.938 | 2.89E-09 |
| 6 | rs1051794     | 31379109 | A | ADD | 148783 | 0.8605 | -5.986 | 2.16E-09 |
| 6 | rs2853977     | 31379304 | A | ADD | 148709 | 1.184  | 7.969  | 1.60E-15 |
| 6 | rs3828878     | 31379377 | G | ADD | 148770 | 0.8615 | -5.942 | 2.82E-09 |
| 6 | rs3828879     | 31379391 | T | ADD | 148718 | 0.7828 | -6.977 | 3.01E-12 |
| 6 | rs3828880     | 31379403 | G | ADD | 148772 | 0.8615 | -5.943 | 2.80E-09 |
| 6 | rs3828881     | 31379549 | T | ADD | 148773 | 0.861  | -5.967 | 2.42E-09 |
| 6 | rs3828882     | 31379620 | A | ADD | 148773 | 0.861  | -5.967 | 2.42E-09 |
| 6 | rs1051796     | 31379773 | T | ADD | 148055 | 0.8613 | -5.924 | 3.15E-09 |
| 6 | rs1131898     | 31379795 | G | ADD | 148755 | 0.8614 | -5.946 | 2.75E-09 |
| 6 | rs1051798     | 31379807 | T | ADD | 148755 | 0.8614 | -5.946 | 2.75E-09 |
| 6 | rs1051799     | 31379823 | G | ADD | 148755 | 0.8614 | -5.946 | 2.75E-09 |
| 6 | rs147915864   | 31380091 | T | ADD | 148612 | 0.8606 | -5.978 | 2.26E-09 |
| 6 | rs748049953   | 31380160 | T | ADD | 138309 | 0.7807 | -6.343 | 2.26E-10 |
| 6 | rs2256174     | 31380422 | A | ADD | 148695 | 1.184  | 7.962  | 1.70E-15 |
| 6 | rs2256183     | 31380529 | A | ADD | 148783 | 1.183  | 7.923  | 2.31E-15 |
| 6 | rs6933734     | 31380587 | A | ADD | 148743 | 0.861  | -5.965 | 2.45E-09 |
| 6 | rs6933621     | 31380710 | T | ADD | 148734 | 0.8613 | -5.954 | 2.62E-09 |
| 6 | rs6934311     | 31380854 | T | ADD | 148624 | 0.8617 | -5.921 | 3.20E-09 |
| 6 | rs9357133     | 31380897 | T | ADD | 148735 | 0.7563 | -5.785 | 7.26E-09 |
| 6 | rs3132467     | 31380943 | A | ADD | 148529 | 0.8614 | -5.932 | 3.00E-09 |
| 6 | rs6934187     | 31380974 | G | ADD | 148563 | 0.8614 | -5.93  | 3.03E-09 |
| 6 | rs6934403     | 31381130 | C | ADD | 148587 | 0.8615 | -5.925 | 3.12E-09 |
| 6 | rs9266813     | 31381321 | G | ADD | 148583 | 0.8617 | -5.916 | 3.30E-09 |
| 6 | rs62395263    | 31381611 | T | ADD | 148751 | 0.7743 | -6.201 | 5.61E-10 |
| 6 | rs3749950     | 31382585 | G | ADD | 148752 | 0.8623 | -5.909 | 3.44E-09 |
| 6 | rs78470849    | 31382675 | T | ADD | 147284 | 0.8379 | -5.732 | 9.92E-09 |
| 6 | rs9266823     | 31382690 | G | ADD | 148728 | 0.8617 | -5.933 | 2.97E-09 |
| 6 | rs9266824     | 31382770 | G | ADD | 148765 | 0.8621 | -5.918 | 3.26E-09 |
| 6 | rs1882        | 31382911 | G | ADD | 148783 | 0.8657 | -6.848 | 7.47E-12 |
| 6 | rs9266829     | 31382964 | G | ADD | 148723 | 0.8609 | -5.967 | 2.42E-09 |
| 6 | rs2596528     | 31385485 | T | ADD | 148693 | 1.183  | 7.94   | 2.02E-15 |
| 6 | rs2596529     | 31385782 | T | ADD | 148765 | 0.7725 | -6.255 | 3.96E-10 |
| 6 | rs2596530     | 31387373 | G | ADD | 148783 | 1.183  | 7.95   | 1.86E-15 |
| 6 | rs2596531     | 31387557 | C | ADD | 148783 | 1.184  | 7.993  | 1.32E-15 |
| 6 | rs2596532     | 31387871 | C | ADD | 148783 | 0.7785 | -6.387 | 1.69E-10 |
| 6 | rs2848716     | 31387967 | C | ADD | 148783 | 0.782  | -6.286 | 3.26E-10 |
| 6 | 6:31388175_GT |          | G |     |        |        |        |          |
| 6 | _G            | 31388175 | T | ADD | 146880 | 1.181  | 7.796  | 6.39E-15 |

|   |                                      |          |   |       |        |        |        |          |
|---|--------------------------------------|----------|---|-------|--------|--------|--------|----------|
| 6 | rs2844511                            | 31389784 | A | ADD   | 148681 | 1.183  | 7.943  | 1.98E-15 |
| 6 | rs2516448                            | 31390410 | T | ADD   | 148653 | 1.184  | 7.98   | 1.46E-15 |
| 6 | rs2596468                            | 31392308 | G | ADD   | 148763 | 0.771  | -6.304 | 2.91E-10 |
| 6 | rs3093959                            | 31392805 | T | ADD   | 148729 | 1.159  | 6.33   | 2.45E-10 |
| 6 | rs2524279                            | 31392906 | G | ADD   | 148783 | 0.7553 | -5.835 | 5.39E-09 |
| 6 | rs2516451                            | 31397658 | G | ADD   | 148533 | 0.7738 | -6.217 | 5.06E-10 |
| 6 | rs2524278                            | 31398784 | T | ADD   | 148755 | 0.7713 | -6.289 | 3.19E-10 |
| 6 | 6:31400305_A<br>GCTGGCAAG<br>GCCAG_A | 31400305 | A | ADD   | 148634 | 0.7681 | -6.363 | 1.98E-10 |
| 6 | rs2263323                            | 31401466 | T | ADD   | 148783 | 0.7516 | -5.908 | 3.46E-09 |
| 6 | rs3130483                            | 31402356 | A | ADD   | 148507 | 1.159  | 6.345  | 2.22E-10 |
| 6 | rs55957433                           | 31402383 | G | ADD   | 144909 | 0.8361 | -6.286 | 3.26E-10 |
| 6 | rs3128980                            | 31402837 | A | ADD   | 147891 | 0.8754 | -6.125 | 9.07E-10 |
| 6 | rs2516449                            | 31404061 | G | ADD   | 148764 | 1.158  | 6.32   | 2.62E-10 |
| 6 | rs138614581                          | 31404170 | A | T ADD | 148635 | 0.78   | -5.794 | 6.87E-09 |
| 6 | rs2596466                            | 31405617 | C | ADD   | 148756 | 0.7526 | -5.886 | 3.95E-09 |
| 6 | rs2844528                            | 31406525 | T | ADD   | 148756 | 1.158  | 6.318  | 2.65E-10 |
| 6 | rs3749939                            | 31407247 | C | ADD   | 147748 | 0.8671 | -5.763 | 8.29E-09 |
| 6 | rs9469008                            | 31409102 | G | ADD   | 148717 | 0.8607 | -5.977 | 2.28E-09 |
| 6 | rs9267084                            | 31409605 | A | ADD   | 147953 | 1.216  | 7.075  | 1.49E-12 |
| 6 | rs2266161                            | 31416025 | A | ADD   | 148774 | 0.7684 | -6.359 | 2.03E-10 |
| 6 | rs2524280                            | 31416990 | A | ADD   | 148783 | 0.7492 | -5.98  | 2.23E-09 |
| 6 | rs3131624                            | 31418562 | T | ADD   | 148673 | 1.166  | 6.745  | 1.54E-11 |
| 6 | rs2516455                            | 31420572 | G | ADD   | 148708 | 1.139  | 5.743  | 9.28E-09 |
| 6 | rs2105957                            | 31421640 | G | ADD   | 148308 | 0.7616 | -6.428 | 1.29E-10 |
| 6 | rs3099847                            | 31423060 | T | ADD   | 145087 | 0.7831 | -5.795 | 6.81E-09 |
| 6 | rs368333960                          | 31423465 | C | ADD   | 135623 | 0.8103 | -7.029 | 2.09E-12 |
| 6 | rs3128984                            | 31424528 | G | ADD   | 147443 | 0.7565 | -5.784 | 7.31E-09 |
| 6 | rs3093971                            | 31424607 | A | ADD   | 148660 | 0.7528 | -7.267 | 3.68E-13 |
| 6 | rs2523684                            | 31426399 | G | ADD   | 148783 | 0.7508 | -5.943 | 2.79E-09 |
| 6 | rs2523650                            | 31449022 | T | ADD   | 148783 | 1.153  | 6.451  | 1.11E-10 |
| 6 | rs2905752                            | 31450716 | A | ADD   | 148747 | 1.16   | 6.828  | 8.59E-12 |
| 6 | rs2904789                            | 31452432 | C | ADD   | 148496 | 1.131  | 5.818  | 5.97E-09 |
| 6 | rs2905739                            | 31452850 | G | ADD   | 148744 | 1.16   | 6.813  | 9.54E-12 |
| 6 | rs2428501                            | 31453547 | A | ADD   | 148783 | 1.164  | 6.992  | 2.70E-12 |
| 6 | rs9267246                            | 31455767 | A | ADD   | 145662 | 1.142  | 6.146  | 7.95E-10 |
| 6 | rs9267247                            | 31455834 | A | ADD   | 148228 | 1.131  | 5.742  | 9.34E-09 |
| 6 | rs9267257                            | 31456262 | A | ADD   | 148650 | 1.161  | 5.777  | 7.60E-09 |

|   |                            |          |   |     |        |       |       |          |
|---|----------------------------|----------|---|-----|--------|-------|-------|----------|
| 6 | rs9267260                  | 31456398 | A | ADD | 148026 | 1.133 | 5.821 | 5.85E-09 |
| 6 | rs2904786                  | 31456587 | C | ADD | 146970 | 1.136 | 5.937 | 2.90E-09 |
| 6 | rs2905732                  | 31456937 | G | ADD | 147938 | 1.133 | 5.826 | 5.68E-09 |
| 6 | rs2904782                  | 31457385 | T | ADD | 144050 | 1.147 | 6.273 | 3.54E-10 |
| 6 | rs2905729                  | 31457742 | A | ADD | 148208 | 1.131 | 5.763 | 8.26E-09 |
| 6 | rs9267293                  | 31458508 | G | ADD | 148657 | 1.16  | 5.763 | 8.27E-09 |
| 6 | rs7450417                  | 31459254 | G | ADD | 148392 | 1.131 | 5.755 | 8.65E-09 |
| 6 | rs9267306                  | 31459373 | A | ADD | 148394 | 1.131 | 5.755 | 8.66E-09 |
| 6 | rs2904787                  | 31459768 | A | ADD | 148531 | 1.133 | 5.823 | 5.79E-09 |
| 6 | rs2904783                  | 31459972 | C | ADD | 148473 | 1.133 | 5.851 | 4.88E-09 |
| 6 | rs2395038                  | 31460451 | T | ADD | 148431 | 1.133 | 5.844 | 5.11E-09 |
| 6 | rs3094006                  | 31461558 | T | ADD | 148382 | 1.143 | 5.853 | 4.84E-09 |
| 6 | rs3132461                  | 31480668 | G | ADD | 148332 | 1.167 | 6.105 | 1.03E-09 |
| 6 | rs2516403                  | 31480874 | C | ADD | 148783 | 1.139 | 5.979 | 2.25E-09 |
| 6 | rs2516401                  | 31480906 | G | ADD | 148761 | 1.157 | 6.536 | 6.32E-11 |
| 6 | rs3131633                  | 31480923 | A | ADD | 148783 | 1.163 | 5.894 | 3.78E-09 |
| 6 | rs3132458                  | 31481113 | T | ADD | 148698 | 1.168 | 6.157 | 7.41E-10 |
| 6 | rs2246871                  | 31481146 | C | ADD | 148783 | 1.135 | 5.906 | 3.51E-09 |
| 6 | rs2516398                  | 31481526 | G | ADD | 148639 | 1.139 | 5.996 | 2.03E-09 |
| 6 | rs2516493                  | 31482714 | T | ADD | 148590 | 1.14  | 6.02  | 1.74E-09 |
| 6 | rs2516492                  | 31482727 | A | ADD | 148590 | 1.14  | 6.02  | 1.74E-09 |
| 6 | rs2844494                  | 31483415 | C | ADD | 148783 | 1.14  | 6.032 | 1.62E-09 |
| 6 | rs3094001                  | 31484032 | T | ADD | 148674 | 1.169 | 6.237 | 4.47E-10 |
|   |                            |          | T |     |        |       |       |          |
|   |                            |          | C |     |        |       |       |          |
| 6 | 6:31484731_TC<br>TC_T      | 31484731 | C | ADD | 134706 | 1.166 | 5.81  | 6.26E-09 |
| 6 | 6:31486158_GT<br>_G        | 31486158 | T | ADD | 148208 | 1.16  | 6.244 | 4.27E-10 |
| 6 | rs3130638                  | 31487540 | T | ADD | 148666 | 1.181 | 6.393 | 1.63E-10 |
| 6 | rs3093982<br>6:31498379_CA | 31497244 | A | ADD | 148755 | 1.18  | 6.367 | 1.92E-10 |
| 6 | _C                         | 31498379 | A | ADD | 145494 | 1.168 | 6.023 | 1.71E-09 |
| 6 | rs9267480                  | 31498384 | C | ADD | 145533 | 1.168 | 6.016 | 1.78E-09 |
| 6 | rs3093977<br>6:31514972_CT | 31500226 | C | ADD | 148753 | 1.181 | 6.398 | 1.57E-10 |
| 6 | _C                         | 31514972 | T | ADD | 148606 | 1.182 | 6.417 | 1.39E-10 |
| 6 | rs2516383                  | 31519653 | C | ADD | 148740 | 1.157 | 6.276 | 3.47E-10 |
| 6 | rs2516396                  | 31521913 | A | ADD | 148717 | 1.157 | 6.284 | 3.30E-10 |
| 6 | rs2857605                  | 31524851 | C | ADD | 148783 | 1.171 | 6.359 | 2.03E-10 |
| 6 | rs2516479                  | 31528326 | G | ADD | 148674 | 1.134 | 5.863 | 4.54E-09 |
| 6 | rs2516392                  | 31529334 | C | ADD | 148684 | 1.133 | 5.829 | 5.58E-09 |

|   |               |          |   |     |        |        |        |          |
|---|---------------|----------|---|-----|--------|--------|--------|----------|
| 6 | rs2516391     | 31529335 | T | ADD | 148684 | 1.133  | 5.829  | 5.58E-09 |
| 6 | rs2516390     | 31529883 | C | ADD | 148778 | 1.133  | 5.807  | 6.37E-09 |
| 6 | rs3094595     | 31530574 | G | ADD | 148780 | 1.133  | 5.807  | 6.38E-09 |
|   | 6:31530636_CA |          | C |     |        |        |        |          |
| 6 | A_C           | 31530636 | A | ADD | 147209 | 1.141  | 5.934  | 2.96E-09 |
| 6 | rs928815      | 31531215 | T | ADD | 148783 | 1.133  | 5.809  | 6.29E-09 |
| 6 | rs3135043     | 31532193 | G | ADD | 148781 | 1.133  | 5.807  | 6.35E-09 |
| 6 | rs3135042     | 31532254 | G | ADD | 148781 | 1.133  | 5.807  | 6.35E-09 |
| 6 | rs2857710     | 31532553 | C | ADD | 148773 | 1.133  | 5.814  | 6.10E-09 |
| 6 | rs2857602     | 31533378 | G | ADD | 148783 | 1.132  | 5.805  | 6.45E-09 |
| 6 | rs2844486     | 31533870 | A | ADD | 148769 | 1.133  | 5.813  | 6.12E-09 |
| 6 | rs2844485     | 31534206 | A | ADD | 148769 | 1.133  | 5.813  | 6.12E-09 |
| 6 | rs1121800     | 31535074 | A | ADD | 148757 | 1.133  | 5.834  | 5.42E-09 |
| 6 | rs2844484     | 31536224 | A | ADD | 148783 | 1.133  | 5.822  | 5.80E-09 |
| 6 | rs2844483     | 31536796 | T | ADD | 148710 | 1.133  | 5.817  | 5.99E-09 |
| 6 | rs746868      | 31540429 | C | ADD | 148737 | 1.133  | 5.804  | 6.46E-09 |
| 6 | rs2736190     | 31561211 | T | ADD | 147503 | 1.151  | 6.057  | 1.39E-09 |
| 6 | rs2844481     | 31563429 | T | ADD | 147548 | 1.151  | 6.052  | 1.43E-09 |
| 6 | rs2857596     | 31567422 | G | ADD | 147329 | 1.149  | 5.987  | 2.14E-09 |
| 6 | rs805284      | 31682029 | A | ADD | 148783 | 1.26   | 5.827  | 5.63E-09 |
| 6 | rs2844456     | 31864674 | C | ADD | 148783 | 1.264  | 5.894  | 3.77E-09 |
|   |               |          | G |     |        |        |        |          |
| 6 | rs750497811   | 31866846 | A | ADD | 147954 | 1.281  | 5.973  | 2.32E-09 |
| 6 | rs2844454     | 31873292 | T | ADD | 148449 | 1.265  | 5.854  | 4.79E-09 |
| 6 | rs34562262    | 32020961 | C | ADD | 148783 | 1.267  | 5.909  | 3.45E-09 |
| 6 | rs41268924    | 32135137 | A | ADD | 148783 | 1.263  | 5.796  | 6.80E-09 |
|   | 6:32147044_A  |          |   |     |        |        |        |          |
| 6 | AG_A          | 32147044 | A | ADD | 148778 | 1.264  | 5.831  | 5.52E-09 |
| 6 | rs41268928    | 32147157 | C | ADD | 148783 | 1.262  | 5.793  | 6.91E-09 |
| 6 | rs9391855     | 32149801 | T | ADD | 148719 | 1.27   | 6.137  | 8.39E-10 |
| 6 | rs2070600     | 32151443 | T | ADD | 148783 | 1.273  | 6.255  | 3.98E-10 |
| 6 | rs41268932    | 32154711 | G | ADD | 148783 | 1.265  | 5.745  | 9.19E-09 |
| 6 | rs2022059     | 32156489 | C | ADD | 148768 | 1.274  | 6.221  | 4.93E-10 |
| 6 | rs2856437     | 32157364 | A | ADD | 148783 | 1.272  | 6.179  | 6.46E-10 |
| 6 | rs8192574     | 32169145 | A | ADD | 148770 | 1.269  | 5.893  | 3.80E-09 |
| 6 | rs3096702     | 32192331 | A | ADD | 148783 | 1.168  | 7.338  | 2.17E-13 |
| 6 | rs767016638   | 32193303 | C | ADD | 125673 | 0.8309 | -7.552 | 4.28E-14 |
| 6 | rs9267853     | 32195251 | T | ADD | 147987 | 1.166  | 7.172  | 7.38E-13 |
| 6 | rs3132949     | 32195935 | C | ADD | 148518 | 0.8748 | -5.766 | 8.11E-09 |
| 6 | rs9267858     | 32196575 | T | ADD | 148186 | 1.135  | 5.943  | 2.80E-09 |

|   |               |          |   |     |        |        |        |          |
|---|---------------|----------|---|-----|--------|--------|--------|----------|
| 6 | rs7739432     | 32198474 | T | ADD | 148293 | 1.133  | 5.866  | 4.47E-09 |
| 6 | rs9267873     | 32199352 | C | ADD | 148783 | 1.131  | 5.785  | 7.27E-09 |
| 6 | rs9267897     | 32202817 | C | ADD | 148763 | 1.13   | 5.755  | 8.68E-09 |
| 6 | rs9267898     | 32202935 | T | ADD | 148755 | 1.133  | 5.868  | 4.41E-09 |
| 6 | rs9267907     | 32204926 | T | ADD | 148765 | 1.13   | 5.757  | 8.57E-09 |
| 6 | rs6900833     | 32205863 | C | ADD | 148737 | 1.133  | 5.868  | 4.42E-09 |
| 6 | rs9267919     | 32206103 | C | ADD | 146302 | 1.146  | 6.276  | 3.47E-10 |
| 6 | rs6906174     | 32206399 | T | ADD | 146017 | 1.131  | 5.74   | 9.46E-09 |
| 6 | rs113547322   | 32206619 | T | ADD | 146844 | 0.8156 | -6.08  | 1.20E-09 |
| 6 | rs9267947     | 32211218 | G | ADD | 148783 | 0.863  | -6.933 | 4.13E-12 |
| 6 | rs9267948     | 32212233 | G | ADD | 148783 | 1.147  | 6.511  | 7.46E-11 |
| 6 | rs9267949     | 32212237 | T | ADD | 148212 | 1.151  | 6.612  | 3.80E-11 |
| 6 | rs9267950     | 32212241 | T | ADD | 148175 | 1.151  | 6.607  | 3.93E-11 |
|   |               |          | C |     |        |        |        |          |
|   |               |          | T |     |        |        |        |          |
| 6 | rs768701081   | 32212462 | T | ADD | 145099 | 1.142  | 6.195  | 5.82E-10 |
| 6 | rs6913664     | 32295874 | T | ADD | 148693 | 0.8702 | -6.546 | 5.92E-11 |
| 6 | rs1076712     | 32300152 | C | ADD | 148783 | 0.8777 | -5.889 | 3.88E-09 |
| 6 | rs1474727     | 32300638 | T | ADD | 148756 | 0.8781 | -5.869 | 4.39E-09 |
| 6 | rs2273019     | 32306419 | T | ADD | 148783 | 0.8797 | -5.807 | 6.35E-09 |
| 6 | rs3129902     | 32310194 | A | ADD | 148781 | 0.8774 | -5.907 | 3.48E-09 |
| 6 | rs3117136     | 32310811 | C | ADD | 148782 | 0.8774 | -5.907 | 3.49E-09 |
| 6 | rs3132954     | 32311459 | A | ADD | 148783 | 0.8507 | -7.411 | 1.25E-13 |
| 6 | rs7383143     | 32312351 | T | ADD | 148783 | 0.8774 | -5.907 | 3.49E-09 |
| 6 | rs4576281     | 32312650 | C | ADD | 148782 | 0.8793 | -5.824 | 5.73E-09 |
| 6 | rs3117135     | 32313531 | C | ADD | 148782 | 0.8773 | -5.912 | 3.38E-09 |
| 6 | rs3117134     | 32313550 | C | ADD | 148782 | 0.8773 | -5.912 | 3.38E-09 |
|   |               |          | C |     |        |        |        |          |
| 6 | rs35406322    | 32314182 | G | ADD | 148782 | 0.8773 | -5.912 | 3.38E-09 |
|   | 6:32314306_CC |          |   |     |        |        |        |          |
|   | TGTCTTTTAA    |          |   |     |        |        |        |          |
| 6 | AATA_C        | 32314306 | C | ADD | 145994 | 0.8782 | -5.779 | 7.52E-09 |
| 6 | rs2395147     | 32314484 | A | ADD | 148781 | 0.8773 | -5.913 | 3.37E-09 |
| 6 | rs3117131     | 32314594 | T | ADD | 148781 | 0.8773 | -5.913 | 3.37E-09 |
| 6 | rs3117130     | 32314877 | G | ADD | 148730 | 0.8776 | -5.874 | 4.26E-09 |
| 6 | rs910050      | 32315654 | C | ADD | 148783 | 0.8772 | -5.917 | 3.27E-09 |
| 6 | rs969893      | 32316081 | A | ADD | 148783 | 0.8773 | -5.912 | 3.38E-09 |
| 6 | rs969891      | 32316415 | C | ADD | 148766 | 0.8773 | -5.908 | 3.47E-09 |
| 6 | rs3117122     | 32316604 | T | ADD | 148783 | 0.8786 | -5.841 | 5.20E-09 |
| 6 | rs3117121     | 32316615 | G | ADD | 148783 | 0.8773 | -5.911 | 3.40E-09 |
| 6 | rs3117120     | 32316804 | C | ADD | 148783 | 0.8773 | -5.912 | 3.38E-09 |

|   |                                         |          |   |     |        |        |        |          |
|---|-----------------------------------------|----------|---|-----|--------|--------|--------|----------|
| 6 | rs2076539                               | 32317467 | C | ADD | 148783 | 0.8773 | -5.909 | 3.44E-09 |
| 6 | rs2076537                               | 32317635 | A | ADD | 148783 | 0.877  | -5.924 | 3.14E-09 |
| 6 | rs761189                                | 32317859 | C | ADD | 148783 | 0.877  | -5.927 | 3.08E-09 |
| 6 | rs761188                                | 32317973 | G | ADD | 148783 | 0.8777 | -5.893 | 3.79E-09 |
| 6 | rs2223636                               | 32331209 | A | ADD | 148777 | 0.8793 | -5.826 | 5.68E-09 |
| 6 | rs62404579                              | 32376019 | T | ADD | 148581 | 0.7183 | -6.566 | 5.18E-11 |
| 6 | rs3129963                               | 32380208 | G | ADD | 148476 | 0.849  | -5.839 | 5.26E-09 |
| 6 | rs3129965                               | 32380830 | C | ADD | 148420 | 0.8496 | -5.811 | 6.21E-09 |
| 6 | rs3129967                               | 32381461 | T | ADD | 146725 | 0.8717 | -5.862 | 4.56E-09 |
| 6 | rs3129968                               | 32381472 | C | ADD | 146734 | 0.8716 | -5.868 | 4.41E-09 |
| 6 | rs743862                                | 32381939 | C | ADD | 146237 | 0.8388 | -7.706 | 1.30E-14 |
|   |                                         |          | A |     |        |        |        |          |
|   |                                         |          | A |     |        |        |        |          |
|   |                                         |          | A |     |        |        |        |          |
|   |                                         |          | A |     |        |        |        |          |
|   |                                         |          | G |     |        |        |        |          |
|   |                                         |          | A |     |        |        |        |          |
|   |                                         |          | A |     |        |        |        |          |
|   |                                         |          | G |     |        |        |        |          |
| 6 | rs143325653                             | 32382272 | G | ADD | 146597 | 0.8496 | -7.652 | 1.97E-14 |
| 6 | rs9268543                               | 32384801 | T | ADD | 147278 | 1.173  | 6.174  | 6.65E-10 |
| 6 | rs3135369                               | 32387221 | A | ADD | 148778 | 0.8602 | -5.827 | 5.63E-09 |
| 6 | 6:32387373_G<br>GAAA_G                  | 32387373 | G | ADD | 148781 | 1.155  | 5.891  | 3.84E-09 |
| 6 | rs2395163                               | 32387809 | C | ADD | 148783 | 1.155  | 5.889  | 3.88E-09 |
|   |                                         |          | A |     |        |        |        |          |
| 6 | rs149900446                             | 32392268 | T | ADD | 147800 | 0.8523 | -5.768 | 8.04E-09 |
| 6 | rs2157333                               | 32392591 | C | ADD | 148694 | 0.8703 | -6.038 | 1.56E-09 |
| 6 | rs732162                                | 32394913 | A | ADD | 148715 | 0.8703 | -6.041 | 1.54E-09 |
| 6 | rs3129844                               | 32395835 | G | ADD | 148774 | 0.8421 | -7.272 | 3.55E-13 |
| 6 | rs3129845                               | 32396277 | G | ADD | 148782 | 0.8455 | -7.129 | 1.02E-12 |
| 6 | rs3135343                               | 32396313 | T | ADD | 148782 | 0.8455 | -7.129 | 1.01E-12 |
| 6 | rs3129846                               | 32396475 | G | ADD | 148783 | 0.8454 | -7.13  | 1.01E-12 |
| 6 | rs3129847                               | 32396506 | G | ADD | 148783 | 0.8421 | -7.273 | 3.51E-13 |
| 6 | rs3135342                               | 32396615 | T | ADD | 148783 | 0.8421 | -7.273 | 3.51E-13 |
| 6 | rs9268581                               | 32396930 | A | ADD | 148709 | 1.15   | 5.737  | 9.61E-09 |
| 6 | rs3129848                               | 32397049 | A | ADD | 148776 | 0.842  | -7.277 | 3.41E-13 |
| 6 | rs3129851                               | 32397712 | C | ADD | 148775 | 0.842  | -7.278 | 3.40E-13 |
| 6 | rs3129853                               | 32398648 | A | ADD | 148783 | 0.8402 | -7.366 | 1.75E-13 |
| 6 | rs3135340                               | 32398872 | G | ADD | 148781 | 0.842  | -7.28  | 3.34E-13 |
|   | 6:32398917_GT<br>ATACACATA<br>TACCATATG |          |   |     |        |        |        |          |
| 6 | ACA_G                                   | 32398917 | G | ADD | 148496 | 0.8411 | -7.31  | 2.66E-13 |
| 6 | rs4988822                               | 32398975 | T | ADD | 148779 | 0.842  | -7.277 | 3.41E-13 |



|   |                     |          |   |     |        |        |        |          |
|---|---------------------|----------|---|-----|--------|--------|--------|----------|
| 6 | rs4988821           | 32399022 | G | ADD | 148777 | 0.8425 | -7.254 | 4.05E-13 |
| 6 | rs4988820           | 32399158 | T | ADD | 148779 | 0.8424 | -7.258 | 3.93E-13 |
| 6 | rs3135339           | 32399261 | G | ADD | 148783 | 0.842  | -7.276 | 3.45E-13 |
| 6 | rs3129857           | 32399785 | G | ADD | 148782 | 0.8419 | -7.281 | 3.31E-13 |
| 6 | rs2395172           | 32399842 | C | ADD | 148782 | 0.8419 | -7.283 | 3.27E-13 |
| 6 | rs3129858           | 32400520 | A | ADD | 148783 | 0.8403 | -7.356 | 1.90E-13 |
| 6 | rs3129859           | 32400939 | C | ADD | 148783 | 0.8521 | -6.922 | 4.44E-12 |
| 6 | rs3135337           | 32401534 | T | ADD | 148781 | 0.8419 | -7.281 | 3.32E-13 |
| 6 | rs5875370           | 32403240 | T | ADD | 148757 | 0.8416 | -7.295 | 2.99E-13 |
| 6 | rs983561            | 32403655 | G | ADD | 148783 | 0.8419 | -7.281 | 3.31E-13 |
| 6 | rs3135398           | 32403934 | T | ADD | 148781 | 0.842  | -7.28  | 3.35E-13 |
| 6 | rs3129864           | 32404043 | G | ADD | 148781 | 0.842  | -7.28  | 3.33E-13 |
| 6 | rs3129865           | 32404048 | G | ADD | 148781 | 1.175  | 5.748  | 9.02E-09 |
| 6 | rs5000563           | 32404135 | G | ADD | 148783 | 0.842  | -7.28  | 3.35E-13 |
| 6 | rs3135396           | 32404213 | T | ADD | 148782 | 0.842  | -7.279 | 3.36E-13 |
| 6 | rs2395174           | 32404878 | G | ADD | 148781 | 0.842  | -7.28  | 3.35E-13 |
| 6 | rs2395176           | 32405062 | T | ADD | 148781 | 0.842  | -7.279 | 3.37E-13 |
| 6 | rs2395177           | 32405076 | C | ADD | 148781 | 0.842  | -7.279 | 3.37E-13 |
| 6 | rs3129870           | 32406100 | T | ADD | 148709 | 0.8406 | -7.341 | 2.12E-13 |
| 6 | rs9268632           | 32406412 | G | ADD | 148780 | 0.8408 | -7.334 | 2.23E-13 |
| 6 | rs9268641           | 32406887 | T | ADD | 148777 | 0.8408 | -7.334 | 2.24E-13 |
| 6 | rs3129872           | 32407153 | T | ADD | 148783 | 0.8401 | -7.365 | 1.77E-13 |
| 6 | rs2395179           | 32407302 | G | ADD | 148774 | 0.8441 | -7.193 | 6.35E-13 |
| 6 | rs2395180           | 32407310 | G | ADD | 148766 | 0.8445 | -7.174 | 7.26E-13 |
| 6 | rs2395181           | 32407404 | C | ADD | 148783 | 0.8443 | -7.184 | 6.78E-13 |
| 6 | rs3129873           | 32407433 | C | ADD | 148743 | 0.8411 | -7.321 | 2.47E-13 |
| 6 | rs3129874           | 32407440 | C | ADD | 148724 | 0.8408 | -7.332 | 2.27E-13 |
| 6 | rs3129875           | 32407468 | C | ADD | 148706 | 0.844  | -7.197 | 6.18E-13 |
| 6 | rs3129876           | 32408012 | A | ADD | 148783 | 0.8445 | -7.17  | 7.50E-13 |
| 6 | rs3129877           | 32408597 | A | ADD | 148783 | 0.8359 | -7.575 | 3.60E-14 |
| 6 | rs3129878           | 32408735 | C | ADD | 148783 | 0.8381 | -7.562 | 3.97E-14 |
| 6 | rs3129879           | 32408907 | A | ADD | 148782 | 0.8449 | -7.174 | 7.27E-13 |
| 6 | 6:32409188_G<br>A_G | 32409188 | G | ADD | 148752 | 0.8358 | -7.562 | 3.96E-14 |
| 6 | rs3135392           | 32409242 | A | ADD | 148783 | 0.851  | -7.349 | 2.00E-13 |
| 6 | rs3129881           | 32409484 | T | ADD | 148783 | 0.8357 | -7.567 | 3.83E-14 |
| 6 | rs7197              | 32412580 | T | ADD | 148749 | 1.178  | 6.169  | 6.89E-10 |
| 6 | rs3129891           | 32415080 | A | ADD | 148783 | 0.8556 | -5.762 | 8.30E-09 |
| 6 | rs9268805           | 32423399 | G | ADD | 147408 | 0.8378 | -8.075 | 6.72E-16 |

|   |             |          |   |     |        |        |        |          |          |
|---|-------------|----------|---|-----|--------|--------|--------|----------|----------|
| 6 | rs9268833   | 32428062 | T | ADD | 148783 | 1.137  | 5.797  | 6.75E-09 |          |
| 6 | rs9268834   | 32428079 | A | ADD | 148761 | 1.136  | 5.76   | 8.39E-09 |          |
| 6 | rs9268835   | 32428115 | A | ADD | 148783 | 1.137  | 5.777  | 7.61E-09 |          |
| 6 | rs9268838   | 32428715 | A | ADD | 148780 | 1.137  | 5.79   | 7.06E-09 |          |
| 6 | rs9268926   | 32433067 | G | ADD | 133591 | 1.199  | 7.112  | 1.15E-12 |          |
| 6 | rs2894257   | 32433276 | T | ADD | 100141 | 0.8426 | -6.185 | 6.23E-10 |          |
| 6 | rs9268999   | 32435874 | C | ADD | 142612 | 0.8585 | -5.824 | 5.75E-09 |          |
| 6 | rs9391873   | 32436350 | G | ADD | 122572 | 1.282  | 7.469  | 8.08E-14 |          |
| 6 | rs17209747  | 32441392 | T | ADD | 125635 | 1.286  | 6.707  | 1.99E-11 |          |
| 6 | rs6901903   | 32442436 | C | ADD | 130404 | 0.8598 | -5.821 | 5.85E-09 |          |
| 6 | rs9269108   | 32443223 | A | ADD | 148736 | 0.8396 | -7.764 | 8.25E-15 |          |
| 6 | rs9269146   | 32445530 | G | ADD | 147599 | 0.8418 | -7.654 | 1.95E-14 |          |
| 6 | rs10947290  | 32446269 | A | ADD | 146284 | 0.6939 | -7.285 | 3.22E-13 |          |
| 6 | rs373088803 | 32448052 | A | G   | ADD    | 136744 | 1.215  | 7.449    | 9.42E-14 |
| 6 | rs72508409  | 32451073 | G | ADD | 114592 | 0.7598 | -6.494 | 8.36E-11 |          |
| 6 | rs9269232   | 32451760 | T | ADD | 144249 | 0.8505 | -7.235 | 4.65E-13 |          |
| 6 | rs71565332  | 32451822 | T | ADD | 135092 | 1.197  | 7.338  | 2.16E-13 |          |
| 6 | rs71565338  | 32452110 | T | ADD | 124071 | 1.226  | 6.657  | 2.80E-11 |          |
| 6 | rs9269237   | 32453583 | T | ADD | 138538 | 0.8658 | -6.245 | 4.24E-10 |          |
| 6 | rs9269250   | 32454269 | T | ADD | 111498 | 0.8448 | -6.833 | 8.30E-12 |          |
| 6 | rs9269252   | 32454293 | A | ADD | 122840 | 0.8441 | -7.15  | 8.69E-13 |          |
| 6 | rs9269254   | 32454327 | T | ADD | 126865 | 0.8563 | -6.599 | 4.13E-11 |          |
| 6 | rs72508413  | 32454597 | G | ADD | 140165 | 0.8359 | -7.544 | 4.55E-14 |          |
| 6 | rs73731419  | 32454694 | C | ADD | 141631 | 1.172  | 5.789  | 7.10E-09 |          |
| 6 | rs148967059 | 32454755 | A | ADD | 111315 | 1.232  | 6.763  | 1.35E-11 |          |
| 6 | rs181133225 | 32454764 | C | ADD | 122078 | 1.258  | 5.977  | 2.27E-09 |          |
| 6 | rs73401326  | 32454783 | G | ADD | 76547  | 0.7983 | -7.403 | 1.33E-13 |          |
| 6 | rs182965163 | 32454827 | A | ADD | 76441  | 0.7975 | -7.423 | 1.15E-13 |          |
| 6 | rs202162787 | 32454828 | G | ADD | 76441  | 0.7975 | -7.423 | 1.15E-13 |          |
| 6 | rs142972412 | 32454837 | T | ADD | 130102 | 1.176  | 5.871  | 4.33E-09 |          |
| 6 | rs145092566 | 32454838 | A | ADD | 75474  | 0.8031 | -7.102 | 1.23E-12 |          |
| 6 | rs139029897 | 32454882 | G | ADD | 86760  | 0.8052 | -7.756 | 8.74E-15 |          |
| 6 | rs114141268 | 32454899 | G | ADD | 137499 | 1.177  | 5.92   | 3.23E-09 |          |
| 6 | rs76483802  | 32454913 | G | ADD | 130851 | 0.8674 | -5.787 | 7.19E-09 |          |
| 6 | rs139465672 | 32454920 | C | ADD | 137542 | 1.176  | 5.897  | 3.71E-09 |          |
| 6 | rs149234868 | 32454921 | A | ADD | 85396  | 1.227  | 7.329  | 2.32E-13 |          |
| 6 | rs73401330  | 32454968 | A | ADD | 105312 | 1.188  | 5.882  | 4.06E-09 |          |
| 6 | rs75310737  | 32454993 | C | ADD | 138531 | 1.178  | 5.964  | 2.45E-09 |          |

|   |             |          |   |     |        |        |        |          |
|---|-------------|----------|---|-----|--------|--------|--------|----------|
| 6 | rs75495772  | 32455718 | G | ADD | 123952 | 1.242  | 6.188  | 6.10E-10 |
| 6 | rs550730214 | 32455719 | C | T   | 123952 | 1.242  | 6.188  | 6.10E-10 |
| 6 | rs553071835 | 32455724 | T | ADD | 123952 | 1.242  | 6.188  | 6.10E-10 |
| 6 | rs77497538  | 32455725 | G | ADD | 123892 | 1.241  | 6.167  | 6.95E-10 |
| 6 | rs55723336  | 32457250 | G | ADD | 94009  | 1.249  | 6.678  | 2.42E-11 |
| 6 | rs75620297  | 32457324 | C | ADD | 90528  | 1.247  | 8.009  | 1.16E-15 |
| 6 | rs78845660  | 32457325 | T | ADD | 89813  | 1.252  | 8.126  | 4.45E-16 |
| 6 | rs76883199  | 32457539 | C | ADD | 143889 | 1.176  | 5.935  | 2.93E-09 |
| 6 | rs75301863  | 32457566 | T | ADD | 144183 | 1.176  | 5.95   | 2.68E-09 |
| 6 | rs78583156  | 32457599 | T | ADD | 90022  | 1.232  | 6.877  | 6.10E-12 |
| 6 | rs113174592 | 32457619 | C | ADD | 89913  | 1.232  | 6.855  | 7.15E-12 |
| 6 | rs77312051  | 32457665 | A | ADD | 96021  | 1.222  | 6.732  | 1.67E-11 |
| 6 | rs58937009  | 32457727 | A | ADD | 89397  | 1.243  | 7.932  | 2.15E-15 |
| 6 | rs58095553  | 32457733 | G | ADD | 89397  | 1.243  | 7.932  | 2.15E-15 |
| 6 | rs77964335  | 32457866 | T | ADD | 140916 | 1.172  | 5.77   | 7.91E-09 |
| 6 | rs80133970  | 32457880 | A | ADD | 140968 | 1.172  | 5.778  | 7.57E-09 |
| 6 | rs113133909 | 32457928 | T | ADD | 109893 | 0.8398 | -6.892 | 5.48E-12 |
| 6 | rs534859262 | 32457931 | T | ADD | 109893 | 0.8398 | -6.892 | 5.48E-12 |
| 6 | rs542536566 | 32457959 | T | ADD | 109402 | 0.8392 | -6.899 | 5.23E-12 |
| 6 | rs186217224 | 32457967 | C | ADD | 109137 | 0.8389 | -6.904 | 5.04E-12 |
| 6 | rs180756398 | 32458010 | A | ADD | 107659 | 0.8272 | -7.41  | 1.26E-13 |
| 6 | rs73401349  | 32458094 | C | ADD | 98812  | 0.8341 | -6.949 | 3.67E-12 |
| 6 | rs111890942 | 32458131 | C | ADD | 92603  | 0.8281 | -7.06  | 1.66E-12 |
| 6 | rs78947187  | 32458169 | A | ADD | 120457 | 1.165  | 5.99   | 2.09E-09 |
| 6 | rs72849265  | 32458208 | T | ADD | 92918  | 0.8255 | -7.179 | 7.00E-13 |
| 6 | rs62405571  | 32458228 | T | ADD | 143337 | 1.171  | 5.793  | 6.92E-09 |
| 6 | rs62405572  | 32458232 | A | ADD | 76799  | 1.27   | 7.781  | 7.19E-15 |
| 6 | rs62405573  | 32458239 | G | ADD | 76769  | 1.27   | 7.778  | 7.39E-15 |
| 6 | rs62405575  | 32458259 | A | ADD | 83212  | 1.264  | 7.774  | 7.60E-15 |
| 6 | rs200402299 | 32458349 | A | ADD | 89069  | 0.8071 | -8.01  | 1.15E-15 |
| 6 | rs369376349 | 32458425 | G | ADD | 72558  | 1.198  | 5.885  | 3.98E-09 |
| 6 | rs111458169 | 32458991 | A | ADD | 137451 | 1.174  | 5.79   | 7.03E-09 |
| 6 | rs186920750 | 32459175 | T | ADD | 140261 | 1.172  | 5.788  | 7.11E-09 |
| 6 | rs191818300 | 32459176 | A | ADD | 140265 | 1.172  | 5.785  | 7.25E-09 |
| 6 | rs557676328 | 32459223 | T | ADD | 140123 | 1.174  | 5.841  | 5.18E-09 |
| 6 | rs573113955 | 32459233 | G | ADD | 140266 | 1.171  | 5.748  | 9.00E-09 |
| 6 | rs560518806 | 32459292 | A | ADD | 136217 | 1.177  | 5.909  | 3.45E-09 |
| 6 | rs549250780 | 32459294 | T | ADD | 136217 | 1.177  | 5.909  | 3.45E-09 |

|   |             |          |   |     |        |        |        |          |
|---|-------------|----------|---|-----|--------|--------|--------|----------|
| 6 | rs191593025 | 32459304 | T | ADD | 136219 | 1.177  | 5.91   | 3.41E-09 |
| 6 | rs182144635 | 32459309 | T | ADD | 136222 | 1.177  | 5.911  | 3.40E-09 |
| 6 | rs76803697  | 32459456 | A | ADD | 140403 | 1.17   | 5.742  | 9.34E-09 |
| 6 | rs75371622  | 32459470 | T | ADD | 140318 | 1.171  | 5.759  | 8.45E-09 |
| 6 | rs116611418 | 32459595 | G | ADD | 101523 | 0.8396 | -6.816 | 9.35E-12 |
| 6 | rs79238108  | 32459807 | C | ADD | 140387 | 1.171  | 5.732  | 9.94E-09 |
| 6 | rs116587947 | 32459889 | T | ADD | 111063 | 0.8327 | -7.433 | 1.06E-13 |
| 6 | rs114146939 | 32459890 | G | ADD | 111063 | 0.8327 | -7.433 | 1.06E-13 |
| 6 | rs74507717  | 32459917 | G | ADD | 140678 | 1.171  | 5.753  | 8.77E-09 |
| 6 | rs76782015  | 32459937 | T | ADD | 134397 | 1.174  | 5.792  | 6.97E-09 |
| 6 | rs144441217 | 32460025 | G | ADD | 140357 | 1.171  | 5.739  | 9.51E-09 |
| 6 | rs147402766 | 32460027 | G | ADD | 140358 | 1.171  | 5.74   | 9.49E-09 |
| 6 | rs73401361  | 32460045 | G | ADD | 140373 | 1.173  | 5.745  | 9.18E-09 |
| 6 | rs75127169  | 32460082 | G | ADD | 140035 | 1.172  | 5.748  | 9.03E-09 |
| 6 | rs111499705 | 32460116 | A | ADD | 140030 | 1.171  | 5.734  | 9.82E-09 |
| 6 | rs74945164  | 32460447 | A | ADD | 140192 | 1.171  | 5.756  | 8.61E-09 |
| 6 | rs78767260  | 32460491 | A | ADD | 140193 | 1.172  | 5.776  | 7.65E-09 |
| 6 | rs80221542  | 32460512 | T | ADD | 140164 | 1.171  | 5.762  | 8.31E-09 |
| 6 | rs75498325  | 32460514 | C | ADD | 140164 | 1.171  | 5.762  | 8.31E-09 |
| 6 | rs77089552  | 32460533 | A | ADD | 140164 | 1.171  | 5.762  | 8.31E-09 |
| 6 | rs77707664  | 32460541 | G | ADD | 140164 | 1.171  | 5.762  | 8.31E-09 |
| 6 | rs79705649  | 32460549 | T | ADD | 140166 | 1.171  | 5.746  | 9.14E-09 |
| 6 | rs75236519  | 32460670 | C | ADD | 90683  | 0.8273 | -6.986 | 2.82E-12 |
| 6 | rs76753608  | 32460766 | G | ADD | 140073 | 1.17   | 5.734  | 9.81E-09 |
| 6 | rs190915926 | 32464521 | A | ADD | 80691  | 1.258  | 6.089  | 1.14E-09 |
| 6 | rs375383446 | 32468702 | G | ADD | 141995 | 1.175  | 5.888  | 3.92E-09 |
| 6 | rs111543935 | 32468718 | A | ADD | 142033 | 1.176  | 5.877  | 4.17E-09 |
| 6 | rs540780180 | 32468744 | T | ADD | 141989 | 1.174  | 5.877  | 4.18E-09 |
| 6 | rs139032160 | 32468894 | T | ADD | 145403 | 1.173  | 5.817  | 5.98E-09 |
| 6 | rs73731427  | 32468906 | T | ADD | 145403 | 1.173  | 5.816  | 6.04E-09 |
| 6 | rs115084652 | 32468978 | T | ADD | 114175 | 0.8552 | -6.294 | 3.10E-10 |
| 6 | rs116048339 | 32468982 | T | ADD | 114615 | 0.856  | -6.265 | 3.74E-10 |
| 6 | rs116380301 | 32468983 | T | ADD | 114615 | 0.856  | -6.265 | 3.74E-10 |
| 6 | rs74372324  | 32468996 | A | ADD | 143691 | 1.175  | 5.872  | 4.31E-09 |
| 6 | rs144975609 | 32468997 | A | ADD | 115003 | 0.8546 | -6.341 | 2.28E-10 |
| 6 | rs141020324 | 32469001 | A | ADD | 115003 | 0.8546 | -6.341 | 2.28E-10 |
| 6 | rs74197151  | 32469035 | T | ADD | 110728 | 0.8493 | -6.519 | 7.09E-11 |
| 6 | rs74211958  | 32469040 | G | ADD | 110598 | 0.851  | -6.446 | 1.15E-10 |

|   |               |          |   |     |        |        |        |          |          |
|---|---------------|----------|---|-----|--------|--------|--------|----------|----------|
| 6 | rs112457394   | 32469073 | C | ADD | 99745  | 0.8505 | -6.292 | 3.13E-10 |          |
| 6 | rs72849276    | 32469075 | C | ADD | 143118 | 1.175  | 5.872  | 4.30E-09 |          |
| 6 | rs116691706   | 32469222 | C | ADD | 142742 | 1.17   | 5.766  | 8.11E-09 |          |
| 6 | rs77693147    | 32469247 | C | ADD | 142519 | 1.171  | 5.777  | 7.62E-09 |          |
| 6 | rs150643306   | 32469276 | A | G   | ADD    | 96562  | 0.8248 | -7.231   | 4.80E-13 |
| 6 | rs545379090   | 32469285 | T | ADD | 107678 | 0.8503 | -6.447 | 1.14E-10 |          |
| 6 | rs72849282    | 32469335 | T | ADD | 107957 | 0.8513 | -6.392 | 1.64E-10 |          |
| 6 | rs76317804    | 32469375 | T | ADD | 112161 | 0.853  | -6.402 | 1.53E-10 |          |
| 6 | rs75140942    | 32469389 | G | ADD | 142561 | 1.171  | 5.734  | 9.83E-09 |          |
| 6 | rs75519123    | 32469404 | G | ADD | 109275 | 0.848  | -6.584 | 4.58E-11 |          |
| 6 | rs571525080   | 32469429 | A | ADD | 109716 | 0.8497 | -6.51  | 7.53E-11 |          |
| 6 | rs532050307   | 32469431 | C | ADD | 109715 | 0.8497 | -6.509 | 7.54E-11 |          |
| 6 | rs75073083    | 32472471 | C | ADD | 118304 | 1.215  | 6.83   | 8.50E-12 |          |
| 6 | rs75153822    | 32472472 | A | ADD | 118304 | 1.215  | 6.83   | 8.50E-12 |          |
| 6 | rs75393164    | 32472553 | T | ADD | 118467 | 1.214  | 6.807  | 9.97E-12 |          |
| 6 | rs79601710    | 32472593 | A | ADD | 142880 | 1.175  | 5.918  | 3.26E-09 |          |
| 6 | rs75176490    | 32472604 | C | ADD | 142982 | 1.174  | 5.886  | 3.96E-09 |          |
| 6 | rs75427248    | 32472605 | C | ADD | 142982 | 1.174  | 5.886  | 3.96E-09 |          |
| 6 | rs79265816    | 32472664 | A | ADD | 90117  | 1.194  | 6.159  | 7.33E-10 |          |
| 6 | rs75424998    | 32472830 | A | ADD | 140317 | 1.171  | 5.739  | 9.53E-09 |          |
| 6 | rs139038289   | 32472940 | T | ADD | 72262  | 1.226  | 5.963  | 2.48E-09 |          |
| 6 | rs77930301    | 32472943 | T | ADD | 116239 | 1.181  | 5.865  | 4.50E-09 |          |
| 6 | rs113299215   | 32473089 | T | ADD | 104623 | 1.18   | 5.941  | 2.84E-09 |          |
| 6 | rs116274877   | 32473099 | C | ADD | 140694 | 1.172  | 5.776  | 7.63E-09 |          |
| 6 | rs115428791   | 32473101 | A | ADD | 140694 | 1.172  | 5.776  | 7.63E-09 |          |
| 6 | rs116758859   | 32473104 | T | ADD | 140694 | 1.172  | 5.776  | 7.63E-09 |          |
| 6 | rs114561193   | 32473120 | T | ADD | 99584  | 1.183  | 5.922  | 3.19E-09 |          |
|   |               |          | T |     |        |        |        |          |          |
|   |               |          | T |     |        |        |        |          |          |
|   |               |          | T |     |        |        |        |          |          |
|   | 6:32473157_TT |          | A |     |        |        |        |          |          |
| 6 | TAC_T         | 32473157 | C | ADD | 142457 | 1.176  | 5.921  | 3.21E-09 |          |
| 6 | rs111894799   | 32473167 | C | ADD | 142457 | 1.176  | 5.921  | 3.21E-09 |          |
| 6 | rs142633963   | 32473248 | C | ADD | 140568 | 1.17   | 5.742  | 9.38E-09 |          |
| 6 | rs140656634   | 32473259 | G | ADD | 140568 | 1.17   | 5.742  | 9.38E-09 |          |
| 6 | rs72849287    | 32473321 | G | ADD | 142600 | 1.174  | 5.888  | 3.92E-09 |          |
| 6 | rs73403198    | 32473419 | T | ADD | 140580 | 1.173  | 5.756  | 8.63E-09 |          |
| 6 | rs73729750    | 32473503 | G | ADD | 143367 | 1.172  | 5.806  | 6.39E-09 |          |
| 6 | rs113310401   | 32473554 | A | ADD | 143368 | 1.173  | 5.82   | 5.89E-09 |          |
| 6 | rs111344982   | 32473588 | T | ADD | 85730  | 1.23   | 6.599  | 4.13E-11 |          |

|   |             |          |   |     |        |        |        |          |
|---|-------------|----------|---|-----|--------|--------|--------|----------|
| 6 | rs116001816 | 32473686 | G | ADD | 140428 | 1.172  | 5.782  | 7.37E-09 |
| 6 | rs60993360  | 32473694 | A | ADD | 140470 | 1.174  | 5.805  | 6.42E-09 |
| 6 | rs112365225 | 32473740 | G | ADD | 140529 | 1.173  | 5.805  | 6.44E-09 |
| 6 | rs187933457 | 32473756 | C | ADD | 140529 | 1.173  | 5.805  | 6.44E-09 |
| 6 | rs189917865 | 32473758 | G | ADD | 140530 | 1.173  | 5.805  | 6.45E-09 |
| 6 | rs529539073 | 32473776 | T | ADD | 140785 | 1.171  | 5.763  | 8.24E-09 |
| 6 | rs111570293 | 32473792 | T | ADD | 140765 | 1.171  | 5.76   | 8.43E-09 |
| 6 | rs75796665  | 32473799 | T | ADD | 140765 | 1.171  | 5.76   | 8.43E-09 |
| 6 | rs74588093  | 32473810 | G | ADD | 140756 | 1.171  | 5.763  | 8.28E-09 |
| 6 | rs74569570  | 32473816 | C | ADD | 140756 | 1.171  | 5.763  | 8.28E-09 |
| 6 | rs77932560  | 32473832 | C | ADD | 140695 | 1.171  | 5.752  | 8.82E-09 |
| 6 | rs74696032  | 32473866 | A | ADD | 140660 | 1.171  | 5.75   | 8.93E-09 |
| 6 | rs79747029  | 32473889 | C | ADD | 140647 | 1.171  | 5.756  | 8.59E-09 |
| 6 | rs79184871  | 32473972 | A | ADD | 140320 | 1.171  | 5.751  | 8.86E-09 |
| 6 | rs74930081  | 32474088 | C | ADD | 141743 | 1.179  | 6.039  | 1.55E-09 |
| 6 | rs76659340  | 32474090 | G | ADD | 142549 | 1.176  | 5.944  | 2.78E-09 |
| 6 | rs77017079  | 32474095 | C | ADD | 142549 | 1.176  | 5.944  | 2.78E-09 |
| 6 | rs75800703  | 32474096 | T | ADD | 142549 | 1.176  | 5.944  | 2.78E-09 |
| 6 | rs188738201 | 32474550 | T | ADD | 139847 | 1.171  | 5.77   | 7.92E-09 |
| 6 | rs113601089 | 32479182 | T | ADD | 139020 | 1.177  | 5.899  | 3.66E-09 |
| 6 | rs186804046 | 32479321 | C | ADD | 73477  | 0.8166 | -5.939 | 2.86E-09 |
| 6 | rs569725476 | 32479351 | T | ADD | 73425  | 0.8188 | -5.867 | 4.43E-09 |
| 6 | rs558533142 | 32479366 | C | ADD | 73425  | 0.8188 | -5.868 | 4.41E-09 |
| 6 | rs72508421  | 32479491 | T | ADD | 140844 | 1.17   | 5.732  | 9.95E-09 |
| 6 | rs114278921 | 32479544 | A | ADD | 72822  | 0.8166 | -5.839 | 5.24E-09 |
| 6 | rs74428884  | 32479872 | C | ADD | 142888 | 1.172  | 5.808  | 6.34E-09 |
| 6 | rs72849291  | 32479924 | C | ADD | 143014 | 1.172  | 5.815  | 6.07E-09 |
| 6 | rs533688361 | 32480016 | T | ADD | 87550  | 0.8509 | -5.84  | 5.22E-09 |
| 6 | rs185087225 | 32480024 | C | ADD | 87446  | 1.178  | 5.925  | 3.13E-09 |
| 6 | rs114340096 | 32480262 | T | ADD | 143175 | 1.174  | 5.886  | 3.95E-09 |
| 6 | rs112918203 | 32480282 | A | ADD | 142935 | 1.174  | 5.874  | 4.27E-09 |
| 6 | rs112886967 | 32480285 | C | ADD | 143177 | 1.173  | 5.866  | 4.46E-09 |
| 6 | rs58769847  | 32481122 | T | ADD | 112365 | 0.8183 | -8.323 | 8.60E-17 |
| 6 | rs59447698  | 32481125 | G | ADD | 107638 | 0.8227 | -7.641 | 2.16E-14 |
| 6 | rs112582516 | 32481392 | T | ADD | 109136 | 0.8128 | -8.377 | 5.45E-17 |
| 6 | rs72508424  | 32481590 | G | ADD | 142493 | 1.174  | 5.84   | 5.23E-09 |
| 6 | rs112740757 | 32481965 | A | ADD | 88937  | 1.266  | 8.74   | 2.34E-18 |
| 6 | rs113749865 | 32481973 | T | ADD | 88413  | 1.26   | 8.493  | 2.01E-17 |

|   |             |          |   |     |        |        |        |          |
|---|-------------|----------|---|-----|--------|--------|--------|----------|
| 6 | rs12665158  | 32482007 | T | ADD | 92948  | 0.7994 | -8.483 | 2.19E-17 |
| 6 | rs73729756  | 32482020 | G | ADD | 95554  | 0.7957 | -8.789 | 1.51E-18 |
| 6 | rs111823263 | 32482045 | G | ADD | 95457  | 0.7974 | -8.706 | 3.15E-18 |
| 6 | rs111251172 | 32482056 | C | ADD | 140785 | 1.173  | 5.796  | 6.78E-09 |
| 6 | rs148831934 | 32482067 | G | ADD | 140784 | 1.173  | 5.796  | 6.78E-09 |
| 6 | rs192090456 | 32482101 | C | ADD | 108033 | 1.162  | 5.928  | 3.06E-09 |
| 6 | rs146618240 | 32482102 | G | ADD | 106645 | 0.7886 | -9.693 | 3.22E-22 |
| 6 | rs552461365 | 32482115 | C | ADD | 113198 | 0.8212 | -8.194 | 2.52E-16 |
| 6 | rs113147593 | 32482176 | C | ADD | 140788 | 1.17   | 5.739  | 9.53E-09 |
| 6 | rs111874278 | 32482181 | C | ADD | 140781 | 1.17   | 5.737  | 9.66E-09 |
| 6 | rs562851322 | 32482216 | A | ADD | 140594 | 1.173  | 5.811  | 6.22E-09 |
| 6 | rs533509110 | 32482220 | C | ADD | 140594 | 1.173  | 5.811  | 6.22E-09 |
| 6 | rs113506020 | 32482261 | T | ADD | 140648 | 1.171  | 5.742  | 9.36E-09 |
| 6 | rs114716760 | 32482279 | A | ADD | 140649 | 1.171  | 5.74   | 9.46E-09 |
| 6 | rs116360287 | 32482303 | G | ADD | 85925  | 1.279  | 8.695  | 3.46E-18 |
| 6 | rs181549666 | 32482352 | A | ADD | 123154 | 0.8444 | -7.05  | 1.79E-12 |
| 6 | rs556568526 | 32482353 | T | ADD | 127567 | 0.8479 | -6.951 | 3.63E-12 |
| 6 | rs578020847 | 32482368 | C | ADD | 127595 | 0.8479 | -6.952 | 3.61E-12 |
| 6 | rs116473597 | 32482374 | T | ADD | 127595 | 0.8479 | -6.952 | 3.61E-12 |
| 6 | rs115830407 | 32482484 | T | ADD | 82075  | 1.233  | 7.258  | 3.94E-13 |
| 6 | rs112281380 | 32482990 | C | ADD | 138648 | 1.179  | 5.985  | 2.16E-09 |
| 6 | rs112100135 | 32483024 | A | ADD | 138648 | 1.179  | 5.985  | 2.16E-09 |
| 6 | rs145893158 | 32483045 | T | ADD | 138648 | 1.179  | 5.985  | 2.16E-09 |
| 6 | rs112388251 | 32483060 | A | ADD | 138656 | 1.179  | 5.985  | 2.17E-09 |
| 6 | rs79394030  | 32484625 | T | ADD | 138440 | 1.176  | 5.918  | 3.26E-09 |
| 6 | rs76153169  | 32484651 | G | ADD | 138446 | 1.176  | 5.916  | 3.30E-09 |
| 6 | rs62405576  | 32484706 | A | ADD | 140633 | 1.181  | 6.105  | 1.03E-09 |
| 6 | rs113169828 | 32484743 | A | ADD | 140630 | 1.182  | 6.106  | 1.02E-09 |
| 6 | rs190771556 | 32485893 | T | ADD | 66117  | 0.7706 | -6.115 | 9.64E-10 |
| 6 | rs139188913 | 32485921 | A | ADD | 83959  | 0.8194 | -6.616 | 3.68E-11 |
| 6 | rs556705917 | 32486092 | T | ADD | 136780 | 1.176  | 5.918  | 3.26E-09 |
| 6 | rs145238941 | 32486179 | T | ADD | 135680 | 1.18   | 6.005  | 1.91E-09 |
| 6 | rs115328397 | 32486181 | A | ADD | 135679 | 1.18   | 6.006  | 1.91E-09 |
| 6 | rs112269347 | 32486197 | G | ADD | 98042  | 1.188  | 5.921  | 3.21E-09 |
| 6 | rs113242918 | 32486202 | G | ADD | 135705 | 1.181  | 6.051  | 1.44E-09 |
| 6 | rs139672306 | 32486447 | G | ADD | 130850 | 1.177  | 5.849  | 4.94E-09 |
| 6 | rs555503640 | 32486477 | T | ADD | 102802 | 0.8048 | -8.674 | 4.17E-18 |
| 6 | rs114548292 | 32486491 | T | ADD | 137930 | 1.179  | 5.996  | 2.02E-09 |

|   |             |          |   |     |        |        |        |          |
|---|-------------|----------|---|-----|--------|--------|--------|----------|
| 6 | rs188122191 | 32486511 | T | ADD | 137660 | 1.173  | 5.763  | 8.26E-09 |
| 6 | rs116721417 | 32486517 | T | ADD | 137686 | 1.173  | 5.773  | 7.81E-09 |
| 6 | rs111501833 | 32486545 | T | ADD | 138415 | 1.173  | 5.765  | 8.19E-09 |
| 6 | rs547755130 | 32486547 | T | ADD | 90181  | 1.238  | 7.845  | 4.33E-15 |
| 6 | rs565956329 | 32486548 | G | ADD | 90192  | 1.238  | 7.851  | 4.13E-15 |
| 6 | rs116708952 | 32486590 | T | ADD | 90881  | 1.244  | 8.077  | 6.66E-16 |
| 6 | rs142829465 | 32486625 | G | ADD | 138617 | 1.176  | 5.905  | 3.52E-09 |
| 6 | rs147404658 | 32486632 | T | ADD | 138617 | 1.176  | 5.905  | 3.52E-09 |
| 6 | rs116577630 | 32486639 | T | ADD | 138614 | 1.176  | 5.905  | 3.52E-09 |
| 6 | rs187058069 | 32486665 | C | ADD | 84562  | 1.241  | 7.779  | 7.33E-15 |
| 6 | rs115109434 | 32486667 | G | ADD | 138605 | 1.176  | 5.901  | 3.62E-09 |
| 6 | rs535866271 | 32486668 | C | ADD | 88594  | 1.25   | 8.186  | 2.70E-16 |
| 6 | rs113440750 | 32486682 | A | ADD | 138601 | 1.176  | 5.902  | 3.58E-09 |
| 6 | rs143742029 | 32486683 | A | ADD | 92410  | 1.248  | 8.125  | 4.47E-16 |
| 6 | rs150860760 | 32486709 | T | ADD | 81987  | 1.25   | 7.773  | 7.67E-15 |
| 6 | rs539638110 | 32486760 | A | ADD | 135057 | 1.274  | 6.301  | 2.95E-10 |
| 6 | rs138130801 | 32486866 | T | ADD | 74160  | 0.8214 | -6.318 | 2.64E-10 |
| 6 | rs116011937 | 32486884 | G | ADD | 74732  | 0.8223 | -6.302 | 2.95E-10 |
| 6 | rs182976814 | 32486900 | T | ADD | 117877 | 1.273  | 6.391  | 1.65E-10 |
| 6 | rs77052909  | 32487023 | A | ADD | 118067 | 1.188  | 6.027  | 1.67E-09 |
| 6 | rs201958319 | 32487094 | T | ADD | 97501  | 1.202  | 6.289  | 3.20E-10 |
| 6 | rs199855998 | 32487096 | A | ADD | 97098  | 1.205  | 6.37   | 1.90E-10 |
| 6 | rs201850026 | 32487100 | T | ADD | 97426  | 1.2    | 6.237  | 4.46E-10 |
| 6 | rs200254403 | 32487102 | G | ADD | 91193  | 1.221  | 6.731  | 1.68E-11 |
| 6 | rs112872773 | 32487174 | G | ADD | 119318 | 1.228  | 6.002  | 1.95E-09 |
| 6 | rs114293611 | 32487353 | T | ADD | 77086  | 1.188  | 5.784  | 7.32E-09 |
| 6 | rs77180119  | 32487390 | T | ADD | 136361 | 1.173  | 5.759  | 8.46E-09 |
| 6 | rs115198947 | 32487398 | C | ADD | 136361 | 1.173  | 5.759  | 8.46E-09 |
| 6 | rs142795234 | 32487593 | T | ADD | 81690  | 1.184  | 5.744  | 9.25E-09 |
| 6 | rs141114903 | 32487814 | C | ADD | 94739  | 1.279  | 9.385  | 6.29E-21 |
| 6 | rs547797725 | 32487827 | G | ADD | 98337  | 1.262  | 9.133  | 6.69E-20 |
| 6 | rs375309052 | 32487908 | A | ADD | 56571  | 0.7745 | -5.969 | 2.39E-09 |
| 6 | rs73726164  | 32487937 | A | ADD | 56582  | 0.7779 | -5.866 | 4.46E-09 |
| 6 | rs71547391  | 32488685 | A | ADD | 99649  | 1.259  | 8.175  | 2.97E-16 |
| 6 | rs541218925 | 32488717 | A | ADD | 81141  | 1.244  | 7.419  | 1.18E-13 |
| 6 | rs185236820 | 32488776 | T | ADD | 99574  | 0.8048 | -8.64  | 5.63E-18 |
| 6 | rs190526848 | 32488781 | A | ADD | 99571  | 0.8047 | -8.642 | 5.52E-18 |
| 6 | rs140747244 | 32488784 | C | ADD | 98310  | 0.7995 | -8.849 | 8.83E-19 |



|   |             |          |   |     |        |        |        |          |
|---|-------------|----------|---|-----|--------|--------|--------|----------|
| 6 | rs34265294  | 32489118 | A | ADD | 98637  | 0.8148 | -8.086 | 6.15E-16 |
| 6 | rs117090280 | 32489265 | A | ADD | 94207  | 1.226  | 7.857  | 3.92E-15 |
| 6 | rs371747477 | 32489266 | C | ADD | 88325  | 1.232  | 7.71   | 1.26E-14 |
| 6 | rs150598903 | 32489395 | A | ADD | 86476  | 1.201  | 6.695  | 2.16E-11 |
| 6 | rs543993279 | 32489575 | G | ADD | 102871 | 1.255  | 5.897  | 3.70E-09 |
| 6 | rs117108573 | 32489679 | T | ADD | 138142 | 1.286  | 6.371  | 1.88E-10 |
| 6 | rs41559714  | 32489707 | C | ADD | 130258 | 1.277  | 6.284  | 3.30E-10 |
| 6 | rs1136778   | 32489711 | G | ADD | 138697 | 1.276  | 6.189  | 6.06E-10 |
| 6 | rs72508440  | 32489908 | G | ADD | 85585  | 1.209  | 6.501  | 7.95E-11 |
| 6 | rs112326475 | 32489980 | G | ADD | 85803  | 1.222  | 6.862  | 6.79E-12 |
| 6 | rs144901015 | 32489992 | G | ADD | 86689  | 1.221  | 6.923  | 4.41E-12 |
| 6 | rs188812628 | 32489994 | G | ADD | 86689  | 1.221  | 6.923  | 4.41E-12 |
| 6 | rs532143340 | 32490078 | C | ADD | 84873  | 1.189  | 5.918  | 3.27E-09 |
| 6 | rs181494824 | 32490081 | G | ADD | 84873  | 1.189  | 5.918  | 3.27E-09 |
| 6 | rs187653175 | 32490127 | C | ADD | 74647  | 1.215  | 6.401  | 1.54E-10 |
| 6 | rs572264676 | 32490134 | T | ADD | 88419  | 1.211  | 6.912  | 4.80E-12 |
| 6 | rs185320691 | 32490292 | C | ADD | 125614 | 1.263  | 6.18   | 6.41E-10 |
| 6 | rs528723549 | 32490420 | A | ADD | 87697  | 1.209  | 7.083  | 1.41E-12 |
| 6 | rs80177780  | 32490421 | C | ADD | 98386  | 1.186  | 5.861  | 4.60E-09 |
| 6 | rs182191708 | 32490480 | A | ADD | 86343  | 1.234  | 7.73   | 1.08E-14 |
| 6 | rs139910587 | 32490483 | A | ADD | 87837  | 1.231  | 7.717  | 1.19E-14 |
| 6 | rs528638684 | 32490600 | G | ADD | 90423  | 1.238  | 7.823  | 5.15E-15 |
| 6 | rs140849564 | 32490607 | A | ADD | 89546  | 1.246  | 7.817  | 5.41E-15 |
| 6 | rs72508441  | 32490752 | G | ADD | 79992  | 1.204  | 6.255  | 3.96E-10 |
| 6 | rs73726176  | 32490760 | A | ADD | 88049  | 1.22   | 7.262  | 3.81E-13 |
| 6 | rs73726177  | 32490762 | C | ADD | 88049  | 1.22   | 7.262  | 3.81E-13 |
| 6 | rs112140494 | 32490767 | C | ADD | 101354 | 1.306  | 7.012  | 2.35E-12 |
| 6 | rs563226460 | 32490851 | T | ADD | 102462 | 0.8082 | -8.402 | 4.37E-17 |
| 6 | rs551839031 | 32490868 | C | ADD | 140777 | 1.171  | 5.757  | 8.59E-09 |
| 6 | rs566929862 | 32490870 | G | ADD | 140777 | 1.171  | 5.757  | 8.59E-09 |
| 6 | rs534289980 | 32490871 | A | ADD | 140777 | 1.171  | 5.757  | 8.59E-09 |
| 6 | rs116670844 | 32490925 | T | ADD | 89786  | 0.8184 | -7.478 | 7.57E-14 |
| 6 | rs114795116 | 32491112 | T | ADD | 68484  | 0.8073 | -6.429 | 1.28E-10 |
| 6 | rs116787876 | 32491139 | G | ADD | 68218  | 0.8055 | -6.473 | 9.59E-11 |
| 6 | rs143972840 | 32491242 | T | ADD | 84456  | 1.22   | 6.904  | 5.07E-12 |
| 6 | rs115881023 | 32491453 | G | ADD | 139068 | 1.175  | 5.836  | 5.36E-09 |
| 6 | rs73726187  | 32491461 | A | ADD | 139034 | 1.176  | 5.86   | 4.62E-09 |
| 6 | rs112851809 | 32491633 | T | ADD | 70032  | 0.7626 | -8.236 | 1.78E-16 |

|   |             |          |   |     |        |        |        |          |
|---|-------------|----------|---|-----|--------|--------|--------|----------|
| 6 | rs113854881 | 32491732 | G | ADD | 130477 | 1.279  | 6.375  | 1.83E-10 |
| 6 | rs141142229 | 32491805 | C | ADD | 84956  | 0.8182 | -7.04  | 1.92E-12 |
| 6 | rs139195061 | 32491813 | A | ADD | 84957  | 0.8183 | -7.036 | 1.97E-12 |
| 6 | rs115254515 | 32491895 | C | ADD | 98514  | 1.236  | 8.215  | 2.12E-16 |
| 6 | rs116328963 | 32491938 | C | ADD | 84328  | 1.287  | 8.624  | 6.48E-18 |
| 6 | rs145606733 | 32491959 | A | ADD | 98583  | 1.244  | 8.506  | 1.79E-17 |
| 6 | rs111779823 | 32491965 | C | ADD | 98557  | 1.244  | 8.504  | 1.83E-17 |
| 6 | rs549879919 | 32491969 | G | ADD | 92294  | 0.7779 | -9.181 | 4.28E-20 |
| 6 | rs113091576 | 32491986 | C | ADD | 92310  | 0.7774 | -9.204 | 3.44E-20 |
| 6 | rs116711613 | 32492041 | C | ADD | 94267  | 1.232  | 7.964  | 1.66E-15 |
| 6 | rs115814063 | 32492093 | T | ADD | 92480  | 1.247  | 8.211  | 2.19E-16 |
| 6 | rs74223623  | 32492102 | C | ADD | 93740  | 1.244  | 8.188  | 2.65E-16 |
| 6 | rs17210637  | 32492176 | A | ADD | 61653  | 1.236  | 5.988  | 2.12E-09 |
| 6 | rs17204294  | 32492179 | T | ADD | 83142  | 1.223  | 6.679  | 2.40E-11 |
| 6 | rs73726194  | 32492199 | G | ADD | 83197  | 1.222  | 6.654  | 2.85E-11 |
| 6 | rs114780493 | 32492249 | G | ADD | 133216 | 1.287  | 6.548  | 5.84E-11 |
| 6 | rs73726198  | 32492262 | T | ADD | 83792  | 1.226  | 6.782  | 1.19E-11 |
| 6 | rs76784864  | 32492453 | C | ADD | 140740 | 1.174  | 5.849  | 4.95E-09 |
| 6 | rs111823185 | 32492457 | T | ADD | 84468  | 1.205  | 6.442  | 1.18E-10 |
| 6 | rs74655967  | 32492468 | G | ADD | 140739 | 1.174  | 5.849  | 4.95E-09 |
| 6 | rs76415507  | 32492589 | T | ADD | 94865  | 1.287  | 9.599  | 8.11E-22 |
| 6 | rs73726200  | 32492592 | A | ADD | 140755 | 1.173  | 5.827  | 5.63E-09 |
| 6 | rs201844955 | 32492907 | T | ADD | 110916 | 1.205  | 6.324  | 2.54E-10 |
| 6 | rs532180052 | 32492929 | C | ADD | 110915 | 1.208  | 6.386  | 1.70E-10 |
| 6 | rs140209363 | 32492971 | C | ADD | 104643 | 0.8423 | -6.786 | 1.16E-11 |
| 6 | rs570284595 | 32493008 | A | ADD | 141134 | 1.175  | 5.882  | 4.06E-09 |
| 6 | rs537372552 | 32493009 | A | ADD | 141134 | 1.175  | 5.882  | 4.06E-09 |
| 6 | rs58427731  | 32493017 | C | ADD | 141051 | 1.178  | 5.91   | 3.42E-09 |
| 6 | rs570494819 | 32493038 | A | ADD | 141112 | 1.174  | 5.872  | 4.31E-09 |
| 6 | rs371337007 | 32493146 | G | ADD | 82234  | 1.195  | 5.792  | 6.95E-09 |
| 6 | rs543726509 | 32493208 | A | ADD | 95887  | 0.8368 | -6.75  | 1.48E-11 |
| 6 | rs531043234 | 32493428 | C | ADD | 88612  | 0.7753 | -8.388 | 4.96E-17 |
| 6 | rs199973717 | 32493600 | A | ADD | 87253  | 1.197  | 6.472  | 9.69E-11 |
| 6 | rs34328528  | 32493811 | C | ADD | 122428 | 1.309  | 7.157  | 8.23E-13 |
| 6 | rs112861810 | 32494029 | T | ADD | 88689  | 1.215  | 7.087  | 1.37E-12 |
| 6 | rs112560257 | 32494038 | C | ADD | 86752  | 1.238  | 5.906  | 3.51E-09 |
| 6 | rs574714830 | 32494119 | G | ADD | 81050  | 1.226  | 7.002  | 2.52E-12 |
| 6 | rs182336149 | 32494269 | C | ADD | 84743  | 1.187  | 5.935  | 2.94E-09 |

|   |               |          |   |     |        |        |        |          |
|---|---------------|----------|---|-----|--------|--------|--------|----------|
| 6 | rs117616320   | 32494704 | A | ADD | 81977  | 0.8136 | -6.322 | 2.59E-10 |
| 6 | rs200786989   | 32494716 | C | ADD | 76299  | 1.207  | 6.063  | 1.34E-09 |
| 6 | rs200248344   | 32494937 | C | ADD | 142826 | 1.174  | 5.847  | 5.01E-09 |
| 6 | rs530613608   | 32495889 | T | ADD | 71316  | 0.8176 | -6.061 | 1.35E-09 |
| 6 | rs115711695   | 32495994 | A | ADD | 113798 | 0.8107 | -8.591 | 8.60E-18 |
| 6 | rs73727909    | 32496036 | T | ADD | 110898 | 0.8253 | -7.748 | 9.33E-15 |
| 6 | rs112507860   | 32496083 | T | ADD | 119305 | 0.8115 | -8.984 | 2.61E-19 |
| 6 | rs202075303   | 32496326 | T | ADD | 109370 | 0.8409 | -6.6   | 4.12E-11 |
| 6 | rs561942189   | 32496432 | G | ADD | 116713 | 0.8068 | -9.113 | 7.99E-20 |
| 6 | rs374248993   | 32496534 | C | ADD | 111131 | 0.8348 | -7.286 | 3.20E-13 |
| 6 | rs554443954   | 32496557 | T | ADD | 117403 | 0.8361 | -7.448 | 9.46E-14 |
| 6 | rs141631850   | 32496670 | A | ADD | 83945  | 1.221  | 6.892  | 5.49E-12 |
| 6 | rs140028862   | 32496684 | C | ADD | 83369  | 1.234  | 7.012  | 2.35E-12 |
| 6 | rs145528327   | 32496685 | A | ADD | 83369  | 1.234  | 7.012  | 2.35E-12 |
| 6 | rs373964410   | 32497086 | C | ADD | 87075  | 1.201  | 6.503  | 7.87E-11 |
| 6 | rs368127976   | 32497090 | T | ADD | 99253  | 1.212  | 6.427  | 1.30E-10 |
| 6 | rs572123865   | 32497098 | G | ADD | 87090  | 1.201  | 6.503  | 7.89E-11 |
| 6 | rs554894601   | 32497146 | C | ADD | 95071  | 1.244  | 8.248  | 1.62E-16 |
| 6 | rs112138727   | 32497169 | G | ADD | 89467  | 0.8328 | -6.459 | 1.05E-10 |
| 6 | rs76270534    | 32497232 | G | ADD | 119345 | 1.168  | 6.309  | 2.82E-10 |
| 6 | rs552507937   | 32497354 | A | ADD | 136807 | 0.8568 | -6.716 | 1.87E-11 |
| 6 | rs570739482   | 32497356 | C | ADD | 136807 | 0.8568 | -6.716 | 1.87E-11 |
| 6 | rs535043779   | 32497358 | A | ADD | 136807 | 0.8568 | -6.716 | 1.87E-11 |
| 6 | rs148451580   | 32498626 | A | ADD | 108088 | 0.8072 | -8.371 | 5.73E-17 |
| 6 | rs61433897    | 32498787 | T | ADD | 108903 | 1.239  | 7.593  | 3.12E-14 |
| 6 | rs7771596     | 32498881 | G | ADD | 145875 | 1.176  | 5.9    | 3.63E-09 |
| 6 | rs78569932    | 32498885 | T | ADD | 145876 | 1.176  | 5.901  | 3.62E-09 |
| 6 | rs183703563   | 32498913 | A | ADD | 126469 | 0.8608 | -5.824 | 5.75E-09 |
| 6 | 6:32498931_G_ |          |   |     |        |        |        |          |
| 6 | A             | 32498931 | A | ADD | 114104 | 0.8409 | -7.176 | 7.19E-13 |
| 6 | rs546033671   | 32498932 | G | ADD | 111743 | 0.8532 | -5.921 | 3.20E-09 |
| 6 | rs148612288   | 32498953 | G | ADD | 111669 | 0.8537 | -5.896 | 3.72E-09 |
| 6 | rs115724954   | 32498958 | G | ADD | 141952 | 1.175  | 5.916  | 3.30E-09 |
| 6 | rs114164610   | 32498960 | G | ADD | 144445 | 1.17   | 5.787  | 7.18E-09 |
| 6 | rs113620044   | 32498980 | G | ADD | 144438 | 1.171  | 5.837  | 5.30E-09 |
| 6 | rs147478643   | 32499006 | G | ADD | 144382 | 1.173  | 5.899  | 3.65E-09 |
| 6 | rs140006648   | 32499015 | T | ADD | 142635 | 1.172  | 5.858  | 4.69E-09 |
| 6 | rs111359734   | 32499033 | A | ADD | 144517 | 1.176  | 5.968  | 2.41E-09 |
| 6 | rs149189956   | 32499047 | C | ADD | 144516 | 1.176  | 5.968  | 2.40E-09 |

|   |             |          |   |     |        |        |        |          |
|---|-------------|----------|---|-----|--------|--------|--------|----------|
| 6 | rs146130478 | 32499213 | C | ADD | 115278 | 1.174  | 6.528  | 6.66E-11 |
| 6 | rs78247055  | 32499214 | A | ADD | 146722 | 1.172  | 5.822  | 5.83E-09 |
| 6 | rs138961230 | 32499244 | C | ADD | 146865 | 1.175  | 5.878  | 4.16E-09 |
| 6 | rs186325882 | 32499990 | A | ADD | 135448 | 0.8517 | -6.744 | 1.55E-11 |
| 6 | rs182771482 | 32500178 | C | ADD | 130904 | 0.843  | -6.927 | 4.29E-12 |
| 6 | rs187316544 | 32500462 | C | ADD | 109223 | 0.8122 | -6.605 | 3.97E-11 |
| 6 | rs190614023 | 32500626 | G | ADD | 106733 | 0.826  | -6.254 | 4.00E-10 |
| 6 | rs149589923 | 32500818 | A | ADD | 133901 | 0.852  | -7.016 | 2.28E-12 |
| 6 | rs184358099 | 32500832 | G | ADD | 133894 | 0.852  | -7.019 | 2.24E-12 |
| 6 | rs11965298  | 32500923 | G | ADD | 133782 | 0.8522 | -7.014 | 2.32E-12 |
| 6 | rs113528607 | 32500928 | G | ADD | 132611 | 1.156  | 6.331  | 2.44E-10 |
| 6 | rs78745522  | 32500941 | A | ADD | 146675 | 1.17   | 5.764  | 8.23E-09 |
| 6 | rs115654776 | 32501015 | T | ADD | 146666 | 1.17   | 5.774  | 7.73E-09 |
| 6 | rs79076469  | 32501124 | A | ADD | 146473 | 1.172  | 5.815  | 6.07E-09 |
| 6 | rs76209082  | 32501127 | C | ADD | 146470 | 1.176  | 5.884  | 4.01E-09 |
| 6 | rs2157337   | 32501144 | T | ADD | 110846 | 0.835  | -6.25  | 4.11E-10 |
| 6 | rs113972770 | 32501169 | C | ADD | 145643 | 1.178  | 5.964  | 2.47E-09 |
| 6 | rs71549248  | 32501196 | C | ADD | 145464 | 1.174  | 5.891  | 3.83E-09 |
| 6 | rs2187821   | 32501204 | T | ADD | 140968 | 0.8534 | -7.029 | 2.08E-12 |
| 6 | rs111379218 | 32501211 | A | ADD | 145558 | 1.172  | 5.856  | 4.75E-09 |
| 6 | rs73727927  | 32501214 | G | ADD | 139256 | 0.8073 | -9.953 | 2.45E-23 |
| 6 | rs74205903  | 32501249 | C | ADD | 143575 | 0.8525 | -7.139 | 9.37E-13 |
| 6 | rs115303308 | 32501296 | A | ADD | 133515 | 0.8534 | -6.929 | 4.25E-12 |
| 6 | rs80029685  | 32501300 | G | ADD | 146587 | 1.177  | 6.021  | 1.73E-09 |
| 6 | rs114831840 | 32501301 | C | ADD | 133583 | 0.8522 | -6.98  | 2.95E-12 |
| 6 | rs115202951 | 32501311 | T | ADD | 133399 | 0.8521 | -6.988 | 2.79E-12 |
| 6 | rs67851010  | 32501347 | G | ADD | 128196 | 1.166  | 5.77   | 7.91E-09 |
| 6 | rs72851020  | 32501393 | C | ADD | 146788 | 1.175  | 5.95   | 2.69E-09 |
| 6 | rs112155110 | 32501417 | T | ADD | 116229 | 0.8605 | -6.186 | 6.16E-10 |
| 6 | rs74738572  | 32501420 | G | ADD | 147641 | 1.172  | 5.843  | 5.13E-09 |
| 6 | rs74485644  | 32501421 | T | ADD | 132576 | 0.8526 | -6.965 | 3.30E-12 |
| 6 | rs72851025  | 32501459 | C | ADD | 130661 | 0.8578 | -6.642 | 3.09E-11 |
| 6 | rs112709345 | 32501541 | T | ADD | 116917 | 0.8689 | -5.809 | 6.27E-09 |
| 6 | rs72851028  | 32501615 | A | ADD | 132792 | 0.8532 | -6.944 | 3.80E-12 |
| 6 | rs72851029  | 32501639 | T | ADD | 114325 | 0.864  | -5.982 | 2.21E-09 |
| 6 | rs66583884  | 32501652 | G | ADD | 147668 | 1.172  | 5.836  | 5.34E-09 |
| 6 | rs34481656  | 32501664 | G | ADD | 131236 | 1.153  | 6.177  | 6.53E-10 |
| 6 | rs115712701 | 32501737 | C | ADD | 132946 | 0.8525 | -6.984 | 2.88E-12 |

|   |             |          |   |     |        |        |        |          |
|---|-------------|----------|---|-----|--------|--------|--------|----------|
| 6 | rs28453305  | 32501842 | G | ADD | 147680 | 1.172  | 5.843  | 5.12E-09 |
| 6 | rs72851044  | 32501886 | A | ADD | 132890 | 0.8514 | -7.038 | 1.95E-12 |
| 6 | rs66738149  | 32501898 | C | ADD | 132942 | 0.8519 | -7.015 | 2.30E-12 |
| 6 | rs74221689  | 32501936 | A | ADD | 141043 | 0.8561 | -6.936 | 4.04E-12 |
| 6 | rs72851046  | 32501957 | G | ADD | 141054 | 0.8563 | -6.927 | 4.31E-12 |
| 6 | rs72851047  | 32501962 | T | ADD | 141054 | 0.8563 | -6.927 | 4.31E-12 |
| 6 | rs5016923   | 32502028 | G | ADD | 145576 | 0.8562 | -7.01  | 2.38E-12 |
| 6 | rs74937819  | 32502037 | A | ADD | 145574 | 0.8563 | -7.008 | 2.42E-12 |
| 6 | rs116316731 | 32502097 | T | ADD | 145343 | 0.8545 | -7.086 | 1.38E-12 |
| 6 | rs114987387 | 32502131 | G | ADD | 145361 | 0.8545 | -7.089 | 1.36E-12 |
| 6 | rs72851052  | 32502249 | T | ADD | 148783 | 0.8569 | -7.016 | 2.28E-12 |
| 6 | rs72851053  | 32502250 | G | ADD | 147636 | 0.857  | -6.991 | 2.73E-12 |
| 6 | rs111626267 | 32502273 | T | ADD | 147368 | 0.8566 | -7.005 | 2.48E-12 |
| 6 | rs115573660 | 32502277 | A | ADD | 147368 | 0.8566 | -7.005 | 2.48E-12 |
| 6 | rs75802832  | 32502295 | C | ADD | 147020 | 1.17   | 5.766  | 8.13E-09 |
| 6 | rs115910196 | 32502304 | T | ADD | 143732 | 0.8565 | -6.896 | 5.35E-12 |
| 6 | rs78182729  | 32502322 | T | ADD | 143120 | 1.137  | 5.988  | 2.13E-09 |
| 6 | rs79881121  | 32502324 | A | ADD | 143358 | 0.8119 | -9.846 | 7.11E-23 |
| 6 | rs75509903  | 32502337 | A | ADD | 147010 | 1.17   | 5.774  | 7.74E-09 |
| 6 | rs7765211   | 32502346 | A | ADD | 133068 | 0.839  | -6.021 | 1.73E-09 |
| 6 | rs115104630 | 32502387 | A | ADD | 143963 | 0.8526 | -7.081 | 1.43E-12 |
| 6 | rs74816744  | 32502447 | A | ADD | 147088 | 1.171  | 5.81   | 6.26E-09 |
| 6 | rs79076719  | 32502455 | C | ADD | 147088 | 1.171  | 5.81   | 6.26E-09 |
| 6 | rs75310651  | 32502513 | A | ADD | 147051 | 1.17   | 5.777  | 7.59E-09 |
| 6 | rs75085141  | 32502522 | T | ADD | 147063 | 1.17   | 5.761  | 8.35E-09 |
| 6 | rs74202712  | 32502546 | G | ADD | 141352 | 0.8569 | -6.832 | 8.38E-12 |
| 6 | rs74211571  | 32502566 | T | ADD | 140060 | 0.8555 | -6.892 | 5.49E-12 |
| 6 | rs74929336  | 32502585 | A | ADD | 138961 | 1.137  | 5.843  | 5.13E-09 |
| 6 | rs76940575  | 32502590 | C | ADD | 140042 | 0.8556 | -6.885 | 5.78E-12 |
| 6 | rs72508463  | 32502617 | A | ADD | 147211 | 1.171  | 5.817  | 6.01E-09 |
| 6 | rs74207695  | 32502631 | C | ADD | 142207 | 0.8543 | -6.942 | 3.87E-12 |
| 6 | rs75872455  | 32502638 | C | ADD | 141963 | 1.133  | 5.794  | 6.86E-09 |
| 6 | rs562045282 | 32502681 | T | ADD | 141924 | 0.8579 | -6.738 | 1.61E-11 |
| 6 | rs74197584  | 32502717 | T | ADD | 141820 | 0.8563 | -6.818 | 9.26E-12 |
| 6 | rs550643609 | 32502794 | A | ADD | 142316 | 0.8527 | -7.017 | 2.27E-12 |
| 6 | rs72851055  | 32502814 | C | ADD | 141013 | 0.8532 | -6.969 | 3.19E-12 |
| 6 | rs79338946  | 32502822 | T | ADD | 129547 | 0.8385 | -5.866 | 4.45E-09 |
| 6 | rs545949191 | 32502900 | A | ADD | 135873 | 0.8558 | -6.82  | 9.10E-12 |

|   |             |          |   |     |        |        |        |          |
|---|-------------|----------|---|-----|--------|--------|--------|----------|
| 6 | rs113787140 | 32502901 | T | ADD | 135533 | 1.23   | 9.49   | 2.32E-21 |
| 6 | rs72851056  | 32502944 | A | ADD | 131005 | 0.8617 | -6.459 | 1.06E-10 |
| 6 | rs112349327 | 32502948 | A | ADD | 130996 | 0.8619 | -6.448 | 1.13E-10 |
| 6 | rs114198395 | 32502961 | T | ADD | 129769 | 0.8663 | -6.201 | 5.60E-10 |
| 6 | rs201439475 | 32502968 | A | ADD | 129774 | 0.8673 | -6.155 | 7.52E-10 |
| 6 | rs115663137 | 32502992 | C | ADD | 129624 | 0.8652 | -6.25  | 4.10E-10 |
| 6 | rs115380393 | 32503020 | T | ADD | 130129 | 0.8553 | -6.721 | 1.81E-11 |
| 6 | rs71549270  | 32503039 | A | ADD | 146854 | 1.171  | 5.811  | 6.21E-09 |
| 6 | rs71549271  | 32503050 | G | ADD | 146854 | 1.171  | 5.811  | 6.21E-09 |
| 6 | rs116609655 | 32503059 | C | ADD | 129980 | 0.8551 | -6.676 | 2.46E-11 |
| 6 | rs111247469 | 32503071 | T | ADD | 120932 | 1.189  | 6.776  | 1.23E-11 |
| 6 | rs544527733 | 32503091 | T | ADD | 131172 | 0.8515 | -6.884 | 5.82E-12 |
| 6 | rs71549272  | 32503154 | A | ADD | 128128 | 1.165  | 5.775  | 7.69E-09 |
| 6 | rs113096063 | 32503161 | T | ADD | 126920 | 1.159  | 6.217  | 5.08E-10 |
| 6 | rs113351668 | 32503167 | A | ADD | 126937 | 1.159  | 6.211  | 5.26E-10 |
| 6 | rs115726960 | 32503171 | A | ADD | 130448 | 0.8521 | -6.932 | 4.14E-12 |
| 6 | rs111897614 | 32503177 | T | ADD | 126967 | 1.159  | 6.209  | 5.32E-10 |
| 6 | rs115077688 | 32503287 | T | ADD | 130200 | 0.8509 | -6.977 | 3.01E-12 |
| 6 | rs116132127 | 32503328 | A | ADD | 133753 | 0.8515 | -6.95  | 3.66E-12 |
| 6 | rs531982544 | 32503334 | C | ADD | 133264 | 0.8519 | -6.907 | 4.94E-12 |
| 6 | rs115878723 | 32503335 | A | ADD | 133260 | 0.852  | -6.9   | 5.20E-12 |
| 6 | rs78294251  | 32503336 | A | ADD | 133453 | 1.146  | 6.045  | 1.49E-09 |
| 6 | rs547409849 | 32503365 | T | ADD | 132247 | 0.8519 | -6.873 | 6.31E-12 |
| 6 | rs75658193  | 32503375 | A | ADD | 132472 | 1.14   | 5.754  | 8.74E-09 |
| 6 | rs116225018 | 32503380 | C | ADD | 132372 | 0.8517 | -6.884 | 5.83E-12 |
| 6 | rs78806801  | 32503403 | C | ADD | 132379 | 0.8515 | -6.894 | 5.44E-12 |
| 6 | rs116133469 | 32503492 | G | ADD | 132506 | 0.8551 | -6.768 | 1.31E-11 |
| 6 | rs115095329 | 32503497 | A | ADD | 132701 | 0.8541 | -6.82  | 9.11E-12 |
| 6 | rs76034941  | 32503498 | C | ADD | 132701 | 0.8541 | -6.82  | 9.11E-12 |
| 6 | rs114653292 | 32503516 | G | ADD | 139578 | 0.8574 | -6.768 | 1.31E-11 |
| 6 | rs114821537 | 32503522 | G | ADD | 139597 | 0.8566 | -6.809 | 9.84E-12 |
| 6 | rs115296342 | 32503526 | C | ADD | 139563 | 0.8561 | -6.831 | 8.42E-12 |
| 6 | rs72851060  | 32503560 | G | ADD | 138788 | 0.8563 | -6.829 | 8.55E-12 |
| 6 | rs79293578  | 32503561 | T | ADD | 137864 | 1.137  | 5.792  | 6.95E-09 |
| 6 | rs115524254 | 32503565 | C | ADD | 139349 | 0.8541 | -6.961 | 3.39E-12 |
| 6 | rs77339454  | 32503567 | A | ADD | 138051 | 1.14   | 5.914  | 3.34E-09 |
| 6 | rs75744841  | 32503575 | C | ADD | 147312 | 1.172  | 5.836  | 5.35E-09 |
| 6 | rs77734842  | 32503641 | A | ADD | 147317 | 1.171  | 5.81   | 6.24E-09 |

|   |             |          |   |     |        |        |        |          |
|---|-------------|----------|---|-----|--------|--------|--------|----------|
| 6 | rs112177836 | 32503658 | A | ADD | 127600 | 1.161  | 6.347  | 2.20E-10 |
| 6 | rs72851061  | 32503672 | C | ADD | 128453 | 0.8478 | -7.093 | 1.31E-12 |
| 6 | rs80141235  | 32503689 | A | ADD | 146106 | 1.171  | 5.791  | 6.99E-09 |
| 6 | rs75730517  | 32503697 | A | ADD | 130267 | 1.158  | 6.385  | 1.72E-10 |
| 6 | rs538879571 | 32503698 | A | ADD | 129716 | 0.8505 | -6.952 | 3.61E-12 |
| 6 | rs114682516 | 32503702 | C | ADD | 130617 | 0.85   | -6.985 | 2.85E-12 |
| 6 | rs79591888  | 32503704 | A | ADD | 131165 | 1.156  | 6.316  | 2.69E-10 |
| 6 | rs116103612 | 32503716 | A | ADD | 140439 | 0.8573 | -6.774 | 1.25E-11 |
| 6 | rs114629945 | 32503717 | G | ADD | 140438 | 0.8573 | -6.775 | 1.25E-11 |
| 6 | rs73727940  | 32503738 | T | ADD | 140598 | 0.8513 | -7.113 | 1.13E-12 |
| 6 | rs35874713  | 32503771 | G | ADD | 146912 | 1.17   | 5.758  | 8.51E-09 |
| 6 | rs78992700  | 32503806 | A | ADD | 146945 | 1.171  | 5.797  | 6.73E-09 |
| 6 | rs75802100  | 32503825 | T | ADD | 146919 | 1.17   | 5.767  | 8.08E-09 |
| 6 | rs80235202  | 32503831 | G | ADD | 123335 | 1.194  | 7.078  | 1.46E-12 |
| 6 | rs113017160 | 32503834 | G | ADD | 134061 | 0.851  | -7.003 | 2.51E-12 |
| 6 | rs114302967 | 32503839 | C | ADD | 132925 | 0.8541 | -6.812 | 9.62E-12 |
| 6 | rs76054694  | 32503840 | T | ADD | 134031 | 0.8513 | -6.983 | 2.89E-12 |
| 6 | rs76662624  | 32503880 | A | ADD | 134175 | 0.8499 | -7.09  | 1.34E-12 |
| 6 | rs113900769 | 32503887 | T | ADD | 134178 | 0.8511 | -7.033 | 2.02E-12 |
| 6 | rs72851063  | 32503901 | T | ADD | 130148 | 0.8493 | -7.049 | 1.80E-12 |
| 6 | rs74323244  | 32503921 | C | ADD | 129000 | 1.157  | 6.253  | 4.03E-10 |
| 6 | rs72851064  | 32503928 | C | ADD | 129677 | 0.8474 | -7.135 | 9.71E-13 |
| 6 | rs77048791  | 32503986 | T | ADD | 129979 | 1.153  | 6.138  | 8.36E-10 |
| 6 | rs67894469  | 32504015 | A | ADD | 147222 | 1.17   | 5.774  | 7.74E-09 |
| 6 | rs71549276  | 32504030 | A | ADD | 147220 | 1.17   | 5.772  | 7.82E-09 |
| 6 | rs71549277  | 32504035 | T | ADD | 145089 | 1.173  | 5.844  | 5.09E-09 |
| 6 | rs114840252 | 32504071 | T | ADD | 144140 | 0.8581 | -6.819 | 9.19E-12 |
| 6 | rs79604868  | 32504073 | A | ADD | 143951 | 0.8609 | -6.664 | 2.66E-11 |
| 6 | rs79364663  | 32504085 | C | ADD | 144269 | 0.8584 | -6.808 | 9.87E-12 |
| 6 | rs75174683  | 32504101 | G | ADD | 144436 | 0.8574 | -6.86  | 6.88E-12 |
| 6 | rs112815590 | 32504110 | T | ADD | 144594 | 0.8577 | -6.854 | 7.20E-12 |
| 6 | rs67342079  | 32504133 | G | ADD | 146778 | 1.17   | 5.755  | 8.66E-09 |
| 6 | rs66514134  | 32504179 | A | ADD | 146771 | 1.169  | 5.746  | 9.12E-09 |
| 6 | rs72851065  | 32504213 | T | ADD | 131998 | 0.8523 | -6.926 | 4.32E-12 |
| 6 | rs72851066  | 32504216 | T | ADD | 131998 | 0.8523 | -6.926 | 4.32E-12 |
| 6 | rs72508464  | 32504341 | T | ADD | 132692 | 0.8517 | -6.98  | 2.96E-12 |
| 6 | rs78994392  | 32504362 | T | ADD | 132732 | 0.8515 | -6.988 | 2.78E-12 |
| 6 | rs116405199 | 32504367 | T | ADD | 132732 | 0.8515 | -6.988 | 2.78E-12 |

|   |             |          |   |     |        |        |        |          |
|---|-------------|----------|---|-----|--------|--------|--------|----------|
| 6 | rs115744566 | 32504372 | T | ADD | 147306 | 1.173  | 5.866  | 4.46E-09 |
| 6 | rs72851070  | 32504395 | G | ADD | 147301 | 1.173  | 5.865  | 4.49E-09 |
| 6 | rs546636941 | 32504421 | T | ADD | 130495 | 0.8518 | -6.887 | 5.70E-12 |
| 6 | rs116520213 | 32504424 | T | ADD | 130495 | 0.8518 | -6.887 | 5.70E-12 |
| 6 | rs557288207 | 32504452 | T | ADD | 131105 | 0.8542 | -6.775 | 1.25E-11 |
| 6 | rs115696138 | 32504460 | C | ADD | 130714 | 0.8541 | -6.773 | 1.26E-11 |
| 6 | rs116422126 | 32504500 | G | ADD | 130266 | 0.856  | -6.666 | 2.63E-11 |
| 6 | rs114362560 | 32504503 | A | ADD | 130266 | 0.856  | -6.666 | 2.63E-11 |
| 6 | rs76509141  | 32504529 | C | ADD | 128316 | 0.8533 | -6.766 | 1.33E-11 |
| 6 | rs71549279  | 32504585 | T | ADD | 147305 | 1.172  | 5.821  | 5.83E-09 |
| 6 | rs530662953 | 32504587 | C | ADD | 130037 | 0.8528 | -6.86  | 6.88E-12 |
| 6 | rs72851077  | 32504624 | C | ADD | 130119 | 0.8541 | -6.796 | 1.08E-11 |
| 6 | rs67388151  | 32504700 | T | ADD | 147223 | 1.17   | 5.761  | 8.35E-09 |
| 6 | rs199506689 | 32504701 | T | ADD | 132988 | 0.8489 | -7.11  | 1.16E-12 |
| 6 | rs73727944  | 32504713 | T | ADD | 132779 | 0.8499 | -7.057 | 1.71E-12 |
| 6 | rs67529500  | 32504757 | C | ADD | 140285 | 0.8534 | -6.906 | 5.00E-12 |
| 6 | rs62405584  | 32504801 | T | ADD | 147320 | 1.172  | 5.845  | 5.06E-09 |
| 6 | rs75088009  | 32504884 | G | ADD | 140266 | 0.8549 | -6.929 | 4.25E-12 |
| 6 | rs62405587  | 32504965 | C | ADD | 147284 | 1.171  | 5.797  | 6.75E-09 |
| 6 | rs73727946  | 32504967 | C | ADD | 140414 | 0.8636 | -6.442 | 1.18E-10 |
| 6 | rs72508465  | 32505141 | T | ADD | 139841 | 0.8547 | -6.888 | 5.67E-12 |
| 6 | rs72508466  | 32505166 | G | ADD | 141860 | 0.8571 | -6.798 | 1.06E-11 |
| 6 | rs200819822 | 32505189 | G | ADD | 141668 | 0.8573 | -6.786 | 1.15E-11 |
| 6 | rs114327439 | 32505202 | A | ADD | 141540 | 0.8574 | -6.781 | 1.19E-11 |
| 6 | rs114084676 | 32505216 | C | ADD | 134970 | 0.8577 | -6.683 | 2.34E-11 |
| 6 | rs75876652  | 32505224 | T | ADD | 126242 | 1.149  | 5.842  | 5.16E-09 |
| 6 | rs115010442 | 32505229 | C | ADD | 134979 | 0.8579 | -6.683 | 2.34E-11 |
| 6 | rs74498391  | 32505267 | C | ADD | 128543 | 1.145  | 5.782  | 7.40E-09 |
| 6 | rs67515384  | 32505271 | A | ADD | 136513 | 0.8578 | -6.709 | 1.97E-11 |
| 6 | rs72508468  | 32505288 | C | ADD | 136842 | 0.8574 | -6.736 | 1.63E-11 |
| 6 | rs79136305  | 32505292 | G | ADD | 128765 | 1.145  | 5.773  | 7.80E-09 |
| 6 | rs72508469  | 32505309 | C | ADD | 144581 | 0.8636 | -6.541 | 6.11E-11 |
| 6 | rs571341495 | 32505326 | G | ADD | 143913 | 0.8643 | -6.487 | 8.76E-11 |
| 6 | rs538727527 | 32505332 | T | ADD | 144013 | 0.8635 | -6.525 | 6.80E-11 |
| 6 | rs553897781 | 32505335 | A | ADD | 144024 | 0.8634 | -6.53  | 6.59E-11 |
| 6 | rs77413629  | 32505374 | G | ADD | 141818 | 0.8575 | -6.745 | 1.53E-11 |
| 6 | rs183777110 | 32505375 | T | ADD | 141818 | 0.8575 | -6.745 | 1.53E-11 |
| 6 | rs544548886 | 32505381 | T | ADD | 141853 | 0.8585 | -6.698 | 2.11E-11 |



|   |             |          |   |     |        |        |        |          |
|---|-------------|----------|---|-----|--------|--------|--------|----------|
| 6 | rs150117381 | 32505388 | C | ADD | 141850 | 0.8579 | -6.729 | 1.71E-11 |
| 6 | rs115673628 | 32505419 | G | ADD | 141541 | 0.8571 | -6.757 | 1.41E-11 |
| 6 | rs72851099  | 32505508 | C | ADD | 147280 | 1.171  | 5.791  | 6.99E-09 |
| 6 | rs72851100  | 32505511 | C | ADD | 135943 | 0.8536 | -6.917 | 4.60E-12 |
| 6 | rs72853904  | 32505575 | T | ADD | 124310 | 0.8424 | -7.377 | 1.62E-13 |
| 6 | rs7743846   | 32505600 | C | ADD | 135668 | 0.8517 | -7.003 | 2.51E-12 |
| 6 | rs72853905  | 32505609 | A | ADD | 146787 | 1.171  | 5.794  | 6.87E-09 |
| 6 | rs376217655 | 32505666 | T | ADD | 140453 | 0.8609 | -6.529 | 6.61E-11 |
| 6 | rs79010350  | 32505668 | G | ADD | 146656 | 1.17   | 5.772  | 7.83E-09 |
| 6 | rs28568890  | 32505767 | G | ADD | 147175 | 1.174  | 5.827  | 5.66E-09 |
| 6 | rs114034298 | 32505797 | C | ADD | 138917 | 0.858  | -6.684 | 2.33E-11 |
| 6 | rs193201719 | 32505807 | T | ADD | 138837 | 0.859  | -6.634 | 3.26E-11 |
| 6 | rs550051341 | 32505851 | C | ADD | 139712 | 0.8591 | -6.622 | 3.55E-11 |
| 6 | rs571586981 | 32505852 | A | ADD | 139712 | 0.8591 | -6.622 | 3.55E-11 |
| 6 | rs185520080 | 32505872 | C | ADD | 140524 | 0.8572 | -6.739 | 1.59E-11 |
| 6 | rs72853910  | 32505875 | C | ADD | 146715 | 1.17   | 5.763  | 8.28E-09 |
| 6 | rs78912960  | 32505908 | G | ADD | 146625 | 1.169  | 5.749  | 8.97E-09 |
| 6 | rs77375484  | 32505909 | T | ADD | 146625 | 1.169  | 5.749  | 8.97E-09 |
| 6 | rs142526177 | 32505944 | G | ADD | 143996 | 0.8194 | -6.551 | 5.73E-11 |
| 6 | rs113333416 | 32506627 | C | ADD | 146840 | 1.169  | 5.755  | 8.68E-09 |
| 6 | rs76612829  | 32506695 | G | ADD | 146848 | 1.169  | 5.734  | 9.79E-09 |
| 6 | rs116241189 | 32506751 | A | ADD | 137158 | 0.855  | -6.841 | 7.89E-12 |
| 6 | rs72853911  | 32506759 | G | ADD | 137149 | 0.8555 | -6.817 | 9.29E-12 |
| 6 | rs75924712  | 32506761 | A | ADD | 136057 | 1.137  | 5.75   | 8.90E-09 |
| 6 | rs78273580  | 32506779 | T | ADD | 135926 | 1.139  | 5.829  | 5.58E-09 |
| 6 | rs74729326  | 32506796 | T | ADD | 133217 | 1.143  | 5.93   | 3.03E-09 |
| 6 | rs141961165 | 32506799 | T | ADD | 137029 | 0.8094 | -9.778 | 1.40E-22 |
| 6 | rs74949117  | 32506846 | T | ADD | 146854 | 1.175  | 5.875  | 4.23E-09 |
| 6 | rs189968693 | 32506863 | A | ADD | 137348 | 0.8566 | -6.693 | 2.18E-11 |
| 6 | rs182987687 | 32506870 | C | ADD | 137338 | 0.8567 | -6.687 | 2.28E-11 |
| 6 | rs188426982 | 32506878 | A | ADD | 137338 | 0.8567 | -6.687 | 2.28E-11 |
| 6 | rs191423596 | 32506888 | C | ADD | 137347 | 0.8566 | -6.694 | 2.18E-11 |
| 6 | rs116715716 | 32506910 | T | ADD | 137341 | 0.8148 | -9.455 | 3.22E-21 |
| 6 | rs76539678  | 32506942 | C | ADD | 147111 | 1.17   | 5.771  | 7.87E-09 |
| 6 | rs79468266  | 32506982 | A | ADD | 145989 | 1.171  | 5.779  | 7.53E-09 |
| 6 | rs74500484  | 32506993 | G | ADD | 145989 | 1.171  | 5.779  | 7.53E-09 |
| 6 | rs150423066 | 32506995 | A | ADD | 138168 | 0.8554 | -6.858 | 6.96E-12 |
| 6 | rs148940091 | 32507101 | C | ADD | 131130 | 0.8132 | -9.262 | 2.01E-20 |

|   |             |          |   |     |        |        |        |          |
|---|-------------|----------|---|-----|--------|--------|--------|----------|
| 6 | rs536387398 | 32507125 | A | ADD | 128933 | 0.8533 | -6.389 | 1.67E-10 |
| 6 | rs113128948 | 32507129 | T | ADD | 114509 | 0.8131 | -8.721 | 2.77E-18 |
| 6 | rs573273966 | 32507131 | C | ADD | 128928 | 0.8531 | -6.397 | 1.58E-10 |
| 6 | rs115562562 | 32507200 | T | ADD | 146666 | 1.173  | 5.879  | 4.14E-09 |
| 6 | rs77687660  | 32507226 | G | ADD | 146683 | 1.171  | 5.815  | 6.08E-09 |
| 6 | rs113795374 | 32507296 | G | ADD | 147070 | 1.169  | 5.754  | 8.69E-09 |
| 6 | rs534024500 | 32507307 | G | ADD | 141893 | 0.862  | -6.513 | 7.38E-11 |
| 6 | rs112959132 | 32507310 | T | ADD | 147114 | 1.171  | 5.801  | 6.59E-09 |
| 6 | rs529484704 | 32507478 | C | ADD | 139886 | 0.8617 | -6.559 | 5.41E-11 |
| 6 | rs569509899 | 32507490 | G | ADD | 139862 | 0.8617 | -6.561 | 5.34E-11 |
| 6 | rs566710022 | 32507505 | T | ADD | 141809 | 0.8599 | -6.7   | 2.08E-11 |
| 6 | rs547631481 | 32507531 | A | ADD | 142448 | 0.8616 | -6.624 | 3.49E-11 |
| 6 | rs114580448 | 32507538 | T | ADD | 139761 | 1.134  | 5.742  | 9.35E-09 |
| 6 | rs67542250  | 32507548 | G | ADD | 147115 | 1.169  | 5.741  | 9.43E-09 |
| 6 | rs374408836 | 32507582 | C | ADD | 133873 | 0.8592 | -6.603 | 4.04E-11 |
| 6 | rs544353633 | 32507596 | G | ADD | 134605 | 0.8596 | -6.591 | 4.36E-11 |
| 6 | rs77077499  | 32507652 | T | ADD | 140306 | 0.8582 | -6.709 | 1.96E-11 |
| 6 | rs76325796  | 32507653 | A | ADD | 140306 | 0.8582 | -6.709 | 1.96E-11 |
| 6 | rs74197204  | 32507695 | G | ADD | 132151 | 0.8625 | -6.361 | 2.01E-10 |
| 6 | rs79740987  | 32507712 | G | ADD | 139280 | 0.8612 | -6.552 | 5.67E-11 |
| 6 | rs68009841  | 32507731 | T | ADD | 138903 | 0.8608 | -6.556 | 5.53E-11 |
| 6 | rs199636459 | 32507758 | A | ADD | 140335 | 0.8579 | -6.708 | 1.97E-11 |
| 6 | rs540194362 | 32507768 | G | ADD | 140341 | 0.8577 | -6.718 | 1.85E-11 |
| 6 | rs555383676 | 32507771 | A | ADD | 137565 | 0.8615 | -6.477 | 9.36E-11 |
| 6 | rs74786163  | 32507780 | T | ADD | 127982 | 0.8583 | -6.479 | 9.24E-11 |
| 6 | rs66781242  | 32507812 | G | ADD | 147662 | 1.175  | 5.869  | 4.39E-09 |
| 6 | rs72853919  | 32507852 | C | ADD | 130268 | 0.8608 | -6.462 | 1.03E-10 |
| 6 | rs66924955  | 32507855 | G | ADD | 130268 | 0.8608 | -6.462 | 1.03E-10 |
| 6 | rs147668426 | 32507931 | G | ADD | 140961 | 0.8579 | -6.72  | 1.81E-11 |
| 6 | rs571430728 | 32507938 | T | ADD | 140956 | 0.8579 | -6.719 | 1.83E-11 |
| 6 | rs539226504 | 32507944 | A | ADD | 140898 | 0.8584 | -6.695 | 2.15E-11 |
| 6 | rs140538649 | 32507946 | T | ADD | 140898 | 0.8584 | -6.695 | 2.15E-11 |
| 6 | rs555706008 | 32507953 | G | ADD | 141322 | 0.8583 | -6.715 | 1.88E-11 |
| 6 | rs573629697 | 32507971 | G | ADD | 141633 | 0.8589 | -6.7   | 2.08E-11 |
| 6 | rs180942055 | 32507976 | T | ADD | 141633 | 0.8589 | -6.7   | 2.08E-11 |
| 6 | rs186170828 | 32507977 | G | ADD | 141633 | 0.8589 | -6.7   | 2.08E-11 |
| 6 | rs142393802 | 32508021 | T | ADD | 142898 | 0.8583 | -6.747 | 1.51E-11 |
| 6 | rs549780202 | 32508055 | T | ADD | 142254 | 0.8587 | -6.702 | 2.06E-11 |

|   |             |          |   |     |        |        |        |          |
|---|-------------|----------|---|-----|--------|--------|--------|----------|
| 6 | rs564974789 | 32508061 | A | ADD | 142254 | 0.8587 | -6.702 | 2.06E-11 |
| 6 | rs532618689 | 32508064 | T | ADD | 142254 | 0.8587 | -6.702 | 2.06E-11 |
| 6 | rs192164737 | 32508091 | G | ADD | 142249 | 0.8587 | -6.701 | 2.08E-11 |
| 6 | rs66479855  | 32508187 | T | ADD | 147418 | 1.17   | 5.77   | 7.92E-09 |
| 6 | rs556173675 | 32508202 | G | ADD | 141564 | 0.8592 | -6.675 | 2.47E-11 |
| 6 | rs67342127  | 32508204 | T | ADD | 147418 | 1.17   | 5.77   | 7.92E-09 |
| 6 | rs538718414 | 32508207 | T | ADD | 141608 | 0.8593 | -6.67  | 2.56E-11 |
| 6 | rs72853923  | 32508222 | G | ADD | 141379 | 0.8585 | -6.704 | 2.02E-11 |
| 6 | rs72853924  | 32508239 | G | ADD | 140666 | 0.858  | -6.724 | 1.77E-11 |
| 6 | rs115081905 | 32508276 | T | ADD | 141413 | 0.8523 | -7.033 | 2.02E-12 |
| 6 | rs74715621  | 32508285 | G | ADD | 141451 | 0.8518 | -7.061 | 1.66E-12 |
| 6 | rs67860869  | 32508349 | C | ADD | 131790 | 0.8553 | -6.742 | 1.56E-11 |
| 6 | rs72508473  | 32508399 | G | ADD | 130957 | 0.8536 | -6.817 | 9.27E-12 |
| 6 | rs202231764 | 32508412 | T | ADD | 129213 | 0.8566 | -6.619 | 3.61E-11 |
| 6 | rs72853926  | 32508451 | G | ADD | 128140 | 0.8635 | -6.248 | 4.16E-10 |
| 6 | rs78017592  | 32508455 | C | ADD | 119547 | 1.187  | 6.589  | 4.42E-11 |
| 6 | rs72853927  | 32508474 | G | ADD | 128892 | 0.861  | -6.358 | 2.04E-10 |
| 6 | rs72853928  | 32508486 | T | ADD | 129285 | 0.8609 | -6.376 | 1.82E-10 |
| 6 | rs75820413  | 32508505 | G | ADD | 131241 | 0.8627 | -6.333 | 2.40E-10 |
| 6 | rs62405590  | 32508559 | G | ADD | 146240 | 1.17   | 5.779  | 7.50E-09 |
| 6 | rs373664556 | 32508561 | C | ADD | 140910 | 0.8561 | -6.796 | 1.08E-11 |
| 6 | rs76376937  | 32508568 | G | ADD | 140902 | 0.8559 | -6.805 | 1.01E-11 |
| 6 | rs116224274 | 32508583 | C | ADD | 140906 | 0.8564 | -6.775 | 1.25E-11 |
| 6 | rs77173653  | 32508587 | G | ADD | 140902 | 0.8565 | -6.772 | 1.27E-11 |
| 6 | rs78278896  | 32508647 | G | ADD | 114726 | 0.8616 | -6.023 | 1.71E-09 |
| 6 | rs72508474  | 32508738 | C | ADD | 131071 | 0.8583 | -6.614 | 3.73E-11 |
| 6 | rs62405592  | 32508757 | A | ADD | 147653 | 1.17   | 5.772  | 7.85E-09 |
| 6 | rs115664796 | 32508758 | C | ADD | 130756 | 0.8578 | -6.631 | 3.33E-11 |
| 6 | rs113648142 | 32508762 | T | ADD | 131043 | 0.8586 | -6.597 | 4.21E-11 |
| 6 | rs67774869  | 32508794 | C | ADD | 139587 | 0.8606 | -6.65  | 2.94E-11 |
| 6 | rs67916930  | 32508823 | G | ADD | 140049 | 0.8614 | -6.613 | 3.77E-11 |
| 6 | rs113209512 | 32508875 | T | ADD | 136249 | 0.8564 | -6.735 | 1.64E-11 |
| 6 | rs73727954  | 32508902 | T | ADD | 136496 | 0.8567 | -6.711 | 1.94E-11 |
| 6 | rs72853940  | 32508945 | T | ADD | 139594 | 0.8596 | -6.684 | 2.33E-11 |
| 6 | rs68122208  | 32508981 | A | ADD | 147512 | 1.169  | 5.765  | 8.18E-09 |
| 6 | rs73727960  | 32508989 | G | ADD | 139892 | 0.8624 | -6.561 | 5.36E-11 |
| 6 | rs200263528 | 32509009 | C | ADD | 139861 | 0.8607 | -6.646 | 3.02E-11 |
| 6 | rs111559749 | 32509012 | T | ADD | 133961 | 0.8665 | -6.233 | 4.59E-10 |

|   |             |          |   |     |        |        |        |          |
|---|-------------|----------|---|-----|--------|--------|--------|----------|
| 6 | rs73727961  | 32509022 | A | ADD | 139799 | 0.8599 | -6.689 | 2.25E-11 |
| 6 | rs72492303  | 32509061 | T | ADD | 139891 | 0.8589 | -6.739 | 1.60E-11 |
| 6 | rs67041740  | 32509273 | C | ADD | 138211 | 0.8596 | -6.665 | 2.65E-11 |
| 6 | rs79207037  | 32509294 | A | ADD | 136931 | 1.142  | 5.944  | 2.78E-09 |
| 6 | rs72492304  | 32509311 | C | ADD | 138244 | 0.8589 | -6.699 | 2.09E-11 |
| 6 | rs66678933  | 32509320 | T | ADD | 138244 | 0.8589 | -6.699 | 2.09E-11 |
| 6 | rs75635252  | 32509332 | G | ADD | 135584 | 1.141  | 5.859  | 4.66E-09 |
| 6 | rs79957603  | 32509348 | A | ADD | 135598 | 1.142  | 5.876  | 4.20E-09 |
| 6 | rs28772724  | 32509357 | T | ADD | 135185 | 1.153  | 6.277  | 3.46E-10 |
| 6 | rs66502326  | 32509411 | T | ADD | 136737 | 0.8563 | -6.808 | 9.88E-12 |
| 6 | rs72853949  | 32509435 | T | ADD | 132256 | 0.8624 | -6.387 | 1.69E-10 |
| 6 | rs115704383 | 32509460 | T | ADD | 138978 | 0.8574 | -6.779 | 1.21E-11 |
| 6 | rs114246255 | 32509461 | G | ADD | 138978 | 0.8574 | -6.779 | 1.21E-11 |
| 6 | rs116413420 | 32509466 | T | ADD | 132044 | 0.8616 | -6.413 | 1.43E-10 |
| 6 | rs72853950  | 32509472 | T | ADD | 138928 | 0.8579 | -6.755 | 1.43E-11 |
| 6 | rs72492306  | 32509510 | A | ADD | 138803 | 0.8556 | -6.865 | 6.65E-12 |
| 6 | rs72492307  | 32509519 | C | ADD | 139003 | 0.8572 | -6.791 | 1.11E-11 |
| 6 | rs113686014 | 32509551 | A | ADD | 136398 | 1.14   | 5.831  | 5.52E-09 |
| 6 | rs28819746  | 32509579 | C | ADD | 139620 | 0.8538 | -6.869 | 6.46E-12 |
| 6 | rs68126668  | 32509603 | A | ADD | 139089 | 0.8568 | -6.813 | 9.59E-12 |
| 6 | rs73727972  | 32509683 | G | ADD | 113402 | 0.8443 | -6.953 | 3.58E-12 |
| 6 | rs73727973  | 32509691 | G | ADD | 139880 | 0.8568 | -6.82  | 9.13E-12 |
| 6 | rs113871699 | 32509693 | T | ADD | 114127 | 0.8448 | -6.941 | 3.89E-12 |
| 6 | rs76965357  | 32509778 | C | ADD | 137855 | 1.15   | 6.232  | 4.61E-10 |
| 6 | rs66521709  | 32509829 | A | ADD | 139629 | 0.8539 | -6.86  | 6.89E-12 |
| 6 | rs79215033  | 32509858 | G | ADD | 140412 | 1.142  | 6.064  | 1.33E-09 |
| 6 | rs72492310  | 32509867 | G | ADD | 143102 | 0.8577 | -6.832 | 8.39E-12 |
| 6 | rs74768610  | 32509868 | C | ADD | 140409 | 1.141  | 6.058  | 1.38E-09 |
| 6 | rs72853968  | 32509883 | C | ADD | 143113 | 0.8582 | -6.81  | 9.76E-12 |
| 6 | rs28844904  | 32509895 | G | ADD | 147638 | 1.169  | 5.763  | 8.24E-09 |
| 6 | rs78942674  | 32509897 | T | ADD | 141209 | 0.8567 | -6.853 | 7.24E-12 |
| 6 | rs72853970  | 32509919 | A | ADD | 141599 | 0.8567 | -6.86  | 6.88E-12 |
| 6 | rs59350153  | 32509935 | T | ADD | 138519 | 1.138  | 5.813  | 6.13E-09 |
| 6 | rs72853971  | 32509938 | C | ADD | 141609 | 0.8571 | -6.839 | 7.95E-12 |
| 6 | rs72492311  | 32509979 | T | ADD | 139645 | 0.8546 | -6.832 | 8.40E-12 |
| 6 | rs57588792  | 32510012 | A | ADD | 138370 | 1.137  | 5.767  | 8.09E-09 |
| 6 | rs116190325 | 32510039 | A | ADD | 134525 | 0.8572 | -6.71  | 1.95E-11 |
| 6 | rs115137792 | 32510114 | C | ADD | 133507 | 0.8487 | -6.91  | 4.86E-12 |

|   |             |          |   |     |        |        |        |          |
|---|-------------|----------|---|-----|--------|--------|--------|----------|
| 6 | rs199616440 | 32510115 | T | ADD | 133611 | 0.849  | -6.894 | 5.42E-12 |
| 6 | rs537977627 | 32510140 | A | ADD | 141363 | 0.856  | -6.888 | 5.68E-12 |
| 6 | rs71534520  | 32510146 | G | ADD | 140959 | 0.8529 | -7.051 | 1.78E-12 |
| 6 | rs58537387  | 32510176 | T | ADD | 138353 | 1.139  | 5.857  | 4.70E-09 |
| 6 | rs111590055 | 32510177 | C | ADD | 141219 | 0.8555 | -6.909 | 4.90E-12 |
| 6 | rs113085907 | 32510224 | G | ADD | 141170 | 0.8536 | -7.003 | 2.51E-12 |
| 6 | rs147266303 | 32510268 | C | ADD | 140669 | 0.8532 | -7.016 | 2.29E-12 |
| 6 | rs28769628  | 32510281 | A | ADD | 147653 | 1.17   | 5.789  | 7.09E-09 |
| 6 | rs112780153 | 32510301 | C | ADD | 141791 | 0.8537 | -6.988 | 2.80E-12 |
| 6 | rs112111526 | 32510317 | A | ADD | 142274 | 0.8508 | -7.148 | 8.79E-13 |
| 6 | rs144411837 | 32510337 | C | ADD | 142223 | 0.8539 | -6.99  | 2.75E-12 |
| 6 | rs140120971 | 32510343 | C | ADD | 142136 | 0.8539 | -6.992 | 2.71E-12 |
| 6 | rs143822887 | 32510344 | A | ADD | 142136 | 0.8539 | -6.992 | 2.71E-12 |
| 6 | rs28404276  | 32510355 | G | ADD | 138177 | 1.237  | 9.837  | 7.80E-23 |
| 6 | rs113220298 | 32510369 | T | ADD | 140799 | 0.8536 | -6.992 | 2.71E-12 |
| 6 | rs112465099 | 32510430 | G | ADD | 141084 | 0.8564 | -6.844 | 7.68E-12 |
| 6 | rs113623173 | 32510438 | T | ADD | 138329 | 1.137  | 5.766  | 8.12E-09 |
| 6 | rs80083020  | 32510439 | C | ADD | 141084 | 0.8564 | -6.844 | 7.68E-12 |
| 6 | rs112944992 | 32510457 | C | ADD | 141115 | 0.8567 | -6.834 | 8.26E-12 |
| 6 | rs115124923 | 32510482 | A | ADD | 125818 | 1.21   | 7.616  | 2.62E-14 |
| 6 | rs116209683 | 32510508 | C | ADD | 141593 | 0.8566 | -6.859 | 6.91E-12 |
| 6 | rs74535936  | 32510547 | G | ADD | 141574 | 0.8562 | -6.878 | 6.07E-12 |
| 6 | rs79005639  | 32510582 | C | ADD | 138374 | 1.138  | 5.835  | 5.37E-09 |
| 6 | rs76723065  | 32510591 | G | ADD | 141578 | 0.8559 | -6.897 | 5.32E-12 |
| 6 | rs114472333 | 32510598 | T | ADD | 141434 | 0.8563 | -6.866 | 6.59E-12 |
| 6 | rs114015220 | 32510599 | T | ADD | 141434 | 0.8563 | -6.866 | 6.59E-12 |
| 6 | rs200951960 | 32510600 | G | ADD | 124242 | 1.195  | 7.185  | 6.72E-13 |
| 6 | rs112895453 | 32510602 | G | ADD | 138200 | 1.138  | 5.811  | 6.20E-09 |
| 6 | rs368398419 | 32510709 | C | ADD | 143562 | 0.858  | -6.805 | 1.01E-11 |
| 6 | rs371989616 | 32510718 | T | ADD | 143562 | 0.858  | -6.805 | 1.01E-11 |
| 6 | rs138222522 | 32510733 | T | ADD | 142848 | 1.133  | 5.821  | 5.84E-09 |
| 6 | rs112628749 | 32510769 | T | ADD | 142743 | 1.133  | 5.83   | 5.56E-09 |
| 6 | rs113766057 | 32510772 | A | ADD | 142744 | 1.133  | 5.828  | 5.60E-09 |
| 6 | rs112894757 | 32510777 | T | ADD | 142733 | 1.133  | 5.82   | 5.87E-09 |
| 6 | rs536463096 | 32510951 | G | ADD | 144380 | 0.8558 | -6.907 | 4.96E-12 |
| 6 | rs187395433 | 32510968 | G | ADD | 144376 | 0.8555 | -6.927 | 4.31E-12 |
| 6 | rs71534526  | 32510974 | C | ADD | 144076 | 0.8153 | -9.644 | 5.20E-22 |
| 6 | rs541499994 | 32510983 | C | ADD | 144019 | 0.8553 | -6.917 | 4.61E-12 |

|   |                |          |   |     |        |        |        |          |
|---|----------------|----------|---|-----|--------|--------|--------|----------|
| 6 | rs183134414    | 32511069 | T | ADD | 144527 | 0.8544 | -6.988 | 2.78E-12 |
| 6 | rs111847217    | 32511131 | G | ADD | 141040 | 0.8562 | -6.811 | 9.72E-12 |
| 6 | rs111632178    | 32511149 | C | ADD | 141036 | 0.8563 | -6.807 | 9.94E-12 |
| 6 | rs112427949    | 32511164 | T | ADD | 141098 | 0.8557 | -6.838 | 8.05E-12 |
| 6 | rs190411898    | 32511180 | T | ADD | 139940 | 1.137  | 5.82   | 5.87E-09 |
| 6 | rs111896611    | 32511183 | T | ADD | 142990 | 0.8569 | -6.852 | 7.30E-12 |
| 6 | rs71534530     | 32511211 | A | ADD | 140897 | 0.8137 | -9.623 | 6.37E-22 |
| 6 | 6:32511475_G_C | 32511475 | C | ADD | 118340 | 1.263  | 6.316  | 2.68E-10 |
| 6 | rs74750549     | 32511488 | T | ADD | 100784 | 1.207  | 6.824  | 8.86E-12 |
| 6 | rs72853979     | 32511572 | T | ADD | 145054 | 0.8611 | -6.717 | 1.86E-11 |
| 6 | rs62405593     | 32511602 | A | ADD | 148247 | 1.171  | 5.824  | 5.75E-09 |
| 6 | rs111797109    | 32511650 | T | ADD | 140230 | 1.148  | 6.249  | 4.13E-10 |
| 6 | rs73727980     | 32511774 | C | ADD | 148337 | 0.859  | -6.855 | 7.13E-12 |
| 6 | rs73727981     | 32511791 | C | ADD | 148783 | 0.8595 | -6.83  | 8.49E-12 |
| 6 | rs72853983     | 32511854 | A | ADD | 147948 | 0.8596 | -6.818 | 9.25E-12 |
| 6 | rs113192265    | 32511884 | C | ADD | 129816 | 1.186  | 7.11   | 1.16E-12 |
| 6 | rs75141783     | 32511944 | A | ADD | 147884 | 0.8599 | -6.804 | 1.02E-11 |
| 6 | rs72492319     | 32511987 | T | ADD | 147836 | 0.8599 | -6.803 | 1.03E-11 |
| 6 | rs79202843     | 32512007 | T | ADD | 148293 | 1.171  | 5.825  | 5.72E-09 |
| 6 | rs77789453     | 32512013 | C | ADD | 133697 | 1.148  | 5.973  | 2.33E-09 |
| 6 | rs28584364     | 32512048 | C | ADD | 141630 | 1.229  | 9.637  | 5.60E-22 |
| 6 | rs79508322     | 32512049 | A | ADD | 141175 | 1.135  | 5.78   | 7.47E-09 |
| 6 | rs116675816    | 32512131 | A | ADD | 147491 | 0.8581 | -6.881 | 5.93E-12 |
| 6 | rs529580232    | 32512136 | C | ADD | 147489 | 0.8581 | -6.881 | 5.95E-12 |
| 6 | rs551034683    | 32512138 | A | ADD | 147489 | 0.8581 | -6.881 | 5.95E-12 |
| 6 | rs562852671    | 32512142 | T | ADD | 143866 | 0.8543 | -6.952 | 3.59E-12 |
| 6 | rs112458679    | 32512167 | G | ADD | 147415 | 0.8594 | -6.814 | 9.47E-12 |
| 6 | rs28467173     | 32512180 | A | ADD | 148102 | 1.17   | 5.813  | 6.12E-09 |
| 6 | rs534064478    | 32512189 | T | ADD | 146910 | 0.8553 | -6.989 | 2.77E-12 |
| 6 | rs546382275    | 32512190 | G | ADD | 146910 | 0.8553 | -6.989 | 2.77E-12 |
| 6 | rs535694878    | 32512216 | A | ADD | 130215 | 0.8143 | -9.114 | 7.92E-20 |
| 6 | rs556986229    | 32512217 | G | ADD | 130215 | 0.8143 | -9.114 | 7.92E-20 |
| 6 | rs111725169    | 32512223 | C | ADD | 145796 | 0.8523 | -7.122 | 1.07E-12 |
| 6 | rs115303801    | 32512229 | G | ADD | 146853 | 0.8554 | -6.979 | 2.98E-12 |
| 6 | rs111289870    | 32512269 | C | ADD | 147398 | 0.8587 | -6.852 | 7.28E-12 |
| 6 | rs72853989     | 32512321 | T | ADD | 146035 | 0.8578 | -6.875 | 6.20E-12 |
| 6 | rs67081540     | 32512359 | C | ADD | 143751 | 0.8549 | -6.996 | 2.63E-12 |
| 6 | rs66497315     | 32512407 | C | ADD | 144512 | 0.8557 | -6.958 | 3.45E-12 |

|   |             |          |   |     |        |        |        |          |
|---|-------------|----------|---|-----|--------|--------|--------|----------|
| 6 | rs72492314  | 32512421 | A | ADD | 144513 | 0.8557 | -6.958 | 3.44E-12 |
| 6 | rs72492315  | 32512466 | C | ADD | 144189 | 0.8549 | -6.982 | 2.92E-12 |
| 6 | rs72492316  | 32512481 | A | ADD | 147735 | 1.169  | 5.747  | 9.09E-09 |
| 6 | rs72492317  | 32512501 | A | ADD | 138021 | 0.8662 | -6.303 | 2.92E-10 |
| 6 | rs66857824  | 32512539 | C | ADD | 148003 | 1.177  | 5.937  | 2.90E-09 |
| 6 | rs113522240 | 32512591 | G | ADD | 140683 | 1.145  | 6.123  | 9.21E-10 |
| 6 | rs66534143  | 32512601 | C | ADD | 142427 | 0.8542 | -7.018 | 2.26E-12 |
| 6 | rs113046257 | 32512753 | T | ADD | 140420 | 1.135  | 5.734  | 9.79E-09 |
| 6 | rs71534539  | 32512754 | A | ADD | 90251  | 0.7874 | -8.491 | 2.05E-17 |
| 6 | rs113085203 | 32512789 | G | ADD | 140430 | 1.135  | 5.748  | 9.02E-09 |
| 6 | rs116585338 | 32512812 | G | ADD | 126053 | 1.186  | 6.93   | 4.20E-12 |
| 6 | rs76235954  | 32512815 | A | ADD | 142450 | 0.8548 | -6.944 | 3.82E-12 |
| 6 | rs545256869 | 32512858 | T | ADD | 142311 | 0.8561 | -6.88  | 6.00E-12 |
| 6 | rs572081630 | 32512882 | T | ADD | 140545 | 1.136  | 5.752  | 8.83E-09 |
| 6 | rs562624040 | 32513024 | C | ADD | 144308 | 0.8564 | -6.893 | 5.45E-12 |
| 6 | rs74394760  | 32513078 | C | ADD | 145351 | 0.8579 | -6.856 | 7.08E-12 |
| 6 | rs113568276 | 32513127 | A | ADD | 128894 | 1.176  | 6.92   | 4.51E-12 |
| 6 | rs67499532  | 32513184 | G | ADD | 132172 | 0.8233 | -8.727 | 2.62E-18 |
| 6 | rs139201366 | 32513186 | A | ADD | 132840 | 0.8705 | -5.779 | 7.52E-09 |
| 6 | rs72844103  | 32513249 | A | ADD | 148394 | 1.17   | 5.812  | 6.16E-09 |
| 6 | rs72844104  | 32513250 | C | ADD | 148394 | 1.17   | 5.812  | 6.16E-09 |
| 6 | rs74950807  | 32513375 | T | ADD | 141670 | 0.866  | -6.341 | 2.28E-10 |
| 6 | rs76818741  | 32513378 | A | ADD | 141658 | 0.8659 | -6.347 | 2.20E-10 |
| 6 | rs112515515 | 32513422 | T | ADD | 140581 | 0.863  | -6.448 | 1.14E-10 |
| 6 | rs113011827 | 32513453 | T | ADD | 127497 | 1.193  | 7.24   | 4.48E-13 |
| 6 | rs34442507  | 32513531 | T | ADD | 148313 | 1.178  | 5.995  | 2.03E-09 |
| 6 | rs116817148 | 32513534 | G | ADD | 144341 | 0.8548 | -6.998 | 2.59E-12 |
| 6 | rs114353707 | 32513535 | C | ADD | 144341 | 0.8548 | -6.998 | 2.59E-12 |
| 6 | rs35997662  | 32513575 | G | ADD | 148313 | 1.178  | 5.995  | 2.03E-09 |
| 6 | rs35301884  | 32513638 | C | ADD | 144340 | 0.8546 | -7.006 | 2.45E-12 |
| 6 | rs35350417  | 32513687 | C | ADD | 148449 | 1.17   | 5.814  | 6.11E-09 |
| 6 | rs62405598  | 32513708 | C | ADD | 143213 | 1.138  | 5.876  | 4.21E-09 |
| 6 | rs35687625  | 32513840 | A | ADD | 144134 | 0.8547 | -7.003 | 2.50E-12 |
| 6 | rs34615209  | 32513862 | T | ADD | 144134 | 0.8547 | -7.003 | 2.50E-12 |
| 6 | rs33998225  | 32513883 | T | ADD | 148316 | 1.178  | 5.996  | 2.02E-09 |
| 6 | rs62405629  | 32513885 | T | ADD | 142434 | 1.138  | 5.86   | 4.62E-09 |
| 6 | rs66706092  | 32513915 | T | ADD | 144070 | 0.8539 | -7.044 | 1.87E-12 |
| 6 | rs72844111  | 32513938 | C | ADD | 144065 | 0.8542 | -7.029 | 2.08E-12 |

|   |             |          |   |     |        |        |        |          |
|---|-------------|----------|---|-----|--------|--------|--------|----------|
| 6 | rs62405630  | 32513942 | T | ADD | 142414 | 1.138  | 5.863  | 4.56E-09 |
| 6 | rs34072909  | 32513966 | A | ADD | 148451 | 1.17   | 5.813  | 6.13E-09 |
| 6 | rs73728002  | 32513993 | A | ADD | 143184 | 0.8553 | -6.954 | 3.56E-12 |
| 6 | rs112587701 | 32514041 | A | ADD | 140042 | 1.149  | 6.283  | 3.32E-10 |
| 6 | rs112158360 | 32514050 | G | ADD | 138304 | 1.14   | 5.778  | 7.54E-09 |
| 6 | rs34369284  | 32514144 | T | ADD | 139707 | 0.8539 | -6.866 | 6.61E-12 |
| 6 | rs113484779 | 32514162 | T | ADD | 142640 | 1.135  | 5.76   | 8.39E-09 |
| 6 | rs113961302 | 32514219 | G | ADD | 142068 | 1.136  | 5.758  | 8.52E-09 |
| 6 | rs67255973  | 32514248 | A | ADD | 148461 | 1.17   | 5.812  | 6.16E-09 |
| 6 | rs66863443  | 32514284 | A | ADD | 148313 | 1.17   | 5.787  | 7.18E-09 |
| 6 | rs73729106  | 32514288 | T | ADD | 126864 | 0.842  | -7.455 | 8.95E-14 |
| 6 | rs67571763  | 32514302 | A | ADD | 148313 | 1.17   | 5.787  | 7.18E-09 |
| 6 | rs77783340  | 32514313 | T | ADD | 143747 | 0.8558 | -6.936 | 4.04E-12 |
| 6 | rs68124732  | 32514384 | T | ADD | 148457 | 1.17   | 5.812  | 6.17E-09 |
| 6 | rs115806221 | 32514401 | G | ADD | 143862 | 0.8558 | -6.937 | 4.00E-12 |
| 6 | rs62405631  | 32514500 | C | ADD | 142820 | 1.136  | 5.787  | 7.18E-09 |
| 6 | rs72844118  | 32514539 | T | ADD | 143742 | 0.857  | -6.877 | 6.13E-12 |
| 6 | rs62405633  | 32514566 | T | ADD | 147594 | 1.173  | 5.92   | 3.22E-09 |
| 6 | rs201795916 | 32514567 | C | ADD | 143681 | 0.8573 | -6.862 | 6.81E-12 |
| 6 | rs62405634  | 32514623 | A | ADD | 143371 | 1.171  | 5.847  | 5.01E-09 |
| 6 | rs73395560  | 32514671 | C | ADD | 143257 | 1.177  | 5.975  | 2.29E-09 |
| 6 | rs114171624 | 32514706 | G | ADD | 143673 | 0.857  | -6.872 | 6.31E-12 |
| 6 | rs537206245 | 32514754 | C | ADD | 137632 | 1.137  | 5.764  | 8.23E-09 |
| 6 | rs539579029 | 32514764 | T | ADD | 137632 | 1.137  | 5.764  | 8.23E-09 |
| 6 | rs116748457 | 32514768 | G | ADD | 126328 | 0.8426 | -7.439 | 1.01E-13 |
| 6 | rs185234644 | 32514792 | C | ADD | 121105 | 1.198  | 7.201  | 6.00E-13 |
| 6 | rs574347579 | 32514817 | A | ADD | 137745 | 1.138  | 5.771  | 7.89E-09 |
| 6 | rs116085924 | 32514884 | G | ADD | 143043 | 0.8564 | -6.892 | 5.52E-12 |
| 6 | rs62405635  | 32516494 | G | ADD | 148514 | 1.17   | 5.787  | 7.18E-09 |
| 6 | rs62405636  | 32516526 | G | ADD | 148514 | 1.17   | 5.787  | 7.18E-09 |
| 6 | rs76033762  | 32516702 | C | ADD | 140864 | 0.8542 | -6.977 | 3.02E-12 |
| 6 | rs201639066 | 32516705 | T | ADD | 135574 | 1.142  | 5.917  | 3.28E-09 |
| 6 | rs62405637  | 32516706 | C | ADD | 148514 | 1.169  | 5.763  | 8.24E-09 |
| 6 | rs62405638  | 32516715 | T | ADD | 135950 | 1.142  | 5.907  | 3.47E-09 |
| 6 | rs62405639  | 32516724 | C | ADD | 135950 | 1.142  | 5.907  | 3.47E-09 |
| 6 | rs62405640  | 32516729 | T | ADD | 140864 | 0.8542 | -6.977 | 3.02E-12 |
| 6 | rs113850533 | 32516839 | T | ADD | 133134 | 0.8531 | -6.901 | 5.16E-12 |
| 6 | rs111901878 | 32516893 | T | ADD | 124442 | 0.8623 | -6.281 | 3.36E-10 |



|   |             |          |   |     |        |        |        |          |
|---|-------------|----------|---|-----|--------|--------|--------|----------|
| 6 | rs554943670 | 32516971 | G | ADD | 114207 | 1.165  | 5.82   | 5.87E-09 |
| 6 | rs71534598  | 32516972 | T | ADD | 148323 | 1.178  | 5.991  | 2.08E-09 |
| 6 | rs537501315 | 32516973 | A | ADD | 107679 | 1.202  | 6.42   | 1.37E-10 |
| 6 | rs113727677 | 32517010 | C | ADD | 121346 | 0.863  | -6.162 | 7.19E-10 |
| 6 | rs185282713 | 32517018 | C | ADD | 116837 | 1.158  | 5.735  | 9.74E-09 |
| 6 | rs138087636 | 32517031 | T | ADD | 116895 | 1.158  | 5.746  | 9.15E-09 |
| 6 | rs111945767 | 32517045 | C | ADD | 128874 | 0.8612 | -6.407 | 1.49E-10 |
| 6 | rs370791576 | 32517082 | A | ADD | 134147 | 1.14   | 5.798  | 6.72E-09 |
| 6 | rs61362782  | 32517084 | C | ADD | 148170 | 1.174  | 5.841  | 5.20E-09 |
| 6 | rs71536503  | 32517119 | G | ADD | 148517 | 1.169  | 5.765  | 8.18E-09 |
| 6 | rs111340421 | 32517174 | G | ADD | 137151 | 0.8574 | -6.744 | 1.54E-11 |
| 6 | rs192002545 | 32517227 | A | ADD | 121107 | 1.162  | 6.085  | 1.17E-09 |
| 6 | rs183870834 | 32517228 | C | ADD | 121105 | 1.162  | 6.083  | 1.18E-09 |
| 6 | rs74821931  | 32517233 | A | ADD | 125131 | 0.8484 | -6.982 | 2.92E-12 |
| 6 | rs112300533 | 32517237 | T | ADD | 125126 | 0.8483 | -6.984 | 2.87E-12 |
| 6 | rs530246116 | 32517244 | C | ADD | 121046 | 1.163  | 6.11   | 9.96E-10 |
| 6 | rs71536505  | 32517251 | G | ADD | 148463 | 1.169  | 5.775  | 7.70E-09 |
| 6 | rs67816706  | 32517266 | T | ADD | 118679 | 0.8376 | -7.39  | 1.46E-13 |
| 6 | rs67965605  | 32517293 | T | ADD | 148473 | 1.169  | 5.782  | 7.38E-09 |
| 6 | rs111403760 | 32517303 | C | ADD | 121318 | 1.162  | 6.085  | 1.16E-09 |
| 6 | rs116333937 | 32517381 | T | ADD | 115845 | 1.169  | 5.835  | 5.37E-09 |
| 6 | rs114233058 | 32517386 | T | ADD | 128396 | 0.852  | -6.885 | 5.79E-12 |
| 6 | rs115916707 | 32517387 | G | ADD | 128396 | 0.852  | -6.885 | 5.79E-12 |
| 6 | rs78055135  | 32517412 | A | ADD | 123799 | 1.162  | 6.25   | 4.10E-10 |
| 6 | rs115712530 | 32517414 | A | ADD | 116423 | 1.175  | 6.085  | 1.16E-09 |
| 6 | rs68175425  | 32517446 | G | ADD | 127514 | 0.8464 | -7.122 | 1.07E-12 |
| 6 | rs114520912 | 32517504 | T | ADD | 135239 | 0.8488 | -7.151 | 8.61E-13 |
| 6 | rs116645664 | 32517505 | C | ADD | 135239 | 0.8488 | -7.151 | 8.61E-13 |
| 6 | rs78733108  | 32517511 | G | ADD | 124895 | 1.149  | 5.744  | 9.22E-09 |
| 6 | rs73729111  | 32517525 | T | ADD | 129049 | 0.8577 | -6.574 | 4.91E-11 |
| 6 | rs67721312  | 32517556 | T | ADD | 135226 | 0.8486 | -7.16  | 8.05E-13 |
| 6 | rs74194578  | 32517590 | T | ADD | 135364 | 0.8491 | -7.138 | 9.47E-13 |
| 6 | rs111365964 | 32517646 | G | ADD | 126846 | 1.174  | 6.634  | 3.27E-11 |
| 6 | rs79890132  | 32517668 | A | ADD | 125811 | 1.149  | 5.797  | 6.75E-09 |
| 6 | rs111838566 | 32517727 | G | ADD | 118679 | 1.159  | 5.873  | 4.29E-09 |
| 6 | rs199882626 | 32517752 | A | ADD | 121024 | 1.153  | 5.756  | 8.60E-09 |
| 6 | rs201326238 | 32517754 | T | ADD | 112196 | 1.176  | 6.157  | 7.42E-10 |
| 6 | rs62405642  | 32517759 | G | ADD | 125290 | 0.8556 | -6.624 | 3.49E-11 |

|   |             |          |   |     |        |        |        |          |
|---|-------------|----------|---|-----|--------|--------|--------|----------|
| 6 | rs116135263 | 32517913 | A | ADD | 104613 | 1.196  | 5.809  | 6.29E-09 |
| 6 | rs62405644  | 32517933 | T | ADD | 148260 | 1.171  | 5.824  | 5.76E-09 |
| 6 | rs113460787 | 32518089 | T | ADD | 128087 | 0.8561 | -6.628 | 3.41E-11 |
| 6 | rs75861594  | 32518103 | G | ADD | 128244 | 0.8554 | -6.668 | 2.60E-11 |
| 6 | rs112004746 | 32518155 | T | ADD | 121162 | 0.8537 | -6.644 | 3.06E-11 |
| 6 | rs66931410  | 32518235 | C | ADD | 136549 | 0.8076 | -9.709 | 2.77E-22 |
| 6 | rs113182435 | 32518236 | A | ADD | 113900 | 1.188  | 6.443  | 1.17E-10 |
| 6 | rs111693298 | 32518251 | T | ADD | 114531 | 1.185  | 6.429  | 1.29E-10 |
| 6 | rs113232784 | 32518256 | A | ADD | 118382 | 0.8472 | -6.915 | 4.69E-12 |
| 6 | rs551468481 | 32518258 | G | ADD | 114525 | 1.188  | 6.493  | 8.43E-11 |
| 6 | rs71536510  | 32518262 | T | ADD | 148531 | 1.17   | 5.807  | 6.36E-09 |
| 6 | rs71536511  | 32518265 | A | ADD | 148531 | 1.17   | 5.805  | 6.42E-09 |
| 6 | rs111649944 | 32518268 | T | ADD | 125690 | 0.853  | -6.742 | 1.56E-11 |
| 6 | rs147023195 | 32518295 | T | ADD | 126418 | 0.8544 | -6.681 | 2.37E-11 |
| 6 | rs66468365  | 32518310 | A | ADD | 148529 | 1.18   | 6.033  | 1.61E-09 |
| 6 | rs66482188  | 32518312 | A | ADD | 148503 | 1.171  | 5.835  | 5.37E-09 |
| 6 | rs66884109  | 32518369 | G | ADD | 148590 | 1.179  | 6.015  | 1.80E-09 |
| 6 | rs138825368 | 32518375 | A | ADD | 124239 | 1.15   | 5.745  | 9.20E-09 |
| 6 | rs78622201  | 32518405 | A | ADD | 128500 | 0.8539 | -6.749 | 1.49E-11 |
| 6 | rs112180912 | 32518436 | A | ADD | 128495 | 0.8539 | -6.748 | 1.50E-11 |
| 6 | rs115754308 | 32518466 | T | ADD | 125342 | 1.149  | 5.754  | 8.70E-09 |
| 6 | rs28613510  | 32518507 | G | ADD | 125455 | 1.249  | 9.76   | 1.67E-22 |
| 6 | rs28524681  | 32518584 | A | ADD | 148413 | 1.17   | 5.82   | 5.89E-09 |
| 6 | rs114776163 | 32518625 | G | ADD | 113102 | 0.8549 | -5.924 | 3.14E-09 |
| 6 | rs113787446 | 32518630 | C | ADD | 113106 | 0.8549 | -5.926 | 3.11E-09 |
| 6 | rs67461697  | 32518767 | C | ADD | 99112  | 0.8109 | -6.391 | 1.65E-10 |
| 6 | rs74290599  | 32518785 | T | ADD | 99108  | 0.811  | -6.388 | 1.69E-10 |
| 6 | rs74997284  | 32518934 | G | ADD | 116215 | 0.8469 | -6.137 | 8.40E-10 |
| 6 | rs78326230  | 32518935 | A | ADD | 116215 | 0.8469 | -6.137 | 8.40E-10 |
| 6 | rs536708130 | 32518949 | G | ADD | 116166 | 0.8475 | -6.112 | 9.84E-10 |
| 6 | rs28417075  | 32519013 | T | ADD | 137954 | 1.271  | 6.215  | 5.12E-10 |
| 6 | rs28635588  | 32519041 | G | ADD | 148497 | 1.174  | 5.812  | 6.19E-09 |
| 6 | rs72844144  | 32519125 | A | ADD | 110066 | 0.8408 | -6.219 | 5.00E-10 |
| 6 | rs66532036  | 32519319 | A | ADD | 129272 | 0.854  | -6.74  | 1.58E-11 |
| 6 | rs67000090  | 32519392 | G | ADD | 148622 | 1.169  | 5.763  | 8.25E-09 |
| 6 | rs67600647  | 32519504 | G | ADD | 148628 | 1.169  | 5.766  | 8.14E-09 |
| 6 | rs72492322  | 32519628 | G | ADD | 100348 | 0.8321 | -5.974 | 2.31E-09 |
| 6 | rs72844152  | 32519652 | A | ADD | 127865 | 0.8533 | -6.705 | 2.02E-11 |

|   |             |          |   |     |        |        |        |          |
|---|-------------|----------|---|-----|--------|--------|--------|----------|
| 6 | rs369883062 | 32519734 | G | ADD | 127860 | 0.8552 | -6.647 | 2.99E-11 |
| 6 | rs71536515  | 32519743 | A | ADD | 148614 | 1.169  | 5.785  | 7.27E-09 |
| 6 | rs536146370 | 32519759 | A | ADD | 126970 | 0.8507 | -6.819 | 9.15E-12 |
| 6 | rs73729121  | 32519768 | G | ADD | 148582 | 1.17   | 5.79   | 7.04E-09 |
| 6 | rs73729122  | 32519777 | G | ADD | 126979 | 0.8513 | -6.796 | 1.07E-11 |
| 6 | rs71536516  | 32519823 | T | ADD | 144204 | 1.174  | 5.895  | 3.74E-09 |
| 6 | rs530370261 | 32519826 | T | ADD | 124748 | 0.8515 | -6.674 | 2.49E-11 |
| 6 | rs71536517  | 32519828 | T | ADD | 148449 | 1.169  | 5.778  | 7.58E-09 |
| 6 | rs73397403  | 32519849 | G | ADD | 125708 | 0.8546 | -6.574 | 4.90E-11 |
| 6 | rs115123240 | 32519919 | G | ADD | 127735 | 0.8529 | -6.765 | 1.33E-11 |
| 6 | rs72492324  | 32520018 | T | ADD | 148496 | 1.168  | 5.755  | 8.65E-09 |
| 6 | rs114031016 | 32520035 | T | ADD | 126918 | 1.19   | 7.329  | 2.32E-13 |
| 6 | rs67717173  | 32520137 | T | ADD | 126302 | 0.8547 | -6.642 | 3.10E-11 |
| 6 | rs72492325  | 32520151 | C | ADD | 127839 | 0.8537 | -6.73  | 1.69E-11 |
| 6 | rs116173033 | 32520295 | G | ADD | 120637 | 0.8448 | -6.984 | 2.87E-12 |
| 6 | rs115217308 | 32520296 | A | ADD | 120637 | 0.8448 | -6.984 | 2.87E-12 |
| 6 | rs73729131  | 32520313 | T | ADD | 120637 | 0.8448 | -6.984 | 2.87E-12 |
| 6 | rs67077728  | 32520338 | A | ADD | 148690 | 1.179  | 6.029  | 1.65E-09 |
| 6 | rs71536520  | 32520362 | A | ADD | 148460 | 1.169  | 5.785  | 7.24E-09 |
| 6 | rs72492327  | 32520465 | G | ADD | 127039 | 0.8529 | -6.755 | 1.43E-11 |
| 6 | rs71536521  | 32520558 | A | ADD | 148531 | 1.168  | 5.756  | 8.61E-09 |
| 6 | rs71536522  | 32520583 | A | ADD | 148638 | 1.168  | 5.748  | 9.02E-09 |
| 6 | rs3828852   | 32520595 | A | ADD | 126520 | 0.8542 | -6.672 | 2.53E-11 |
| 6 | rs3828848   | 32520665 | C | ADD | 124736 | 0.8608 | -6.286 | 3.26E-10 |
| 6 | rs66935282  | 32520683 | G | ADD | 148750 | 1.169  | 5.792  | 6.97E-09 |
| 6 | rs66723041  | 32520707 | G | ADD | 148783 | 1.17   | 5.849  | 4.95E-09 |
| 6 | rs376327303 | 32520719 | A | ADD | 122056 | 0.8474 | -6.743 | 1.55E-11 |
| 6 | rs66758173  | 32520729 | G | ADD | 148754 | 1.178  | 6.018  | 1.76E-09 |
| 6 | rs72844171  | 32520749 | C | ADD | 128321 | 0.854  | -6.726 | 1.74E-11 |
| 6 | rs61615404  | 32520785 | T | ADD | 148723 | 1.176  | 5.954  | 2.61E-09 |
| 6 | rs58495148  | 32520816 | G | ADD | 148783 | 1.179  | 6.063  | 1.33E-09 |
| 6 | rs73729138  | 32520854 | G | ADD | 128043 | 0.8567 | -6.583 | 4.61E-11 |
| 6 | rs111343881 | 32521022 | C | ADD | 141332 | 1.138  | 5.886  | 3.95E-09 |
| 6 | rs3828832   | 32521083 | C | ADD | 134250 | 0.86   | -6.319 | 2.63E-10 |
| 6 | rs3828831   | 32521117 | C | ADD | 138807 | 0.8108 | -9.611 | 7.20E-22 |
| 6 | rs35957455  | 32521195 | T | ADD | 126915 | 0.8556 | -6.568 | 5.10E-11 |
| 6 | rs114029309 | 32521341 | G | ADD | 88273  | 1.248  | 7.458  | 8.81E-14 |
| 6 | rs113225456 | 32521406 | T | ADD | 122248 | 0.856  | -6.497 | 8.22E-11 |

|   |             |          |   |     |        |        |        |          |
|---|-------------|----------|---|-----|--------|--------|--------|----------|
| 6 | rs72844187  | 32521419 | G | ADD | 122253 | 0.8558 | -6.505 | 7.78E-11 |
| 6 | rs72844188  | 32521427 | C | ADD | 122253 | 0.8558 | -6.505 | 7.78E-11 |
| 6 | rs66796862  | 32521664 | C | ADD | 122262 | 0.856  | -6.496 | 8.24E-11 |
| 6 | rs538116343 | 32521742 | T | ADD | 109582 | 0.8602 | -5.804 | 6.48E-09 |
| 6 | rs73397416  | 32521951 | C | ADD | 96505  | 0.8416 | -5.849 | 4.93E-09 |
| 6 | rs35697584  | 32522151 | A | ADD | 103036 | 0.8469 | -5.894 | 3.77E-09 |
| 6 | rs117137018 | 32522795 | A | ADD | 114127 | 1.215  | 6.476  | 9.39E-11 |
| 6 | rs35222480  | 32522813 | C | ADD | 62511  | 0.7936 | -5.797 | 6.77E-09 |
| 6 | rs35222480  | 32522813 | A | ADD | 122408 | 1.182  | 5.82   | 5.87E-09 |
| 6 | rs73726814  | 32523235 | C | ADD | 117073 | 0.8595 | -6.128 | 8.92E-10 |
| 6 | rs34405098  | 32523269 | T | ADD | 117092 | 0.8603 | -6.091 | 1.13E-09 |
| 6 | rs35179057  | 32523349 | C | ADD | 107034 | 0.8584 | -5.947 | 2.73E-09 |
| 6 | rs187785448 | 32523396 | T | ADD | 111634 | 1.232  | 6.515  | 7.28E-11 |
| 6 | rs79071881  | 32525686 | T | ADD | 104199 | 1.247  | 6.965  | 3.28E-12 |
| 6 | rs188138917 | 32525964 | T | ADD | 93879  | 1.27   | 6.134  | 8.56E-10 |
| 6 | rs28646006  | 32527793 | T | ADD | 66630  | 0.8226 | -6.038 | 1.56E-09 |
| 6 | rs28819133  | 32527988 | C | ADD | 77836  | 1.195  | 5.768  | 8.03E-09 |
| 6 | rs28793944  | 32528004 | A | ADD | 92327  | 1.189  | 5.984  | 2.17E-09 |
| 6 | rs66777350  | 32528293 | A | ADD | 140121 | 0.8041 | -6.995 | 2.65E-12 |
| 6 | rs67792106  | 32528323 | G | ADD | 140341 | 0.8048 | -6.967 | 3.25E-12 |
| 6 | rs66491634  | 32528457 | G | ADD | 90726  | 1.192  | 6.063  | 1.33E-09 |
| 6 | rs68110554  | 32528475 | G | ADD | 91486  | 1.194  | 6.072  | 1.26E-09 |
| 6 | rs66502252  | 32528521 | G | ADD | 91239  | 1.192  | 5.997  | 2.01E-09 |
| 6 | rs28796313  | 32528538 | T | ADD | 96896  | 1.231  | 7.598  | 3.01E-14 |
| 6 | rs28835301  | 32528570 | G | ADD | 140895 | 0.8092 | -6.908 | 4.91E-12 |
| 6 | rs28848198  | 32529106 | G | ADD | 98659  | 0.789  | -7.009 | 2.40E-12 |
| 6 | rs113474692 | 32529177 | G | ADD | 89638  | 1.21   | 6.873  | 6.28E-12 |
| 6 | rs28809558  | 32529190 | G | ADD | 89725  | 1.191  | 6.002  | 1.95E-09 |
| 6 | rs78953426  | 32529417 | C | ADD | 91877  | 1.195  | 6.15   | 7.75E-10 |
| 6 | rs68115965  | 32529669 | C | ADD | 139540 | 0.8024 | -7.036 | 1.98E-12 |
| 6 | rs78506734  | 32529695 | T | ADD | 139807 | 0.8055 | -6.93  | 4.22E-12 |
| 6 | rs75094512  | 32529708 | T | ADD | 92026  | 1.193  | 6.061  | 1.36E-09 |
| 6 | rs75184770  | 32529709 | G | ADD | 91536  | 1.194  | 6.104  | 1.04E-09 |
| 6 | rs34067190  | 32529806 | T | ADD | 141116 | 0.8056 | -6.795 | 1.08E-11 |
| 6 | rs35175534  | 32530029 | C | ADD | 119737 | 1.268  | 6.85   | 7.38E-12 |
| 6 | rs34812354  | 32530046 | T | ADD | 91948  | 1.192  | 6.022  | 1.72E-09 |
| 6 | rs35772438  | 32530407 | C | ADD | 91287  | 1.188  | 5.883  | 4.04E-09 |
| 6 | rs67240795  | 32530458 | C | ADD | 91373  | 1.194  | 6.036  | 1.58E-09 |

|   |               |          |   |     |        |        |        |          |
|---|---------------|----------|---|-----|--------|--------|--------|----------|
| 6 | rs67979569    | 32530540 | T | ADD | 91298  | 1.191  | 5.904  | 3.55E-09 |
| 6 | rs76564265    | 32530582 | G | ADD | 91232  | 1.191  | 5.901  | 3.62E-09 |
| 6 | rs35021449    | 32530583 | T | ADD | 130170 | 1.298  | 6.921  | 4.47E-12 |
| 6 | rs66874970    | 32530748 | C | ADD | 91534  | 1.195  | 6.13   | 8.78E-10 |
| 6 | rs67454457    | 32530767 | G | ADD | 91510  | 1.196  | 6.153  | 7.59E-10 |
| 6 | rs67455807    | 32530881 | A | ADD | 91229  | 1.197  | 6.173  | 6.68E-10 |
| 6 | rs67387464    | 32530892 | C | ADD | 91182  | 1.196  | 6.159  | 7.31E-10 |
| 6 | rs66869156    | 32531295 | T | ADD | 91013  | 1.192  | 5.936  | 2.92E-09 |
| 6 | rs67829983    | 32531335 | C | ADD | 90991  | 1.192  | 5.931  | 3.01E-09 |
| 6 | rs71536570    | 32531422 | C | ADD | 90959  | 1.193  | 5.96   | 2.53E-09 |
| 6 | rs67927015    | 32531442 | T | ADD | 90956  | 1.193  | 5.965  | 2.44E-09 |
| 6 | rs116100204   | 32531556 | C | ADD | 90531  | 1.199  | 6.271  | 3.59E-10 |
| 6 | rs143553568   | 32531583 | T | ADD | 135983 | 0.8271 | -5.755 | 8.65E-09 |
| 6 | rs35603463    | 32531745 | T | ADD | 70798  | 1.234  | 6.771  | 1.28E-11 |
| 6 | rs34105415    | 32532251 | T | ADD | 90411  | 1.189  | 5.948  | 2.71E-09 |
| 6 | rs36054655    | 32532260 | C | ADD | 90411  | 1.189  | 5.948  | 2.71E-09 |
| 6 | rs71536576    | 32532346 | G | ADD | 90890  | 1.189  | 5.955  | 2.60E-09 |
| 6 | rs71536577    | 32532356 | T | ADD | 90999  | 1.19   | 5.967  | 2.41E-09 |
| 6 | rs35115714    | 32532460 | C | ADD | 90610  | 1.192  | 5.965  | 2.44E-09 |
| 6 | rs35855915    | 32532691 | G | ADD | 90319  | 1.193  | 5.983  | 2.19E-09 |
| 6 | rs71536582    | 32533078 | G | ADD | 90492  | 1.196  | 6.095  | 1.10E-09 |
| 6 | rs67336789    | 32533094 | T | ADD | 90273  | 1.193  | 5.956  | 2.59E-09 |
| 6 | rs71536584    | 32533116 | C | ADD | 90123  | 1.191  | 5.925  | 3.12E-09 |
| 6 | rs71536585    | 32533131 | G | ADD | 90117  | 1.191  | 5.925  | 3.12E-09 |
| 6 | rs2284185     | 32533271 | G | ADD | 134436 | 0.8205 | -5.8   | 6.62E-09 |
| 6 | rs67410451    | 32533352 | A | ADD | 90051  | 1.19   | 5.923  | 3.17E-09 |
| 6 | rs141022812   | 32533567 | G | ADD | 88981  | 1.191  | 6.03   | 1.65E-09 |
| 6 | rs71536590    | 32533587 | A | ADD | 90322  | 1.191  | 5.943  | 2.80E-09 |
| 6 | rs79498062    | 32533785 | A | ADD | 90358  | 1.197  | 6.202  | 5.58E-10 |
| 6 | rs75729173    | 32533813 | C | ADD | 90323  | 1.197  | 6.193  | 5.90E-10 |
| 6 | rs77052117    | 32533886 | C | ADD | 90349  | 1.199  | 6.236  | 4.48E-10 |
| 6 | rs79749596    | 32534021 | T | ADD | 78495  | 1.195  | 5.87   | 4.35E-09 |
| 6 | rs71538515    | 32535300 | A | ADD | 89322  | 1.198  | 6.193  | 5.89E-10 |
| 6 | rs11752277    | 32537771 | G | ADD | 100701 | 1.24   | 6.827  | 8.67E-12 |
| 6 | 6:32537804_G_ |          |   |     |        |        |        |          |
| 6 | T             | 32537804 | T | ADD | 138661 | 1.291  | 6.527  | 6.73E-11 |
| 6 | rs9269326     | 32539996 | A | ADD | 86207  | 1.194  | 6.033  | 1.61E-09 |
| 6 | rs369515426   | 32542282 | G | ADD | 127297 | 1.195  | 7.211  | 5.57E-13 |
| 6 | rs575662827   | 32543874 | C | ADD | 128801 | 1.273  | 6.453  | 1.09E-10 |

|   |             |          |   |     |        |        |        |          |
|---|-------------|----------|---|-----|--------|--------|--------|----------|
| 6 | rs9269542   | 32544042 | G | ADD | 80030  | 1.222  | 6.688  | 2.26E-11 |
| 6 | rs9269543   | 32544061 | T | ADD | 105812 | 1.195  | 5.872  | 4.30E-09 |
| 6 | rs796139742 | 32544107 | G | ADD | 136884 | 1.292  | 6.669  | 2.57E-11 |
| 6 | rs9269547   | 32544173 | T | ADD | 100505 | 1.188  | 6.016  | 1.79E-09 |
| 6 | rs35511257  | 32545392 | C | ADD | 133860 | 1.273  | 6.456  | 1.07E-10 |
| 6 | rs1141883   | 32546592 | A | ADD | 100642 | 1.204  | 6.765  | 1.33E-11 |
| 6 | rs1064695   | 32546833 | A | ADD | 117257 | 1.196  | 6.629  | 3.38E-11 |
| 6 | rs35445101  | 32546879 | G | ADD | 148783 | 1.134  | 5.809  | 6.28E-09 |
| 6 | rs9269702   | 32547143 | G | ADD | 110744 | 1.198  | 6.077  | 1.23E-09 |
| 6 | rs9256938   | 32547194 | C | ADD | 100941 | 1.179  | 5.841  | 5.17E-09 |
| 6 | rs141267330 | 32548054 | G | ADD | 136262 | 1.303  | 6.862  | 6.78E-12 |
| 6 | rs9269749   | 32548136 | G | ADD | 146090 | 0.8626 | -6.571 | 4.99E-11 |
| 6 | rs28732284  | 32548667 | C | ADD | 143500 | 1.137  | 5.776  | 7.66E-09 |
| 6 | rs28732291  | 32548697 | G | ADD | 143610 | 1.136  | 5.735  | 9.75E-09 |
| 6 | rs9269771   | 32548734 | T | ADD | 107099 | 1.252  | 7.938  | 2.06E-15 |
| 6 | rs28732302  | 32548855 | C | ADD | 146162 | 1.136  | 5.853  | 4.83E-09 |
| 6 | rs9269792   | 32549128 | C | ADD | 99128  | 1.251  | 8.107  | 5.20E-16 |
| 6 | rs9269798   | 32549296 | A | ADD | 134363 | 1.179  | 5.829  | 5.58E-09 |
| 6 | rs9269799   | 32549313 | G | ADD | 143409 | 1.232  | 9.683  | 3.56E-22 |
| 6 | rs701831    | 32549401 | T | ADD | 117050 | 1.183  | 5.734  | 9.80E-09 |
| 6 | rs112796209 | 32549531 | C | ADD | 116489 | 1.251  | 6.602  | 4.06E-11 |
| 6 | rs1059351   | 32549540 | T | ADD | 123316 | 1.224  | 7.728  | 1.10E-14 |
| 6 | rs35095850  | 32549935 | G | ADD | 145485 | 1.143  | 6.116  | 9.58E-10 |
| 6 | rs34835435  | 32549966 | G | ADD | 135867 | 1.152  | 6.133  | 8.60E-10 |
| 6 | rs28723989  | 32550116 | T | ADD | 139693 | 1.14   | 5.784  | 7.31E-09 |
| 6 | rs35789108  | 32550126 | G | ADD | 109217 | 1.173  | 6.266  | 3.71E-10 |
| 6 | rs33927408  | 32550420 | T | ADD | 123992 | 1.188  | 6.803  | 1.02E-11 |
| 6 | rs28724008  | 32550550 | G | ADD | 148783 | 1.132  | 5.735  | 9.78E-09 |
| 6 | rs9269873   | 32550796 | A | ADD | 125535 | 0.86   | -6.351 | 2.14E-10 |
| 6 | rs28724031  | 32550819 | A | ADD | 145463 | 1.139  | 5.946  | 2.75E-09 |
| 6 | rs9269915   | 32551453 | G | ADD | 125849 | 1.252  | 8.961  | 3.23E-19 |
| 6 | rs1064664   | 32552075 | G | ADD | 95962  | 0.8373 | -6.202 | 5.59E-10 |
| 6 | rs9269968   | 32552251 | G | ADD | 98150  | 1.21   | 7.023  | 2.17E-12 |
| 6 | rs34951355  | 32552416 | A | ADD | 130856 | 1.167  | 6.472  | 9.67E-11 |
| 6 | rs113600317 | 32553125 | T | ADD | 146378 | 1.137  | 5.891  | 3.85E-09 |
| 6 | rs9270051   | 32553751 | T | ADD | 143998 | 1.178  | 5.822  | 5.81E-09 |
| 6 | rs9270052   | 32553807 | G | ADD | 104912 | 1.18   | 5.935  | 2.94E-09 |
| 6 | rs200771848 | 32553816 | T | ADD | 145371 | 1.142  | 6.042  | 1.52E-09 |

|   |                    |          |   |     |        |        |        |          |
|---|--------------------|----------|---|-----|--------|--------|--------|----------|
| 6 | rs113322920        | 32553849 | C | ADD | 135181 | 1.195  | 7.034  | 2.01E-12 |
| 6 | rs9270081          | 32554243 | T | ADD | 98989  | 1.198  | 6.292  | 3.14E-10 |
| 6 | rs113608847        | 32554284 | G | ADD | 126426 | 1.274  | 8.718  | 2.84E-18 |
| 6 | rs9270104          | 32554726 | A | ADD | 133057 | 1.242  | 8.673  | 4.22E-18 |
| 6 | rs76533559         | 32554897 | G | ADD | 131866 | 0.8534 | -6.486 | 8.80E-11 |
| 6 | rs9270123          | 32555032 | G | ADD | 94712  | 1.21   | 6.645  | 3.04E-11 |
| 6 | rs9270126          | 32555052 | T | ADD | 132466 | 0.86   | -6.354 | 2.10E-10 |
| 6 | rs13207809         | 32555239 | C | ADD | 128145 | 1.271  | 7.073  | 1.52E-12 |
| 6 | 6:32555367_C_A     | 32555367 | A | ADD | 133826 | 0.528  | -6.301 | 2.96E-10 |
| 6 | rs9270152          | 32555376 | T | ADD | 69851  | 0.7651 | -8.243 | 1.68E-16 |
| 6 | rs9270154          | 32555389 | G | ADD | 92749  | 0.8133 | -5.906 | 3.50E-09 |
| 6 | rs34977123         | 32555736 | G | ADD | 124163 | 1.248  | 6.754  | 1.44E-11 |
| 6 | rs34578704         | 32555779 | A | ADD | 132028 | 1.287  | 8.286  | 1.18E-16 |
| 6 | rs5000802          | 32555832 | C | ADD | 89122  | 1.192  | 6.163  | 7.13E-10 |
| 6 | rs9270182          | 32555833 | A | ADD | 137773 | 1.182  | 5.873  | 4.29E-09 |
| 6 | 6:32555855_CT_TT_C | 32555855 | C | ADD | 134179 | 0.8707 | -5.988 | 2.13E-09 |
| 6 | rs145244672        | 32556461 | G | ADD | 121469 | 1.25   | 6.134  | 8.54E-10 |
| 6 | rs35331833         | 32556635 | A | ADD | 128948 | 1.156  | 6.111  | 9.90E-10 |
| 6 | rs113650892        | 32557163 | A | ADD | 121082 | 1.201  | 7.078  | 1.46E-12 |
| 6 | rs9270270          | 32557208 | T | ADD | 134888 | 1.183  | 5.731  | 9.99E-09 |
|   |                    |          | G |     |        |        |        |          |
| 6 | rs566639334        | 32557269 | T | ADD | 135585 | 0.8592 | -6.447 | 1.14E-10 |
| 6 | rs201931294        | 32557626 | A | ADD | 120455 | 1.209  | 5.812  | 6.18E-09 |
| 6 | rs9270363          | 32558137 | T | ADD | 137941 | 0.8714 | -6.003 | 1.94E-09 |
| 6 | rs9270387          | 32558317 | C | ADD | 116449 | 0.8578 | -6.301 | 2.95E-10 |
|   |                    |          | A |     |        |        |        |          |
|   |                    |          | A |     |        |        |        |          |
|   |                    |          | C |     |        |        |        |          |
|   |                    |          | A |     |        |        |        |          |
| 6 | rs367562112        | 32558766 | G | ADD | 140521 | 1.248  | 8.173  | 3.00E-16 |
| 6 | rs9270454          | 32558862 | G | ADD | 142753 | 1.18   | 5.879  | 4.12E-09 |
| 6 | rs77122291         | 32559019 | A | ADD | 147682 | 1.134  | 5.784  | 7.29E-09 |
| 6 | rs115879259        | 32559213 | T | ADD | 131056 | 1.27   | 7.592  | 3.15E-14 |
| 6 | 6:32559256_TG_T    | 32559256 | T | ADD | 144053 | 0.8681 | -6.274 | 3.53E-10 |
| 6 | rs34958241         | 32559575 | G | ADD | 137517 | 1.231  | 7.485  | 7.18E-14 |
| 6 | rs34784936         | 32559648 | T | ADD | 137442 | 1.233  | 7.557  | 4.13E-14 |
| 6 | rs9270529          | 32559658 | T | ADD | 137435 | 0.8745 | -5.809 | 6.28E-09 |
| 6 | rs9270530          | 32559686 | A | ADD | 137701 | 0.8733 | -5.874 | 4.24E-09 |
| 6 | rs34066151         | 32559702 | G | ADD | 137607 | 1.236  | 7.668  | 1.74E-14 |
| 6 | rs9270533          | 32559709 | T | ADD | 137922 | 0.873  | -5.893 | 3.79E-09 |

|   |                                 |          |   |     |        |        |        |          |
|---|---------------------------------|----------|---|-----|--------|--------|--------|----------|
| 6 | rs35299998                      | 32559710 | T | ADD | 137607 | 1.236  | 7.668  | 1.74E-14 |
| 6 | rs9270535                       | 32559714 | A | ADD | 137921 | 0.873  | -5.893 | 3.79E-09 |
| 6 | rs9270538                       | 32559758 | A | ADD | 144870 | 0.8633 | -6.521 | 6.98E-11 |
| 6 | rs28366267                      | 32559781 | C | ADD | 148096 | 1.134  | 5.771  | 7.89E-09 |
| 6 | rs34855541                      | 32559825 | G | ADD | 148107 | 1.227  | 8.053  | 8.06E-16 |
| 6 | rs9270540                       | 32559848 | C | ADD | 144555 | 0.8624 | -6.56  | 5.40E-11 |
| 6 | rs9270541                       | 32559864 | T | ADD | 147345 | 0.8646 | -6.511 | 7.46E-11 |
| 6 | rs28366268                      | 32559874 | G | ADD | 145398 | 1.135  | 5.79   | 7.02E-09 |
| 6 | rs9270543                       | 32559881 | A | ADD | 144623 | 0.8638 | -6.491 | 8.54E-11 |
| 6 | rs9270544                       | 32559882 | T | ADD | 144623 | 0.8638 | -6.491 | 8.54E-11 |
| 6 | rs35743245                      | 32559904 | T | ADD | 146039 | 1.224  | 7.864  | 3.72E-15 |
| 6 | rs9270547                       | 32559951 | G | ADD | 145273 | 0.8629 | -6.553 | 5.63E-11 |
| 6 | rs9270548                       | 32559960 | T | ADD | 145265 | 0.8631 | -6.544 | 6.01E-11 |
| 6 | rs73729339                      | 32560017 | A | ADD | 144700 | 0.8627 | -6.545 | 5.95E-11 |
| 6 | rs36096565                      | 32560025 | G | ADD | 135277 | 1.218  | 7.61   | 2.75E-14 |
| 6 | rs35972518                      | 32560026 | G | ADD | 146302 | 1.219  | 7.735  | 1.04E-14 |
| 6 | rs35917796                      | 32560028 | T | ADD | 146340 | 1.219  | 7.743  | 9.71E-15 |
| 6 | rs35380574                      | 32560051 | T | ADD | 146382 | 1.219  | 7.751  | 9.13E-15 |
| 6 | rs74207277                      | 32560091 | T | ADD | 144830 | 0.8628 | -6.543 | 6.01E-11 |
| 6 | rs73729340                      | 32560155 | A | ADD | 145123 | 0.863  | -6.54  | 6.13E-11 |
| 6 | 6:32560182_A<br>GTCACTATT_<br>A | 32560182 | A | ADD | 147524 | 1.225  | 7.956  | 1.78E-15 |
| 6 | rs35395738                      | 32560209 | C | ADD | 139391 | 1.208  | 7.343  | 2.08E-13 |
| 6 | rs71542413                      | 32560240 | T | ADD | 145257 | 0.8623 | -6.575 | 4.87E-11 |
| 6 | rs71542414                      | 32560247 | G | ADD | 145277 | 0.8618 | -6.599 | 4.13E-11 |
| 6 | 6:32560270_CA<br>GG_C           | 32560270 | C | ADD | 145405 | 0.8612 | -6.636 | 3.23E-11 |
| 6 | rs71542415                      | 32560298 | C | ADD | 145377 | 0.8618 | -6.603 | 4.03E-11 |
| 6 | rs74921648                      | 32560307 | A | ADD | 145415 | 0.8614 | -6.623 | 3.52E-11 |
| 6 | rs36207014                      | 32560332 | A | ADD | 145445 | 0.8611 | -6.637 | 3.20E-11 |
| 6 | rs34539464                      | 32560339 | G | ADD | 145404 | 0.8608 | -6.65  | 2.94E-11 |
| 6 | rs79966773                      | 32560341 | C | ADD | 137491 | 0.8506 | -6.156 | 7.48E-10 |
| 6 | rs35472547                      | 32560370 | T | ADD | 147238 | 1.224  | 7.962  | 1.69E-15 |
| 6 | rs34291045                      | 32560385 | T | ADD | 129294 | 1.288  | 7.783  | 7.06E-15 |
| 6 | rs34939562                      | 32560388 | A | ADD | 147255 | 1.224  | 7.94   | 2.03E-15 |
| 6 | rs9270550                       | 32560441 | G | ADD | 142617 | 0.8662 | -6.328 | 2.49E-10 |
| 6 | rs34924558                      | 32560446 | T | ADD | 142839 | 1.225  | 7.581  | 3.44E-14 |
| 6 | rs34496598                      | 32560455 | T | ADD | 142914 | 1.224  | 7.556  | 4.15E-14 |
| 6 | rs34415150                      | 32560477 | G | ADD | 145161 | 1.244  | 8.408  | 4.15E-17 |



|   |                     |          |   |     |        |        |        |          |
|---|---------------------|----------|---|-----|--------|--------|--------|----------|
| 6 | rs9270556           | 32560606 | A | ADD | 147785 | 0.8636 | -6.563 | 5.28E-11 |
| 6 | rs35118762          | 32560631 | T | ADD | 148311 | 1.224  | 7.965  | 1.66E-15 |
| 6 | rs9270558           | 32560667 | A | ADD | 142078 | 0.8674 | -6.254 | 4.00E-10 |
| 6 | rs34928543          | 32560695 | C | ADD | 148178 | 1.225  | 7.988  | 1.38E-15 |
| 6 | rs9270559           | 32560698 | G | ADD | 141739 | 0.8662 | -6.328 | 2.48E-10 |
| 6 | rs28366296          | 32560727 | A | ADD | 141007 | 1.147  | 6.1    | 1.06E-09 |
| 6 | rs6910879           | 32560739 | G | ADD | 137841 | 1.289  | 6.935  | 4.06E-12 |
| 6 | rs2760975           | 32560771 | A | ADD | 120828 | 1.239  | 6.757  | 1.41E-11 |
| 6 | rs28366302          | 32560934 | C | ADD | 148783 | 1.133  | 5.749  | 8.98E-09 |
| 6 | rs28366303          | 32560963 | G | ADD | 148460 | 1.133  | 5.757  | 8.55E-09 |
| 6 | rs9270570           | 32560978 | G | ADD | 146935 | 0.8646 | -6.495 | 8.29E-11 |
| 6 | 6:32560993_TA<br>_T | 32560993 | T | ADD | 148515 | 1.134  | 5.791  | 7.01E-09 |
| 6 | rs28366307          | 32560995 | C | ADD | 148515 | 1.134  | 5.791  | 7.01E-09 |
| 6 | rs9270576           | 32561068 | T | ADD | 124737 | 0.856  | -5.982 | 2.21E-09 |
| 6 | rs9270580           | 32561123 | C | ADD | 143130 | 0.8639 | -6.474 | 9.55E-11 |
| 6 | rs35074855          | 32561140 | G | ADD | 130577 | 1.297  | 7.442  | 9.93E-14 |
| 6 | rs28366312          | 32561175 | C | ADD | 137983 | 1.149  | 6.021  | 1.73E-09 |
| 6 | rs28366313          | 32561186 | A | ADD | 137248 | 1.163  | 6.525  | 6.78E-11 |
| 6 | rs28366314          | 32561201 | G | ADD | 134097 | 1.177  | 6.827  | 8.69E-12 |
| 6 | rs28366315          | 32561207 | T | ADD | 145926 | 1.139  | 5.938  | 2.89E-09 |
| 6 | rs9270583           | 32561229 | G | ADD | 137843 | 0.8589 | -6.641 | 3.11E-11 |
| 6 | rs28366316          | 32561246 | C | ADD | 140173 | 1.152  | 6.266  | 3.69E-10 |
| 6 | rs35525122          | 32561283 | A | ADD | 148563 | 1.225  | 8.006  | 1.19E-15 |
| 6 | rs9270585           | 32561300 | C | ADD | 148196 | 1.163  | 7.134  | 9.78E-13 |
| 6 | rs9270588           | 32561327 | C | ADD | 147827 | 1.159  | 6.982  | 2.90E-12 |
| 6 | rs35265698          | 32561334 | G | ADD | 148218 | 1.224  | 7.971  | 1.57E-15 |
| 6 | rs9270589           | 32561390 | T | ADD | 147961 | 0.8666 | -6.425 | 1.32E-10 |
| 6 | rs9270590           | 32561392 | A | ADD | 146459 | 0.8631 | -6.54  | 6.14E-11 |
| 6 | rs9270591           | 32561424 | C | ADD | 146046 | 1.162  | 7.061  | 1.65E-12 |
| 6 | rs9270592           | 32561429 | T | ADD | 145697 | 0.8627 | -6.543 | 6.05E-11 |
| 6 | rs9270593           | 32561445 | G | ADD | 145602 | 0.8629 | -6.532 | 6.51E-11 |
| 6 | rs34350244          | 32561465 | T | ADD | 144885 | 1.234  | 8.238  | 1.75E-16 |
| 6 | rs35294087          | 32561466 | G | ADD | 148211 | 1.224  | 7.97   | 1.59E-15 |
| 6 | 6:32561468_TA<br>_T | 32561468 | T | ADD | 148472 | 1.226  | 8.013  | 1.12E-15 |
| 6 | rs28366319          | 32561495 | A | ADD | 148194 | 1.133  | 5.753  | 8.75E-09 |
| 6 | rs34535888          | 32561527 | C | ADD | 148405 | 1.227  | 8.05   | 8.28E-16 |
| 6 | rs34553045          | 32561565 | C | ADD | 140053 | 1.264  | 8.55   | 1.23E-17 |
| 6 | rs76288224          | 32561566 | G | ADD | 147182 | 0.7661 | -5.78  | 7.48E-09 |

|   |             |          |   |     |        |        |        |          |
|---|-------------|----------|---|-----|--------|--------|--------|----------|
| 6 | rs35371668  | 32561638 | T | ADD | 142445 | 1.246  | 8.211  | 2.19E-16 |
| 6 | rs28366327  | 32561678 | A | ADD | 148526 | 1.134  | 5.78   | 7.48E-09 |
| 6 | rs34647096  | 32561681 | A | ADD | 148391 | 1.224  | 7.974  | 1.53E-15 |
| 6 | rs28366328  | 32561766 | G | ADD | 148305 | 1.133  | 5.76   | 8.43E-09 |
| 6 | rs188575117 | 32561935 | C | ADD | 135943 | 1.249  | 7.701  | 1.35E-14 |
| 6 | rs28366358  | 32565164 | G | ADD | 133042 | 1.161  | 6.345  | 2.22E-10 |
| 6 | rs2760980   | 32565201 | A | ADD | 141865 | 1.221  | 7.359  | 1.86E-13 |
| 6 | rs2760981   | 32565465 | A | ADD | 125419 | 0.8527 | -6.911 | 4.82E-12 |
| 6 | rs2760983   | 32565601 | G | ADD | 146977 | 1.232  | 8.12   | 4.67E-16 |
|   |             |          | T |     |        |        |        |          |
|   |             |          | C |     |        |        |        |          |
|   |             |          | C |     |        |        |        |          |
|   |             |          | T |     |        |        |        |          |
| 6 | rs113134061 | 32566041 | C | ADD | 148312 | 1.227  | 8.056  | 7.91E-16 |
| 6 | rs62405651  | 32566296 | C | ADD | 147570 | 0.6113 | -7.949 | 1.88E-15 |
| 6 | rs2760984   | 32566329 | C | ADD | 142250 | 1.246  | 8.164  | 3.23E-16 |
| 6 | rs2760985   | 32566398 | A | ADD | 148314 | 1.227  | 8.049  | 8.33E-16 |
| 6 | rs2454139   | 32566635 | C | ADD | 143484 | 1.224  | 7.565  | 3.89E-14 |
| 6 | rs687308    | 32567256 | T | ADD | 148348 | 1.226  | 8.046  | 8.54E-16 |
| 6 | rs142264362 | 32567283 | A | ADD | 148557 | 0.6186 | -8.094 | 5.75E-16 |
| 6 | rs9689000   | 32567308 | G | ADD | 148433 | 0.6875 | -7.125 | 1.04E-12 |
| 6 | rs112481371 | 32567551 | G | ADD | 148045 | 0.6896 | -6.985 | 2.85E-12 |
| 6 | rs62405652  | 32567784 | C | ADD | 148032 | 0.6886 | -7.005 | 2.48E-12 |
| 6 | rs35117964  | 32568146 | G | ADD | 139722 | 1.242  | 8.026  | 1.00E-15 |
| 6 | rs9270747   | 32568292 | A | ADD | 142247 | 1.262  | 10.43  | 1.78E-25 |
| 6 | rs34117221  | 32568324 | G | ADD | 142327 | 1.227  | 7.573  | 3.65E-14 |
| 6 | rs34331363  | 32568439 | T | ADD | 138744 | 1.217  | 6.959  | 3.43E-12 |
| 6 | rs35226637  | 32568448 | A | ADD | 137307 | 1.221  | 7.045  | 1.85E-12 |
| 6 | rs35653258  | 32568783 | A | ADD | 138688 | 1.218  | 6.983  | 2.89E-12 |
| 6 | rs537365538 | 32569261 | A | ADD | 148464 | 0.6886 | -7.111 | 1.15E-12 |
| 6 | rs2647059   | 32569362 | C | ADD | 144494 | 1.218  | 7.438  | 1.02E-13 |
|   |             |          | C |     |        |        |        |          |
| 6 | rs576777795 | 32569435 | A | ADD | 140244 | 0.7637 | -7.464 | 8.41E-14 |
| 6 | rs9270806   | 32569563 | T | ADD | 146818 | 0.861  | -6.693 | 2.18E-11 |
| 6 | rs9270807   | 32569572 | A | ADD | 146821 | 0.861  | -6.694 | 2.18E-11 |
| 6 | rs11757382  | 32569637 | C | ADD | 147269 | 0.7999 | -6.662 | 2.71E-11 |
| 6 | rs477515    | 32569691 | A | ADD | 148353 | 1.14   | 6.025  | 1.69E-09 |
| 6 | rs6938929   | 32569712 | A | ADD | 146019 | 0.7991 | -6.589 | 4.42E-11 |
| 6 | rs476775    | 32569722 | T | ADD | 147092 | 0.8613 | -6.687 | 2.28E-11 |
| 6 | rs476602    | 32569792 | C | ADD | 146651 | 0.8614 | -6.676 | 2.46E-11 |
| 6 | rs622137    | 32569852 | A | ADD | 143967 | 1.14   | 5.883  | 4.02E-09 |

|   |                        |          |        |     |        |        |        |          |
|---|------------------------|----------|--------|-----|--------|--------|--------|----------|
| 6 | rs116067873            | 32569953 | T      | ADD | 148586 | 0.62   | -8.083 | 6.33E-16 |
| 6 | rs535476317            | 32570019 | A      | ADD | 147409 | 1.142  | 6.067  | 1.30E-09 |
| 6 | rs2516052              | 32570147 | G      | ADD | 146940 | 1.142  | 6.024  | 1.70E-09 |
| 6 | rs2516051              | 32570184 | T      | ADD | 146354 | 1.142  | 6.046  | 1.49E-09 |
| 6 | 6:32570261_A<br>G_A    | 32570261 | A      | ADD | 146736 | 0.8611 | -6.688 | 2.26E-11 |
| 6 | rs34039593             | 32570311 | G      | ADD | 148353 | 1.225  | 8.009  | 1.16E-15 |
| 6 | rs2516050              | 32570352 | A      | ADD | 148015 | 0.862  | -6.677 | 2.44E-11 |
| 6 | rs2647062              | 32570417 | C      | ADD | 137250 | 1.228  | 7.144  | 9.06E-13 |
| 6 | rs558721               | 32570573 | T      | ADD | 143800 | 1.222  | 7.534  | 4.91E-14 |
| 6 | rs9281920              | 32570947 | T<br>G | ADD | 146794 | 0.8594 | -6.771 | 1.28E-11 |
| 6 | rs679242               | 32570958 | T      | ADD | 143864 | 1.223  | 7.576  | 3.56E-14 |
| 6 | rs679243               | 32570959 | T      | ADD | 146669 | 0.8602 | -6.724 | 1.77E-11 |
| 6 | rs9270862              | 32570981 | C      | ADD | 145336 | 0.8595 | -6.743 | 1.55E-11 |
| 6 | rs9270863              | 32570982 | A      | ADD | 145336 | 0.8595 | -6.743 | 1.55E-11 |
| 6 | rs680061               | 32571098 | G      | ADD | 143126 | 0.8642 | -6.426 | 1.31E-10 |
| 6 | 6:32571102_CT<br>_C    | 32571102 | C      | ADD | 145055 | 0.8581 | -6.775 | 1.24E-11 |
| 6 | rs2760990              | 32571110 | A      | ADD | 143860 | 1.223  | 7.581  | 3.42E-14 |
| 6 | rs28383179             | 32571116 | A      | ADD | 145056 | 1.142  | 6.04   | 1.54E-09 |
| 6 | rs28383180             | 32571118 | C      | ADD | 145053 | 1.142  | 6.037  | 1.57E-09 |
| 6 | rs2647066              | 32571122 | T      | ADD | 148393 | 1.226  | 8.021  | 1.05E-15 |
| 6 | rs9270869              | 32571155 | C      | ADD | 146705 | 0.8608 | -6.702 | 2.05E-11 |
| 6 | rs9270871              | 32571160 | G      | ADD | 146706 | 0.8608 | -6.701 | 2.07E-11 |
| 6 | rs9270876              | 32571314 | A      | ADD | 144711 | 0.8614 | -6.604 | 4.00E-11 |
| 6 | rs9270877              | 32571318 | G      | ADD | 144708 | 0.8614 | -6.603 | 4.04E-11 |
| 6 | rs9270878              | 32571320 | A      | ADD | 144708 | 0.8614 | -6.603 | 4.04E-11 |
| 6 | rs28383181             | 32571669 | T      | ADD | 147461 | 1.142  | 6.057  | 1.39E-09 |
| 6 | rs9270884              | 32571734 | G      | ADD | 123881 | 0.8651 | -6.082 | 1.19E-09 |
| 6 | rs28383182             | 32571811 | A      | ADD | 125552 | 1.175  | 6.324  | 2.54E-10 |
| 6 | rs12211942             | 32571897 | G      | ADD | 131814 | 1.161  | 6.417  | 1.39E-10 |
| 6 | rs17425622             | 32571961 | C      | ADD | 146408 | 1.228  | 8.056  | 7.86E-16 |
| 6 | rs146910480            | 32572023 | G<br>C | ADD | 144152 | 0.8015 | -6.267 | 3.68E-10 |
| 6 | rs585305               | 32572048 | T      | ADD | 147164 | 1.142  | 6.068  | 1.30E-09 |
| 6 | rs34102154             | 32572106 | A      | ADD | 147905 | 0.8051 | -6.536 | 6.32E-11 |
| 6 | rs586610               | 32572311 | C      | ADD | 136319 | 1.165  | 6.469  | 9.86E-11 |
| 6 | rs601148               | 32573265 | T      | ADD | 144607 | 1.224  | 7.79   | 6.71E-15 |
| 6 | rs601945               | 32573415 | G      | ADD | 148203 | 1.227  | 8.042  | 8.83E-16 |
| 6 | 6:32573456_TA<br>ATC_T | 32573456 | T      | ADD | 148679 | 0.6883 | -7.146 | 8.90E-13 |

|   |                       |          |   |     |        |        |        |          |
|---|-----------------------|----------|---|-----|--------|--------|--------|----------|
| 6 | rs602457              | 32573562 | C | ADD | 137228 | 1.249  | 7.784  | 7.03E-15 |
| 6 | rs34242956            | 32574132 | A | ADD | 148674 | 0.6883 | -7.129 | 1.02E-12 |
| 6 | rs2647074             | 32574360 | T | ADD | 148324 | 0.8368 | -7.666 | 1.78E-14 |
| 6 | rs113315602           | 32574575 | C | ADD | 136754 | 1.24   | 5.877  | 4.18E-09 |
| 6 | rs515185              | 32574742 | A | ADD | 148615 | 1.221  | 7.877  | 3.35E-15 |
| 6 | rs628754              | 32574787 | A | ADD | 148000 | 0.8616 | -6.684 | 2.33E-11 |
| 6 | rs7760841             | 32574868 | T | ADD | 137248 | 1.24   | 7.548  | 4.43E-14 |
| 6 | rs7770010             | 32574896 | A | ADD | 148591 | 1.223  | 7.932  | 2.16E-15 |
| 6 | rs7761182             | 32575099 | T | ADD | 148643 | 1.221  | 7.883  | 3.20E-15 |
| 6 | rs113742050           | 32575432 | T | ADD | 141293 | 1.275  | 6.729  | 1.71E-11 |
| 6 | rs4713555             | 32575524 | T | ADD | 148420 | 0.8603 | -6.093 | 1.11E-09 |
| 6 | rs116454087           | 32575602 | G | ADD | 148733 | 0.6252 | -7.978 | 1.49E-15 |
| 6 | rs3021304             | 32575658 | C | ADD | 148783 | 0.879  | -6.042 | 1.52E-09 |
| 6 | rs188053776           | 32577014 | T | ADD | 147177 | 0.6404 | -7.662 | 1.83E-14 |
| 6 | 6:32577088_TC<br>_T   | 32577088 | T | ADD | 131152 | 1.288  | 7.308  | 2.72E-13 |
| 6 | 6:32577107_TA<br>AA_T | 32577107 | T | ADD | 125058 | 0.8664 | -6.199 | 5.70E-10 |
| 6 | rs560530              | 32577222 | A | ADD | 147921 | 1.232  | 8.482  | 2.21E-17 |
| 6 | rs660895              | 32577380 | G | ADD | 148783 | 1.227  | 8.362  | 6.16E-17 |
| 6 | 6:32577561_AT<br>G_A  | 32577561 | A | ADD | 148474 | 1.228  | 8.412  | 4.02E-17 |
| 6 | 6:32577914_G<br>GA_G  | 32577914 | G | ADD | 148485 | 1.228  | 8.402  | 4.37E-17 |
| 6 | rs532965              | 32577973 | G | ADD | 148783 | 1.222  | 7.908  | 2.61E-15 |
| 6 | rs3997868             | 32578590 | G | ADD | 148299 | 1.23   | 8.439  | 3.21E-17 |
| 6 | rs504594              | 32578772 | A | ADD | 148467 | 1.223  | 7.915  | 2.47E-15 |
| 6 | rs6917729             | 32579643 | A | ADD | 148344 | 1.218  | 7.766  | 8.08E-15 |
| 6 | rs3997872             | 32580617 | A | ADD | 148479 | 1.223  | 7.921  | 2.36E-15 |
| 6 | rs62406297            | 32581650 | A | ADD | 148747 | 0.6257 | -7.976 | 1.51E-15 |
| 6 | rs149839148           | 32581740 | A | ADD | 147649 | 1.222  | 7.874  | 3.44E-15 |
| 6 | rs522308              | 32581922 | T | ADD | 148474 | 1.141  | 6.047  | 1.47E-09 |
| 6 | rs521539              | 32581973 | A | ADD | 148783 | 1.227  | 8.378  | 5.41E-17 |
| 6 | rs3129751             | 32582189 | C | ADD | 148475 | 1.224  | 7.937  | 2.08E-15 |
| 6 | rs28507026            | 32582485 | G | ADD | 148612 | 0.8057 | -6.954 | 3.55E-12 |
| 6 | rs62406298            | 32582541 | G | ADD | 148778 | 0.6257 | -7.977 | 1.50E-15 |
| 6 | rs62406299            | 32582558 | C | ADD | 148778 | 0.6257 | -7.977 | 1.50E-15 |
| 6 | rs3104413             | 32582650 | G | ADD | 148783 | 1.22   | 7.854  | 4.02E-15 |
| 6 | rs62406300            | 32582772 | A | ADD | 148779 | 0.6257 | -7.977 | 1.50E-15 |
| 6 | rs62406301            | 32582807 | C | ADD | 148779 | 0.6257 | -7.977 | 1.50E-15 |
| 6 | rs3129753             | 32583027 | C | ADD | 146869 | 1.226  | 7.926  | 2.26E-15 |

|   |                      |          |   |     |        |        |        |          |
|---|----------------------|----------|---|-----|--------|--------|--------|----------|
| 6 | rs6605556            | 32583099 | G | ADD | 146352 | 1.229  | 7.987  | 1.38E-15 |
| 6 | rs6941393            | 32583200 | A | ADD | 146604 | 1.231  | 8.408  | 4.19E-17 |
| 6 | rs6941395            | 32583206 | A | ADD | 146864 | 1.226  | 7.927  | 2.24E-15 |
| 6 | rs6931277            | 32583357 | T | ADD | 148692 | 1.22   | 7.847  | 4.25E-15 |
| 6 | rs6941972            | 32583529 | A | ADD | 133349 | 1.257  | 7.793  | 6.54E-15 |
| 6 | rs115625939          | 32583584 | G | ADD | 148382 | 0.6698 | -9.462 | 3.02E-21 |
| 6 | rs113676242          | 32583719 | G | ADD | 148782 | 0.6256 | -7.98  | 1.47E-15 |
| 6 | rs113468765          | 32583749 | T | ADD | 148781 | 0.6256 | -7.979 | 1.48E-15 |
| 6 | rs1281935            | 32583820 | T | ADD | 137923 | 1.295  | 7.229  | 4.88E-13 |
| 6 | rs9271349            | 32583830 | A | ADD | 142329 | 1.167  | 5.82   | 5.88E-09 |
| 6 | rs112648389          | 32583900 | G | ADD | 144874 | 0.6242 | -6.731 | 1.68E-11 |
| 6 | rs1281934            | 32584382 | G | ADD | 142509 | 1.295  | 6.893  | 5.46E-12 |
| 6 | 6:32584419_CT<br>T_C | 32584419 | C | ADD | 147060 | 1.141  | 6.028  | 1.66E-09 |
| 6 | rs73730372           | 32584581 | T | ADD | 148748 | 0.6729 | -9.43  | 4.11E-21 |
| 6 | rs62406302           | 32584662 | G | ADD | 148780 | 0.6257 | -7.978 | 1.49E-15 |
| 6 | rs510205             | 32584693 | G | ADD | 148365 | 1.226  | 8.289  | 1.14E-16 |
| 6 | rs28752520           | 32584739 | C | ADD | 147605 | 0.8368 | -6.962 | 3.35E-12 |
| 6 | rs113177970          | 32584749 | T | ADD | 148778 | 0.6256 | -7.978 | 1.48E-15 |
| 6 | rs111290278          | 32584863 | A | ADD | 148175 | 0.6225 | -7.89  | 3.03E-15 |
| 6 | rs114701564          | 32584875 | A | ADD | 147786 | 0.6347 | -7.469 | 8.08E-14 |
| 6 | rs73730377           | 32584880 | G | ADD | 148235 | 0.6693 | -9.417 | 4.64E-21 |
| 6 | rs113232664          | 32584901 | G | ADD | 146427 | 0.6178 | -7.007 | 2.44E-12 |
| 6 | rs28752526           | 32584918 | G | ADD | 145206 | 1.152  | 6.446  | 1.15E-10 |
| 6 | rs145969392          | 32584936 | G | ADD | 146877 | 1.153  | 6.553  | 5.64E-11 |
| 6 | rs685810             | 32584952 | T | ADD | 148755 | 1.149  | 6.418  | 1.38E-10 |
| 6 | rs113016235          | 32584977 | G | ADD | 148774 | 0.6748 | -9.383 | 6.44E-21 |
| 6 | rs28752534           | 32585068 | G | ADD | 131272 | 0.7678 | -10.05 | 8.77E-24 |
| 6 | rs113243185          | 32585071 | C | ADD | 148494 | 0.6708 | -9.474 | 2.68E-21 |
| 6 | rs13213821           | 32585199 | G | ADD | 138428 | 0.7709 | -9.739 | 2.05E-22 |
| 6 | 6:32585268_TC<br>_T  | 32585268 | T | ADD | 147407 | 0.6668 | -9.369 | 7.33E-21 |
| 6 | rs62406303           | 32585294 | G | ADD | 147268 | 0.7447 | -10.5  | 8.71E-26 |
| 6 | rs62406304           | 32585298 | T | ADD | 147886 | 0.6273 | -7.933 | 2.15E-15 |
| 6 | rs62406305           | 32585371 | A | ADD | 147306 | 0.6709 | -9.45  | 3.40E-21 |
| 6 | rs13217434           | 32585388 | C | ADD | 138495 | 0.7711 | -9.734 | 2.16E-22 |
| 6 | rs62406306           | 32585520 | A | ADD | 148780 | 0.6257 | -7.978 | 1.49E-15 |
| 6 | rs34692256           | 32585805 | G | ADD | 148780 | 0.6257 | -7.978 | 1.49E-15 |
| 6 | rs28383263           | 32585843 | G | ADD | 148718 | 0.625  | -7.997 | 1.28E-15 |
| 6 | rs11751024           | 32586236 | A | ADD | 148431 | 0.8162 | -9.196 | 3.73E-20 |

|   |                     |          |   |     |        |        |        |          |
|---|---------------------|----------|---|-----|--------|--------|--------|----------|
| 6 | rs11755689          | 32586376 | G | ADD | 130288 | 0.7796 | -9.825 | 8.81E-23 |
| 6 | rs62404063          | 32586419 | A | ADD | 148747 | 0.626  | -7.97  | 1.59E-15 |
| 6 | rs1281933           | 32586507 | T | ADD | 147725 | 0.6332 | -7.892 | 2.98E-15 |
| 6 | rs28383298          | 32586573 | T | ADD | 147547 | 0.6096 | -7.959 | 1.73E-15 |
| 6 | rs9271363           | 32586732 | G | ADD | 148779 | 1.18   | 6.217  | 5.08E-10 |
| 6 | rs13191810          | 32586831 | T | ADD | 148717 | 0.8671 | -6.114 | 9.74E-10 |
| 6 | rs607929            | 32586998 | G | ADD | 147497 | 0.8792 | -5.974 | 2.31E-09 |
| 6 | rs28688825          | 32587157 | G | ADD | 148766 | 0.7479 | -7.959 | 1.74E-15 |
| 6 | rs28533694          | 32587235 | T | ADD | 148708 | 0.8104 | -8.45  | 2.91E-17 |
| 6 | rs9271378           | 32587300 | G | ADD | 148696 | 0.8836 | -5.845 | 5.06E-09 |
| 6 | rs1281932           | 32587350 | A | ADD | 142526 | 1.233  | 8.176  | 2.94E-16 |
| 6 | rs111294540         | 32587359 | A | ADD | 148774 | 0.6259 | -7.972 | 1.56E-15 |
| 6 | rs190231509         | 32587425 | T | ADD | 148706 | 0.6225 | -8.026 | 1.01E-15 |
| 6 | rs544537666         | 32587494 | G | ADD | 148134 | 0.6214 | -7.868 | 3.60E-15 |
| 6 | rs36232627          | 32587499 | C | ADD | 148134 | 0.6214 | -7.868 | 3.60E-15 |
| 6 | rs36232626          | 32587500 | T | ADD | 148134 | 0.6214 | -7.868 | 3.60E-15 |
| 6 | rs36232625          | 32587507 | T | ADD | 148145 | 0.6214 | -7.868 | 3.62E-15 |
| 6 | rs34116693          | 32587603 | T | ADD | 148775 | 0.6259 | -7.972 | 1.56E-15 |
| 6 | rs36232342          | 32587618 | C | ADD | 148773 | 0.6261 | -7.967 | 1.63E-15 |
| 6 | rs9271409           | 32587628 | C | ADD | 147766 | 1.135  | 5.797  | 6.76E-09 |
| 6 | rs35168703          | 32587652 | T | ADD | 148228 | 0.6189 | -7.95  | 1.87E-15 |
| 6 | rs35390996          | 32587663 | A | ADD | 148770 | 0.6262 | -7.962 | 1.69E-15 |
| 6 | rs116300229         | 32587808 | A | ADD | 144323 | 0.6041 | -6.724 | 1.77E-11 |
| 6 | rs1281931           | 32587966 | C | ADD | 137869 | 1.292  | 7.183  | 6.80E-13 |
| 6 | rs80257164          | 32587967 | A | ADD | 148775 | 0.6261 | -7.967 | 1.63E-15 |
| 6 | rs9271429           | 32587985 | A | ADD | 148671 | 1.171  | 5.976  | 2.29E-09 |
| 6 | rs200991817         | 32588104 | T | ADD | 144196 | 0.6188 | -6.624 | 3.50E-11 |
| 6 | 6:32588135_GT<br>_G | 32588135 | G | ADD | 146401 | 0.6195 | -7.38  | 1.58E-13 |
| 6 | rs115076650         | 32588215 | G | ADD | 148780 | 0.6258 | -7.973 | 1.55E-15 |
| 6 | rs115632345         | 32588480 | T | ADD | 148683 | 0.6261 | -7.965 | 1.65E-15 |
| 6 | rs9271464           | 32588544 | T | ADD | 140389 | 1.142  | 5.862  | 4.56E-09 |
| 6 | rs9271465           | 32588554 | T | ADD | 140418 | 1.142  | 5.856  | 4.73E-09 |
| 6 | rs9271469           | 32588630 | C | ADD | 146219 | 1.135  | 5.749  | 8.99E-09 |
| 6 | rs76815088          | 32588713 | C | ADD | 148781 | 0.6259 | -7.972 | 1.56E-15 |
| 6 | rs144591706         | 32588819 | T | ADD | 148725 | 0.6282 | -7.909 | 2.59E-15 |
| 6 | rs561763188         | 32588828 | C | ADD | 147627 | 0.6287 | -7.607 | 2.80E-14 |
| 6 | rs9271480           | 32588831 | A | ADD | 148735 | 1.133  | 5.737  | 9.62E-09 |
| 6 | rs114014117         | 32588842 | G | ADD | 142280 | 0.6017 | -5.947 | 2.74E-09 |

|   |               |          |   |     |        |        |        |          |
|---|---------------|----------|---|-----|--------|--------|--------|----------|
| 6 | rs9271485     | 32588953 | G | ADD | 148475 | 1.133  | 5.743  | 9.30E-09 |
|   |               |          | A |     |        |        |        |          |
|   |               |          | A |     |        |        |        |          |
| 6 | rs145443211   | 32588970 | C | ADD | 146567 | 1.135  | 5.769  | 7.98E-09 |
| 6 | rs9271486     | 32588980 | T | ADD | 146569 | 1.135  | 5.768  | 8.00E-09 |
| 6 | rs9271489     | 32589051 | A | ADD | 148783 | 0.8288 | -7.969 | 1.60E-15 |
| 6 | rs9271492     | 32589122 | C | ADD | 148756 | 0.8432 | -7.45  | 9.35E-14 |
| 6 | rs34645399    | 32589169 | G | ADD | 148783 | 0.625  | -8.007 | 1.18E-15 |
|   | 6:32589233_GC |          |   |     |        |        |        |          |
| 6 | _G            | 32589233 | G | ADD | 148779 | 0.6257 | -7.978 | 1.49E-15 |
| 6 | rs9271494     | 32589240 | C | ADD | 142930 | 1.222  | 7.462  | 8.55E-14 |
| 6 | rs144081603   | 32589374 | C | ADD | 143438 | 0.628  | -6.14  | 8.24E-10 |
| 6 | rs9271508     | 32589410 | T | ADD | 148753 | 0.8279 | -8.01  | 1.15E-15 |
| 6 | rs9271509     | 32589415 | A | ADD | 145768 | 1.2    | 7.12   | 1.08E-12 |
| 6 | rs112401673   | 32589416 | T | ADD | 148211 | 0.6208 | -7.898 | 2.83E-15 |
| 6 | rs114785125   | 32589520 | G | ADD | 148237 | 0.6192 | -7.942 | 2.00E-15 |
| 6 | rs9271513     | 32589523 | C | ADD | 148771 | 1.172  | 6.014  | 1.81E-09 |
| 6 | rs112447098   | 32589544 | A | ADD | 148772 | 0.626  | -7.969 | 1.60E-15 |
| 6 | rs9271516     | 32589668 | A | ADD | 148301 | 1.138  | 5.944  | 2.79E-09 |
|   | 6:32589721_TA |          |   |     |        |        |        |          |
| 6 | ATTCTC_T      | 32589721 | T | ADD | 141928 | 1.151  | 6.307  | 2.84E-10 |
| 6 | rs9271517     | 32589740 | G | ADD | 141929 | 1.151  | 6.307  | 2.85E-10 |
| 6 | rs9271519     | 32589751 | C | ADD | 142440 | 1.145  | 6.063  | 1.34E-09 |
| 6 | rs9271521     | 32589783 | T | ADD | 142624 | 1.146  | 6.08   | 1.21E-09 |
| 6 | rs9271522     | 32589791 | C | ADD | 148759 | 0.8287 | -7.975 | 1.52E-15 |
| 6 | rs34135912    | 32589793 | A | ADD | 148766 | 0.6258 | -7.973 | 1.55E-15 |
| 6 | rs9271523     | 32589806 | G | ADD | 142803 | 1.145  | 6.082  | 1.19E-09 |
| 6 | rs9271527     | 32589867 | T | ADD | 148624 | 0.8279 | -8.011 | 1.14E-15 |
| 6 | rs9271529     | 32589937 | G | ADD | 147103 | 1.171  | 5.951  | 2.67E-09 |
| 6 | rs9271532     | 32589945 | C | ADD | 143572 | 1.137  | 5.764  | 8.23E-09 |
| 6 | rs9271533     | 32589952 | T | ADD | 145144 | 0.8301 | -7.845 | 4.32E-15 |
| 6 | rs9271536     | 32589978 | A | ADD | 148744 | 1.172  | 6.008  | 1.88E-09 |
| 6 | rs9271537     | 32589982 | T | ADD | 147154 | 0.8641 | -6.7   | 2.09E-11 |
| 6 | rs9271539     | 32590028 | A | ADD | 148765 | 0.8286 | -7.979 | 1.48E-15 |
|   | 6:32590033_A  |          |   |     |        |        |        |          |
| 6 | AT_A          | 32590033 | A | ADD | 147944 | 0.6295 | -7.886 | 3.13E-15 |
|   | 6:32590087_GT |          |   |     |        |        |        |          |
| 6 | _G            | 32590087 | G | ADD | 148733 | 1.134  | 5.794  | 6.86E-09 |
| 6 | rs35025478    | 32590162 | G | ADD | 148765 | 0.6258 | -7.973 | 1.55E-15 |
| 6 | rs35786457    | 32590165 | A | ADD | 148771 | 0.6257 | -7.978 | 1.49E-15 |
| 6 | rs35947801    | 32590187 | A | ADD | 148765 | 0.6258 | -7.973 | 1.55E-15 |
| 6 | rs9271558     | 32590348 | G | ADD | 147514 | 0.8311 | -7.822 | 5.19E-15 |

|   |                 |          |   |     |        |        |        |          |
|---|-----------------|----------|---|-----|--------|--------|--------|----------|
| 6 | rs113705304     | 32590453 | G | ADD | 148672 | 0.6616 | -9.469 | 2.82E-21 |
| 6 | rs9271568       | 32590463 | A | ADD | 134712 | 1.146  | 5.767  | 8.06E-09 |
| 6 | rs2105899       | 32590473 | T | ADD | 148351 | 1.17   | 5.923  | 3.16E-09 |
| 6 | rs9271571       | 32590483 | T | ADD | 146555 | 1.142  | 6.041  | 1.54E-09 |
| 6 | rs2105898       | 32590498 | T | ADD | 148375 | 1.17   | 5.92   | 3.22E-09 |
| 6 | 6:32590600_AT_A | 32590600 | A | ADD | 148754 | 1.133  | 5.763  | 8.27E-09 |
| 6 | rs570194309     | 32590602 | C | ADD | 148754 | 1.133  | 5.763  | 8.27E-09 |
| 6 | rs9271576       | 32590612 | C | ADD | 147303 | 1.135  | 5.775  | 7.71E-09 |
| 6 | rs34043628      | 32590619 | C | ADD | 147581 | 0.6289 | -7.902 | 2.74E-15 |
| 6 | rs2395225       | 32590624 | C | ADD | 146061 | 0.8306 | -7.824 | 5.11E-15 |
| 6 | rs9271579       | 32590637 | A | ADD | 147250 | 1.212  | 7.622  | 2.49E-14 |
| 6 | rs35700251      | 32590639 | T | ADD | 148709 | 0.624  | -8.01  | 1.15E-15 |
| 6 | rs9271580       | 32590641 | G | ADD | 148489 | 1.213  | 7.753  | 8.99E-15 |
| 6 | rs35062987      | 32590735 | T | ADD | 148757 | 0.8499 | -5.822 | 5.82E-09 |
| 6 | rs34831921      | 32590768 | A | ADD | 148715 | 0.6606 | -9.515 | 1.81E-21 |
| 6 | rs35236701      | 32590778 | T | ADD | 148697 | 0.6243 | -8.002 | 1.23E-15 |
| 6 | rs2097431       | 32590833 | A | ADD | 146056 | 1.172  | 5.995  | 2.04E-09 |
| 6 | rs2097431       | 32590833 | T | ADD | 80871  | 0.828  | -6.382 | 1.75E-10 |
| 6 | rs9271584       | 32590870 | C | ADD | 148756 | 1.133  | 5.733  | 9.89E-09 |
| 6 | rs9271585       | 32590879 | A | ADD | 148756 | 1.133  | 5.733  | 9.89E-09 |
| 6 | 6:32591008_TA_T | 32591008 | T | ADD | 148702 | 0.6243 | -8.004 | 1.21E-15 |
| 6 | rs9271589       | 32591128 | A | ADD | 148742 | 1.133  | 5.733  | 9.84E-09 |
| 6 | rs9271594       | 32591213 | G | ADD | 148692 | 1.223  | 7.926  | 2.27E-15 |
| 6 | rs35407265      | 32591226 | G | ADD | 148602 | 0.661  | -9.489 | 2.34E-21 |
| 6 | rs35316732      | 32591232 | T | ADD | 148602 | 0.661  | -9.489 | 2.34E-21 |
| 6 | rs34376179      | 32591238 | G | ADD | 144674 | 0.6707 | -8.346 | 7.05E-17 |
| 6 | rs3129764       | 32591300 | G | ADD | 147729 | 1.173  | 6.034  | 1.60E-09 |
| 6 | rs9271602       | 32591383 | G | ADD | 146589 | 1.135  | 5.938  | 2.89E-09 |
| 6 | rs34915133      | 32591422 | G | ADD | 148377 | 0.6603 | -9.515 | 1.81E-21 |
| 6 | rs3129765       | 32591428 | A | ADD | 148297 | 1.171  | 5.967  | 2.42E-09 |
| 6 | rs9271604       | 32591430 | G | ADD | 148697 | 1.134  | 5.776  | 7.64E-09 |
| 6 | rs9271605       | 32591448 | A | ADD | 148745 | 1.133  | 5.735  | 9.75E-09 |
| 6 | rs112953812     | 32591500 | A | ADD | 148722 | 0.6247 | -7.99  | 1.35E-15 |
| 6 | rs9271607       | 32591566 | G | ADD | 148740 | 1.133  | 5.738  | 9.57E-09 |
| 6 | rs73728618      | 32591567 | A | ADD | 148701 | 0.6607 | -9.511 | 1.90E-21 |
| 6 | rs9271608       | 32591588 | G | ADD | 148681 | 1.221  | 7.883  | 3.19E-15 |
| 6 | rs9271609       | 32591597 | C | ADD | 148749 | 1.133  | 5.762  | 8.34E-09 |
| 6 | rs35001273      | 32591664 | A | ADD | 148115 | 0.6622 | -9.376 | 6.86E-21 |



|   |                        |          |   |     |        |        |        |          |
|---|------------------------|----------|---|-----|--------|--------|--------|----------|
| 6 | rs9271615              | 32591686 | G | ADD | 148074 | 0.8054 | -10.08 | 6.60E-24 |
| 6 | rs201769738            | 32591687 | A | ADD | 148096 | 0.6623 | -9.375 | 6.91E-21 |
| 6 | 6:32591689_GC<br>A_G   | 32591689 | G | ADD | 148073 | 0.8055 | -10.08 | 6.89E-24 |
| 6 | rs556499677            | 32591695 | G | ADD | 148439 | 0.628  | -7.796 | 6.40E-15 |
| 6 | rs114076271            | 32591717 | A | ADD | 148725 | 0.6247 | -7.992 | 1.33E-15 |
| 6 | rs9271618              | 32591752 | A | ADD | 147988 | 0.8278 | -7.984 | 1.42E-15 |
| 6 | rs34412149             | 32591892 | G | ADD | 148707 | 0.6232 | -8.019 | 1.06E-15 |
| 6 | rs9271623              | 32591914 | C | ADD | 141301 | 0.8271 | -7.903 | 2.72E-15 |
| 6 | rs9271629              | 32591976 | C | ADD | 148363 | 1.171  | 5.962  | 2.49E-09 |
| 6 | rs9271630              | 32591989 | G | ADD | 140996 | 0.8262 | -7.945 | 1.94E-15 |
| 6 | rs9271631              | 32591996 | A | ADD | 148364 | 1.171  | 5.979  | 2.24E-09 |
| 6 | rs1281947              | 32592009 | G | ADD | 147958 | 1.216  | 7.645  | 2.08E-14 |
| 6 | 6:32592027_A<br>ATCT_A | 32592027 | A | ADD | 148678 | 1.134  | 5.771  | 7.90E-09 |
| 6 | rs35867827             | 32592068 | C | ADD | 148424 | 0.6608 | -9.505 | 1.99E-21 |
| 6 | rs9271637              | 32592124 | G | ADD | 140489 | 1.144  | 5.973  | 2.33E-09 |
| 6 | rs532216409            | 32592152 | G | ADD | 148204 | 0.663  | -9.319 | 1.17E-20 |
| 6 | rs9271640              | 32592200 | T | ADD | 148526 | 1.17   | 5.955  | 2.60E-09 |
| 6 | rs9271641              | 32592209 | A | ADD | 148469 | 1.171  | 5.982  | 2.21E-09 |
| 6 | rs35224566             | 32592313 | C | ADD | 148413 | 0.6602 | -9.517 | 1.79E-21 |
| 6 | rs9271644              | 32592337 | A | ADD | 148063 | 1.134  | 5.781  | 7.42E-09 |
| 6 | rs9271645              | 32592345 | C | ADD | 148486 | 1.172  | 6.027  | 1.67E-09 |
| 6 | rs9271646              | 32592351 | G | ADD | 147925 | 0.8284 | -7.955 | 1.79E-15 |
| 6 | rs9271647              | 32592354 | G | ADD | 147931 | 0.8286 | -7.946 | 1.92E-15 |
| 6 | rs9271648              | 32592358 | T | ADD | 147904 | 0.8054 | -10.08 | 6.49E-24 |
| 6 | rs9271649              | 32592359 | G | ADD | 147931 | 0.8286 | -7.946 | 1.92E-15 |
| 6 | rs9271650              | 32592383 | T | ADD | 148750 | 1.171  | 5.998  | 2.00E-09 |
| 6 | rs9271653              | 32592556 | C | ADD | 148278 | 0.8046 | -10.14 | 3.82E-24 |
| 6 | rs9271654              | 32592565 | A | ADD | 148032 | 0.8296 | -7.882 | 3.23E-15 |
| 6 | rs9271655              | 32592567 | G | ADD | 148660 | 1.171  | 6.006  | 1.91E-09 |
| 6 | rs9271658              | 32592588 | T | ADD | 148660 | 1.171  | 6.006  | 1.91E-09 |
| 6 | rs9271660              | 32592602 | G | ADD | 148090 | 1.133  | 5.736  | 9.72E-09 |
| 6 | rs9271661              | 32592605 | A | ADD | 142467 | 1.142  | 5.97   | 2.37E-09 |
| 6 | rs9271662              | 32592628 | A | ADD | 142532 | 0.817  | -8.234 | 1.82E-16 |
| 6 | rs9271663              | 32592636 | A | ADD | 147986 | 0.8046 | -10.12 | 4.29E-24 |
| 6 | rs9271664              | 32592656 | T | ADD | 148689 | 1.171  | 6.002  | 1.95E-09 |
| 6 | rs9271667              | 32592710 | C | ADD | 147877 | 0.8275 | -7.992 | 1.32E-15 |
| 6 | rs9271673              | 32592833 | C | ADD | 148704 | 1.17   | 5.947  | 2.74E-09 |
| 6 | rs9271674              | 32592845 | C | ADD | 147212 | 1.134  | 5.781  | 7.41E-09 |

|   |            |          |   |     |        |        |        |          |
|---|------------|----------|---|-----|--------|--------|--------|----------|
| 6 | rs9271675  | 32592862 | C | ADD | 146130 | 1.139  | 5.937  | 2.90E-09 |
| 6 | rs9271678  | 32592908 | C | ADD | 143162 | 1.171  | 5.927  | 3.09E-09 |
| 6 | rs9271679  | 32592909 | A | ADD | 143162 | 1.171  | 5.927  | 3.09E-09 |
| 6 | rs9271680  | 32592915 | G | ADD | 143187 | 1.171  | 5.933  | 2.98E-09 |
| 6 | rs9271681  | 32592918 | T | ADD | 147473 | 0.8332 | -7.785 | 6.99E-15 |
| 6 | rs9271682  | 32592923 | G | ADD | 144924 | 1.137  | 5.819  | 5.92E-09 |
| 6 | rs9271683  | 32592950 | C | ADD | 148783 | 1.172  | 6.05   | 1.45E-09 |
| 6 | rs9271684  | 32592953 | T | ADD | 112531 | 0.823  | -7.328 | 2.33E-13 |
| 6 | rs9271685  | 32592970 | C | ADD | 146034 | 1.139  | 5.926  | 3.10E-09 |
| 6 | rs9271686  | 32592973 | T | ADD | 147796 | 1.17   | 5.982  | 2.20E-09 |
| 6 | rs9271688  | 32592992 | G | ADD | 148542 | 0.8291 | -7.931 | 2.17E-15 |
| 6 | rs9271689  | 32592999 | C | ADD | 147798 | 1.17   | 5.982  | 2.21E-09 |
| 6 | rs9271691  | 32593006 | G | ADD | 147521 | 0.8053 | -10.06 | 8.08E-24 |
| 6 | rs9271692  | 32593010 | A | ADD | 132774 | 0.8225 | -8.585 | 9.10E-18 |
| 6 | rs9271693  | 32593033 | T | ADD | 148475 | 1.134  | 5.765  | 8.19E-09 |
| 6 | rs78390183 | 32593040 | T | ADD | 148445 | 0.6161 | -8.095 | 5.71E-16 |
| 6 | rs9271694  | 32593051 | C | ADD | 148731 | 0.8289 | -7.944 | 1.96E-15 |
| 6 | rs9271695  | 32593080 | A | ADD | 148687 | 1.171  | 5.994  | 2.05E-09 |
| 6 | rs9271697  | 32593095 | G | ADD | 148753 | 1.17   | 5.956  | 2.59E-09 |
| 6 | rs35508382 | 32593144 | G | ADD | 148629 | 0.6597 | -9.537 | 1.47E-21 |
| 6 | rs9271699  | 32593179 | G | ADD | 148233 | 0.8056 | -10.07 | 7.40E-24 |
| 6 | rs9271700  | 32593198 | G | ADD | 147738 | 1.171  | 6.014  | 1.81E-09 |
| 6 | rs9271701  | 32593199 | T | ADD | 148599 | 1.171  | 5.994  | 2.05E-09 |
| 6 | rs9271702  | 32593220 | T | ADD | 147761 | 1.171  | 6      | 1.98E-09 |
| 6 | rs34720986 | 32593270 | C | ADD | 148407 | 0.6585 | -9.516 | 1.80E-21 |
| 6 | rs9271703  | 32593280 | T | ADD | 148647 | 0.829  | -7.939 | 2.04E-15 |
| 6 | rs9271704  | 32593317 | G | ADD | 144544 | 0.845  | -7.002 | 2.53E-12 |
| 6 | rs9271705  | 32593321 | T | ADD | 145530 | 0.8426 | -7.148 | 8.83E-13 |
| 6 | rs9271707  | 32593356 | T | ADD | 148316 | 0.804  | -10.19 | 2.20E-24 |
| 6 | rs9271708  | 32593386 | A | ADD | 119497 | 0.8076 | -7.143 | 9.14E-13 |
| 6 | rs9271709  | 32593392 | A | ADD | 148783 | 0.8285 | -7.966 | 1.64E-15 |
| 6 | rs9271711  | 32593430 | T | ADD | 141901 | 0.8008 | -10.03 | 1.18E-23 |
| 6 | rs9271712  | 32593432 | A | ADD | 141108 | 0.8106 | -9.568 | 1.09E-21 |
| 6 | rs9271714  | 32593434 | G | ADD | 141901 | 0.8008 | -10.03 | 1.18E-23 |
| 6 | rs9271715  | 32593441 | T | ADD | 141915 | 0.8008 | -10.03 | 1.15E-23 |
| 6 | rs9271716  | 32593442 | G | ADD | 141915 | 0.8008 | -10.03 | 1.15E-23 |
| 6 | rs9271717  | 32593453 | G | ADD | 141948 | 0.801  | -10.02 | 1.23E-23 |
| 6 | rs9271718  | 32593465 | T | ADD | 142415 | 1.135  | 5.76   | 8.41E-09 |

|   |                     |          |   |     |        |        |        |          |
|---|---------------------|----------|---|-----|--------|--------|--------|----------|
| 6 | rs9271719           | 32593479 | C | ADD | 148671 | 1.17   | 5.959  | 2.53E-09 |
| 6 | rs9271720           | 32593507 | A | ADD | 148783 | 0.8051 | -10.13 | 4.22E-24 |
| 6 | rs9271721           | 32593519 | G | ADD | 148675 | 1.17   | 5.964  | 2.47E-09 |
| 6 | rs9271722           | 32593522 | G | ADD | 148635 | 1.135  | 5.843  | 5.13E-09 |
| 6 | rs9271724           | 32593552 | C | ADD | 148215 | 0.8305 | -7.844 | 4.36E-15 |
| 6 | rs9271726           | 32593566 | G | ADD | 148604 | 1.21   | 7.689  | 1.48E-14 |
| 6 | rs9271728           | 32593592 | C | ADD | 147250 | 0.8336 | -7.647 | 2.06E-14 |
| 6 | rs9271729           | 32593600 | A | ADD | 147241 | 0.8337 | -7.643 | 2.13E-14 |
| 6 | rs562122363         | 32593617 | C | ADD | 144320 | 0.6306 | -6.445 | 1.16E-10 |
| 6 | rs9271733           | 32593633 | A | ADD | 144383 | 0.8469 | -6.893 | 5.46E-12 |
| 6 | rs9271738           | 32593691 | G | ADD | 144480 | 0.8453 | -6.98  | 2.96E-12 |
| 6 | rs9271739           | 32593692 | T | ADD | 138756 | 0.8152 | -9.153 | 5.55E-20 |
| 6 | rs28362368          | 32594040 | G | ADD | 148335 | 0.8294 | -7.91  | 2.58E-15 |
| 6 | rs72848204          | 32594073 | T | ADD | 148209 | 0.8286 | -7.951 | 1.86E-15 |
| 6 | rs34518860          | 32594103 | A | ADD | 148387 | 0.657  | -9.552 | 1.27E-21 |
| 6 | 6:32594132_A<br>G_A | 32594132 | A | ADD | 147308 | 0.6197 | -7.734 | 1.04E-14 |
| 6 | rs9271764           | 32594159 | A | ADD | 148526 | 1.133  | 5.736  | 9.72E-09 |
| 6 | rs9271765           | 32594166 | G | ADD | 148526 | 1.133  | 5.736  | 9.72E-09 |
| 6 | rs9271766           | 32594169 | A | ADD | 148730 | 1.17   | 5.952  | 2.66E-09 |
| 6 | rs9271767           | 32594176 | T | ADD | 148526 | 1.133  | 5.736  | 9.72E-09 |
| 6 | rs35130701          | 32594199 | G | ADD | 148635 | 0.8295 | -7.915 | 2.48E-15 |
| 6 | rs9271769           | 32594217 | T | ADD | 147014 | 1.135  | 5.784  | 7.31E-09 |
| 6 | rs9271771           | 32594274 | T | ADD | 148783 | 1.171  | 5.986  | 2.15E-09 |
| 6 | rs9271772           | 32594275 | G | ADD | 148778 | 1.17   | 5.976  | 2.29E-09 |
| 6 | rs75237145          | 32594295 | T | ADD | 144748 | 0.802  | -10.15 | 3.46E-24 |
| 6 | rs114969562         | 32594299 | A | ADD | 133075 | 0.8606 | -5.738 | 9.61E-09 |
| 6 | rs9271774           | 32594309 | A | ADD | 148746 | 1.171  | 5.989  | 2.11E-09 |
| 6 | rs568805507         | 32594388 | T | ADD | 142030 | 0.6807 | -7.286 | 3.21E-13 |
| 6 | rs535840294         | 32594394 | G | ADD | 142006 | 0.6818 | -7.255 | 4.01E-13 |
| 6 | rs116093550         | 32594395 | G | ADD | 145322 | 0.817  | -9.341 | 9.56E-21 |
| 6 | rs116361489         | 32594396 | T | ADD | 145322 | 0.817  | -9.341 | 9.56E-21 |
| 6 | rs111634228         | 32594452 | G | ADD | 146359 | 0.8096 | -9.778 | 1.39E-22 |
| 6 | rs114309058         | 32594470 | A | ADD | 83482  | 0.7789 | -6.23  | 4.66E-10 |
| 6 | rs9271780           | 32594535 | C | ADD | 137727 | 0.8145 | -9.181 | 4.29E-20 |
| 6 | rs9271781           | 32594547 | A | ADD | 136676 | 0.8152 | -9.106 | 8.55E-20 |
| 6 | rs9271782           | 32594562 | A | ADD | 131111 | 0.8097 | -9.166 | 4.91E-20 |
| 6 | rs9271783           | 32594579 | A | ADD | 117366 | 0.8331 | -7.371 | 1.69E-13 |
| 6 | 6:32594650_CA<br>_C | 32594650 | C | ADD | 127419 | 0.813  | -8.787 | 1.54E-18 |

|   |                     |          |   |     |        |        |        |          |
|---|---------------------|----------|---|-----|--------|--------|--------|----------|
| 6 | rs9271784           | 32594704 | A | ADD | 111549 | 0.8448 | -6.608 | 3.89E-11 |
| 6 | rs9271786           | 32594709 | T | ADD | 130441 | 0.8127 | -8.949 | 3.59E-19 |
| 6 | rs9271787           | 32594718 | C | ADD | 137814 | 0.8092 | -9.456 | 3.21E-21 |
| 6 | rs9271788           | 32594734 | G | ADD | 145346 | 0.7992 | -10.31 | 6.05E-25 |
| 6 | rs9271789           | 32594768 | A | ADD | 145006 | 0.8005 | -10.23 | 1.51E-24 |
| 6 | rs9271791           | 32594810 | A | ADD | 144997 | 0.8006 | -10.22 | 1.59E-24 |
|   |                     |          | G |     |        |        |        |          |
|   |                     |          | G |     |        |        |        |          |
|   |                     |          | A |     |        |        |        |          |
| 6 | rs147599819         | 32594816 | T | ADD | 110595 | 0.8454 | -6.6   | 4.12E-11 |
|   |                     |          | A |     |        |        |        |          |
| 6 | rs9281963           | 32594818 | T | ADD | 137810 | 1.221  | 7.784  | 7.02E-15 |
|   |                     |          | G |     |        |        |        |          |
|   |                     |          | A |     |        |        |        |          |
| 6 | rs200191577         | 32594819 | T | ADD | 137810 | 1.221  | 7.784  | 7.02E-15 |
| 6 | rs9271794           | 32594855 | A | ADD | 147602 | 0.8049 | -10.09 | 6.39E-24 |
| 6 | rs72848212          | 32594898 | T | ADD | 148381 | 0.8037 | -10.18 | 2.40E-24 |
| 6 | rs9271823           | 32594915 | G | ADD | 148462 | 0.8037 | -10.18 | 2.36E-24 |
| 6 | rs9271824           | 32594916 | G | ADD | 148783 | 0.805  | -10.12 | 4.57E-24 |
| 6 | rs9271842           | 32594953 | A | ADD | 106282 | 0.8205 | -7.426 | 1.12E-13 |
| 6 | rs9271843           | 32594957 | T | ADD | 143357 | 0.8015 | -10.06 | 8.04E-24 |
| 6 | rs3129767           | 32594975 | G | ADD | 147143 | 1.173  | 5.808  | 6.31E-09 |
| 6 | rs9271846           | 32594980 | A | ADD | 138573 | 0.8064 | -9.614 | 6.96E-22 |
| 6 | 6:32594986_TA<br>_T | 32594986 | T | ADD | 138570 | 0.8064 | -9.616 | 6.86E-22 |
| 6 | rs9271847           | 32594993 | G | ADD | 138635 | 0.8062 | -9.63  | 5.98E-22 |
| 6 | rs116518618         | 32594998 | T | ADD | 137070 | 0.6715 | -6.026 | 1.68E-09 |
| 6 | rs9271848           | 32595027 | G | ADD | 146286 | 0.8045 | -10.06 | 8.41E-24 |
| 6 | rs3104390           | 32595031 | A | ADD | 148756 | 1.17   | 5.964  | 2.47E-09 |
| 6 | rs9271850           | 32595060 | G | ADD | 146139 | 0.8244 | -8.052 | 8.18E-16 |
| 6 | rs3129768           | 32595083 | G | ADD | 148783 | 1.165  | 5.803  | 6.50E-09 |
| 6 | rs9271854           | 32595118 | A | ADD | 148515 | 0.8049 | -10.12 | 4.55E-24 |
| 6 | rs9271855           | 32595119 | C | ADD | 148515 | 0.8049 | -10.12 | 4.55E-24 |
| 6 | rs9271856           | 32595120 | A | ADD | 148515 | 0.8049 | -10.12 | 4.55E-24 |
| 6 | rs9271857           | 32595147 | T | ADD | 137390 | 0.8203 | -8.898 | 5.67E-19 |
| 6 | rs116603449         | 32595194 | T | ADD | 83719  | 0.7686 | -7.074 | 1.50E-12 |
| 6 | rs9271858           | 32595223 | G | ADD | 148552 | 0.8045 | -10.15 | 3.46E-24 |
| 6 | rs9271859           | 32595231 | G | ADD | 148171 | 0.8065 | -10.02 | 1.24E-23 |
| 6 | rs9271861           | 32595287 | T | ADD | 139059 | 0.8019 | -9.903 | 4.06E-23 |
| 6 | rs9271862           | 32595333 | C | ADD | 125918 | 0.8242 | -8.223 | 1.99E-16 |
| 6 | rs9271863           | 32595334 | A | ADD | 129104 | 0.8115 | -8.984 | 2.62E-19 |
| 6 | rs6921651           | 32595345 | A | ADD | 131046 | 0.8256 | -8.441 | 3.15E-17 |
| 6 | rs9271865           | 32595360 | T | ADD | 130703 | 0.8132 | -8.942 | 3.84E-19 |

|   |                      |          |   |     |        |        |        |          |
|---|----------------------|----------|---|-----|--------|--------|--------|----------|
| 6 | rs9271866            | 32595367 | T | ADD | 130698 | 0.8132 | -8.939 | 3.91E-19 |
| 6 | rs9271867            | 32595368 | G | ADD | 130698 | 0.8132 | -8.939 | 3.91E-19 |
| 6 | rs9271868            | 32595375 | C | ADD | 130227 | 0.8078 | -9.039 | 1.58E-19 |
| 6 | rs9271869            | 32595376 | A | ADD | 130225 | 0.8078 | -9.039 | 1.59E-19 |
| 6 | rs9271870            | 32595377 | T | ADD | 130225 | 0.8078 | -9.039 | 1.59E-19 |
| 6 | rs9271871            | 32595383 | C | ADD | 144631 | 0.8342 | -7.491 | 6.85E-14 |
| 6 | rs9271872            | 32595418 | G | ADD | 147815 | 0.8318 | -7.773 | 7.69E-15 |
| 6 | rs9271873            | 32595421 | A | ADD | 147816 | 0.8318 | -7.773 | 7.68E-15 |
| 6 | rs6926251            | 32595429 | T | ADD | 147510 | 1.17   | 5.979  | 2.25E-09 |
| 6 | rs9271876            | 32595448 | G | ADD | 141615 | 0.8088 | -9.656 | 4.65E-22 |
| 6 | rs9271877            | 32595469 | C | ADD | 141965 | 0.8088 | -9.673 | 3.92E-22 |
| 6 | rs9271878            | 32595474 | C | ADD | 141993 | 0.8086 | -9.681 | 3.63E-22 |
| 6 | rs9271879            | 32595489 | T | ADD | 142179 | 0.8085 | -9.695 | 3.17E-22 |
| 6 | rs9271880            | 32595596 | C | ADD | 147096 | 0.8348 | -7.57  | 3.74E-14 |
| 6 | rs9271881            | 32595604 | A | ADD | 138013 | 0.8106 | -9.39  | 6.01E-21 |
| 6 | rs9271882            | 32595605 | T | ADD | 138006 | 0.8105 | -9.399 | 5.51E-21 |
| 6 | rs9271883            | 32595610 | A | ADD | 138040 | 0.8111 | -9.365 | 7.57E-21 |
| 6 | rs9271884            | 32595628 | C | ADD | 137693 | 0.8133 | -9.246 | 2.32E-20 |
| 6 | rs9271885            | 32595629 | T | ADD | 137693 | 0.8133 | -9.246 | 2.32E-20 |
| 6 | rs9271886            | 32595633 | T | ADD | 137693 | 0.8133 | -9.246 | 2.32E-20 |
| 6 | rs9271887            | 32595679 | A | ADD | 148638 | 0.8291 | -7.935 | 2.10E-15 |
| 6 | rs9271888            | 32595732 | C | ADD | 148558 | 0.8058 | -10.07 | 7.38E-24 |
| 6 | rs9271889            | 32595747 | A | ADD | 148714 | 0.8055 | -10.1  | 5.67E-24 |
| 6 | rs9271890            | 32595779 | A | ADD | 148611 | 0.8057 | -10.08 | 6.78E-24 |
| 6 | rs9271891            | 32595783 | T | ADD | 148700 | 0.8055 | -10.1  | 5.60E-24 |
| 6 | rs9271892            | 32595813 | C | ADD | 148679 | 0.8058 | -10.08 | 6.93E-24 |
| 6 | rs35879651           | 32595857 | T | ADD | 148464 | 0.6225 | -7.973 | 1.55E-15 |
| 6 | rs9271893            | 32595859 | T | ADD | 148650 | 0.8046 | -10.15 | 3.41E-24 |
| 6 | rs9271894            | 32595874 | T | ADD | 148783 | 0.8295 | -7.913 | 2.51E-15 |
| 6 | rs9271896            | 32595907 | A | ADD | 148634 | 0.8046 | -10.14 | 3.58E-24 |
| 6 | rs9271897            | 32595954 | A | ADD | 148598 | 0.8048 | -10.13 | 4.06E-24 |
| 6 | rs9271898            | 32595972 | A | ADD | 148646 | 0.8053 | -10.1  | 5.42E-24 |
| 6 | rs9271899            | 32596007 | G | ADD | 148395 | 0.8066 | -10.02 | 1.20E-23 |
| 6 | rs9271900            | 32596013 | G | ADD | 148528 | 0.8303 | -7.872 | 3.50E-15 |
| 6 | rs9271901            | 32596027 | T | ADD | 148398 | 0.8066 | -10.02 | 1.19E-23 |
| 6 | rs9271906            | 32596048 | A | ADD | 148399 | 0.8065 | -10.02 | 1.19E-23 |
| 6 | 6:32596074_CA<br>G_C | 32596074 | C | ADD | 148215 | 0.8051 | -10.12 | 4.40E-24 |
| 6 | rs9271907            | 32596123 | T | ADD | 147017 | 0.8108 | -9.734 | 2.16E-22 |

|   |                      |          |                                      |     |        |        |        |          |
|---|----------------------|----------|--------------------------------------|-----|--------|--------|--------|----------|
| 6 | rs9271908            | 32596131 | T<br>A<br>C<br>T<br>T<br>A<br>C<br>A | ADD | 147017 | 0.8108 | -9.734 | 2.16E-22 |
| 6 | rs148565413          | 32596159 | G                                    | ADD | 144804 | 0.8156 | -9.395 | 5.73E-21 |
| 6 | rs9271909            | 32596177 | T                                    | ADD | 144804 | 0.8156 | -9.395 | 5.73E-21 |
| 6 | rs9271910            | 32596183 | C                                    | ADD | 144819 | 0.8154 | -9.406 | 5.16E-21 |
| 6 | rs2133036            | 32596203 | T                                    | ADD | 146935 | 1.206  | 7.345  | 2.06E-13 |
| 6 | rs9271912            | 32596207 | T                                    | ADD | 145881 | 0.8128 | -9.583 | 9.43E-22 |
| 6 | rs9271913            | 32596222 | A                                    | ADD | 145880 | 0.8128 | -9.583 | 9.43E-22 |
| 6 | 6:32596232_G<br>A_G  | 32596232 | G                                    | ADD | 148747 | 0.8054 | -10.1  | 5.43E-24 |
| 6 | rs9271914            | 32596238 | C                                    | ADD | 145882 | 0.8128 | -9.584 | 9.34E-22 |
| 6 | rs9271915            | 32596294 | C                                    | ADD | 147305 | 0.8083 | -9.888 | 4.69E-23 |
| 6 | rs2036202            | 32596309 | C                                    | ADD | 148519 | 1.168  | 5.876  | 4.19E-09 |
| 6 | rs9271917            | 32596336 | G                                    | ADD | 148062 | 0.8092 | -9.87  | 5.63E-23 |
| 6 | rs9271918            | 32596352 | T                                    | ADD | 148464 | 0.8071 | -9.998 | 1.55E-23 |
| 6 | rs9271919            | 32596423 | G                                    | ADD | 148608 | 0.8046 | -10.14 | 3.66E-24 |
| 6 | rs202092176          | 32596429 | T                                    | ADD | 139981 | 0.6776 | -6.704 | 2.03E-11 |
| 6 | rs9271920            | 32596430 | G                                    | ADD | 126066 | 0.7993 | -9.453 | 3.28E-21 |
| 6 | rs9271921            | 32596431 | G                                    | ADD | 126066 | 0.7993 | -9.453 | 3.28E-21 |
| 6 | rs9271922            | 32596444 | A                                    | ADD | 141289 | 0.8043 | -9.842 | 7.44E-23 |
| 6 | rs116489113          | 32596496 | G                                    | ADD | 148656 | 0.6236 | -8.006 | 1.18E-15 |
| 6 | rs9271924            | 32596498 | A                                    | ADD | 91943  | 0.7636 | -8.249 | 1.59E-16 |
| 6 | rs9271925            | 32596540 | G                                    | ADD | 89952  | 0.7774 | -7.445 | 9.73E-14 |
| 6 | rs9271926            | 32596566 | T                                    | ADD | 89950  | 0.7774 | -7.445 | 9.71E-14 |
| 6 | rs9271927            | 32596647 | C                                    | ADD | 146399 | 0.8022 | -10.18 | 2.49E-24 |
| 6 | rs9271928            | 32596648 | A                                    | ADD | 142721 | 0.8064 | -9.807 | 1.05E-22 |
| 6 | rs9271929            | 32596650 | C                                    | ADD | 142717 | 0.8026 | -9.98  | 1.86E-23 |
| 6 | 6:32596661_TG<br>_T  | 32596661 | T                                    | ADD | 141594 | 0.8042 | -9.897 | 4.27E-23 |
| 6 | rs9271930            | 32596677 | G                                    | ADD | 145618 | 0.8046 | -10.05 | 9.63E-24 |
| 6 | rs9271932            | 32596714 | C                                    | ADD | 147188 | 0.8049 | -10.09 | 5.83E-24 |
| 6 | rs9271933            | 32596717 | A                                    | ADD | 147188 | 0.8049 | -10.09 | 5.83E-24 |
| 6 | rs9271934            | 32596773 | T                                    | ADD | 148749 | 0.805  | -10.12 | 4.34E-24 |
| 6 | 6:32596798_A<br>G_A  | 32596798 | A                                    | ADD | 148665 | 0.66   | -9.526 | 1.63E-21 |
| 6 | 6:32596817_TT<br>C_T | 32596817 | T                                    | ADD | 146896 | 0.8039 | -10.14 | 3.70E-24 |
| 6 | rs9271935            | 32596831 | C                                    | ADD | 146896 | 0.8039 | -10.14 | 3.77E-24 |

|   |                       |          |   |     |        |        |        |          |
|---|-----------------------|----------|---|-----|--------|--------|--------|----------|
| 6 | 6:32596838_AT<br>TG_A | 32596838 | A | ADD | 148677 | 1.133  | 5.757  | 8.55E-09 |
| 6 | rs73728889            | 32596856 | G | ADD | 148651 | 0.6605 | -9.51  | 1.90E-21 |
| 6 | rs9271937             | 32596870 | G | ADD | 145595 | 0.8082 | -9.845 | 7.17E-23 |
| 6 | rs541843223           | 32596877 | T | ADD | 148167 | 0.6217 | -7.919 | 2.39E-15 |
| 6 | rs116098252           | 32596890 | C | ADD | 146653 | 0.6249 | -7.272 | 3.55E-13 |
| 6 | rs9271939             | 32596921 | C | ADD | 146092 | 0.8084 | -9.85  | 6.87E-23 |
| 6 | rs6928873             | 32596946 | A | ADD | 147378 | 0.8282 | -7.96  | 1.72E-15 |
| 6 | rs115826298           | 32596985 | A | ADD | 148622 | 0.6233 | -8     | 1.25E-15 |
| 6 | rs6929057             | 32597005 | C | ADD | 146019 | 0.7814 | -9.391 | 5.94E-21 |
| 6 | rs3129769             | 32597022 | A | ADD | 147088 | 1.229  | 8.049  | 8.37E-16 |
| 6 | rs9271945             | 32597034 | A | ADD | 148685 | 0.8043 | -10.16 | 2.88E-24 |
| 6 | 6:32597087_CA<br>_C   | 32597087 | C | ADD | 148684 | 1.149  | 6.428  | 1.30E-10 |
| 6 | rs9271947             | 32597095 | T | ADD | 117771 | 0.784  | -9.567 | 1.10E-21 |
| 6 | 6:32597096_A<br>AC_A  | 32597096 | A | ADD | 148736 | 0.8057 | -10.08 | 6.52E-24 |
| 6 | rs9271948             | 32597105 | A | ADD | 145458 | 0.8172 | -9.328 | 1.08E-20 |
| 6 | rs9271951             | 32597172 | A | ADD | 145745 | 0.812  | -9.637 | 5.58E-22 |
| 6 | rs9271954             | 32597216 | C | ADD | 147531 | 0.806  | -10.03 | 1.12E-23 |
| 6 | rs9271955             | 32597281 | A | ADD | 148582 | 0.8063 | -10.05 | 9.12E-24 |
| 6 | rs9271957             | 32597335 | C | ADD | 148582 | 0.8063 | -10.05 | 9.33E-24 |
| 6 | rs9271959             | 32597377 | C | ADD | 146737 | 0.8105 | -9.744 | 1.95E-22 |
| 6 | rs1281944             | 32597379 | C | ADD | 134496 | 1.245  | 6.721  | 1.80E-11 |
| 6 | rs9271960             | 32597385 | T | ADD | 146735 | 0.8105 | -9.744 | 1.96E-22 |
| 6 | rs9271961             | 32597412 | A | ADD | 139640 | 0.8086 | -9.572 | 1.05E-21 |
| 6 | rs9271962             | 32597434 | C | ADD | 140411 | 0.8024 | -9.951 | 2.50E-23 |
| 6 | rs9271963             | 32597453 | A | ADD | 138272 | 0.8021 | -9.827 | 8.63E-23 |
| 6 | rs9271964             | 32597464 | C | ADD | 134978 | 0.8049 | -9.547 | 1.34E-21 |
| 6 | rs9271966             | 32597507 | T | ADD | 134172 | 0.8048 | -9.55  | 1.30E-21 |
| 6 | rs9271968             | 32597529 | G | ADD | 133214 | 0.8104 | -9.237 | 2.53E-20 |
| 6 | rs189302941           | 32597537 | A | ADD | 88736  | 0.7156 | -6.657 | 2.79E-11 |
| 6 | rs9271970             | 32597550 | A | ADD | 133636 | 0.8145 | -9.04  | 1.57E-19 |
| 6 | rs9271972             | 32597567 | T | ADD | 133179 | 0.8488 | -7.098 | 1.27E-12 |
| 6 | rs543085682           | 32597598 | T | ADD | 146474 | 0.6396 | -6.995 | 2.66E-12 |
| 6 | rs9271976             | 32597617 | C | ADD | 133984 | 0.8071 | -9.454 | 3.27E-21 |
| 6 | rs9271977             | 32597623 | A | ADD | 134048 | 0.8073 | -9.448 | 3.45E-21 |
| 6 | rs9271978             | 32597632 | C | ADD | 128656 | 0.8097 | -9.059 | 1.31E-19 |
| 6 | rs9271979             | 32597635 | C | ADD | 128225 | 0.8454 | -7.065 | 1.60E-12 |
| 6 | rs9271981             | 32597639 | C | ADD | 128527 | 0.8106 | -9.011 | 2.04E-19 |
| 6 | rs9271983             | 32597647 | T | ADD | 129371 | 0.8133 | -8.921 | 4.64E-19 |

|   |                        |          |   |     |        |        |        |          |
|---|------------------------|----------|---|-----|--------|--------|--------|----------|
| 6 | rs9271984              | 32597669 | G | ADD | 128008 | 0.8173 | -8.655 | 4.95E-18 |
| 6 | rs9271985              | 32597679 | T | ADD | 128022 | 0.8172 | -8.66  | 4.74E-18 |
| 6 | rs9271986              | 32597700 | A | ADD | 128215 | 0.8169 | -8.668 | 4.41E-18 |
| 6 | rs9271987              | 32597716 | G | ADD | 129216 | 0.8169 | -8.664 | 4.57E-18 |
| 6 | rs9271988              | 32597725 | A | ADD | 129244 | 0.8172 | -8.648 | 5.22E-18 |
| 6 | rs9271989              | 32597729 | T | ADD | 129256 | 0.8171 | -8.654 | 4.99E-18 |
| 6 | rs9271990              | 32597735 | T | ADD | 129473 | 0.8159 | -8.723 | 2.71E-18 |
| 6 | rs9271991              | 32597738 | G | ADD | 129473 | 0.8159 | -8.723 | 2.70E-18 |
| 6 | rs9271995              | 32597777 | A | ADD | 131134 | 0.8146 | -8.88  | 6.70E-19 |
| 6 | rs9271997              | 32597801 | A | ADD | 146901 | 0.836  | -7.614 | 2.66E-14 |
| 6 | rs2395518              | 32597812 | C | ADD | 147262 | 1.215  | 7.604  | 2.87E-14 |
| 6 | 6:32597821_TG<br>_T    | 32597821 | T | ADD | 145735 | 0.8088 | -9.818 | 9.40E-23 |
| 6 | rs9271999              | 32597832 | G | ADD | 145910 | 0.8089 | -9.811 | 1.01E-22 |
| 6 | rs9272000              | 32597834 | T | ADD | 145910 | 0.8089 | -9.811 | 1.01E-22 |
| 6 | rs9272001              | 32597901 | G | ADD | 145361 | 0.807  | -9.891 | 4.57E-23 |
| 6 | rs9272002              | 32597924 | G | ADD | 144790 | 0.8411 | -7.873 | 3.46E-15 |
| 6 | rs9272003              | 32597940 | G | ADD | 144788 | 0.8411 | -7.874 | 3.43E-15 |
| 6 | rs9272004              | 32597964 | A | ADD | 140410 | 0.8042 | -9.842 | 7.44E-23 |
| 6 | rs9272005              | 32597992 | G | ADD | 140345 | 0.8035 | -9.874 | 5.42E-23 |
| 6 | rs9272006              | 32597993 | T | ADD | 140345 | 0.8035 | -9.874 | 5.42E-23 |
| 6 | rs9272007              | 32598038 | T | ADD | 147570 | 0.8047 | -10.1  | 5.52E-24 |
| 6 | rs9272008              | 32598042 | A | ADD | 147516 | 0.8049 | -10.09 | 6.07E-24 |
| 6 | rs9272009              | 32598063 | T | ADD | 147899 | 0.8051 | -10.09 | 5.97E-24 |
| 6 | rs2395519              | 32598067 | C | ADD | 147994 | 1.223  | 7.921  | 2.35E-15 |
| 6 | rs1281943              | 32598090 | C | ADD | 141402 | 1.286  | 6.865  | 6.67E-12 |
| 6 | rs9272012              | 32598156 | A | ADD | 134372 | 0.8202 | -8.734 | 2.46E-18 |
|   |                        |          | G |     |        |        |        |          |
|   |                        |          | T |     |        |        |        |          |
|   |                        |          | A |     |        |        |        |          |
|   |                        |          | T |     |        |        |        |          |
| 6 | rs376422579            | 32598161 | C | ADD | 134055 | 0.8203 | -8.718 | 2.83E-18 |
| 6 | rs139089699            | 32598180 | A | ADD | 147241 | 0.6208 | -7.649 | 2.02E-14 |
| 6 | rs9272013              | 32598224 | T | ADD | 148521 | 0.8066 | -10.03 | 1.17E-23 |
| 6 | rs11970000             | 32598291 | G | ADD | 148147 | 0.7698 | -9.796 | 1.18E-22 |
| 6 | rs9272015              | 32598299 | A | ADD | 147795 | 0.806  | -10.04 | 1.02E-23 |
| 6 | 6:32598314_AT<br>TTG_A | 32598314 | A | ADD | 147758 | 0.8062 | -10.03 | 1.17E-23 |
| 6 | rs9272016              | 32598346 | T | ADD | 147961 | 0.8059 | -10.05 | 9.37E-24 |
| 6 | rs115527034            | 32598356 | C | ADD | 148614 | 0.6234 | -7.997 | 1.27E-15 |
| 6 | rs112313206            | 32598405 | T | ADD | 144194 | 0.8155 | -9.383 | 6.43E-21 |
| 6 | rs7771138              | 32598419 | A | ADD | 140205 | 0.7673 | -9.282 | 1.66E-20 |



|   |                          |          |   |     |        |        |        |          |
|---|--------------------------|----------|---|-----|--------|--------|--------|----------|
| 6 | rs7770879                | 32598423 | A | ADD | 140205 | 0.7673 | -9.282 | 1.66E-20 |
| 6 | 6:32598432_TG<br>CAGAA_T | 32598432 | T | ADD | 139920 | 0.8127 | -9.369 | 7.30E-21 |
| 6 | rs148437409              | 32598479 | C | ADD | 139914 | 0.8125 | -9.38  | 6.59E-21 |
| 6 | rs558095162              | 32598504 | T | ADD | 143259 | 0.8084 | -9.746 | 1.93E-22 |
| 6 | rs9272021                | 32598515 | G | ADD | 145433 | 1.211  | 7.679  | 1.61E-14 |
| 6 | rs9272022                | 32598529 | G | ADD | 144603 | 0.8066 | -9.891 | 4.56E-23 |
| 6 | rs9272023                | 32598558 | G | ADD | 145141 | 0.8199 | -9.226 | 2.80E-20 |
| 6 | rs9272025                | 32598581 | A | ADD | 148362 | 1.135  | 5.812  | 6.17E-09 |
| 6 | rs9272026                | 32598618 | G | ADD | 148293 | 0.8048 | -10.12 | 4.35E-24 |
| 6 | rs9272027                | 32598622 | G | ADD | 148292 | 0.8048 | -10.12 | 4.37E-24 |
| 6 | rs151002495              | 32598680 | A | ADD | 148636 | 0.6225 | -8.021 | 1.05E-15 |
| 6 | rs9272028                | 32598706 | T | ADD | 148194 | 0.8052 | -10.09 | 5.86E-24 |
| 6 | rs9272029                | 32598707 | G | ADD | 148194 | 0.8052 | -10.09 | 5.86E-24 |
| 6 | 6:32598754_CT<br>GG_C    | 32598754 | C | ADD | 140395 | 0.8    | -8.66  | 4.70E-18 |
| 6 | rs114354029              | 32598764 | G | ADD | 146181 | 0.8065 | -9.965 | 2.17E-23 |
| 6 | rs9272031                | 32598779 | C | ADD | 146203 | 0.8065 | -9.965 | 2.18E-23 |
| 6 | rs9272032                | 32598782 | G | ADD | 146145 | 0.806  | -9.992 | 1.65E-23 |
| 6 | rs7758269                | 32598812 | C | ADD | 147082 | 0.848  | -7.196 | 6.21E-13 |
| 6 | rs9272035                | 32598814 | T | ADD | 146179 | 0.8081 | -9.875 | 5.35E-23 |
| 6 | rs9272036                | 32598841 | A | ADD | 147532 | 0.8212 | -9.232 | 2.66E-20 |
| 6 | rs9272037                | 32598844 | C | ADD | 147452 | 0.8077 | -9.929 | 3.10E-23 |
| 6 | rs3104381                | 32598854 | A | ADD | 148670 | 1.22   | 7.835  | 4.70E-15 |
| 6 | rs9272040                | 32598903 | G | ADD | 148748 | 0.8189 | -9.389 | 6.06E-21 |
| 6 | rs9272041                | 32598906 | A | ADD | 148748 | 0.8189 | -9.389 | 6.06E-21 |
| 6 | rs9272042                | 32598917 | C | ADD | 148748 | 0.8189 | -9.389 | 6.06E-21 |
| 6 | rs9272043                | 32598946 | G | ADD | 148753 | 0.8189 | -9.389 | 6.05E-21 |
| 6 | rs9272044                | 32598971 | A | ADD | 148756 | 0.8054 | -10.1  | 5.40E-24 |
| 6 | rs9272045                | 32599006 | T | ADD | 148652 | 0.8193 | -9.365 | 7.60E-21 |
| 6 | rs9272049                | 32599045 | G | ADD | 148645 | 0.8059 | -10.07 | 7.45E-24 |
| 6 | rs9272050                | 32599071 | G | ADD | 148680 | 1.265  | 11.04  | 2.51E-28 |
| 6 | rs3104378                | 32599163 | T | ADD | 148158 | 1.209  | 7.497  | 6.54E-14 |
| 6 | rs9272054                | 32599164 | A | ADD | 147281 | 0.809  | -9.834 | 8.05E-23 |
| 6 | rs9272055                | 32599176 | A | ADD | 146590 | 0.8073 | -9.908 | 3.84E-23 |
| 6 | rs9272056                | 32599180 | A | ADD | 146617 | 0.8208 | -9.21  | 3.27E-20 |
| 6 | rs9272057                | 32599190 | A | ADD | 146622 | 0.8208 | -9.212 | 3.19E-20 |
| 6 | rs9272059                | 32599223 | C | ADD | 148652 | 0.804  | -10.17 | 2.73E-24 |
| 6 | rs9272061                | 32599250 | A | ADD | 148622 | 0.8059 | -10.07 | 7.44E-24 |
| 6 | rs9272062                | 32599265 | A | ADD | 148647 | 0.8196 | -9.346 | 9.10E-21 |

|   |                 |          |   |     |        |        |        |          |
|---|-----------------|----------|---|-----|--------|--------|--------|----------|
| 6 | rs35779452      | 32599272 | G | ADD | 148608 | 0.7699 | -9.834 | 8.08E-23 |
| 6 | rs34061722      | 32599337 | T | ADD | 148609 | 0.7699 | -9.831 | 8.25E-23 |
| 6 | rs9272064       | 32599338 | T | ADD | 148751 | 0.8054 | -10.1  | 5.29E-24 |
| 6 | rs9272067       | 32599401 | A | ADD | 148687 | 0.8044 | -10.15 | 3.20E-24 |
| 6 | rs35360625      | 32599435 | C | ADD | 147743 | 0.7707 | -9.781 | 1.35E-22 |
| 6 | 6:32599462_AT_A | 32599462 | A | ADD | 148140 | 0.6222 | -7.904 | 2.71E-15 |
| 6 | rs9272070       | 32599485 | G | ADD | 148738 | 0.8188 | -9.392 | 5.88E-21 |
| 6 | rs9272071       | 32599487 | C | ADD | 148002 | 0.8394 | -8.068 | 7.12E-16 |
| 6 | rs540002313     | 32599555 | A | ADD | 140473 | 0.7778 | -8.85  | 8.77E-19 |
| 6 | rs9272072       | 32599563 | G | ADD | 139338 | 0.8126 | -9.369 | 7.34E-21 |
| 6 | rs9272073       | 32599570 | T | ADD | 139319 | 0.8126 | -9.369 | 7.30E-21 |
| 6 | rs9272074       | 32599571 | G | ADD | 139603 | 0.8244 | -8.799 | 1.38E-18 |
| 6 | rs9272075       | 32599593 | G | ADD | 136753 | 0.8174 | -9.015 | 1.97E-19 |
| 6 | rs147857322     | 32599601 | A | ADD | 138025 | 0.8123 | -7.596 | 3.06E-14 |
| 6 | rs9272076       | 32599624 | T | ADD | 135117 | 0.8218 | -8.711 | 3.02E-18 |
| 6 | rs9272077       | 32599625 | G | ADD | 135117 | 0.8218 | -8.711 | 3.02E-18 |
| 6 | rs9272079       | 32599632 | T | ADD | 133820 | 0.821  | -8.46  | 2.66E-17 |
| 6 | rs9272080       | 32599633 | G | ADD | 133820 | 0.821  | -8.46  | 2.66E-17 |
| 6 | rs9272081       | 32599655 | C | ADD | 133558 | 0.8236 | -8.627 | 6.31E-18 |
| 6 | rs9272084       | 32599680 | T | ADD | 134688 | 0.8039 | -9.624 | 6.31E-22 |
| 6 | rs9272085       | 32599685 | C | ADD | 135409 | 0.8149 | -9.145 | 5.98E-20 |
| 6 | rs9272086       | 32599688 | T | ADD | 134694 | 0.8038 | -9.628 | 6.06E-22 |
| 6 | rs550053442     | 32599693 | A | ADD | 137180 | 0.7515 | -9.656 | 4.65E-22 |
| 6 | rs9272090       | 32599736 | C | ADD | 139020 | 0.8179 | -9.131 | 6.76E-20 |
| 6 | rs9272091       | 32599745 | C | ADD | 139018 | 0.818  | -9.13  | 6.85E-20 |
| 6 | rs9272092       | 32599756 | C | ADD | 133153 | 0.8081 | -9.334 | 1.02E-20 |
| 6 | rs9272093       | 32599777 | T | ADD | 130750 | 0.8104 | -9.068 | 1.22E-19 |
| 6 | rs9272094       | 32599781 | C | ADD | 129273 | 0.8154 | -8.882 | 6.56E-19 |
| 6 | rs9272095       | 32599782 | A | ADD | 128675 | 0.8093 | -9.038 | 1.59E-19 |
| 6 | rs9272096       | 32599784 | C | ADD | 129272 | 0.8154 | -8.882 | 6.56E-19 |
| 6 | rs9272097       | 32599786 | T | ADD | 128714 | 0.809  | -9.056 | 1.35E-19 |
| 6 | rs9272098       | 32599787 | G | ADD | 128714 | 0.809  | -9.056 | 1.35E-19 |
| 6 | rs9272099       | 32599813 | G | ADD | 140835 | 0.8025 | -9.966 | 2.14E-23 |
| 6 | rs9272102       | 32599830 | C | ADD | 141118 | 0.8019 | -10.01 | 1.40E-23 |
| 6 | rs11751908      | 32599862 | G | ADD | 144149 | 0.7693 | -9.502 | 2.06E-21 |
| 6 | rs9272103       | 32599896 | T | ADD | 148777 | 0.8053 | -10.11 | 5.07E-24 |
| 6 | rs9272104       | 32599918 | C | ADD | 144292 | 0.8178 | -9.309 | 1.29E-20 |
| 6 | rs142794334     | 32599945 | T | ADD | 145696 | 0.7996 | -10.31 | 6.31E-25 |

|   |                      |          | A<br>C<br>A |     |        |        |        |          |
|---|----------------------|----------|-------------|-----|--------|--------|--------|----------|
| 6 | rs9272105            | 32599999 | A           | ADD | 148783 | 0.8187 | -9.408 | 5.04E-21 |
| 6 | rs35585151           | 32600046 | A           | ADD | 148625 | 0.8019 | -8.684 | 3.81E-18 |
| 6 | rs35242582           | 32600057 | G           | ADD | 148783 | 0.771  | -9.792 | 1.21E-22 |
| 6 | rs34180045           | 32600066 | G           | ADD | 147334 | 0.7753 | -9.499 | 2.12E-21 |
| 6 | rs34107231           | 32600074 | G           | ADD | 147150 | 0.7753 | -9.482 | 2.49E-21 |
| 6 | rs35635298           | 32600079 | C           | ADD | 147148 | 0.7753 | -9.48  | 2.54E-21 |
| 6 | rs35744886           | 32600084 | T           | ADD | 147149 | 0.7753 | -9.48  | 2.53E-21 |
| 6 | rs35828545           | 32600099 | C           | ADD | 147183 | 0.7759 | -9.459 | 3.10E-21 |
| 6 | rs3104375            | 32600101 | C           | ADD | 148736 | 1.22   | 7.828  | 4.96E-15 |
| 6 | rs35426875           | 32600135 | C           | ADD | 147318 | 0.7765 | -9.448 | 3.46E-21 |
| 6 | rs35656734           | 32600153 | T           | ADD | 148626 | 0.7997 | -8.785 | 1.56E-18 |
| 6 | 6:32600200_CT<br>G_C | 32600200 | C           | ADD | 145061 | 0.7991 | -7.629 | 2.37E-14 |
| 6 | rs34927613           | 32600211 | A           | ADD | 146149 | 0.7723 | -9.52  | 1.74E-21 |
| 6 | rs9272108            | 32600228 | C           | ADD | 148740 | 0.8055 | -10.1  | 5.76E-24 |
| 6 | rs13211123           | 32600249 | C           | ADD | 147363 | 0.7695 | -9.731 | 2.21E-22 |
| 6 | rs9272109            | 32600253 | T           | ADD | 146648 | 0.8107 | -9.731 | 2.23E-22 |
| 6 | rs9272110            | 32600287 | C           | ADD | 147429 | 0.805  | -10.08 | 7.01E-24 |
| 6 | rs9272113            | 32600291 | C           | ADD | 147429 | 0.805  | -10.08 | 7.01E-24 |
| 6 | rs9272114            | 32600317 | C           | ADD | 148723 | 0.8191 | -9.379 | 6.66E-21 |
| 6 | rs9272116            | 32600404 | C           | ADD | 148783 | 0.8196 | -9.346 | 9.12E-21 |
| 6 | rs9272117            | 32600411 | T           | ADD | 148737 | 0.8057 | -10.08 | 6.51E-24 |
| 6 | rs9272118            | 32600448 | T           | ADD | 148734 | 0.8192 | -9.369 | 7.33E-21 |
| 6 | rs9272119            | 32600470 | C           | ADD | 148079 | 0.8087 | -9.891 | 4.58E-23 |
| 6 | rs115883274          | 32600473 | C           | ADD | 148217 | 0.6199 | -7.967 | 1.63E-15 |
| 6 | 6:32600482_GT<br>_G  | 32600482 | G           | ADD | 148079 | 0.8087 | -9.89  | 4.60E-23 |
| 6 | rs9272120            | 32600501 | G           | ADD | 148729 | 0.8055 | -10.1  | 5.72E-24 |
| 6 | rs13211628           | 32600548 | G           | ADD | 146040 | 0.803  | -7.606 | 2.84E-14 |
| 6 | rs9272121            | 32600556 | C           | ADD | 146161 | 0.8107 | -9.714 | 2.62E-22 |
| 6 | rs9272122            | 32600562 | C           | ADD | 146840 | 1.262  | 10.9   | 1.22E-27 |
| 6 | rs9272124            | 32600581 | A           | ADD | 144503 | 0.8148 | -9.421 | 4.48E-21 |
| 6 | rs9272125            | 32600584 | G           | ADD | 144508 | 0.8278 | -8.761 | 1.94E-18 |
| 6 | rs9272126            | 32600589 | C           | ADD | 144510 | 0.8278 | -8.761 | 1.94E-18 |
| 6 | rs9272127            | 32600595 | C           | ADD | 144475 | 0.8274 | -8.78  | 1.64E-18 |
| 6 | rs9272128            | 32600601 | A           | ADD | 145702 | 0.8129 | -9.568 | 1.09E-21 |
| 6 | rs9272129            | 32600602 | T           | ADD | 143243 | 0.8103 | -9.624 | 6.35E-22 |
| 6 | rs148418496          | 32600607 | A           | ADD | 146480 | 0.6252 | -7.207 | 5.72E-13 |

|   |             |          |   |     |        |        |        |          |
|---|-------------|----------|---|-----|--------|--------|--------|----------|
| 6 | rs9272130   | 32600638 | G | ADD | 148737 | 0.8056 | -10.09 | 6.12E-24 |
| 6 | rs9272132   | 32600677 | G | ADD | 148700 | 0.8196 | -9.352 | 8.60E-21 |
| 6 | rs9272134   | 32600705 | G | ADD | 147568 | 0.8052 | -10.07 | 7.37E-24 |
| 6 | rs9272135   | 32600723 | A | ADD | 144475 | 0.8054 | -9.947 | 2.59E-23 |
| 6 | rs9272136   | 32600730 | T | ADD | 144475 | 0.8054 | -9.947 | 2.59E-23 |
| 6 | rs9272137   | 32600738 | C | ADD | 144474 | 0.8054 | -9.947 | 2.59E-23 |
| 6 | rs9272138   | 32600757 | A | ADD | 144674 | 0.8055 | -9.946 | 2.63E-23 |
| 6 | rs9272141   | 32600797 | A | ADD | 140554 | 0.8063 | -9.753 | 1.79E-22 |
| 6 | rs9272142   | 32600800 | C | ADD | 141796 | 0.8179 | -9.226 | 2.81E-20 |
| 6 | rs9272143   | 32600803 | C | ADD | 147574 | 0.8046 | -10.12 | 4.70E-24 |
| 6 | rs9272146   | 32600914 | C | ADD | 148700 | 0.8052 | -10.11 | 4.97E-24 |
| 6 | rs9272147   | 32600976 | G | ADD | 143422 | 0.8326 | -8.472 | 2.41E-17 |
| 6 | rs9272148   | 32600980 | C | ADD | 143414 | 0.8202 | -9.096 | 9.33E-20 |
| 6 | rs3104372   | 32600983 | T | ADD | 145016 | 1.189  | 6.95   | 3.66E-12 |
| 6 | rs9272150   | 32601000 | A | ADD | 131560 | 0.8136 | -8.977 | 2.78E-19 |
| 6 | rs9272151   | 32601005 | G | ADD | 131559 | 0.8137 | -8.973 | 2.89E-19 |
| 6 | rs9272152   | 32601007 | A | ADD | 131562 | 0.8137 | -8.973 | 2.88E-19 |
| 6 | rs9272153   | 32601018 | C | ADD | 135438 | 0.8137 | -9.15  | 5.72E-20 |
| 6 | rs9272154   | 32601019 | A | ADD | 130633 | 0.8149 | -8.408 | 4.15E-17 |
| 6 | rs9272155   | 32601043 | C | ADD | 140428 | 0.8274 | -8.695 | 3.46E-18 |
| 6 | rs9272156   | 32601081 | C | ADD | 142264 | 0.8162 | -9.266 | 1.92E-20 |
| 6 | rs1826962   | 32601083 | C | ADD | 143659 | 1.196  | 7.135  | 9.71E-13 |
| 6 | rs9272158   | 32601122 | A | ADD | 137366 | 0.816  | -9.11  | 8.22E-20 |
| 6 | rs9272160   | 32601130 | A | ADD | 134812 | 0.826  | -8.595 | 8.36E-18 |
| 6 | rs9272161   | 32601139 | G | ADD | 131856 | 0.8207 | -8.644 | 5.41E-18 |
| 6 | rs9272162   | 32601140 | A | ADD | 131856 | 0.8207 | -8.644 | 5.41E-18 |
| 6 | rs9272163   | 32601146 | T | ADD | 131856 | 0.8206 | -8.645 | 5.36E-18 |
| 6 | rs13215699  | 32601153 | A | ADD | 126240 | 0.7934 | -6.776 | 1.24E-11 |
| 6 | rs9272164   | 32601154 | C | ADD | 131853 | 0.8261 | -8.471 | 2.43E-17 |
| 6 | rs9272165   | 32601170 | C | ADD | 133533 | 0.8165 | -8.917 | 4.77E-19 |
| 6 | rs9272166   | 32601209 | C | ADD | 143935 | 0.8169 | -9.286 | 1.61E-20 |
| 6 | rs9272167   | 32601212 | A | ADD | 142052 | 0.8295 | -8.631 | 6.07E-18 |
| 6 | rs9272170   | 32601243 | G | ADD | 141807 | 0.8298 | -8.609 | 7.39E-18 |
| 6 | rs9272171   | 32601249 | G | ADD | 143690 | 0.8176 | -9.238 | 2.52E-20 |
| 6 | rs9272172   | 32601260 | C | ADD | 141807 | 0.8298 | -8.608 | 7.42E-18 |
| 6 | rs114651315 | 32601278 | T | ADD | 140023 | 0.825  | -6.517 | 7.19E-11 |
| 6 | rs72848251  | 32601288 | A | ADD | 137930 | 0.8154 | -6.889 | 5.64E-12 |
| 6 | rs9272174   | 32601307 | T | ADD | 143913 | 0.8176 | -9.251 | 2.23E-20 |

|   |             |          |   |     |        |        |        |          |
|---|-------------|----------|---|-----|--------|--------|--------|----------|
| 6 | rs2002777   | 32601332 | G | ADD | 142494 | 1.235  | 9.723  | 2.40E-22 |
| 6 | rs72848254  | 32601375 | G | ADD | 140376 | 0.8265 | -6.478 | 9.30E-11 |
| 6 | rs73728598  | 32601447 | G | ADD | 141414 | 0.8277 | -6.513 | 7.36E-11 |
| 6 | rs9272179   | 32601451 | C | ADD | 143025 | 0.8303 | -8.623 | 6.50E-18 |
| 6 | rs9272180   | 32601461 | T | ADD | 143031 | 0.8302 | -8.626 | 6.34E-18 |
| 6 | rs72848256  | 32601531 | G | ADD | 140647 | 0.8079 | -7.401 | 1.36E-13 |
| 6 | rs9272182   | 32601564 | A | ADD | 143121 | 0.8298 | -8.661 | 4.66E-18 |
| 6 | rs9272183   | 32601604 | T | ADD | 142556 | 0.8322 | -8.514 | 1.69E-17 |
| 6 | rs9272185   | 32601620 | A | ADD | 142556 | 0.8319 | -8.53  | 1.46E-17 |
| 6 | rs9272186   | 32601635 | T | ADD | 142548 | 0.832  | -8.527 | 1.51E-17 |
| 6 | rs114803358 | 32601708 | A | ADD | 144437 | 0.7846 | -8.779 | 1.65E-18 |
| 6 | rs115566240 | 32601718 | T | ADD | 141161 | 0.8064 | -7.97  | 1.59E-15 |
| 6 | rs114567049 | 32601719 | A | ADD | 143328 | 0.7836 | -8.711 | 3.02E-18 |
| 6 | rs9272193   | 32601785 | G | ADD | 143232 | 0.8161 | -9.375 | 6.94E-21 |
| 6 | rs72848261  | 32601790 | C | ADD | 141041 | 0.7653 | -9.269 | 1.88E-20 |
| 6 | rs114020256 | 32601797 | A | ADD | 138200 | 0.7724 | -9.081 | 1.07E-19 |
| 6 | rs9272194   | 32601825 | G | ADD | 137805 | 0.8176 | -9.098 | 9.23E-20 |
| 6 | rs9272195   | 32601830 | G | ADD | 139173 | 0.8116 | -9.38  | 6.57E-21 |
| 6 | rs112216801 | 32601838 | A | ADD | 136216 | 0.7807 | -8.227 | 1.92E-16 |
| 6 | rs151005270 | 32601874 | T | ADD | 136934 | 0.7895 | -7.906 | 2.66E-15 |
| 6 | rs9272201   | 32601875 | G | ADD | 137284 | 0.8223 | -8.838 | 9.76E-19 |
| 6 | rs113861133 | 32601911 | C | ADD | 134040 | 0.7824 | -7.892 | 2.98E-15 |
| 6 | rs116630455 | 32601946 | C | ADD | 137013 | 0.7686 | -8.747 | 2.19E-18 |
| 6 | rs9272207   | 32601966 | C | ADD | 136099 | 0.8214 | -8.873 | 7.11E-19 |
| 6 | rs371225543 | 32601968 | T | ADD | 136982 | 0.7633 | -8.947 | 3.65E-19 |
| 6 | rs139238973 | 32602002 | A | ADD | 140577 | 1.241  | 9.905  | 3.95E-23 |
| 6 | rs79428469  | 32602034 | C | ADD | 143957 | 0.7521 | -10.08 | 6.67E-24 |
| 6 | rs72848263  | 32602065 | C | ADD | 145554 | 0.7603 | -9.88  | 5.06E-23 |
| 6 | rs9272214   | 32602096 | A | ADD | 143403 | 0.8122 | -9.595 | 8.43E-22 |
| 6 | rs34145408  | 32602124 | T | ADD | 147928 | 0.7683 | -9.729 | 2.27E-22 |
| 6 | rs3104371   | 32602137 | G | ADD | 148404 | 1.208  | 7.584  | 3.35E-14 |
| 6 | rs17211454  | 32602179 | A | ADD | 147885 | 0.77   | -9.637 | 5.59E-22 |
| 6 | rs17205114  | 32602196 | G | ADD | 147889 | 0.77   | -9.636 | 5.63E-22 |
| 6 | rs17205128  | 32602217 | G | ADD | 145772 | 0.7633 | -9.745 | 1.94E-22 |
| 6 | rs17205135  | 32602222 | G | ADD | 145773 | 0.7633 | -9.746 | 1.92E-22 |
| 6 | rs9272218   | 32602238 | T | ADD | 148780 | 0.8189 | -9.392 | 5.87E-21 |
| 6 | rs9272221   | 32602334 | A | ADD | 145382 | 0.8113 | -9.715 | 2.60E-22 |
| 6 | rs9272226   | 32602396 | C | ADD | 148783 | 1.251  | 10.71  | 9.56E-27 |

|   |                        |          |                            |     |        |        |        |          |
|---|------------------------|----------|----------------------------|-----|--------|--------|--------|----------|
| 6 | rs17211510             | 32602430 | A                          | ADD | 148783 | 0.7679 | -9.858 | 6.31E-23 |
| 6 | rs17205170             | 32602483 | T                          | ADD | 148762 | 0.8367 | -6.173 | 6.70E-10 |
| 6 | 6:32602495_AC<br>T_A   | 32602495 | A                          | ADD | 148766 | 0.6214 | -8.083 | 6.31E-16 |
| 6 | rs17205177             | 32602518 | G                          | ADD | 148781 | 0.7674 | -9.879 | 5.14E-23 |
| 6 | rs17205184             | 32602551 | A                          | ADD | 148674 | 0.794  | -8.059 | 7.67E-16 |
| 6 | rs17205191             | 32602556 | A                          | ADD | 147577 | 0.7844 | -9.364 | 7.68E-21 |
| 6 | rs9272229              | 32602568 | T                          | ADD | 147585 | 0.8138 | -9.725 | 2.35E-22 |
| 6 | rs17211545             | 32602608 | C                          | ADD | 148739 | 0.7672 | -9.881 | 5.03E-23 |
| 6 | rs9272231              | 32602617 | T                          | ADD | 147718 | 0.8185 | -9.359 | 8.06E-21 |
| 6 | rs9272232              | 32602630 | T                          | ADD | 147797 | 0.8136 | -9.628 | 6.10E-22 |
| 6 | rs139299944            | 32602665 | C<br>T                     | ADD | 148384 | 0.8242 | -8.38  | 5.28E-17 |
| 6 | rs17211580             | 32602754 | A                          | ADD | 148746 | 0.7678 | -9.858 | 6.30E-23 |
| 6 | rs9272239              | 32602778 | G                          | ADD | 148250 | 0.8184 | -9.402 | 5.35E-21 |
| 6 | rs9272242              | 32602790 | C                          | ADD | 148252 | 0.8183 | -9.405 | 5.21E-21 |
| 6 | rs17211601             | 32602817 | G                          | ADD | 148722 | 0.7677 | -9.861 | 6.17E-23 |
| 6 | rs28533091             | 32602864 | A                          | ADD | 148722 | 0.7677 | -9.861 | 6.17E-23 |
| 6 | rs9272245              | 32602872 | C                          | ADD | 147763 | 1.259  | 10.66  | 1.59E-26 |
| 6 | rs28694749             | 32603029 | C                          | ADD | 148737 | 0.7683 | -9.835 | 7.96E-23 |
| 6 | rs9272254              | 32603098 | T                          | ADD | 148390 | 0.8194 | -9.348 | 8.89E-21 |
| 6 | 6:32603185_TT<br>GAC_T | 32603185 | T                          | ADD | 148667 | 0.7713 | -5.962 | 2.49E-09 |
| 6 | rs9272263              | 32603295 | C                          | ADD | 147644 | 0.8352 | -6.425 | 1.32E-10 |
| 6 | rs62404084             | 32603321 | T                          | ADD | 148562 | 0.7946 | -8.009 | 1.15E-15 |
| 6 | rs28407322             | 32603355 | C                          | ADD | 148628 | 0.7686 | -9.8   | 1.13E-22 |
| 6 | rs115878164            | 32603405 | T                          | ADD | 148679 | 0.6249 | -7.984 | 1.42E-15 |
| 6 | rs9272265              | 32603412 | T                          | ADD | 148694 | 0.8191 | -9.377 | 6.78E-21 |
| 6 | rs9272266              | 32603416 | A                          | ADD | 148368 | 0.7689 | -9.801 | 1.12E-22 |
| 6 | rs28675927             | 32603488 | G<br>C                     | ADD | 148472 | 0.7681 | -9.818 | 9.45E-23 |
| 6 | rs576432697            | 32603715 | T                          | ADD | 147470 | 0.626  | -7.566 | 3.84E-14 |
| 6 | rs1391371              | 32603798 | T<br>A<br>T<br>T<br>C<br>T | ADD | 148155 | 1.204  | 7.443  | 9.82E-14 |
| 6 | rs386699532            | 32604008 | T                          | ADD | 148111 | 1.137  | 5.902  | 3.59E-09 |
| 6 | rs9272318              | 32604059 | G                          | ADD | 146155 | 1.154  | 6.608  | 3.90E-11 |
| 6 | rs9272323              | 32604151 | T                          | ADD | 146763 | 1.141  | 6.039  | 1.55E-09 |
| 6 | rs9272335              | 32604259 | T                          | ADD | 144166 | 1.15   | 6.408  | 1.47E-10 |
| 6 | rs62404085             | 32604384 | A                          | ADD | 148783 | 0.6255 | -7.989 | 1.37E-15 |
| 6 | rs9272347              | 32604394 | C                          | ADD | 145208 | 1.152  | 6.53   | 6.56E-11 |

|   |                       |          |   |     |        |        |        |          |
|---|-----------------------|----------|---|-----|--------|--------|--------|----------|
| 6 | rs9272353             | 32604456 | C | ADD | 135679 | 1.255  | 8.05   | 8.28E-16 |
| 6 | rs9272358             | 32604538 | A | ADD | 135111 | 1.158  | 6.28   | 3.39E-10 |
| 6 | rs9272362             | 32604564 | T | ADD | 135062 | 1.158  | 6.3    | 2.98E-10 |
| 6 | rs9272363             | 32604585 | T | ADD | 135333 | 1.257  | 8.152  | 3.57E-16 |
| 6 | rs9272365             | 32604621 | C | ADD | 144640 | 1.151  | 6.42   | 1.36E-10 |
| 6 | rs9272366             | 32604622 | A | ADD | 144711 | 1.146  | 6.249  | 4.13E-10 |
| 6 | rs9272368             | 32604642 | G | ADD | 144685 | 1.146  | 6.244  | 4.27E-10 |
| 6 | rs9272370             | 32604644 | A | ADD | 144685 | 1.146  | 6.244  | 4.27E-10 |
| 6 | rs62404086            | 32604660 | T | ADD | 148241 | 0.6211 | -7.947 | 1.92E-15 |
| 6 | rs9272378             | 32604718 | G | ADD | 143988 | 1.153  | 6.527  | 6.73E-11 |
| 6 | rs9272380             | 32604732 | A | ADD | 143964 | 1.153  | 6.504  | 7.83E-11 |
| 6 | rs9272381             | 32604742 | C | ADD | 145146 | 1.229  | 8.402  | 4.38E-17 |
| 6 | rs6938008             | 32604743 | C | ADD | 143321 | 1.141  | 6.122  | 9.25E-10 |
| 6 | rs9272383             | 32604749 | T | ADD | 143983 | 0.8005 | -10.3  | 6.73E-25 |
| 6 | rs9272385             | 32604763 | C | ADD | 145047 | 1.23   | 8.427  | 3.54E-17 |
| 6 | rs9272390             | 32604795 | T | ADD | 144536 | 1.233  | 8.517  | 1.64E-17 |
| 6 | rs111590907           | 32604865 | T | ADD | 148708 | 0.6217 | -8.072 | 6.92E-16 |
| 6 | rs9272407             | 32604931 | A | ADD | 144159 | 1.15   | 6.382  | 1.75E-10 |
| 6 | rs9272417             | 32605078 | G | ADD | 145869 | 1.227  | 8.137  | 4.05E-16 |
| 6 | rs9272420             | 32605101 | G | ADD | 145840 | 1.151  | 6.475  | 9.51E-11 |
| 6 | rs9272422             | 32605132 | C | ADD | 147417 | 1.22   | 8.256  | 1.51E-16 |
| 6 | rs9272425             | 32605178 | C | ADD | 145863 | 1.229  | 8.413  | 4.00E-17 |
| 6 | rs1129735             | 32605295 | T | ADD | 147833 | 1.141  | 6.131  | 8.74E-10 |
| 6 | rs9272435             | 32605336 | A | ADD | 145791 | 1.153  | 6.534  | 6.41E-11 |
| 6 | rs9272443             | 32605418 | A | ADD | 144777 | 1.154  | 6.561  | 5.35E-11 |
| 6 | rs9272444             | 32605419 | C | ADD | 144777 | 1.154  | 6.561  | 5.35E-11 |
| 6 | rs9272456             | 32605555 | A | ADD | 145770 | 1.228  | 8.333  | 7.85E-17 |
| 6 | rs9272461             | 32605609 | A | ADD | 147315 | 1.204  | 7.361  | 1.83E-13 |
| 6 | rs9272463             | 32605646 | G | ADD | 144839 | 1.151  | 6.4    | 1.55E-10 |
| 6 | rs9272466             | 32605696 | T | ADD | 144823 | 1.224  | 8.062  | 7.52E-16 |
| 6 | rs9272472             | 32605724 | G | ADD | 144506 | 1.153  | 6.487  | 8.74E-11 |
| 6 | rs34481484            | 32605861 | G | ADD | 148654 | 0.6244 | -7.991 | 1.34E-15 |
| 6 | rs115444659           | 32605950 | T | ADD | 148700 | 0.6219 | -8.066 | 7.24E-16 |
| 6 | rs9272485             | 32605972 | G | ADD | 144573 | 1.149  | 6.309  | 2.81E-10 |
| 6 | 6:32606018_TT<br>TC_T | 32606018 | T | ADD | 145424 | 1.224  | 8.067  | 7.20E-16 |
| 6 | rs9272492             | 32606052 | G | ADD | 147044 | 1.145  | 6.289  | 3.20E-10 |
| 6 | rs9272498             | 32606217 | A | ADD | 143341 | 1.154  | 6.495  | 8.31E-11 |
| 6 | rs9272503             | 32606286 | C | ADD | 143483 | 1.156  | 6.581  | 4.66E-11 |

|   |             |          |   |     |        |        |        |          |
|---|-------------|----------|---|-----|--------|--------|--------|----------|
| 6 | rs9272510   | 32606367 | G | ADD | 142429 | 1.153  | 6.449  | 1.12E-10 |
| 6 | rs9272514   | 32606385 | T | ADD | 142414 | 1.153  | 6.463  | 1.03E-10 |
| 6 | rs527732063 | 32606476 | A | ADD | 123041 | 0.8267 | -6.465 | 1.01E-10 |
| 6 | rs567796452 | 32606482 | C | ADD | 147418 | 0.6277 | -7.522 | 5.39E-14 |
| 6 | rs531816759 | 32606483 | C | ADD | 147418 | 0.6277 | -7.522 | 5.39E-14 |
|   |             |          | G |     |        |        |        |          |
|   |             |          | G |     |        |        |        |          |
| 6 | rs113409319 | 32606500 | A | ADD | 148376 | 0.6256 | -7.927 | 2.25E-15 |
| 6 | rs373801706 | 32606560 | G | ADD | 146762 | 0.6245 | -7.993 | 1.32E-15 |
| 6 | rs41268938  | 32606616 | T | ADD | 143903 | 1.23   | 8.293  | 1.10E-16 |
| 6 | rs28383356  | 32606646 | C | ADD | 141569 | 1.155  | 6.511  | 7.48E-11 |
| 6 | rs28375776  | 32606658 | G | ADD | 147738 | 0.7498 | -7.802 | 6.11E-15 |
| 6 | rs34701372  | 32606676 | C | ADD | 148554 | 0.6252 | -7.97  | 1.59E-15 |
| 6 | rs28636516  | 32606701 | G | ADD | 148180 | 0.7738 | -7.377 | 1.62E-13 |
| 6 | rs75983419  | 32606721 | T | ADD | 148621 | 0.6224 | -8.052 | 8.16E-16 |
| 6 | rs28383357  | 32606732 | A | ADD | 142263 | 1.15   | 6.334  | 2.40E-10 |
| 6 | rs74379225  | 32606742 | G | ADD | 145032 | 0.6342 | -7.719 | 1.17E-14 |
| 6 | rs28383361  | 32606846 | A | ADD | 143488 | 1.15   | 6.354  | 2.10E-10 |
| 6 | rs28383362  | 32606864 | C | ADD | 143617 | 1.15   | 6.358  | 2.04E-10 |
| 6 | rs28383363  | 32606868 | C | ADD | 143617 | 1.15   | 6.358  | 2.04E-10 |
| 6 | rs9272544   | 32606878 | G | ADD | 142900 | 1.231  | 9.629  | 6.03E-22 |
| 6 | rs28383365  | 32606942 | A | ADD | 144802 | 1.149  | 6.329  | 2.47E-10 |
| 6 | rs78702533  | 32606960 | T | ADD | 148529 | 0.6249 | -7.977 | 1.50E-15 |
| 6 | rs41268940  | 32606987 | G | ADD | 145857 | 1.224  | 8.084  | 6.27E-16 |
| 6 | rs79772777  | 32607017 | A | ADD | 147306 | 0.6284 | -7.575 | 3.60E-14 |
| 6 | rs28383367  | 32607031 | T | ADD | 148068 | 1.134  | 5.801  | 6.60E-09 |
| 6 | rs41268942  | 32607126 | G | ADD | 148351 | 1.207  | 7.568  | 3.80E-14 |
| 6 | rs28383370  | 32607152 | C | ADD | 147797 | 1.134  | 5.761  | 8.35E-09 |
| 6 | rs28383371  | 32607154 | T | ADD | 147797 | 1.134  | 5.761  | 8.35E-09 |
| 6 | rs28383372  | 32607174 | T | ADD | 146370 | 1.148  | 6.365  | 1.95E-10 |
| 6 | rs28383373  | 32607193 | C | ADD | 146257 | 1.148  | 6.339  | 2.32E-10 |
| 6 | rs79298326  | 32607221 | G | ADD | 148035 | 0.6185 | -8.135 | 4.11E-16 |
| 6 | rs80217639  | 32607224 | T | ADD | 148035 | 0.6185 | -8.135 | 4.11E-16 |
| 6 | rs76867035  | 32607270 | G | ADD | 148470 | 0.6197 | -8.089 | 5.99E-16 |
| 6 | rs35248896  | 32607370 | T | ADD | 144433 | 1.209  | 7.353  | 1.93E-13 |
| 6 | rs63749607  | 32607406 | G | ADD | 148456 | 0.6197 | -8.103 | 5.38E-16 |
| 6 | rs28383386  | 32607567 | A | ADD | 145182 | 1.142  | 6.061  | 1.35E-09 |
| 6 | rs28383387  | 32607575 | T | ADD | 143996 | 1.154  | 6.52   | 7.04E-11 |
| 6 | rs41269944  | 32607627 | T | ADD | 146059 | 1.207  | 7.412  | 1.24E-13 |



|   |                     |          |   |     |        |        |        |          |
|---|---------------------|----------|---|-----|--------|--------|--------|----------|
| 6 | rs41269945          | 32607853 | T | ADD | 140422 | 1.233  | 7.772  | 7.74E-15 |
| 6 | rs36221399          | 32607861 | T | ADD | 148501 | 0.6185 | -8.121 | 4.61E-16 |
| 6 | 6:32607898_A<br>G_A | 32607898 | A | ADD | 147950 | 1.141  | 6.064  | 1.33E-09 |
| 6 | rs17426593          | 32608077 | C | ADD | 140882 | 1.242  | 8.167  | 3.15E-16 |
| 6 | rs28383405          | 32608108 | T | ADD | 148554 | 1.133  | 5.744  | 9.23E-09 |
| 6 | rs28383406          | 32608179 | C | ADD | 148711 | 1.134  | 5.794  | 6.86E-09 |
| 6 | rs41269955          | 32608269 | A | ADD | 133418 | 1.221  | 6.662  | 2.70E-11 |
| 6 | rs370803972         | 32608334 | G | ADD | 108797 | 0.805  | -8.823 | 1.11E-18 |
| 6 | rs36220784          | 32608350 | A | ADD | 148489 | 0.6188 | -8.113 | 4.94E-16 |
| 6 | rs34430979          | 32608425 | A | ADD | 146909 | 0.628  | -7.481 | 7.36E-14 |
| 6 | rs34141382          | 32608478 | C | ADD | 136297 | 1.235  | 7.416  | 1.20E-13 |
| 6 | rs4286817           | 32608821 | A | ADD | 130579 | 1.249  | 8.804  | 1.32E-18 |
| 6 | rs75046941          | 32608855 | G | ADD | 146841 | 0.6297 | -7.451 | 9.28E-14 |
| 6 | rs75503615          | 32608934 | T | ADD | 147776 | 0.6749 | -7.169 | 7.53E-13 |
| 6 | rs78824971          | 32608946 | A | ADD | 147737 | 0.6784 | -7.095 | 1.29E-12 |
| 6 | rs78496075          | 32608967 | G | ADD | 146770 | 0.6644 | -7.397 | 1.39E-13 |
| 6 | rs75174795          | 32608977 | G | ADD | 146988 | 0.6801 | -7.057 | 1.71E-12 |
| 6 | rs34763586          | 32608998 | C | ADD | 138735 | 1.221  | 7.272  | 3.55E-13 |
| 6 | rs28383439          | 32609042 | A | ADD | 148095 | 1.137  | 5.91   | 3.43E-09 |
| 6 | rs36219699          | 32609195 | A | ADD | 147719 | 0.6745 | -7.181 | 6.94E-13 |
| 6 | rs12722072          | 32609239 | A | ADD | 138316 | 1.219  | 7.213  | 5.49E-13 |
| 6 | rs4467816           | 32609371 | C | ADD | 146152 | 0.7808 | -9.277 | 1.75E-20 |
| 6 | rs28383455          | 32609380 | T | ADD | 146672 | 1.141  | 6.031  | 1.63E-09 |
| 6 | rs28383457          | 32609456 | T | ADD | 148382 | 1.137  | 5.883  | 4.03E-09 |
| 6 | rs35874654          | 32609479 | A | ADD | 148260 | 1.214  | 7.781  | 7.22E-15 |
| 6 | rs34965214          | 32609545 | T | ADD | 143417 | 1.223  | 7.727  | 1.10E-14 |
| 6 | rs28383460          | 32609586 | G | ADD | 148480 | 1.136  | 5.862  | 4.59E-09 |
| 6 | rs41268284          | 32609621 | G | ADD | 147415 | 1.204  | 7.383  | 1.54E-13 |
| 6 | rs9272730           | 32609634 | G | ADD | 147512 | 1.141  | 6.05   | 1.45E-09 |
| 6 | rs9272731           | 32609645 | C | ADD | 147518 | 1.141  | 6.039  | 1.56E-09 |
| 6 | rs9272736           | 32609671 | A | ADD | 143449 | 1.151  | 6.383  | 1.74E-10 |
|   |                     |          | A |     |        |        |        |          |
|   |                     |          | G |     |        |        |        |          |
|   |                     |          | A |     |        |        |        |          |
|   |                     |          | A |     |        |        |        |          |
| 6 | rs374819369         | 32609696 | G | ADD | 134225 | 1.221  | 7.9    | 2.79E-15 |
| 6 | rs9272742           | 32609722 | T | ADD | 147778 | 1.22   | 7.997  | 1.27E-15 |
| 6 | rs1048173           | 32609855 | C | ADD | 146232 | 1.136  | 5.819  | 5.91E-09 |
| 6 | rs41547417          | 32609874 | G | ADD | 147878 | 0.6733 | -7.204 | 5.84E-13 |
| 6 | rs7990              | 32609965 | A | ADD | 137500 | 1.241  | 6.971  | 3.14E-12 |

|   |                     |          |   |     |        |        |        |          |
|---|---------------------|----------|---|-----|--------|--------|--------|----------|
| 6 | rs2308890           | 32610008 | T | ADD | 147817 | 1.142  | 6.105  | 1.03E-09 |
| 6 | rs35975014          | 32610075 | G | ADD | 147255 | 0.6645 | -7.376 | 1.63E-13 |
| 6 | 6:32610099_TC<br>_T | 32610099 | T | ADD | 148350 | 1.135  | 5.8    | 6.62E-09 |
| 6 | rs75076975          | 32610134 | A | ADD | 148340 | 1.135  | 5.806  | 6.40E-09 |
| 6 | rs748519761         | 32610142 | T | ADD | 125621 | 1.167  | 6.537  | 6.29E-11 |
| 6 | rs62404092          | 32610151 | A | ADD | 147411 | 0.674  | -7.185 | 6.70E-13 |
| 6 | rs397843773         | 32610171 | T | ADD | 148341 | 1.134  | 5.788  | 7.12E-09 |
| 6 | rs79351547          | 32610196 | A | ADD | 148348 | 1.135  | 5.806  | 6.41E-09 |
| 6 | rs116022266         | 32610201 | A | ADD | 148346 | 1.135  | 5.806  | 6.40E-09 |
| 6 | rs9272774           | 32610255 | A | ADD | 148386 | 1.135  | 5.808  | 6.34E-09 |
| 6 | rs9272775           | 32610257 | C | ADD | 148277 | 1.133  | 5.76   | 8.43E-09 |
| 6 | rs78712211          | 32610300 | T | ADD | 146968 | 0.6629 | -7.397 | 1.39E-13 |
| 6 | rs77179964          | 32610313 | G | ADD | 147995 | 0.6734 | -7.2   | 6.04E-13 |
| 6 | rs9272785           | 32610401 | A | ADD | 140249 | 1.226  | 7.59   | 3.20E-14 |
| 6 | rs1048414           | 32610478 | G | ADD | 147722 | 1.137  | 5.878  | 4.14E-09 |
| 6 | rs1048419           | 32610481 | C | ADD | 147722 | 1.137  | 5.878  | 4.14E-09 |
| 6 | rs9272803           | 32610591 | T | ADD | 147490 | 1.135  | 5.78   | 7.49E-09 |
| 6 | rs36027005          | 32610643 | T | ADD | 147635 | 0.6748 | -7.165 | 7.77E-13 |
| 6 | rs35444025          | 32610688 | C | ADD | 147632 | 0.6747 | -7.166 | 7.74E-13 |
| 6 | rs62404094          | 32610696 | A | ADD | 147624 | 0.6747 | -7.166 | 7.73E-13 |
| 6 | rs7708              | 32610749 | A | ADD | 143449 | 0.7147 | -6.445 | 1.15E-10 |
| 6 | rs9272896           | 32610806 | C | ADD | 127750 | 1.157  | 5.924  | 3.14E-09 |
| 6 | rs9272899           | 32610809 | T | ADD | 125796 | 1.161  | 6.013  | 1.83E-09 |
| 6 | rs28371169          | 32610819 | G | ADD | 129960 | 1.162  | 6.23   | 4.65E-10 |
| 6 | rs9272905           | 32610836 | T | ADD | 129476 | 1.161  | 6.166  | 7.01E-10 |
| 6 | rs9272913           | 32610860 | T | ADD | 129364 | 1.16   | 6.1    | 1.06E-09 |
| 6 | rs9272914           | 32610863 | G | ADD | 129364 | 1.16   | 6.1    | 1.06E-09 |
| 6 | rs36216730          | 32611094 | T | ADD | 147860 | 0.675  | -7.166 | 7.71E-13 |
| 6 | rs62404112          | 32611122 | C | ADD | 147863 | 0.675  | -7.166 | 7.73E-13 |
| 6 | rs36216571          | 32611215 | T | ADD | 147889 | 0.6733 | -7.205 | 5.82E-13 |
| 6 | rs45512899          | 32611299 | T | ADD | 147991 | 0.6754 | -7.156 | 8.29E-13 |
| 6 | rs9273014           | 32611650 | A | ADD | 145952 | 1.136  | 5.833  | 5.45E-09 |
| 6 | rs36214506          | 32611709 | C | ADD | 148048 | 0.6732 | -7.206 | 5.75E-13 |
| 6 | rs36214159          | 32611759 | G | ADD | 148026 | 0.6731 | -7.208 | 5.67E-13 |
| 6 | rs78846394          | 32612096 | G | ADD | 148194 | 0.6716 | -7.249 | 4.19E-13 |
| 6 | rs9273063           | 32612166 | T | ADD | 117985 | 1.176  | 5.914  | 3.35E-09 |
| 6 | rs9273070           | 32612241 | T | ADD | 118489 | 1.185  | 6.224  | 4.83E-10 |
| 6 | rs9273073           | 32612279 | C | ADD | 116284 | 1.164  | 5.783  | 7.34E-09 |

|   |                |          |   |     |        |        |        |          |
|---|----------------|----------|---|-----|--------|--------|--------|----------|
| 6 | rs62404117     | 32612417 | A | ADD | 148573 | 0.6175 | -8.133 | 4.18E-16 |
| 6 | rs62404118     | 32612522 | C | ADD | 148179 | 0.6746 | -7.178 | 7.05E-13 |
| 6 | rs9273107      | 32612620 | G | ADD | 123494 | 1.285  | 6.64   | 3.13E-11 |
| 6 | rs62404119     | 32612905 | A | ADD | 148454 | 0.6188 | -8.115 | 4.84E-16 |
| 6 | rs62404120     | 32612962 | C | ADD | 148244 | 0.6729 | -7.215 | 5.38E-13 |
| 6 | rs9273148      | 32612982 | A | ADD | 128934 | 1.18   | 6.752  | 1.46E-11 |
| 6 | rs9273165      | 32613124 | G | ADD | 148424 | 0.6179 | -8.141 | 3.91E-16 |
| 6 | rs62404121     | 32613349 | A | ADD | 148324 | 0.6726 | -7.222 | 5.12E-13 |
| 6 | rs9282052      | 32613360 | A | ADD | 143447 | 1.209  | 7.294  | 3.01E-13 |
| 6 | rs184755809    | 32613600 | A | ADD | 105437 | 1.204  | 5.831  | 5.52E-09 |
| 6 | rs193292687    | 32614432 | A | ADD | 126413 | 1.25   | 6.134  | 8.57E-10 |
| 6 | rs78568738     | 32614573 | C | ADD | 148352 | 0.6735 | -7.207 | 5.72E-13 |
| 6 | rs79139281     | 32614768 | C | ADD | 148359 | 0.6753 | -7.168 | 7.62E-13 |
| 6 | rs114336758    | 32614829 | C | ADD | 129421 | 1.281  | 6.443  | 1.17E-10 |
| 6 | rs117601730    | 32614833 | G | ADD | 133803 | 1.296  | 6.741  | 1.57E-11 |
| 6 | rs62404122     | 32614857 | C | ADD | 148357 | 0.6753 | -7.17  | 7.49E-13 |
| 6 | rs78337030     | 32615310 | G | ADD | 148385 | 0.6755 | -7.163 | 7.90E-13 |
| 6 | rs561575493    | 32615452 | A | ADD | 123493 | 1.23   | 5.779  | 7.53E-09 |
| 6 | rs28479464     | 32615457 | C | ADD | 148250 | 0.8074 | -7.553 | 4.26E-14 |
| 6 | rs772081778    | 32615636 | G | ADD | 131214 | 1.276  | 7.005  | 2.46E-12 |
| 6 | rs62404123     | 32615963 | G | ADD | 148377 | 0.6753 | -7.169 | 7.58E-13 |
| 6 | rs62404124     | 32616074 | A | ADD | 138053 | 0.7018 | -6.585 | 4.54E-11 |
| 6 | rs58069912     | 32616339 | C | ADD | 135115 | 0.6884 | -7.001 | 2.54E-12 |
| 6 | rs79088780     | 32617512 | T | ADD | 100615 | 0.852  | -5.893 | 3.79E-09 |
| 6 | rs28798705     | 32617809 | G | ADD | 131028 | 0.8065 | -8.333 | 7.88E-17 |
| 6 | rs62404127     | 32618229 | A | ADD | 141429 | 0.6871 | -6.856 | 7.07E-12 |
| 6 | rs575147125    | 32619144 | G | ADD | 105531 | 1.288  | 7.159  | 8.10E-13 |
| 6 | rs28651573     | 32619218 | G | ADD | 93757  | 1.208  | 6.741  | 1.58E-11 |
| 6 | rs2858877      | 32620549 | A | ADD | 117075 | 1.231  | 6.185  | 6.20E-10 |
| 6 | rs77062257     | 32620764 | T | ADD | 109798 | 1.197  | 5.996  | 2.02E-09 |
| 6 | 6:32620828_G_A | 32620828 | A | ADD | 140704 | 1.284  | 6.346  | 2.22E-10 |
| 6 | rs75150448     | 32620831 | A | ADD | 148299 | 0.6728 | -7.227 | 4.94E-13 |
| 6 | 6:32621290_C_T | 32621290 | T | ADD | 91224  | 1.226  | 6.289  | 3.19E-10 |
| 6 | rs28590669     | 32621443 | G | ADD | 148265 | 0.6567 | -9.6   | 7.98E-22 |
| 6 | rs28704178     | 32621483 | A | ADD | 148366 | 0.6563 | -9.614 | 6.98E-22 |
| 6 | 6:32621590_T_C | 32621590 | C | ADD | 105261 | 1.186  | 6.36   | 2.02E-10 |
| 6 | rs28886951     | 32622035 | T | ADD | 148359 | 0.6561 | -9.62  | 6.57E-22 |

|   |                    |          |   |     |        |        |        |          |
|---|--------------------|----------|---|-----|--------|--------|--------|----------|
| 6 | rs35932914         | 32622150 | A | ADD | 148386 | 0.6561 | -9.619 | 6.66E-22 |
| 6 | rs28374650         | 32623367 | T | ADD | 148010 | 0.7813 | -9.394 | 5.76E-21 |
| 6 | rs9273348          | 32623487 | G | ADD | 87209  | 1.204  | 6.421  | 1.36E-10 |
| 6 | rs73732214         | 32623528 | A | ADD | 140085 | 0.7426 | -8.256 | 1.51E-16 |
| 6 | rs55986091         | 32623713 | A | ADD | 148231 | 0.656  | -9.623 | 6.42E-22 |
| 6 | rs4637681          | 32623928 | T | ADD | 111139 | 1.273  | 9.803  | 1.09E-22 |
| 6 | rs55866704         | 32624001 | T | ADD | 143760 | 0.689  | -9.028 | 1.74E-19 |
| 6 | rs185774274        | 32624515 | C | ADD | 102269 | 1.221  | 5.976  | 2.29E-09 |
| 6 | rs9501646          | 32624843 | A | ADD | 103018 | 1.295  | 7.091  | 1.33E-12 |
| 6 | 6:32624923_C_<br>A | 32624923 | A | ADD | 97109  | 1.187  | 5.801  | 6.59E-09 |
| 6 | rs4548048          | 32625022 | T | ADD | 141187 | 0.6776 | -9.145 | 5.95E-20 |
| 6 | rs4639377          | 32625283 | T | ADD | 103891 | 1.195  | 6.632  | 3.30E-11 |
| 6 | 6:32625319_A_<br>G | 32625319 | G | ADD | 98712  | 1.174  | 5.808  | 6.33E-09 |
| 6 | rs34046799         | 32625442 | A | ADD | 145124 | 0.7094 | -8.623 | 6.51E-18 |
| 6 | rs28442287         | 32626007 | T | ADD | 148709 | 0.6616 | -9.506 | 1.97E-21 |
| 6 | rs28584179         | 32626119 | T | ADD | 148783 | 0.6607 | -9.554 | 1.25E-21 |
| 6 | rs6928482          | 32626249 | C | ADD | 148783 | 1.136  | 6.047  | 1.48E-09 |
| 6 | rs28407950         | 32626348 | T | ADD | 148554 | 0.7818 | -9.392 | 5.89E-21 |
| 6 | rs112796194        | 32626392 | C | ADD | 148552 | 0.7828 | -9.35  | 8.73E-21 |
| 6 | rs34983241         | 32626397 | T | ADD | 148552 | 0.7828 | -9.35  | 8.73E-21 |
| 6 | rs34004019         | 32626403 | G | ADD | 122094 | 0.747  | -8.371 | 5.72E-17 |
| 6 | rs28515515         | 32626432 | T | ADD | 148552 | 0.7828 | -9.35  | 8.73E-21 |
| 6 | rs28414666         | 32626451 | A | ADD | 148449 | 0.7418 | -10.57 | 4.28E-26 |
| 6 | rs28672722         | 32626537 | T | ADD | 148447 | 0.7563 | -10.17 | 2.69E-24 |
| 6 | rs34386495         | 32626730 | T | ADD | 148538 | 0.8157 | -7.238 | 4.55E-13 |
| 6 | rs28718232         | 32626750 | G | ADD | 148450 | 0.7417 | -10.57 | 4.16E-26 |
| 6 | rs28731358         | 32626883 | C | ADD | 144082 | 0.7812 | -9.324 | 1.13E-20 |
| 6 | rs28414125         | 32626975 | C | ADD | 148535 | 0.7383 | -8.083 | 6.30E-16 |
| 6 | rs4713574          | 32627038 | G | ADD | 128725 | 0.7797 | -10.64 | 1.89E-26 |
| 6 | rs28579922         | 32627044 | A | ADD | 148547 | 0.6581 | -9.578 | 9.87E-22 |
| 6 | rs9273395          | 32627094 | T | ADD | 134007 | 1.158  | 6.478  | 9.28E-11 |
| 6 | 6:32627122_T_<br>C | 32627122 | C | ADD | 123342 | 1.247  | 6.013  | 1.82E-09 |
| 6 | rs4993986          | 32627652 | G | ADD | 148735 | 1.154  | 6.613  | 3.78E-11 |
| 6 | rs6689             | 32627700 | G | ADD | 148502 | 0.8398 | -6.132 | 8.70E-10 |
| 6 | rs41270875         | 32628272 | G | ADD | 139530 | 1.169  | 5.798  | 6.69E-09 |
| 6 | rs9273501          | 32628361 | A | ADD | 148756 | 1.161  | 6.881  | 5.92E-12 |
| 6 | rs9273505          | 32628420 | T | ADD | 148757 | 1.154  | 6.61   | 3.83E-11 |
| 6 | rs41270883         | 32628597 | T | ADD | 145511 | 1.168  | 5.827  | 5.65E-09 |

|   |               |          |   |     |        |        |       |          |
|---|---------------|----------|---|-----|--------|--------|-------|----------|
| 6 | rs9273608     | 32629110 | T | ADD | 134925 | 1.17   | 6.734 | 1.65E-11 |
| 6 | rs28724240    | 32629328 | A | ADD | 112442 | 1.294  | 7.196 | 6.18E-13 |
| 6 | rs28724243    | 32629347 | C | ADD | 126101 | 1.184  | 6.615 | 3.71E-11 |
| 6 | rs28724245    | 32629400 | G | ADD | 147838 | 1.152  | 6.481 | 9.14E-11 |
| 6 | rs28724249    | 32629509 | C | ADD | 148584 | 1.154  | 6.604 | 4.01E-11 |
| 6 | rs28724251    | 32629535 | A | ADD | 146367 | 1.158  | 6.673 | 2.52E-11 |
| 6 | rs1130398     | 32629764 | T | ADD | 148762 | 1.155  | 6.633 | 3.30E-11 |
| 6 | rs701564      | 32629809 | T | ADD | 148783 | 1.168  | 5.94  | 2.85E-09 |
| 6 | rs1063323     | 32629891 | T | ADD | 148683 | 1.155  | 6.641 | 3.12E-11 |
| 6 | rs1063321     | 32629955 | T | ADD | 148750 | 1.155  | 6.622 | 3.54E-11 |
| 6 | rs9274094     | 32630155 | A | ADD | 142470 | 1.156  | 6.576 | 4.83E-11 |
| 6 | rs9274129     | 32630230 | C | ADD | 129740 | 1.147  | 5.958 | 2.55E-09 |
| 6 | rs28724260    | 32630240 | G | ADD | 129741 | 1.147  | 5.958 | 2.55E-09 |
| 6 | rs9274150     | 32630276 | G | ADD | 129596 | 1.145  | 5.862 | 4.57E-09 |
| 6 | rs9274167     | 32630317 | G | ADD | 124590 | 1.154  | 6.086 | 1.16E-09 |
| 6 | 6:32630610_C_ |          |   |     |        |        |       |          |
| 6 | A             | 32630610 | A | ADD | 129751 | 1.171  | 6.913 | 4.73E-12 |
| 6 | rs9274193     | 32630684 | T | ADD | 135583 | 1.162  | 6.589 | 4.42E-11 |
| 6 | rs9274194     | 32630689 | C | ADD | 110927 | 1.195  | 5.97  | 2.37E-09 |
| 6 | rs41270925    | 32630692 | A | ADD | 125842 | 1.183  | 6.014 | 1.81E-09 |
| 6 | rs9274195     | 32630701 | T | ADD | 126447 | 1.178  | 7.059 | 1.68E-12 |
| 6 | rs9274198     | 32630720 | T | ADD | 126210 | 1.18   | 7.154 | 8.42E-13 |
| 6 | 6:32630721_A_ |          |   |     |        |        |       |          |
| 6 | G             | 32630721 | G | ADD | 126300 | 1.176  | 6.995 | 2.65E-12 |
| 6 | rs779124117   | 32630758 | A | ADD | 126938 | 1.177  | 7.053 | 1.75E-12 |
| 6 | rs9274227     | 32631142 | G | ADD | 116876 | 1.155  | 5.802 | 6.55E-09 |
| 6 | rs9274229     | 32631152 | A | ADD | 122722 | 1.149  | 5.855 | 4.78E-09 |
| 6 | 6:32631178_G_ |          |   |     |        |        |       |          |
| 6 | A             | 32631178 | A | ADD | 122871 | 1.151  | 5.943 | 2.81E-09 |
| 6 | rs9274235     | 32631207 | T | ADD | 135820 | 1.174  | 7.049 | 1.80E-12 |
| 6 | 6:32631218_T_ |          |   |     |        |        |       |          |
| 6 | G             | 32631218 | G | ADD | 135796 | 1.174  | 7.054 | 1.74E-12 |
| 6 | 6:32631273_A_ |          |   |     |        |        |       |          |
| 6 | T             | 32631273 | T | ADD | 135534 | 1.172  | 6.969 | 3.19E-12 |
| 6 | 6:32631300_A_ |          |   |     |        |        |       |          |
| 6 | G             | 32631300 | G | ADD | 143723 | 1.178  | 6.031 | 1.63E-09 |
| 6 | 6:32631428_T_ |          |   |     |        |        |       |          |
| 6 | C             | 32631428 | C | ADD | 136905 | 1.174  | 7.16  | 8.07E-13 |
| 6 | rs9274278     | 32631711 | T | ADD | 111693 | 1.171  | 6.476 | 9.45E-11 |
| 6 | rs9274286     | 32631802 | A | ADD | 115298 | 1.166  | 6.402 | 1.54E-10 |
| 6 | rs28724262    | 32631889 | C | ADD | 114654 | 1.191  | 7.002 | 2.52E-12 |
| 6 | rs28724264    | 32631937 | G | ADD | 112770 | 1.183  | 6.708 | 1.97E-11 |
| 6 | rs9274306     | 32632006 | T | ADD | 136957 | 0.8789 | -5.77 | 7.93E-09 |
| 6 | rs9274346     | 32632367 | T | ADD | 130457 | 1.173  | 7.036 | 1.98E-12 |

|   |             |          |   |     |        |        |        |          |
|---|-------------|----------|---|-----|--------|--------|--------|----------|
| 6 | rs9274349   | 32632408 | T | ADD | 138018 | 1.162  | 6.695  | 2.16E-11 |
| 6 | rs41263825  | 32632543 | A | ADD | 101020 | 1.271  | 6.681  | 2.38E-11 |
| 6 | rs1130397   | 32632587 | G | ADD | 145792 | 0.836  | -6.089 | 1.14E-09 |
| 6 | rs17412833  | 32632598 | T | ADD | 145785 | 0.8361 | -6.085 | 1.16E-09 |
| 6 | rs1130392   | 32632628 | C | ADD | 127662 | 0.868  | -5.784 | 7.28E-09 |
| 6 | rs1049082   | 32632744 | T | ADD | 111235 | 1.163  | 6.013  | 1.82E-09 |
| 6 | rs281862065 | 32632770 | G | ADD | 121094 | 0.7438 | -8.094 | 5.79E-16 |
| 6 | rs1049068   | 32632777 | T | ADD | 147328 | 0.6682 | -9.317 | 1.20E-20 |
| 6 | rs1130375   | 32632820 | G | ADD | 148783 | 1.167  | 5.899  | 3.66E-09 |
| 6 | rs9274407   | 32632832 | A | ADD | 146902 | 1.17   | 5.745  | 9.22E-09 |
| 6 | rs76141774  | 32633341 | A | ADD | 146832 | 0.6428 | -7.268 | 3.66E-13 |
| 6 | rs62404143  | 32633467 | G | ADD | 148430 | 0.6387 | -7.767 | 8.01E-15 |
| 6 | rs28746843  | 32634137 | C | ADD | 96217  | 1.205  | 5.744  | 9.26E-09 |
| 6 | rs62404144  | 32634990 | T | ADD | 148523 | 0.6386 | -7.772 | 7.73E-15 |
| 6 | rs6913173   | 32635364 | C | ADD | 139124 | 1.139  | 5.94   | 2.85E-09 |
| 6 | rs9274679   | 32636653 | C | ADD | 148524 | 1.145  | 6.399  | 1.56E-10 |
| 6 | rs9274683   | 32636780 | A | ADD | 148373 | 1.143  | 6.327  | 2.49E-10 |
| 6 | rs9274684   | 32636785 | T | ADD | 148766 | 1.143  | 6.357  | 2.06E-10 |
| 6 | rs9274685   | 32636844 | C | ADD | 148728 | 1.143  | 6.32   | 2.61E-10 |
| 6 | rs9274687   | 32636882 | T | ADD | 148754 | 1.143  | 6.357  | 2.06E-10 |
| 6 | rs9274689   | 32636930 | C | ADD | 129406 | 1.15   | 6.064  | 1.33E-09 |
| 6 | rs9274690   | 32636940 | C | ADD | 144308 | 1.147  | 6.381  | 1.76E-10 |
| 6 | rs9274691   | 32636957 | C | ADD | 134794 | 1.158  | 6.6    | 4.12E-11 |
| 6 | rs9274692   | 32636958 | A | ADD | 134794 | 1.158  | 6.6    | 4.12E-11 |
| 6 | rs17211818  | 32636963 | A | ADD | 138493 | 1.21   | 6.536  | 6.34E-11 |
| 6 | rs9274693   | 32636972 | T | ADD | 138397 | 1.155  | 6.606  | 3.94E-11 |
| 6 | rs1626993   | 32636991 | T | ADD | 148177 | 1.158  | 6.769  | 1.30E-11 |
| 6 | rs9274695   | 32636997 | T | ADD | 148158 | 1.151  | 6.395  | 1.61E-10 |
| 6 | rs9274696   | 32637007 | C | ADD | 148571 | 1.145  | 6.398  | 1.57E-10 |
| 6 | rs9274697   | 32637016 | G | ADD | 148783 | 1.141  | 6.386  | 1.71E-10 |
| 6 | rs9274698   | 32637095 | C | ADD | 148711 | 1.143  | 6.355  | 2.08E-10 |
| 6 | rs17211868  | 32637135 | G | ADD | 145798 | 1.17   | 5.853  | 4.82E-09 |
| 6 | rs17205521  | 32637138 | A | ADD | 147149 | 1.177  | 6.161  | 7.24E-10 |
| 6 | rs9274702   | 32637184 | A | ADD | 144993 | 1.14   | 6.146  | 7.95E-10 |
| 6 | rs9274705   | 32637245 | A | ADD | 144649 | 1.144  | 6.309  | 2.80E-10 |
| 6 | rs9274707   | 32637266 | G | ADD | 144646 | 1.144  | 6.314  | 2.72E-10 |
| 6 | rs9274708   | 32637267 | A | ADD | 144646 | 1.144  | 6.314  | 2.72E-10 |
| 6 | rs9274710   | 32637287 | G | ADD | 144932 | 1.145  | 6.348  | 2.19E-10 |

|   |            |          |   |     |        |        |        |          |
|---|------------|----------|---|-----|--------|--------|--------|----------|
| 6 | rs17211951 | 32637315 | A | ADD | 142278 | 1.176  | 5.779  | 7.53E-09 |
| 6 | rs17211958 | 32637316 | G | ADD | 142132 | 1.175  | 5.8    | 6.65E-09 |
| 6 | rs17205605 | 32637327 | T | ADD | 143469 | 1.183  | 6.127  | 8.98E-10 |
| 6 | rs17205612 | 32637333 | T | ADD | 143372 | 1.179  | 6.095  | 1.09E-09 |
| 6 | rs9274713  | 32637341 | T | ADD | 144396 | 1.148  | 6.444  | 1.16E-10 |
| 6 | rs17211965 | 32637355 | G | ADD | 143377 | 1.179  | 6.089  | 1.13E-09 |
| 6 | rs9274715  | 32637391 | A | ADD | 134083 | 1.171  | 7.129  | 1.01E-12 |
| 6 | rs17211993 | 32637394 | G | ADD | 143744 | 1.18   | 6.144  | 8.03E-10 |
| 6 | rs9274717  | 32637454 | A | ADD | 131338 | 1.158  | 6.479  | 9.26E-11 |
| 6 | rs9274718  | 32637469 | C | ADD | 121168 | 1.161  | 6.194  | 5.87E-10 |
| 6 | rs9274719  | 32637470 | C | ADD | 142507 | 1.137  | 5.933  | 2.98E-09 |
| 6 | rs9274720  | 32637479 | A | ADD | 142536 | 1.137  | 5.924  | 3.15E-09 |
| 6 | rs3997832  | 32637497 | C | ADD | 142035 | 1.15   | 6.376  | 1.81E-10 |
| 6 | rs28746878 | 32637515 | C | ADD | 134513 | 1.259  | 5.885  | 3.97E-09 |
| 6 | rs9274725  | 32637573 | T | ADD | 148617 | 1.137  | 6.085  | 1.17E-09 |
| 6 | rs9274726  | 32637593 | G | ADD | 148695 | 1.144  | 6.365  | 1.95E-10 |
| 6 | rs34400217 | 32637750 | T | ADD | 145649 | 1.169  | 5.902  | 3.59E-09 |
| 6 | rs35744187 | 32637756 | A | ADD | 146832 | 1.166  | 5.931  | 3.01E-09 |
| 6 | rs9274730  | 32637817 | A | ADD | 131213 | 1.168  | 6.887  | 5.70E-12 |
| 6 | rs35135261 | 32637822 | T | ADD | 140798 | 1.176  | 5.803  | 6.52E-09 |
| 6 | rs9274731  | 32637823 | G | ADD | 131059 | 1.167  | 6.852  | 7.28E-12 |
| 6 | rs9274733  | 32637874 | T | ADD | 148039 | 1.145  | 6.417  | 1.39E-10 |
| 6 | rs9274736  | 32637905 | C | ADD | 139555 | 1.149  | 6.35   | 2.15E-10 |
| 6 | rs9274738  | 32637909 | C | ADD | 139555 | 1.149  | 6.35   | 2.15E-10 |
| 6 | rs35402595 | 32637912 | C | ADD | 147597 | 1.173  | 6.069  | 1.29E-09 |
| 6 | rs9274740  | 32637968 | T | ADD | 147248 | 1.148  | 6.514  | 7.31E-11 |
| 6 | rs9274741  | 32637994 | T | ADD | 148760 | 0.8696 | -6.615 | 3.70E-11 |
| 6 | rs9274743  | 32638042 | G | ADD | 147231 | 1.148  | 6.501  | 7.99E-11 |
| 6 | rs9274744  | 32638054 | A | ADD | 146622 | 1.145  | 6.379  | 1.78E-10 |
| 6 | rs9274745  | 32638058 | C | ADD | 146693 | 0.8677 | -6.661 | 2.72E-11 |
| 6 | rs9274746  | 32638060 | A | ADD | 146622 | 1.145  | 6.379  | 1.78E-10 |
| 6 | rs9274748  | 32638086 | A | ADD | 138473 | 1.149  | 6.342  | 2.27E-10 |
| 6 | rs9274749  | 32638094 | A | ADD | 138469 | 1.149  | 6.34   | 2.30E-10 |
| 6 | rs9274751  | 32638138 | C | ADD | 138540 | 1.155  | 6.606  | 3.95E-11 |
| 6 | rs9274752  | 32638163 | A | ADD | 138578 | 1.155  | 6.59   | 4.41E-11 |
| 6 | rs9274753  | 32638176 | T | ADD | 138581 | 1.155  | 6.589  | 4.43E-11 |
| 6 | rs9274754  | 32638261 | C | ADD | 139214 | 1.152  | 6.476  | 9.43E-11 |
| 6 | rs9274755  | 32638262 | A | ADD | 139214 | 1.152  | 6.476  | 9.43E-11 |

|   |             |          |   |     |        |       |       |          |
|---|-------------|----------|---|-----|--------|-------|-------|----------|
| 6 | rs9274756   | 32638269 | T | ADD | 139214 | 1.152 | 6.476 | 9.43E-11 |
| 6 | rs9274758   | 32638290 | G | ADD | 139320 | 1.153 | 6.509 | 7.58E-11 |
| 6 | rs9274759   | 32638315 | A | ADD | 148722 | 1.142 | 6.283 | 3.32E-10 |
| 6 | rs9274760   | 32638348 | G | ADD | 139310 | 1.152 | 6.502 | 7.93E-11 |
| 6 | rs9274763   | 32638427 | T | ADD | 139317 | 1.152 | 6.501 | 7.99E-11 |
| 6 | rs9274764   | 32638490 | G | ADD | 148766 | 1.142 | 6.294 | 3.10E-10 |
| 6 | rs9274769   | 32638547 | C | ADD | 139255 | 1.153 | 6.526 | 6.74E-11 |
| 6 | rs9274771   | 32638581 | C | ADD | 138370 | 1.151 | 6.434 | 1.24E-10 |
| 6 | rs9274772   | 32638583 | C | ADD | 138370 | 1.151 | 6.434 | 1.24E-10 |
| 6 | rs9274773   | 32638620 | G | ADD | 138372 | 1.152 | 6.444 | 1.16E-10 |
| 6 | rs9274774   | 32638630 | G | ADD | 138372 | 1.152 | 6.444 | 1.16E-10 |
| 6 | rs9274778   | 32638694 | A | ADD | 136950 | 1.152 | 6.431 | 1.27E-10 |
| 6 | rs9274790   | 32639155 | G | ADD | 138020 | 1.154 | 6.528 | 6.66E-11 |
| 6 | rs9274792   | 32639224 | C | ADD | 138411 | 1.152 | 6.458 | 1.06E-10 |
| 6 | rs9274794   | 32639264 | G | ADD | 137667 | 1.148 | 6.274 | 3.53E-10 |
| 6 | rs112453089 | 32639270 | G | ADD | 137668 | 1.148 | 6.272 | 3.56E-10 |
| 6 | rs6914573   | 32639368 | T | ADD | 139136 | 1.152 | 6.482 | 9.05E-11 |
| 6 | rs111983899 | 32639389 | T | ADD | 128959 | 1.147 | 5.961 | 2.51E-09 |
| 6 | rs113374318 | 32639415 | A | ADD | 129365 | 1.146 | 5.939 | 2.86E-09 |
| 6 | rs9274805   | 32639429 | T | ADD | 130828 | 1.149 | 6.125 | 9.05E-10 |
| 6 | rs9274806   | 32639441 | G | ADD | 130835 | 1.149 | 6.121 | 9.28E-10 |
| 6 | rs199884023 | 32639449 | A | ADD | 130849 | 1.149 | 6.128 | 8.92E-10 |
| 6 | rs1794493   | 32639578 | G | ADD | 136648 | 1.138 | 5.853 | 4.81E-09 |
| 6 | rs9274824   | 32639702 | T | ADD | 123772 | 1.173 | 6.827 | 8.64E-12 |
| 6 | rs9274828   | 32639737 | G | ADD | 133597 | 1.146 | 6.073 | 1.26E-09 |
| 6 | rs9274834   | 32639895 | G | ADD | 128488 | 1.169 | 6.868 | 6.50E-12 |
| 6 | rs41316211  | 32639909 | C | ADD | 136159 | 1.202 | 6.125 | 9.08E-10 |
| 6 | rs9274836   | 32639956 | A | ADD | 128497 | 1.169 | 6.867 | 6.55E-12 |
| 6 | rs9274839   | 32640015 | G | ADD | 138423 | 1.15  | 6.395 | 1.61E-10 |
| 6 | rs9274843   | 32640096 | G | ADD | 136966 | 1.148 | 6.245 | 4.25E-10 |
| 6 | rs9274853   | 32640420 | A | ADD | 138424 | 1.15  | 6.398 | 1.58E-10 |
| 6 | rs9274855   | 32640494 | A | ADD | 127122 | 1.172 | 6.95  | 3.64E-12 |
| 6 | rs9274857   | 32640542 | G | ADD | 124055 | 1.176 | 6.999 | 2.57E-12 |
| 6 | rs9274861   | 32640592 | G | ADD | 134475 | 1.152 | 6.376 | 1.82E-10 |
| 6 | rs9274864   | 32640646 | G | ADD | 136496 | 1.152 | 6.423 | 1.34E-10 |
| 6 | rs9274865   | 32640671 | T | ADD | 136493 | 1.152 | 6.425 | 1.32E-10 |
| 6 | rs9274867   | 32640745 | A | ADD | 127858 | 1.15  | 6.059 | 1.37E-09 |
| 6 | rs9274869   | 32640759 | T | ADD | 127629 | 1.149 | 6.018 | 1.76E-09 |



|   |             |          |   |     |        |        |        |          |
|---|-------------|----------|---|-----|--------|--------|--------|----------|
| 6 | rs9274871   | 32640792 | G | ADD | 119184 | 1.185  | 7.099  | 1.26E-12 |
| 6 | rs9274872   | 32640793 | G | ADD | 119184 | 1.185  | 7.099  | 1.26E-12 |
| 6 | rs62404145  | 32641178 | T | ADD | 148463 | 0.6345 | -7.858 | 3.90E-15 |
| 6 | rs9274943   | 32641784 | T | ADD | 101880 | 1.172  | 5.817  | 5.99E-09 |
| 6 | rs9274944   | 32641786 | A | ADD | 101880 | 1.172  | 5.817  | 5.99E-09 |
| 6 | rs9274954   | 32641878 | T | ADD | 120380 | 1.159  | 6.136  | 8.49E-10 |
| 6 | rs9274955   | 32641890 | G | ADD | 120733 | 1.164  | 6.339  | 2.32E-10 |
| 6 | rs9274957   | 32641914 | C | ADD | 121232 | 1.165  | 6.393  | 1.62E-10 |
| 6 | rs9274962   | 32641936 | A | ADD | 124067 | 1.161  | 6.339  | 2.31E-10 |
| 6 | rs9274967   | 32642030 | C | ADD | 126292 | 1.166  | 6.698  | 2.12E-11 |
| 6 | rs9274969   | 32642073 | T | ADD | 117298 | 1.165  | 6.313  | 2.74E-10 |
| 6 | rs9274973   | 32642147 | G | ADD | 131750 | 1.158  | 6.546  | 5.90E-11 |
| 6 | rs9274974   | 32642152 | T | ADD | 131756 | 1.158  | 6.55   | 5.76E-11 |
| 6 | rs9274977   | 32642247 | G | ADD | 126330 | 1.162  | 6.531  | 6.55E-11 |
| 6 | rs9274978   | 32642277 | C | ADD | 125883 | 1.157  | 6.321  | 2.60E-10 |
| 6 | rs9274980   | 32642290 | T | ADD | 125932 | 1.158  | 6.36   | 2.02E-10 |
| 6 | rs9274986   | 32642386 | A | ADD | 130459 | 1.164  | 6.715  | 1.89E-11 |
| 6 | rs9274987   | 32642405 | T | ADD | 129793 | 1.161  | 6.587  | 4.49E-11 |
| 6 | rs9274988   | 32642406 | T | ADD | 129793 | 1.161  | 6.587  | 4.49E-11 |
| 6 | rs9280073   | 32642469 | T | ADD | 114975 | 1.16   | 5.982  | 2.21E-09 |
| 6 | rs9274995   | 32642615 | T | ADD | 143684 | 1.132  | 5.795  | 6.85E-09 |
| 6 | rs9274996   | 32642641 | T | ADD | 144085 | 1.134  | 5.844  | 5.08E-09 |
| 6 | rs9274997   | 32642673 | T | ADD | 142945 | 1.141  | 6.124  | 9.14E-10 |
| 6 | rs62404146  | 32642679 | C | ADD | 148406 | 0.6384 | -7.752 | 9.05E-15 |
| 6 | rs9274999   | 32642709 | A | ADD | 132746 | 1.162  | 6.722  | 1.80E-11 |
| 6 | rs9275001   | 32642738 | T | ADD | 130876 | 1.161  | 6.635  | 3.24E-11 |
| 6 | rs9275007   | 32642921 | A | ADD | 141404 | 1.141  | 6.093  | 1.11E-09 |
| 6 | rs9275008   | 32642944 | C | ADD | 141127 | 1.141  | 6.062  | 1.35E-09 |
| 6 | rs9275010   | 32642966 | T | ADD | 131140 | 1.156  | 6.444  | 1.16E-10 |
| 6 | rs9275011   | 32642969 | T | ADD | 131130 | 1.157  | 6.452  | 1.11E-10 |
| 6 | rs9275013   | 32643011 | C | ADD | 133698 | 1.158  | 6.577  | 4.79E-11 |
| 6 | rs9275014   | 32643023 | A | ADD | 133697 | 1.158  | 6.577  | 4.79E-11 |
| 6 | rs28755304  | 32646193 | T | ADD | 114182 | 1.18   | 6.352  | 2.12E-10 |
| 6 | rs114708995 | 32646969 | T | ADD | 104440 | 1.228  | 6.153  | 7.62E-10 |
| 6 | rs28371245  | 32647982 | C | ADD | 118241 | 1.164  | 6.273  | 3.54E-10 |
| 6 | rs28371246  | 32647995 | C | ADD | 116861 | 1.164  | 6.192  | 5.94E-10 |
| 6 | rs9275043   | 32648061 | C | ADD | 121295 | 1.182  | 7.015  | 2.30E-12 |
| 6 | rs9275046   | 32648080 | C | ADD | 121338 | 1.181  | 6.974  | 3.09E-12 |

|   |             |          |   |     |        |       |       |          |
|---|-------------|----------|---|-----|--------|-------|-------|----------|
| 6 | rs9275047   | 32648084 | G | ADD | 121338 | 1.181 | 6.974 | 3.09E-12 |
| 6 | rs9275054   | 32648208 | G | ADD | 130197 | 1.159 | 6.5   | 8.04E-11 |
| 6 | rs9275055   | 32648220 | C | ADD | 130196 | 1.159 | 6.502 | 7.95E-11 |
| 6 | rs9275057   | 32648253 | G | ADD | 133820 | 1.156 | 6.492 | 8.49E-11 |
| 6 | rs9275059   | 32648298 | A | ADD | 134133 | 1.159 | 6.635 | 3.24E-11 |
| 6 | rs9275062   | 32648337 | C | ADD | 136220 | 1.155 | 6.527 | 6.70E-11 |
| 6 | rs9275069   | 32648437 | G | ADD | 144720 | 1.14  | 6.125 | 9.09E-10 |
| 6 | rs9275070   | 32648449 | T | ADD | 144718 | 1.14  | 6.125 | 9.08E-10 |
| 6 | rs9275071   | 32648490 | A | ADD | 134788 | 1.142 | 5.914 | 3.34E-09 |
| 6 | rs9275073   | 32648513 | G | ADD | 145630 | 1.138 | 6.04  | 1.54E-09 |
| 6 | rs9275078   | 32648592 | C | ADD | 147480 | 1.137 | 6.051 | 1.44E-09 |
| 6 | rs9275081   | 32648669 | T | ADD | 147301 | 1.139 | 6.113 | 9.76E-10 |
| 6 | rs9275082   | 32648684 | C | ADD | 147522 | 1.142 | 6.245 | 4.23E-10 |
| 6 | rs114394994 | 32648685 | T | ADD | 139610 | 1.259 | 5.878 | 4.14E-09 |
| 6 | rs9275084   | 32648722 | G | ADD | 147121 | 1.138 | 6.092 | 1.12E-09 |
| 6 | rs9275085   | 32648735 | A | ADD | 147121 | 1.138 | 6.092 | 1.12E-09 |
| 6 | rs9275086   | 32648809 | G | ADD | 148761 | 1.143 | 6.314 | 2.71E-10 |
| 6 | rs9275087   | 32648893 | C | ADD | 148761 | 1.143 | 6.314 | 2.71E-10 |
| 6 | rs9275088   | 32648931 | A | ADD | 148320 | 1.145 | 6.39  | 1.66E-10 |
| 6 | rs9275089   | 32648947 | T | ADD | 147171 | 1.137 | 6.038 | 1.56E-09 |
| 6 | rs545072519 | 32648948 | C | ADD | 143519 | 1.264 | 5.942 | 2.81E-09 |
| 6 | rs9275091   | 32648972 | T | ADD | 147178 | 1.137 | 6.039 | 1.55E-09 |
| 6 | rs9275101   | 32649355 | A | ADD | 148745 | 1.141 | 6.265 | 3.73E-10 |
| 6 | rs9275102   | 32649361 | A | ADD | 148745 | 1.141 | 6.265 | 3.73E-10 |
| 6 | rs9275103   | 32649386 | C | ADD | 148742 | 1.141 | 6.267 | 3.69E-10 |
| 6 | rs9275105   | 32649416 | T | ADD | 148742 | 1.141 | 6.267 | 3.69E-10 |
| 6 | rs9275106   | 32649475 | C | ADD | 147426 | 1.143 | 6.301 | 2.96E-10 |
| 6 | rs9275112   | 32649773 | A | ADD | 148762 | 1.142 | 6.314 | 2.73E-10 |
| 6 | rs9275114   | 32649897 | A | ADD | 148749 | 1.141 | 6.246 | 4.22E-10 |
| 6 | rs9275116   | 32649952 | C | ADD | 148748 | 1.141 | 6.245 | 4.24E-10 |
| 6 | rs9275118   | 32649996 | G | ADD | 147579 | 1.14  | 6.179 | 6.45E-10 |
| 6 | rs9275119   | 32650031 | A | ADD | 148712 | 1.141 | 6.249 | 4.12E-10 |
| 6 | rs9275123   | 32650256 | T | ADD | 148755 | 1.142 | 6.278 | 3.44E-10 |
| 6 | rs9275125   | 32650293 | T | ADD | 148755 | 1.142 | 6.278 | 3.44E-10 |
| 6 | rs9275126   | 32650307 | T | ADD | 146948 | 1.146 | 6.439 | 1.21E-10 |
| 6 | rs9275130   | 32650409 | C | ADD | 148755 | 1.141 | 6.265 | 3.74E-10 |
| 6 | rs9275131   | 32650467 | T | ADD | 148757 | 1.142 | 6.296 | 3.05E-10 |
| 6 | rs9275133   | 32650588 | G | ADD | 148766 | 1.141 | 6.257 | 3.92E-10 |

|   |             |          |   |     |        |        |        |          |
|---|-------------|----------|---|-----|--------|--------|--------|----------|
| 6 | rs9275135   | 32650736 | C | ADD | 148615 | 1.142  | 6.281  | 3.35E-10 |
| 6 | rs9275136   | 32650757 | T | ADD | 147817 | 1.144  | 6.357  | 2.06E-10 |
| 6 | rs9275138   | 32650958 | G | ADD | 148589 | 1.142  | 6.302  | 2.94E-10 |
| 6 | rs9275139   | 32651005 | A | ADD | 147502 | 1.145  | 6.41   | 1.45E-10 |
| 6 | rs9275141   | 32651117 | G | ADD | 135768 | 1.152  | 6.384  | 1.73E-10 |
| 6 | rs9275143   | 32651192 | T | ADD | 145629 | 1.143  | 6.259  | 3.88E-10 |
| 6 | rs9275145   | 32651363 | T | ADD | 148763 | 1.141  | 6.258  | 3.90E-10 |
| 6 | rs9275146   | 32651495 | T | ADD | 148275 | 1.14   | 6.187  | 6.12E-10 |
| 6 | rs9275148   | 32651585 | C | ADD | 147408 | 1.145  | 6.397  | 1.59E-10 |
| 6 | rs2856695   | 32651894 | G | ADD | 148027 | 1.138  | 6.096  | 1.09E-09 |
| 6 | rs3021058   | 32652359 | C | ADD | 139579 | 1.147  | 6.283  | 3.33E-10 |
| 6 | rs3021057   | 32652363 | T | ADD | 145543 | 1.144  | 6.306  | 2.87E-10 |
| 6 | rs9275154   | 32652435 | T | ADD | 148182 | 1.142  | 6.274  | 3.51E-10 |
| 6 | rs9275160   | 32652620 | A | ADD | 148331 | 1.141  | 6.024  | 1.71E-09 |
| 6 | rs9275162   | 32652687 | C | ADD | 148720 | 1.143  | 6.33   | 2.45E-10 |
| 6 | rs2856693   | 32653283 | T | ADD | 148776 | 1.143  | 6.317  | 2.67E-10 |
| 6 | rs9275168   | 32653676 | T | ADD | 148090 | 0.8687 | -6.645 | 3.04E-11 |
| 6 | rs9275169   | 32653721 | T | ADD | 148685 | 0.8693 | -6.632 | 3.32E-11 |
| 6 | rs9275170   | 32653726 | G | ADD | 148592 | 0.869  | -6.645 | 3.03E-11 |
| 6 | rs9275172   | 32653997 | A | ADD | 148764 | 0.8693 | -6.63  | 3.36E-11 |
| 6 | rs9275173   | 32654037 | T | ADD | 148755 | 0.8693 | -6.633 | 3.29E-11 |
| 6 | rs9275177   | 32654174 | T | ADD | 146960 | 1.153  | 6.685  | 2.30E-11 |
| 6 | rs9275178   | 32654181 | A | ADD | 146952 | 1.153  | 6.685  | 2.30E-11 |
| 6 | rs113457465 | 32654241 | C | ADD | 141551 | 1.274  | 6.139  | 8.33E-10 |
| 6 | rs9275180   | 32654278 | T | ADD | 147552 | 1.147  | 6.474  | 9.53E-11 |
| 6 | rs2856690   | 32654536 | A | ADD | 145415 | 1.14   | 6.12   | 9.34E-10 |
| 6 | rs2856689   | 32654551 | G | ADD | 145460 | 1.14   | 6.122  | 9.22E-10 |
| 6 | rs2856686   | 32654869 | C | ADD | 148075 | 1.144  | 6.35   | 2.16E-10 |
| 6 | rs2856685   | 32655072 | T | ADD | 147842 | 1.142  | 6.285  | 3.29E-10 |
| 6 | rs2856684   | 32655095 | C | ADD | 147842 | 1.142  | 6.285  | 3.29E-10 |
| 6 | rs2856679   | 32655615 | A | ADD | 145235 | 1.137  | 5.993  | 2.07E-09 |
| 6 | rs9275187   | 32656038 | C | ADD | 122844 | 1.164  | 6.456  | 1.07E-10 |
| 6 | rs9275188   | 32656136 | T | ADD | 137207 | 1.148  | 6.272  | 3.57E-10 |
| 6 | rs9275189   | 32656137 | G | ADD | 137207 | 1.148  | 6.272  | 3.57E-10 |
| 6 | rs9275199   | 32656680 | T | ADD | 145950 | 1.146  | 6.407  | 1.48E-10 |
| 6 | rs2856676   | 32656833 | A | ADD | 148625 | 1.141  | 6.234  | 4.56E-10 |
| 6 | rs9275202   | 32656869 | G | ADD | 148107 | 1.145  | 6.386  | 1.70E-10 |
| 6 | rs2647000   | 32656890 | C | ADD | 148110 | 1.144  | 6.383  | 1.73E-10 |

|   |            |          |   |     |        |        |        |          |
|---|------------|----------|---|-----|--------|--------|--------|----------|
| 6 | rs4642516  | 32657543 | T | ADD | 148783 | 1.142  | 6.286  | 3.26E-10 |
| 6 | rs7754464  | 32657818 | G | ADD | 148730 | 1.142  | 6.275  | 3.50E-10 |
| 6 | rs7754885  | 32657858 | A | ADD | 148646 | 1.14   | 6.209  | 5.34E-10 |
| 6 | rs2858330  | 32658715 | C | ADD | 148532 | 1.141  | 6.247  | 4.18E-10 |
| 6 | rs9275216  | 32658748 | T | ADD | 148321 | 1.137  | 5.846  | 5.04E-09 |
| 6 | rs2858329  | 32658801 | G | ADD | 148172 | 1.14   | 6.193  | 5.89E-10 |
| 6 | rs9275218  | 32658933 | G | ADD | 148043 | 1.14   | 5.939  | 2.87E-09 |
| 6 | rs62404159 | 32661150 | G | ADD | 145652 | 0.6263 | -7.287 | 3.18E-13 |
| 6 | rs9275272  | 32662546 | C | ADD | 148039 | 1.151  | 6.479  | 9.25E-11 |
| 6 | rs9275273  | 32662559 | A | ADD | 148368 | 1.15   | 6.446  | 1.15E-10 |
| 6 | rs9275274  | 32662566 | C | ADD | 148196 | 1.149  | 6.405  | 1.50E-10 |
| 6 | rs9275289  | 32663208 | C | ADD | 138900 | 1.156  | 6.294  | 3.10E-10 |
| 6 | rs9275291  | 32663260 | A | ADD | 138466 | 1.153  | 6.146  | 7.94E-10 |
| 6 | rs9275297  | 32663446 | A | ADD | 148433 | 1.152  | 6.502  | 7.94E-11 |
| 6 | rs5000634  | 32663564 | G | ADD | 148759 | 1.15   | 6.437  | 1.22E-10 |
| 6 | rs6457619  | 32663986 | G | ADD | 148773 | 1.15   | 6.438  | 1.21E-10 |
| 6 | rs6457622  | 32664163 | C | ADD | 148777 | 1.15   | 6.436  | 1.23E-10 |
| 6 | rs7745040  | 32664332 | C | ADD | 148783 | 1.15   | 6.432  | 1.26E-10 |
| 6 | rs2894380  | 32664675 | G | ADD | 148757 | 1.149  | 6.417  | 1.39E-10 |
| 6 | rs2856667  | 32665079 | C | ADD | 148667 | 1.142  | 6.274  | 3.52E-10 |
| 6 | rs62406889 | 32672214 | T | ADD | 147694 | 0.6342 | -7.737 | 1.02E-14 |
| 6 | rs17219281 | 32675645 | A | ADD | 148683 | 1.208  | 5.757  | 8.55E-09 |
| 6 | rs7764819  | 32680576 | G | ADD | 148783 | 1.213  | 6.345  | 2.22E-10 |
| 6 | rs7765379  | 32680928 | G | ADD | 148783 | 1.212  | 6.327  | 2.50E-10 |
| 6 | rs17212937 | 32681339 | T | ADD | 148783 | 1.211  | 6.297  | 3.03E-10 |
| 6 | rs3873444  | 32682724 | T | ADD | 148783 | 0.7491 | -7.076 | 1.49E-12 |
| 6 | rs9275652  | 32685822 | C | ADD | 148783 | 0.851  | -6.074 | 1.25E-09 |
| 6 | rs9275655  | 32685918 | G | ADD | 148691 | 0.8493 | -6.141 | 8.21E-10 |
| 6 | rs9275657  | 32685967 | A | ADD | 148706 | 0.849  | -6.152 | 7.65E-10 |
| 6 | rs9275659  | 32686103 | A | ADD | 148783 | 0.8488 | -6.162 | 7.19E-10 |
| 6 | rs9275660  | 32686196 | A | ADD | 148783 | 0.8506 | -6.089 | 1.14E-09 |
| 6 | rs9275661  | 32686248 | C | ADD | 148783 | 0.8488 | -6.162 | 7.19E-10 |
| 6 | rs9275663  | 32686380 | G | ADD | 148783 | 0.8488 | -6.162 | 7.19E-10 |
| 6 | rs9275666  | 32686627 | T | ADD | 148629 | 0.8473 | -6.22  | 4.96E-10 |
| 6 | rs9275669  | 32686676 | A | ADD | 148628 | 0.8473 | -6.22  | 4.96E-10 |
| 6 | rs9275674  | 32686806 | T | ADD | 148775 | 0.8485 | -6.175 | 6.62E-10 |
| 6 | rs9275680  | 32687218 | T | ADD | 148491 | 0.8412 | -6.571 | 5.00E-11 |
| 6 | rs9275682  | 32687297 | G | ADD | 148775 | 0.8485 | -6.174 | 6.65E-10 |

|   |             |          |   |     |        |        |        |          |
|---|-------------|----------|---|-----|--------|--------|--------|----------|
| 6 | rs9275686   | 32687570 | A | ADD | 148783 | 0.8501 | -6.087 | 1.15E-09 |
| 6 | rs150845531 | 32687609 | A | T   | 148779 | 0.8483 | -6.182 | 6.33E-10 |
| 6 | rs9275690   | 32687720 | A | ADD | 148783 | 0.8483 | -6.182 | 6.31E-10 |
| 6 | rs9275696   | 32687904 | G | ADD | 148782 | 0.8483 | -6.183 | 6.30E-10 |
| 6 | rs9275699   | 32688021 | G | ADD | 148772 | 0.848  | -6.197 | 5.77E-10 |
| 6 | rs9275702   | 32688100 | T | ADD | 148702 | 0.8472 | -6.227 | 4.75E-10 |
| 6 | rs9275711   | 32688228 | C | ADD | 148046 | 0.8492 | -6.144 | 8.05E-10 |
| 6 | rs9275723   | 32688483 | A | ADD | 148782 | 0.8483 | -6.183 | 6.30E-10 |
| 6 | rs9275728   | 32688638 | C | ADD | 148781 | 0.8483 | -6.183 | 6.29E-10 |
| 6 | rs9275731   | 32688752 | T | ADD | 148590 | 0.8464 | -6.252 | 4.06E-10 |
| 6 | rs9275735   | 32688787 | A | ADD | 148779 | 0.8483 | -6.183 | 6.29E-10 |
| 6 | rs9275740   | 32688859 | C | ADD | 148563 | 0.8489 | -6.15  | 7.76E-10 |
| 6 | rs9275741   | 32688872 | A | ADD | 148326 | 0.8487 | -6.142 | 8.17E-10 |
| 6 | rs9275764   | 32689289 | T | ADD | 148781 | 0.8483 | -6.183 | 6.29E-10 |
| 6 | rs9275769   | 32689431 | C | ADD | 148090 | 0.8466 | -6.215 | 5.14E-10 |
| 6 | rs9275770   | 32689432 | A | ADD | 148700 | 0.8482 | -6.185 | 6.20E-10 |
| 6 | rs201794780 | 32689730 | T | ADD | 119522 | 1.152  | 5.905  | 3.52E-09 |
| 6 | rs9275791   | 32689938 | A | ADD | 147440 | 0.8489 | -6.085 | 1.16E-09 |
| 6 | rs9275792   | 32689946 | A | ADD | 148724 | 0.8481 | -6.187 | 6.11E-10 |
| 6 | rs9275796   | 32690078 | C | ADD | 148737 | 0.8485 | -6.175 | 6.63E-10 |
| 6 | rs9275806   | 32690320 | C | ADD | 148075 | 0.8452 | -6.28  | 3.39E-10 |
| 6 | rs9275807   | 32690332 | T | ADD | 147990 | 0.8454 | -6.27  | 3.62E-10 |
| 6 | rs9275829   | 32690784 | C | ADD | 147339 | 0.8546 | -5.856 | 4.75E-09 |
| 6 | rs9275848   | 32691173 | T | ADD | 148159 | 0.8502 | -6.093 | 1.11E-09 |
| 6 | rs9275858   | 32691345 | G | ADD | 148336 | 0.8488 | -6.158 | 7.35E-10 |
| 6 | rs763026    | 32691745 | T | ADD | 148770 | 0.8481 | -6.19  | 6.01E-10 |
| 6 | rs763025    | 32691937 | G | ADD | 148770 | 0.8481 | -6.19  | 6.01E-10 |
| 6 | rs9275899   | 32692094 | A | ADD | 148702 | 0.848  | -6.192 | 5.94E-10 |
| 6 | rs9275911   | 32692391 | G | ADD | 148704 | 0.848  | -6.194 | 5.88E-10 |
| 6 | rs9275936   | 32692933 | A | ADD | 148783 | 0.8519 | -6.031 | 1.63E-09 |
| 6 | rs9275945   | 32693085 | G | ADD | 148469 | 0.8471 | -6.214 | 5.15E-10 |
| 6 | rs9275957   | 32693294 | A | ADD | 147846 | 0.8531 | -5.93  | 3.03E-09 |
| 6 | rs9275965   | 32693482 | A | ADD | 148777 | 0.8484 | -6.178 | 6.49E-10 |
| 6 | rs9275970   | 32693615 | C | ADD | 147949 | 0.852  | -5.97  | 2.37E-09 |
| 6 | rs9275986   | 32694068 | G | ADD | 148778 | 0.8485 | -6.176 | 6.58E-10 |
| 6 | rs9275988   | 32694169 | A | ADD | 147641 | 0.8564 | -5.795 | 6.81E-09 |
| 6 | rs9275989   | 32694211 | A | ADD | 148072 | 0.8458 | -6.252 | 4.04E-10 |
| 6 | rs9275996   | 32694401 | C | ADD | 148617 | 0.8459 | -6.28  | 3.39E-10 |

|   |                                          |          |        |     |        |        |        |          |
|---|------------------------------------------|----------|--------|-----|--------|--------|--------|----------|
| 6 | 6:32694936_CT<br>AAT_C                   | 32694936 | C      | ADD | 148306 | 0.8493 | -6.129 | 8.82E-10 |
| 6 | rs9276021                                | 32695212 | C      | ADD | 148776 | 0.8485 | -6.177 | 6.54E-10 |
| 6 | rs9276039                                | 32695505 | T      | ADD | 148776 | 0.8484 | -6.178 | 6.49E-10 |
| 6 | rs9276054                                | 32695798 | C      | ADD | 148215 | 0.845  | -6.291 | 3.16E-10 |
| 6 | rs9276055                                | 32695818 | T      | ADD | 148287 | 0.8458 | -6.264 | 3.75E-10 |
| 6 | rs9276074                                | 32696443 | A      | ADD | 148770 | 0.8484 | -6.178 | 6.48E-10 |
| 6 | rs9276075                                | 32696543 | A      | ADD | 144729 | 0.848  | -5.949 | 2.69E-09 |
| 6 | 6:32696963_CT<br>rs9276098<br>_C         | 32696894 | G      | ADD | 148771 | 0.8484 | -6.178 | 6.50E-10 |
| 6 | rs9276106                                | 32696963 | C      | ADD | 148611 | 0.8479 | -6.197 | 5.77E-10 |
| 6 | rs9276106                                | 32697037 | T      | ADD | 148768 | 0.8484 | -6.179 | 6.44E-10 |
| 6 | rs9276111                                | 32697160 | C      | ADD | 148656 | 0.8485 | -6.172 | 6.74E-10 |
| 6 | rs9276127                                | 32697606 | C      | ADD | 148766 | 0.8484 | -6.179 | 6.45E-10 |
| 6 | rs9276132                                | 32697755 | G      | ADD | 148395 | 0.8515 | -6.03  | 1.64E-09 |
| 6 | rs9276138                                | 32697893 | T      | ADD | 148768 | 0.8472 | -6.228 | 4.73E-10 |
| 6 | 6:32698360_CT<br>rs9276149<br>CTCAGTGT_C | 32698156 | T      | ADD | 148769 | 0.8472 | -6.228 | 4.71E-10 |
| 6 | rs9276164                                | 32698360 | C      | ADD | 148586 | 0.8483 | -6.179 | 6.47E-10 |
| 6 | rs9276164                                | 32698468 | T      | ADD | 148771 | 0.8472 | -6.227 | 4.75E-10 |
| 6 | rs9276168                                | 32698790 | G      | ADD | 148773 | 0.8472 | -6.228 | 4.72E-10 |
| 6 | rs9276171                                | 32698918 | G      | ADD | 148741 | 0.8443 | -6.386 | 1.71E-10 |
| 6 | rs9276172                                | 32698947 | C      | ADD | 148768 | 0.847  | -6.239 | 4.39E-10 |
| 6 | rs112350825                              | 32699144 | C      | ADD | 108617 | 0.8469 | -6.173 | 6.69E-10 |
| 6 | rs9276188                                | 32699262 | C      | ADD | 148782 | 0.8471 | -6.232 | 4.61E-10 |
| 6 | rs150842907                              | 32699274 | A<br>T | ADD | 148390 | 0.8439 | -6.347 | 2.19E-10 |
| 6 | rs9276190                                | 32699350 | T      | ADD | 148782 | 0.8471 | -6.232 | 4.61E-10 |
| 6 | rs9276191                                | 32699437 | A      | ADD | 148782 | 0.8471 | -6.232 | 4.61E-10 |
| 6 | rs9276198                                | 32699633 | A      | ADD | 148764 | 0.8475 | -6.216 | 5.11E-10 |
| 6 | rs9276201                                | 32699662 | G      | ADD | 148780 | 0.8472 | -6.23  | 4.65E-10 |
| 6 | rs2858884                                | 32700083 | C      | ADD | 148783 | 0.8587 | -5.788 | 7.12E-09 |
| 6 | rs2858883                                | 32700761 | C      | ADD | 148759 | 0.8756 | -6.004 | 1.92E-09 |
| 6 | rs9276242                                | 32701189 | C      | ADD | 148779 | 0.8471 | -6.232 | 4.61E-10 |
| 6 | rs2859088                                | 32701295 | T      | ADD | 148770 | 0.8759 | -5.986 | 2.15E-09 |
| 6 | rs2859087                                | 32701338 | G      | ADD | 148782 | 0.8586 | -5.793 | 6.90E-09 |
| 6 | rs9276249                                | 32701372 | A      | ADD | 148778 | 0.8468 | -6.246 | 4.20E-10 |
| 6 | rs9276251                                | 32701444 | A      | ADD | 148780 | 0.8471 | -6.232 | 4.60E-10 |
| 6 | rs2859081                                | 32702108 | G      | ADD | 148779 | 0.8586 | -5.792 | 6.96E-09 |
| 6 | rs2859079                                | 32702381 | G      | ADD | 148782 | 0.8586 | -5.794 | 6.88E-09 |
| 6 | rs2859078                                | 32702449 | G      | ADD | 148783 | 0.8578 | -5.832 | 5.46E-09 |

|   |                      |          |        |     |        |        |        |          |
|---|----------------------|----------|--------|-----|--------|--------|--------|----------|
| 6 | rs2859076            | 32702586 | A      | ADD | 148782 | 0.8586 | -5.794 | 6.88E-09 |
| 6 | rs9276286            | 32702722 | T      | ADD | 148742 | 0.8583 | -5.803 | 6.51E-09 |
| 6 | rs2859075            | 32702798 | G      | ADD | 148782 | 0.8586 | -5.794 | 6.88E-09 |
| 6 | 6:32703231_G<br>_G   | 32703231 | G      | ADD | 147879 | 0.8424 | -6.388 | 1.68E-10 |
| 6 | rs9276306            | 32703589 | A      | ADD | 148772 | 0.847  | -6.236 | 4.48E-10 |
| 6 | rs6457642            | 32704362 | T      | ADD | 148073 | 0.8452 | -6.405 | 1.51E-10 |
| 6 | rs9276313            | 32704706 | A      | ADD | 148769 | 0.8471 | -6.233 | 4.56E-10 |
| 6 | rs9276314            | 32704786 | T      | ADD | 148776 | 0.8468 | -6.244 | 4.25E-10 |
| 6 | rs9276325            | 32705210 | T      | ADD | 148779 | 0.8469 | -6.241 | 4.35E-10 |
| 6 | rs9276327            | 32705401 | T      | ADD | 148781 | 0.8469 | -6.241 | 4.34E-10 |
| 6 | rs9276339            | 32705700 | A      | ADD | 148779 | 0.847  | -6.238 | 4.43E-10 |
| 6 | 6:32705862_A<br>G_A  | 32705862 | A      | ADD | 148739 | 0.8439 | -6.401 | 1.54E-10 |
| 6 | rs9276348            | 32706209 | G      | ADD | 148777 | 0.8441 | -6.394 | 1.62E-10 |
| 6 | rs9276351            | 32706416 | A      | ADD | 148783 | 0.844  | -6.399 | 1.56E-10 |
| 6 | rs9276357            | 32706559 | G      | ADD | 148783 | 0.8475 | -6.218 | 5.05E-10 |
| 6 | rs9276358            | 32706725 | G      | ADD | 148782 | 0.8469 | -6.241 | 4.34E-10 |
| 6 | rs9276361            | 32706936 | A      | ADD | 148763 | 0.8437 | -6.411 | 1.45E-10 |
| 6 | rs9276363            | 32707023 | C      | ADD | 148416 | 0.8474 | -6.209 | 5.32E-10 |
| 6 | rs9276365            | 32707040 | A      | ADD | 148423 | 0.8445 | -6.365 | 1.95E-10 |
| 6 | rs71536152           | 32707352 | A<br>T | ADD | 148697 | 0.8464 | -6.259 | 3.88E-10 |
| 6 | rs9276375            | 32707585 | A      | ADD | 148766 | 0.8469 | -6.242 | 4.33E-10 |
| 6 | rs5021448            | 32707706 | T      | ADD | 148767 | 0.8441 | -6.396 | 1.60E-10 |
| 6 | rs5021452            | 32708074 | T      | ADD | 146518 | 0.8432 | -6.339 | 2.32E-10 |
| 6 | rs5021453            | 32708124 | G      | ADD | 146547 | 0.8666 | -6.397 | 1.59E-10 |
| 6 | 6:32708511_CT<br>G_C | 32708511 | C      | ADD | 148689 | 0.8422 | -6.472 | 9.67E-11 |
| 6 | rs9276401            | 32709204 | C      | ADD | 148731 | 0.8473 | -6.224 | 4.85E-10 |
| 6 | rs4394270            | 32709964 | C      | ADD | 148783 | 0.8775 | -5.857 | 4.71E-09 |
| 6 | rs4496840            | 32709990 | T      | ADD | 148769 | 0.8777 | -5.847 | 5.00E-09 |
| 6 | rs4403295            | 32710010 | T      | ADD | 148751 | 0.8777 | -5.845 | 5.08E-09 |
| 6 | rs9276425            | 32711050 | T      | ADD | 148434 | 0.8487 | -6.058 | 1.38E-09 |
| 6 | rs9276456            | 32715943 | G      | ADD | 148247 | 0.8464 | -6.142 | 8.14E-10 |
| 6 | rs9276550            | 32722243 | T      | ADD | 148780 | 0.8479 | -6.092 | 1.11E-09 |
| 6 | rs9276555            | 32722754 | A      | ADD | 148783 | 0.8489 | -6.051 | 1.44E-09 |
| 6 | rs9276556            | 32723233 | C      | ADD | 148783 | 0.8474 | -6.115 | 9.63E-10 |
| 6 | rs9276576            | 32725832 | G      | ADD | 148724 | 0.8474 | -6.108 | 1.01E-09 |
| 6 | rs9276584            | 32730835 | T      | ADD | 148710 | 0.8488 | -6.047 | 1.47E-09 |
| 6 | rs9276585            | 32731313 | A      | ADD | 148711 | 0.8487 | -6.05  | 1.45E-09 |

|   |                                                       |          |   |     |        |        |        |          |
|---|-------------------------------------------------------|----------|---|-----|--------|--------|--------|----------|
| 6 | rs9276607                                             | 32737257 | T | ADD | 148783 | 0.8486 | -6.055 | 1.41E-09 |
| 6 | rs1367728                                             | 33034815 | A | ADD | 148783 | 0.8069 | -5.832 | 5.47E-09 |
| 6 | rs2301225                                             | 33035860 | A | ADD | 148672 | 0.8047 | -5.895 | 3.75E-09 |
| 6 | rs28986425<br>6:33041188_A<br>ATTGATGTG<br>AACCACCCC_ | 33039535 | T | ADD | 148716 | 0.8055 | -5.865 | 4.50E-09 |
| 6 | A                                                     | 33041188 | A | ADD | 148016 | 0.8067 | -5.812 | 6.16E-09 |
| 6 | rs6934289                                             | 33044956 | C | ADD | 148550 | 0.8053 | -5.89  | 3.87E-09 |
| 6 | rs14362                                               | 33052981 | A | ADD | 148316 | 0.8088 | -5.752 | 8.81E-09 |
| 6 | rs2179918                                             | 33062016 | C | ADD | 148734 | 0.806  | -5.864 | 4.53E-09 |
| 6 | rs3117245                                             | 33069567 | A | ADD | 148678 | 0.8053 | -5.881 | 4.09E-09 |
| 6 | rs35701899                                            | 33079450 | C | ADD | 148502 | 0.8092 | -5.757 | 8.57E-09 |



**Supplement Table 8.** Summary of LD clumping of discovery cohort.

| CHR | RSID              | BP        | P        | TOTAL | NSIG | S05 | S01 | S001 | S0001 |      |
|-----|-------------------|-----------|----------|-------|------|-----|-----|------|-------|------|
| 2   | 2:113992800_TCC_T | 113992800 | 8.76E-10 | 225   |      | 90  | 44  | 18   | 5     | 68   |
| 5   | rs27069           | 1347128   | 2.51E-09 | 136   |      | 21  | 8   | 19   | 10    | 78   |
| 6   | rs9272050         | 32599071  | 2.51E-28 | 6681  |      | 643 | 601 | 469  | 388   | 4580 |
| 6   | rs2523496         | 31377719  | 1.74E-20 | 2651  |      | 818 | 329 | 315  | 220   | 969  |
| 6   | rs55986091        | 32623713  | 6.42E-22 | 1927  |      | 118 | 190 | 133  | 306   | 1180 |
| 6   | rs9274715         | 32637391  | 1.01E-12 | 5691  | 2072 | 573 | 673 | 446  | 446   | 1927 |
| 6   | rs2523545         | 31333499  | 1.82E-12 | 2086  |      | 235 | 340 | 157  | 424   | 930  |
| 6   | rs144847276       | 31335416  | 6.33E-11 | 306   |      | 151 | 27  | 31   | 28    | 69   |
| 6   | rs2070600         | 32151443  | 3.98E-10 | 895   |      | 211 | 306 | 125  | 139   | 114  |
| 6   | rs113547322       | 32206619  | 1.20E-09 | 1064  |      | 19  | 23  | 23   | 96    | 903  |
| 6   | 6:31530636_CAA_C  | 31530636  | 2.96E-09 | 620   |      | 309 | 45  | 150  | 39    | 77   |
| 6   | rs2301225         | 33035860  | 3.75E-09 | 317   |      | 99  | 13  | 54   | 10    | 141  |
| 6   | rs116071718       | 30990081  | 9.06E-09 | 452   |      | 73  | 67  | 201  | 99    | 12   |

TOTAL Total number of other SNPs in clump (pass >1000kb and >0.9

NSIG Number of clumped SNPs that are not significant (  $p > 0.05$  )

S05 Number of clumped SNPs  $0.01 < p < 0.05$

S01 Number of clumped SNPs  $0.001 < p < 0.01$

S001 Number of clumped SNPs  $0.0001 < p < 0.001$

S0001 Number of clumped SNPs  $p < 0.0001$



|    | I                                                               | J                                                               | K             | L             | M              | N                       |
|----|-----------------------------------------------------------------|-----------------------------------------------------------------|---------------|---------------|----------------|-------------------------|
| 1  |                                                                 |                                                                 |               |               |                |                         |
| 2  |                                                                 |                                                                 |               |               |                |                         |
| 3  | <b>INITIAL SAMPLE SIZE</b>                                      | <b>REPLICATION SAMPLE SIZE</b>                                  | <b>REGION</b> | <b>CHR_ID</b> | <b>CHR_POS</b> | <b>REPORTED GENE(S)</b> |
| 4  | 1,034 European ancestry cases, 3,948 European ancestry controls | 1,140 European ancestry cases, 1,058 European ancestry controls |               |               |                | HLA                     |
| 5  | 1,034 European ancestry cases, 3,948 European ancestry controls | 1,140 European ancestry cases, 1,058 European ancestry controls |               |               |                | HLA                     |
| 6  | 1,034 European ancestry cases, 3,948 European ancestry controls | 1,140 European ancestry cases, 1,058 European ancestry controls | 6p21.33       | 6             | 31422633       | MICA                    |
| 7  | 1,034 European ancestry cases, 3,948 European ancestry controls | 1,140 European ancestry cases, 1,058 European ancestry controls | 6p21.32       | 6             | 32633026       | HLA-DRB1, HLA-DQA1      |
| 8  | 1,034 European ancestry cases, 3,948 European ancestry controls | 1,140 European ancestry cases, 1,058 European ancestry controls | 6p21.32       | 6             | 33121846       | HLA-DPB2                |
| 9  | 1,034 European ancestry cases, 3,948 European ancestry controls | 1,140 European ancestry cases, 1,058 European ancestry controls |               |               |                | HLA-B                   |
| 10 | 226 Japanese ancestry cases, 186 Japanese ancestry controls     | NA                                                              | 16p13.2       | 16            | 9232128        | intergenic              |
| 11 | 226 Japanese ancestry cases, 186 Japanese ancestry controls     | NA                                                              | 8p21.3        | 8             | 20734998       | intergenic              |
| 12 | 226 Japanese ancestry cases, 186 Japanese ancestry controls     | NA                                                              | 8p23.3        | 8             | 2021565        | intergenic              |
| 13 | 226 Japanese ancestry cases, 186 Japanese ancestry controls     | NA                                                              | 7q21.13       | 7             | 88970471       | ZNF804B                 |
| 14 | 226 Japanese ancestry cases, 186 Japanese ancestry controls     | NA                                                              | 2q36.3        | 2             | 227644742      | intergenic              |
| 15 | 226 Japanese ancestry cases, 186 Japanese ancestry controls     | NA                                                              | 7q11.23       | 7             | 77433395       | intergenic              |
| 16 | 226 Japanese ancestry cases, 186 Japanese ancestry controls     | NA                                                              | 2q14.2        | 2             | 118131653      | intergenic              |
| 17 | 226 Japanese ancestry cases, 186 Japanese ancestry controls     | NA                                                              | 18q22.3       | 18            | 72259522       | intergenic              |
| 18 | 226 Japanese ancestry cases, 186 Japanese ancestry controls     | NA                                                              | 1q23.3        | 1             | 160773959      | intergenic              |
| 19 | 538 Japanese ancestry cases, 39,556 Japanese ancestry controls  | NA                                                              | 12q24.23      | 12            | 119604245      | Intergenic              |
| 20 | 538 Japanese ancestry cases, 39,556 Japanese ancestry controls  | NA                                                              | 13q12.11      | 13            | 22100187       | Intergenic              |
| 21 | 538 Japanese ancestry cases, 39,556 Japanese ancestry controls  | NA                                                              | 13q33.3       | 13            | 106422664      | Intergenic              |
| 22 | 538 Japanese ancestry cases, 39,556 Japanese ancestry controls  | NA                                                              | 14q11.2       | 14            | 20259308       | Intergenic              |
| 23 | 538 Japanese ancestry cases, 39,556 Japanese ancestry controls  | NA                                                              | 14q11.2       | 14            | 20368118       | Intergenic              |
| 24 | 538 Japanese ancestry cases, 39,556 Japanese ancestry controls  | NA                                                              | 14q21.1       | 14            | 41755191       | Intergenic              |
| 25 | 538 Japanese ancestry cases, 39,556 Japanese ancestry controls  | NA                                                              | 14q32.31      | 14            | 101059844      | Intergenic              |
| 26 | 538 Japanese ancestry cases, 39,556 Japanese ancestry controls  | NA                                                              | 16p13.3       | 16            | 6687493        | Intergenic              |
| 27 | 538 Japanese ancestry cases, 39,556 Japanese ancestry controls  | NA                                                              | 17q24.3       | 17            | 72101710       | Intergenic              |
| 28 | 538 Japanese ancestry cases, 39,556 Japanese ancestry controls  | NA                                                              | 19q13.32      | 19            | 45666590       | Intergenic              |
| 29 | 538 Japanese ancestry cases, 39,556 Japanese ancestry controls  | NA                                                              | 19q13.41      | 19            | 51734303       | Intergenic              |
| 30 | 538 Japanese ancestry cases, 39,556 Japanese ancestry controls  | NA                                                              | 20p13         | 20            | 4817030        | Intergenic              |
| 31 | 538 Japanese ancestry cases, 39,556 Japanese ancestry controls  | NA                                                              | 20q13.33      | 20            | 64106159       | Intergenic              |
| 32 | 538 Japanese ancestry cases, 39,556 Japanese ancestry controls  | NA                                                              | 6p22.1        | 6             | 29829266       | Intergenic              |
| 33 | 538 Japanese ancestry cases, 39,556 Japanese ancestry controls  | NA                                                              | 6p22.1        | 6             | 30075223       | Intergenic              |
| 34 | 538 Japanese ancestry cases, 39,556 Japanese ancestry controls  | NA                                                              | 6p21.33       | 6             | 30830500       | Intergenic              |
| 35 | 538 Japanese ancestry cases, 39,556 Japanese ancestry controls  | NA                                                              | 6p21.33       | 6             | 30972610       | Intergenic              |
| 36 | 538 Japanese ancestry cases, 39,556 Japanese ancestry controls  | NA                                                              | 6p21.33       | 6             | 31245753       | Intergenic              |
| 37 | 538 Japanese ancestry cases, 39,556 Japanese ancestry controls  | NA                                                              | 6p21.33       | 6             | 31330644       | Intergenic              |
| 38 | 538 Japanese ancestry cases, 39,556 Japanese ancestry controls  | NA                                                              | 6p21.33       | 6             | 31762974       | Intergenic              |
| 39 | 538 Japanese ancestry cases, 39,556 Japanese ancestry controls  | NA                                                              | 6p21.33       | 6             | 31972441       | Intergenic              |
| 40 | 538 Japanese ancestry cases, 39,556 Japanese ancestry controls  | NA                                                              | 6p21.33       | 6             | 32093562       | Intergenic              |
| 41 | 538 Japanese ancestry cases, 39,556 Japanese ancestry controls  | NA                                                              | 6p21.32       | 6             | 32241674       | Intergenic              |
| 42 | 538 Japanese ancestry cases, 39,556 Japanese ancestry controls  | NA                                                              | 6p21.32       | 6             | 32609610       | Intergenic              |
| 43 | 538 Japanese ancestry cases, 39,556 Japanese ancestry controls  | NA                                                              | 6p21.32       | 6             | 32714813       | Intergenic              |
| 44 | 538 Japanese ancestry cases, 39,556 Japanese ancestry controls  | NA                                                              | 6p21.32       | 6             | 32920459       | Intergenic              |
| 45 | 538 Japanese ancestry cases, 39,556 Japanese ancestry controls  | NA                                                              | 6p21.32       | 6             | 33107666       | Intergenic              |
| 46 | 538 Japanese ancestry cases, 39,556 Japanese ancestry controls  | NA                                                              | 6q22.31       | 6             | 122773922      | Intergenic              |
| 47 | 538 Japanese ancestry cases, 39,556 Japanese ancestry controls  | NA                                                              | 7q22.3        | 7             | 105691372      | Intergenic              |
| 48 | 538 Japanese ancestry cases, 39,556 Japanese ancestry controls  | NA                                                              | 7q33          | 7             | 133504366      | Intergenic              |
| 49 | 538 Japanese ancestry cases, 39,556 Japanese ancestry controls  | NA                                                              | 7q33          | 7             | 133732785      | Intergenic              |
| 50 | 538 Japanese ancestry cases, 39,556 Japanese ancestry controls  | NA                                                              | 8p23.1        | 8             | 9854826        | Intergenic              |
| 51 | 538 Japanese ancestry cases, 39,556 Japanese ancestry controls  | NA                                                              | 8q12.1        | 8             | 56298047       | Intergenic              |
| 52 | 538 Japanese ancestry cases, 39,556 Japanese ancestry controls  | NA                                                              | 9q21.2        | 9             | 76775287       | Intergenic              |
| 53 | 538 Japanese ancestry cases, 39,556 Japanese ancestry controls  | NA                                                              | 9q32          | 9             | 112272205      | Intergenic              |
| 54 | 538 Japanese ancestry cases, 39,556 Japanese ancestry controls  | NA                                                              | 10p13         | 10            | 17199011       | Intergenic              |
| 55 | 538 Japanese ancestry cases, 39,556 Japanese ancestry controls  | NA                                                              | 11p15.5       | 11            | 2158112        | Intergenic              |
| 56 | 538 Japanese ancestry cases, 39,556 Japanese ancestry controls  | NA                                                              | 12p11.22      | 12            | 29599423       | Intergenic              |
| 57 | 538 Japanese ancestry cases, 39,556 Japanese ancestry controls  | NA                                                              | 6p22.1        | 6             | 27811880       | Intergenic              |
| 58 | 538 Japanese ancestry cases, 39,556 Japanese ancestry controls  | NA                                                              | 6p22.1        | 6             | 28137256       | Intergenic              |
| 59 | 538 Japanese ancestry cases, 39,556 Japanese ancestry controls  | NA                                                              | 6p22.1        | 6             | 28356161       | Intergenic              |
| 60 | 538 Japanese ancestry cases, 39,556 Japanese ancestry controls  | NA                                                              | 6p22.1        | 6             | 28467717       | Intergenic              |
| 61 | 538 Japanese ancestry cases, 39,556 Japanese ancestry controls  | NA                                                              | 6p22.1        | 6             | 28639807       | Intergenic              |
| 62 | 538 Japanese ancestry cases, 39,556 Japanese ancestry controls  | NA                                                              | 6p22.1        | 6             | 28800350       | Intergenic              |
| 63 | 538 Japanese ancestry cases, 39,556 Japanese ancestry controls  | NA                                                              | 6p22.1        | 6             | 29016978       | Intergenic              |

|    | O                                                                            | P                    | Q                      |
|----|------------------------------------------------------------------------------|----------------------|------------------------|
| 1  |                                                                              |                      |                        |
| 2  |                                                                              |                      |                        |
| 3  | <b>MAPPED_GENE</b>                                                           | <b>UPSTREAM_GENE</b> | <b>DOWNSTREAM_GENE</b> |
| 4  |                                                                              |                      |                        |
| 5  |                                                                              |                      |                        |
| 6  | AL645933.5                                                                   |                      |                        |
| 7  | HLA-DQA1, HLA-DQA1, HLA-DQA1, HLA-DQA1, HLA-DQA1                             |                      |                        |
| 8  | HLA-DPB2, HLA-DPB2, HLA-DPB2, HLA-DPB2, HLA-DPB2, HLA-DPB2, HLA-DPB2         |                      |                        |
| 9  |                                                                              |                      |                        |
| 10 | RPL21P119 - LINC02177                                                        | ENSG00000220793      | ENSG00000261617        |
| 11 | AC018541.1 - TMEM97P2                                                        | ENSG00000253300      | ENSG00000253866        |
| 12 | KBTBD11 - AC245164.1                                                         | ENSG00000273645      | ENSG00000253805        |
| 13 | ZNF804B                                                                      |                      |                        |
| 14 | C2orf83                                                                      |                      |                        |
| 15 | AC004921.1 - GCNT1P5                                                         | ENSG00000273341      | ENSG00000237620        |
| 16 | INSIG2 - THORLNC                                                             | ENSG00000125629      | ENSG00000226856        |
| 17 | AC069114.1 - CBLN2                                                           | ENSG00000265995      | ENSG00000141668        |
| 18 | SLAMF7 - AL121985.3                                                          | ENSG00000026751      | ENSG00000275801        |
| 19 | TMEM233, AC002070.1                                                          |                      |                        |
| 20 | AL136962.1                                                                   |                      |                        |
| 21 | LINC00460 - RPL35P9                                                          | ENSG00000233532      | ENSG00000174418        |
| 22 | TTC5                                                                         |                      |                        |
| 23 | TEP1                                                                         |                      |                        |
| 24 | LRFN5                                                                        |                      |                        |
| 25 | MIR154 - MIR496                                                              | ENSG00000207978      | ENSG00000207961        |
| 26 | RBFOX1                                                                       |                      |                        |
| 27 | LINC02097, SOX9-AS1                                                          |                      |                        |
| 28 | RN7SL836P - GIPR                                                             | ENSG00000241226      | ENSG00000010310        |
| 29 | HAS1 - FPR1                                                                  | ENSG00000105509      | ENSG00000171051        |
| 30 | RASSF2                                                                       |                      |                        |
| 31 | NPBWR2, MYT1                                                                 |                      |                        |
| 32 | HLA-G, HLA-G, HLA-G, HLA-G, HLA-G, HLA-G, HLA-G, HLA-G                       |                      |                        |
| 33 | RNF39, RNF39, RNF39, RNF39, RNF39, RNF39, RNF39, RNF39                       |                      |                        |
| 34 | LINC00243                                                                    |                      |                        |
| 35 | NAPGP2 - MUC21                                                               | ENSG00000275906      | ENSG00000231350        |
| 36 | AL662844.2 - HLA-C                                                           | ENSG00000255899      | ENSG00000228299        |
| 37 | HLA-B, HLA-B, HLA-B, HLA-B, HLA-B, HLA-B                                     |                      |                        |
| 38 | MSH5-SAPCD1, MSH5-SAPCD1, MSH5-SAPCD1, MSH5-SAPCD1, MSH5-SAPCD1, MSH5-SAPCD1 |                      |                        |
| 39 | STK19, STK19, STK19, STK19, STK19, STK19                                     |                      |                        |
| 40 | TNXB, TNXB, TNXB, TNXB, TNXB, TNXB                                           |                      |                        |
| 41 | NOTCH4 - TSBP1-AS1                                                           | ENSG00000206312      | ENSG00000235135        |
| 42 | HLA-DRB1 - HLA-DQA1                                                          | ENSG00000206240      | ENSG00000196735        |
| 43 | MTCO3P1 - AL662789.1                                                         | ENSG00000237145      | ENSG00000232080        |
| 44 | HLA-Z - HLA-DMB                                                              | ENSG00000237871      | ENSG00000226264        |
| 45 | COL11A2P1 - HLA-DPB2                                                         | ENSG00000230816      | ENSG00000225132        |
| 46 | RN7SL564P - FABP7                                                            | ENSG00000240606      | ENSG00000164434        |
| 47 | ATXN7L1                                                                      |                      |                        |
| 48 | EXOC4                                                                        |                      |                        |
| 49 | RPS3AP27, EXOC4                                                              |                      |                        |
| 50 | TNKS - LINC00599                                                             | ENSG00000173273      | ENSG00000253230        |
| 51 | AC107952.1 - SDR16C5                                                         | ENSG00000254216      | ENSG00000170786        |
| 52 | PCA3, PRUNE2                                                                 |                      |                        |
| 53 | PTBP3                                                                        |                      |                        |
| 54 | TRDMT1                                                                       |                      |                        |
| 55 | INS-IGF2, AC132217.2                                                         |                      |                        |
| 56 | TMTC1                                                                        |                      |                        |
| 57 | H3C10 - H2AC14                                                               | ENSG00000278828      | ENSG00000276368        |
| 58 | AL358933.1, ZSCAN16-AS1                                                      |                      |                        |
| 59 | ZKSCAN3, ZSCAN31                                                             |                      |                        |
| 60 | OR2E1P - Z98745.2                                                            | ENSG00000219262      | ENSG00000287804        |
| 61 | AL121932.2                                                                   |                      |                        |
| 62 | NOP56P1 - AL662890.1                                                         | ENSG00000273323      | ENSG00000225173        |
| 63 | ZNF311 - OR2AD1P                                                             | ENSG00000197935      | ENSG00000233650        |

|    | R                                                                                                                                      | S                                                     | T      | U                               | V           |
|----|----------------------------------------------------------------------------------------------------------------------------------------|-------------------------------------------------------|--------|---------------------------------|-------------|
| 1  |                                                                                                                                        |                                                       |        |                                 |             |
| 2  |                                                                                                                                        |                                                       |        |                                 |             |
| 3  | <b>SNP_GENE_IDS</b>                                                                                                                    | <b>UPSTREAM (DOWNSTREAM_STRONGEST SNP-RISK ALLELE</b> |        |                                 | <b>SNPS</b> |
| 4  |                                                                                                                                        |                                                       |        | DRB1*1301-DQA1*0103-DQB1*0603-? | DRB1*1301-D |
| 5  |                                                                                                                                        |                                                       |        | DRB1*1501-DQB1*0602-?           | DRB1*1501-D |
| 6  | ENSG00000288587                                                                                                                        |                                                       |        | rs2516448-?                     | rs2516448   |
| 7  | ENSG00000232062, ENSG00000206305, ENSG00000236418, ENSG00000225890, ENSG00000196735                                                    |                                                       |        | rs9272143-?                     | rs9272143   |
| 8  | ENSG00000168379, ENSG00000226071, ENSG00000234834, ENSG00000224557, ENSG00000225429, ENSG00000223372, ENSG00000225132                  |                                                       |        | rs3117027-?                     | rs3117027   |
| 9  |                                                                                                                                        |                                                       |        | HLA-B*0702-?                    | HLA-B*0702  |
| 10 |                                                                                                                                        | 75247                                                 | 123460 | rs4782151-C                     | rs4782151   |
| 11 |                                                                                                                                        | 34846                                                 | 199437 | rs11985951-T                    | rs11985951  |
| 12 |                                                                                                                                        | 14629                                                 | 11943  | rs6558578-G                     | rs6558578   |
| 13 | ENSG00000182348                                                                                                                        |                                                       |        | rs3899697-A                     | rs3899697   |
| 14 | ENSG00000042304                                                                                                                        |                                                       |        | rs997363-C                      | rs997363    |
| 15 |                                                                                                                                        | 7951                                                  | 28063  | rs7780883-A                     | rs7780883   |
| 16 |                                                                                                                                        | 20656                                                 | 475    | rs6726538-A                     | rs6726538   |
| 17 |                                                                                                                                        | 314945                                                | 277158 | rs8088832-C                     | rs8088832   |
| 18 |                                                                                                                                        | 19138                                                 | 1995   | rs12068654-T                    | rs12068654  |
| 19 | ENSG00000224982, ENSG00000248636                                                                                                       |                                                       |        | rs142761815-?                   | rs142761815 |
| 20 | ENSG00000276476                                                                                                                        |                                                       |        | rs146343995-?                   | rs146343995 |
| 21 |                                                                                                                                        | 38349                                                 | 3109   | rs141629209-?                   | rs141629209 |
| 22 | ENSG00000136319                                                                                                                        |                                                       |        | rs145233920-?                   | rs145233920 |
| 23 | ENSG00000129566                                                                                                                        |                                                       |        | rs149049108-?                   | rs149049108 |
| 24 | ENSG00000165379                                                                                                                        |                                                       |        | rs138523818-?                   | rs138523818 |
| 25 |                                                                                                                                        | 6                                                     | 729    | rs41286572-?                    | rs41286572  |
| 26 | ENSG00000078328                                                                                                                        |                                                       |        | rs72764914-?                    | rs72764914  |
| 27 | ENSG00000226101, ENSG00000234899                                                                                                       |                                                       |        | rs140991990-?                   | rs140991990 |
| 28 |                                                                                                                                        | 14785                                                 | 1631   | rs56182403-?                    | rs56182403  |
| 29 |                                                                                                                                        | 10312                                                 | 10869  | rs75724373-?                    | rs75724373  |
| 30 | ENSG00000101265                                                                                                                        |                                                       |        | rs201524967-?                   | rs201524967 |
| 31 | ENSG00000125522, ENSG00000196132                                                                                                       |                                                       |        | rs75874947-?                    | rs75874947  |
| 32 | ENSG00000206506, ENSG00000233095, ENSG00000237216, ENSG00000276051, ENSG00000204632, ENSG00000230413, ENSG00000235346, ENSG00000235680 |                                                       |        | rs145023077-?                   | rs145023077 |
| 33 | ENSG00000235022, ENSG00000237733, ENSG00000230467, ENSG00000227171, ENSG00000206500, ENSG00000236967, ENSG00000230332, ENSG00000204618 |                                                       |        | rs142979264-?                   | rs142979264 |
| 34 | ENSG00000214894                                                                                                                        |                                                       |        | rs78868683-?                    | rs78868683  |
| 35 |                                                                                                                                        | 10214                                                 | 11108  | rs2530710-?                     | rs2530710   |
| 36 |                                                                                                                                        | 20695                                                 | 22996  | rs117759870-?                   | rs117759870 |
| 37 | ENSG00000228964, ENSG00000223532, ENSG00000234745, ENSG00000232126, ENSG00000224608, ENSG00000206450                                   |                                                       |        | rs28752857-?                    | rs28752857  |
| 38 | ENSG00000254405, ENSG00000255419, ENSG00000255152, ENSG00000264619, ENSG00000266442, ENSG00000266027                                   |                                                       |        | rs28399987-?                    | rs28399987  |
| 39 | ENSG00000234947, ENSG00000226257, ENSG00000204344, ENSG00000206342, ENSG00000236250, ENSG00000226033                                   |                                                       |        | rs75393409-?                    | rs75393409  |
| 40 | ENSG00000168477, ENSG00000236236, ENSG00000206258, ENSG00000229353, ENSG00000233323, ENSG00000231608                                   |                                                       |        | rs57079996-?                    | rs57079996  |
| 41 |                                                                                                                                        | 17607                                                 | 12966  | rs380911-?                      | rs380911    |
| 42 |                                                                                                                                        | 19762                                                 | 18569  | rs36022506-?                    | rs36022506  |
| 43 |                                                                                                                                        | 7858                                                  | 3192   | rs113721192-?                   | rs113721192 |
| 44 |                                                                                                                                        | 23969                                                 | 14170  | rs117231810-?                   | rs117231810 |
| 45 |                                                                                                                                        | 336                                                   | 4785   | rs910320-?                      | rs910320    |
| 46 |                                                                                                                                        | 28393                                                 | 5794   | rs9375182-?                     | rs9375182   |
| 47 | ENSG00000146776                                                                                                                        |                                                       |        | rs10272208-?                    | rs10272208  |
| 48 | ENSG00000131558                                                                                                                        |                                                       |        | rs147175877-?                   | rs147175877 |
| 49 | ENSG00000226205, ENSG00000131558                                                                                                       |                                                       |        | rs149996974-?                   | rs149996974 |
| 50 |                                                                                                                                        | 72480                                                 | 45045  | rs2090064-?                     | rs2090064   |
| 51 |                                                                                                                                        | 44675                                                 | 1963   | rs4077818-?                     | rs4077818   |
| 52 | ENSG00000225937, ENSG00000106772                                                                                                       |                                                       |        | rs17784899-?                    | rs17784899  |
| 53 | ENSG00000119314                                                                                                                        |                                                       |        | rs140330106-?                   | rs140330106 |
| 54 | ENSG00000107614                                                                                                                        |                                                       |        | rs147380957-?                   | rs147380957 |
| 55 | ENSG00000129965, ENSG00000284779                                                                                                       |                                                       |        | rs150806792-?                   | rs150806792 |
| 56 | ENSG00000133687                                                                                                                        |                                                       |        | rs377042484-?                   | rs377042484 |
| 57 |                                                                                                                                        | 580                                                   | 2422   | rs144335201-?                   | rs144335201 |
| 58 | ENSG00000261839, ENSG00000269293                                                                                                       |                                                       |        | rs79476506-?                    | rs79476506  |
| 59 | ENSG00000189298, ENSG00000235109                                                                                                       |                                                       |        | rs213237-?                      | rs213237    |
| 60 |                                                                                                                                        | 11576                                                 | 9279   | rs77011267-?                    | rs77011267  |
| 61 | ENSG00000287279                                                                                                                        |                                                       |        | rs138803712-?                   | rs138803712 |
| 62 |                                                                                                                                        | 16346                                                 | 37519  | rs141456208-?                   | rs141456208 |
| 63 |                                                                                                                                        | 11662                                                 | 9702   | rs3129795-?                     | rs3129795   |

|    | W      | X           | Y                                  | Z               | AA      | AB       | AC          | AD         | AE            | AF                           | AG           | AH                 | AI           | AJ              |
|----|--------|-------------|------------------------------------|-----------------|---------|----------|-------------|------------|---------------|------------------------------|--------------|--------------------|--------------|-----------------|
| 1  |        |             |                                    |                 |         |          |             |            |               |                              |              |                    |              |                 |
| 2  |        |             |                                    |                 |         |          |             |            |               |                              |              |                    |              |                 |
| 3  | MERGED | SNP_ID_CURR | CONTEXT                            | INTERGENIC RISK | ALLELE  | P-VALUE  | PVALUE_MLOG | OR or BETA | 95% CI (TEX   | PLATFORM                     | SNPS PASSING | QC CNV             | MAPPED_TRAIT | STUDY ACCESSION |
| 4  | 0      |             |                                    | 1               | NR      | 9.00E-10 | 9.045757491 | 2.13       | [1.67-2.70]   | illumina [632668]            | N            | cervical carcinoma | GCST001900   |                 |
| 5  | 0      |             |                                    | 1               | 0.15    | 4.00E-07 | 6.397940009 | 1.39       | [1.23-1.58]   | illumina [632668]            | N            | cervical carcinoma | GCST001900   |                 |
| 6  | 0      | 2516448     | intron_variant                     | 0               | NR      | 4.00E-18 | 17.39794001 | 1.42       | [1.31-1.54]   | illumina [632668]            | N            | cervical carcinoma | GCST001900   |                 |
| 7  | 0      | 9272143     | intron_variant                     | 0               | NR      | 3.00E-22 | 21.52287875 | 1.49       | [1.37-1.61]   | illumina [632668]            | N            | cervical carcinoma | GCST001900   |                 |
| 8  | 0      | 3117027     | intron_variant                     | 0               | NR      | 1.00E-07 | 7           | 1.25       | [1.15-1.36]   | illumina [632668]            | N            | cervical carcinoma | GCST001900   |                 |
| 9  | 0      |             |                                    | 1               | 0.14    | 8.00E-08 | 7.096910013 | 1.42       | [1.25-1.61]   | illumina [632668]            | N            | cervical carcinoma | GCST001900   |                 |
| 10 | 0      | 4782151     | regulatory_region_variant          | 1               | 0.4677  | 5.00E-06 | 5.301029996 | 1.91       | [1.44-2.52]   | Affymetrix [556045]          | N            | cervical carcinoma | GCST002405   |                 |
| 11 | 0      | 11985951    | intergenic_variant                 | 1               | 0.871   | 6.00E-06 | 5.22184875  | 3.36       | [1.94-5.83]   | Affymetrix [556045]          | N            | cervical carcinoma | GCST002405   |                 |
| 12 | 0      | 6558578     | intergenic_variant                 | 1               | 0.7608  | 7.00E-06 | 5.15490196  | 2.31       | [1.59-3.34]   | Affymetrix [556045]          | N            | cervical carcinoma | GCST002405   |                 |
| 13 | 0      | 3899697     | intron_variant                     | 0               | 0.2787  | 9.00E-06 | 5.045757491 | 1.949      | [1.449-2.621] | Affymetrix [556045]          | N            | cervical carcinoma | GCST002405   |                 |
| 14 | 0      | 997363      | intron_variant                     | 0               | 0.4032  | 1.00E-06 | 6           | 1.986      | [1.50-2.62]   | Affymetrix [556045]          | N            | cervical carcinoma | GCST002405   |                 |
| 15 | 0      | 7780883     | regulatory_region_variant          | 1               | 0.05376 | 2.00E-06 | 5.698970004 | 3.28       | [1.956-5.50]  | Affymetrix [556045]          | N            | cervical carcinoma | GCST002405   |                 |
| 16 | 0      | 6726538     | intergenic_variant                 | 1               | 0.3871  | 3.00E-06 | 5.522878745 | 1.946      | [1.471-2.573] | Affymetrix [556045]          | N            | cervical carcinoma | GCST002405   |                 |
| 17 | 0      | 8088832     | intergenic_variant                 | 1               | 0.508   | 4.00E-06 | 5.397940009 | 1.94       | [1.46-2.57]   | Affymetrix [556045]          | N            | cervical carcinoma | GCST002405   |                 |
| 18 | 0      | 12068654    | intergenic_variant                 | 1               | 0.885   | 5.00E-06 | 5.301029996 | 3.23       | [2.06-6.93]   | Affymetrix [556045]          | N            | cervical carcinoma | GCST002405   |                 |
| 19 | 0      | 142761815   | intron_variant                     | 0               |         | 4.00E-06 | 5.397940009 | 1.1        | [1.06-1.14]   | illumina [7645193] (imputed) | N            | cervical carcinoma | GCST009825   |                 |
| 20 | 0      | 146343995   | intron_variant                     | 0               |         | 5.00E-07 | 6.301029996 | 1.16       | [1.09-1.23]   | illumina [7645193] (imputed) | N            | cervical carcinoma | GCST009825   |                 |
| 21 | 0      | 141629209   | regulatory_region_variant          | 1               |         | 4.00E-07 | 6.397940009 | 1.17       | [1.10-1.25]   | illumina [7645193] (imputed) | N            | cervical carcinoma | GCST009825   |                 |
| 22 | 0      | 145233920   | intron_variant                     | 0               |         | 2.00E-06 | 5.698970004 | 1.08       | [1.05-1.11]   | illumina [7645193] (imputed) | N            | cervical carcinoma | GCST009825   |                 |
| 23 | 0      | 149049108   | 3_prime_UTR_variant                | 0               |         | 4.00E-06 | 5.397940009 | 1.09       | [1.05-1.13]   | illumina [7645193] (imputed) | N            | cervical carcinoma | GCST009825   |                 |
| 24 | 0      | 138523818   | intron_variant                     | 0               |         | 2.00E-06 | 5.698970004 | 1.14       | [1.08-1.20]   | illumina [7645193] (imputed) | N            | cervical carcinoma | GCST009825   |                 |
| 25 | 0      | 41286572    | intergenic_variant                 | 1               |         | 4.00E-06 | 5.397940009 | 1.09       | [1.05-1.13]   | illumina [7645193] (imputed) | N            | cervical carcinoma | GCST009825   |                 |
| 26 | 0      | 72764914    | intron_variant                     | 0               |         | 3.00E-07 | 6.522878745 | 1.07       | [1.04-1.10]   | illumina [7645193] (imputed) | N            | cervical carcinoma | GCST009825   |                 |
| 27 | 0      | 140991990   | intron_variant                     | 0               |         | 7.00E-08 | 7.15490196  | 1.16       | [1.10-1.23]   | illumina [7645193] (imputed) | N            | cervical carcinoma | GCST009825   |                 |
| 28 | 0      | 56182403    | regulatory_region_variant          | 1               |         | 9.00E-07 | 6.045757491 | 1.11       | [1.06-1.15]   | illumina [7645193] (imputed) | N            | cervical carcinoma | GCST009825   |                 |
| 29 | 0      | 75724373    | regulatory_region_variant          | 1               |         | 8.00E-06 | 5.096910013 | 1.04       | [1.02-1.06]   | illumina [7645193] (imputed) | N            | cervical carcinoma | GCST009825   |                 |
| 30 | 0      | 201524967   | intron_variant                     | 0               |         | 3.00E-06 | 5.522878745 | 1.14       | [1.08-1.20]   | illumina [7645193] (imputed) | N            | cervical carcinoma | GCST009825   |                 |
| 31 | 0      | 75874947    | missense_variant                   | 0               |         | 2.00E-07 | 6.698970004 | 1.12       | [1.07-1.17]   | illumina [7645193] (imputed) | N            | cervical carcinoma | GCST009825   |                 |
| 32 | 0      | 145023077   | intron_variant                     | 0               |         | 7.00E-08 | 7.15490196  | 1.06       | [1.04-1.09]   | illumina [7645193] (imputed) | N            | cervical carcinoma | GCST009825   |                 |
| 33 | 0      | 142979264   | splice_region_variant              | 0               |         | 6.00E-08 | 7.22184875  | 1.06       | [1.04-1.09]   | illumina [7645193] (imputed) | N            | cervical carcinoma | GCST009825   |                 |
| 34 | 0      | 78868683    | intron_variant                     | 0               |         | 3.00E-07 | 6.522878745 | 1.05       | [1.03-1.08]   | illumina [7645193] (imputed) | N            | cervical carcinoma | GCST009825   |                 |
| 35 | 0      | 2530710     | intergenic_variant                 | 1               |         | 4.00E-07 | 6.397940009 | 1.0416667  | [1.03-1.06]   | illumina [7645193] (imputed) | N            | cervical carcinoma | GCST009825   |                 |
| 36 | 0      | 117759870   | regulatory_region_variant          | 1               |         | 6.00E-08 | 7.22184875  | 1.06       | [1.04-1.09]   | illumina [7645193] (imputed) | N            | cervical carcinoma | GCST009825   |                 |
| 37 | 0      | 28752857    | intron_variant                     | 0               |         | 5.00E-08 | 7.301029996 | 1.06       | [1.04-1.08]   | illumina [7645193] (imputed) | N            | cervical carcinoma | GCST009825   |                 |
| 38 | 0      | 28399987    | 5_prime_UTR_variant                | 0               |         | 7.00E-08 | 7.15490196  | 1.06       | [1.04-1.09]   | illumina [7645193] (imputed) | N            | cervical carcinoma | GCST009825   |                 |
| 39 | 0      | 75393409    | synonymous_variant                 | 0               |         | 2.00E-07 | 6.698970004 | 1.06       | [1.04-1.09]   | illumina [7645193] (imputed) | N            | cervical carcinoma | GCST009825   |                 |
| 40 | 0      | 57079996    | intron_variant                     | 0               |         | 1.00E-07 | 7           | 1.06       | [1.04-1.09]   | illumina [7645193] (imputed) | N            | cervical carcinoma | GCST009825   |                 |
| 41 | 0      | 380911      | intergenic_variant                 | 1               |         | 9.00E-06 | 5.045757491 | 1.04       | [1.02-1.06]   | illumina [7645193] (imputed) | N            | cervical carcinoma | GCST009825   |                 |
| 42 | 0      | 36022506    | intron_variant                     | 1               |         | 2.00E-06 | 6.698970004 | 1.06       | [1.03-1.08]   | illumina [7645193] (imputed) | N            | cervical carcinoma | GCST009825   |                 |
| 43 | 0      | 113721192   | intergenic_variant                 | 1               |         | 1.00E-06 | 6           | 1.06       | [1.03-1.08]   | illumina [7645193] (imputed) | N            | cervical carcinoma | GCST009825   |                 |
| 44 | 0      | 117231810   | intergenic_variant                 | 1               |         | 4.00E-06 | 5.397940009 | 1.06       | [1.03-1.08]   | illumina [7645193] (imputed) | N            | cervical carcinoma | GCST009825   |                 |
| 45 | 0      | 910320      | regulatory_region_variant          | 1               |         | 8.00E-08 | 7.096910013 | 1.05       | [1.03-1.07]   | illumina [7645193] (imputed) | N            | cervical carcinoma | GCST009825   |                 |
| 46 | 0      | 9375182     | intergenic_variant                 | 1               |         | 3.00E-06 | 5.522878745 | 1.0309278  | [1.02-1.05]   | illumina [7645193] (imputed) | N            | cervical carcinoma | GCST009825   |                 |
| 47 | 0      | 10272208    | intron_variant                     | 0               |         | 5.00E-07 | 6.301029996 | 1.0309278  | [1.02-1.05]   | illumina [7645193] (imputed) | N            | cervical carcinoma | GCST009825   |                 |
| 48 | 0      | 147175877   | intron_variant                     | 0               |         | 6.00E-06 | 5.22184875  | 1.1        | [1.05-1.14]   | illumina [7645193] (imputed) | N            | cervical carcinoma | GCST009825   |                 |
| 49 | 0      | 149996974   | non_coding_transcript_exon_variant | 0               |         | 3.00E-06 | 5.522878745 | 1.14       | [1.08-1.21]   | illumina [7645193] (imputed) | N            | cervical carcinoma | GCST009825   |                 |
| 50 | 0      | 2090064     | intergenic_variant                 | 1               |         | 3.00E-07 | 6.522878745 | 1.0416667  | [1.02-1.05]   | illumina [7645193] (imputed) | N            | cervical carcinoma | GCST009825   |                 |
| 51 | 0      | 4077818     | intergenic_variant                 | 1               |         | 2.00E-06 | 5.698970004 | 1.04       | [1.02-1.06]   | illumina [7645193] (imputed) | N            | cervical carcinoma | GCST009825   |                 |
| 52 | 0      | 17784899    | intron_variant                     | 0               |         | 5.00E-07 | 6.301029996 | 1.05       | [1.03-1.07]   | illumina [7645193] (imputed) | N            | cervical carcinoma | GCST009825   |                 |
| 53 | 0      | 140330106   | intron_variant                     | 0               |         | 8.00E-06 | 5.096910013 | 1.1        | [1.06-1.15]   | illumina [7645193] (imputed) | N            | cervical carcinoma | GCST009825   |                 |
| 54 | 0      | 147380957   | intron_variant                     | 0               |         | 7.00E-06 | 5.15490196  | 1.07       | [1.04-1.10]   | illumina [7645193] (imputed) | N            | cervical carcinoma | GCST009825   |                 |
| 55 | 0      | 150806792   | intron_variant                     | 0               |         | 8.00E-08 | 7.096910013 | 1.19       | [1.12-1.26]   | illumina [7645193] (imputed) | N            | cervical carcinoma | GCST009825   |                 |
| 56 | 0      | 377042484   | intron_variant                     | 0               |         | 3.00E-06 | 5.522878745 | 1.12       | [1.07-1.17]   | illumina [7645193] (imputed) | N            | cervical carcinoma | GCST009825   |                 |
| 57 | 0      | 144335201   | regulatory_region_variant          | 1               |         | 3.00E-06 | 5.522878745 | 1.78       | [1.40-2.27]   | illumina [7645193] (imputed) | N            | cervical carcinoma | GCST009826   |                 |
| 58 | 0      | 79476506    | non_coding_transcript_exon_variant | 0               |         | 1.00E-06 | 6           | 1.79       | [1.41-2.26]   | illumina [7645193] (imputed) | N            | cervical carcinoma | GCST009826   |                 |
| 59 | 0      | 213237      | 5_prime_UTR_variant                | 0               |         | 7.00E-07 | 6.15490196  | 1.36       | [1.21-1.54]   | illumina [7645193] (imputed) | N            | cervical carcinoma | GCST009826   |                 |
| 60 | 0      | 77011267    | intergenic_variant                 | 1               |         | 1.00E-06 | 6           | 1.79       | [1.41-2.26]   | illumina [7645193] (imputed) | N            | cervical carcinoma | GCST009826   |                 |
| 61 | 0      | 138803712   | intron_variant                     | 0               |         | 2.00E-06 | 5.698970004 | 1.82       | [1.43-2.33]   | illumina [7645193] (imputed) | N            | cervical carcinoma | GCST009826   |                 |
| 62 | 0      | 141456208   | intergenic_variant                 | 1               |         | 4.00E-06 | 5.397940009 | 1.75       | [1.38-2.23]   | illumina [7645193] (imputed) | N            | cervical carcinoma | GCST009826   |                 |
| 63 | 0      | 3129795     | TF binding site variant            | 1               |         | 2.00E-06 | 5.698970004 | 1.6129031  | [1.32-1.96]   | illumina [7645193] (imputed) | N            | cervical carcinoma | GCST009826   |                 |



|     | I                                                              | J  | K        | L  | M         | N          |
|-----|----------------------------------------------------------------|----|----------|----|-----------|------------|
| 64  | 538 Japanese ancestry cases, 39,556 Japanese ancestry controls | NA | 6p22.1   | 6  | 29256134  | Intergenic |
| 65  | 538 Japanese ancestry cases, 39,556 Japanese ancestry controls | NA | 6p22.1   | 6  | 29641918  | Intergenic |
| 66  | 538 Japanese ancestry cases, 39,556 Japanese ancestry controls | NA | 6p22.1   | 6  | 29829266  | Intergenic |
| 67  | 538 Japanese ancestry cases, 39,556 Japanese ancestry controls | NA | 6p22.1   | 6  | 30075223  | Intergenic |
| 68  | 538 Japanese ancestry cases, 39,556 Japanese ancestry controls | NA | 6p21.33  | 6  | 30830500  | Intergenic |
| 69  | 538 Japanese ancestry cases, 39,556 Japanese ancestry controls | NA | 6p21.33  | 6  | 30972610  | Intergenic |
| 70  | 538 Japanese ancestry cases, 39,556 Japanese ancestry controls | NA | 6p21.33  | 6  | 31343518  | Intergenic |
| 71  | 538 Japanese ancestry cases, 39,556 Japanese ancestry controls | NA | 6p21.33  | 6  | 31562896  | Intergenic |
| 72  | 538 Japanese ancestry cases, 39,556 Japanese ancestry controls | NA | 6p21.33  | 6  | 31771721  | Intergenic |
| 73  | 538 Japanese ancestry cases, 39,556 Japanese ancestry controls | NA | 6p21.33  | 6  | 31972441  | Intergenic |
| 74  | 538 Japanese ancestry cases, 39,556 Japanese ancestry controls | NA | 6p21.33  | 6  | 32093562  | Intergenic |
| 75  | 538 Japanese ancestry cases, 39,556 Japanese ancestry controls | NA | 6p21.32  | 6  | 32241674  | Intergenic |
| 76  | 538 Japanese ancestry cases, 39,556 Japanese ancestry controls | NA | 6p21.32  | 6  | 32482186  | Intergenic |
| 77  | 538 Japanese ancestry cases, 39,556 Japanese ancestry controls | NA | 6p21.32  | 6  | 32714813  | Intergenic |
| 78  | 538 Japanese ancestry cases, 39,556 Japanese ancestry controls | NA | 6p21.32  | 6  | 32920459  | Intergenic |
| 79  | 538 Japanese ancestry cases, 39,556 Japanese ancestry controls | NA | 6p21.32  | 6  | 33108313  | Intergenic |
| 80  | 538 Japanese ancestry cases, 39,556 Japanese ancestry controls | NA | 6q22.31  | 6  | 122773922 | Intergenic |
| 81  | 538 Japanese ancestry cases, 39,556 Japanese ancestry controls | NA | 7q22.3   | 7  | 105691372 | Intergenic |
| 82  | 538 Japanese ancestry cases, 39,556 Japanese ancestry controls | NA | 6p21.33  | 6  | 30512137  | Intergenic |
| 83  | 538 Japanese ancestry cases, 39,556 Japanese ancestry controls | NA | 6p21.33  | 6  | 30719695  | Intergenic |
| 84  | 538 Japanese ancestry cases, 39,556 Japanese ancestry controls | NA | 11p15.5  | 11 | 2158112   | INS-IGF2   |
| 85  | 538 Japanese ancestry cases, 39,556 Japanese ancestry controls | NA | 17q24.3  | 17 | 72101710  | SOX9       |
| 86  | 538 Japanese ancestry cases, 39,556 Japanese ancestry controls | NA | 1q23.3   | 1  | 162498796 | Intergenic |
| 87  | 538 Japanese ancestry cases, 39,556 Japanese ancestry controls | NA | 1q23.3   | 1  | 162660256 | Intergenic |
| 88  | 538 Japanese ancestry cases, 39,556 Japanese ancestry controls | NA | 2p25.2   | 2  | 4581682   | Intergenic |
| 89  | 538 Japanese ancestry cases, 39,556 Japanese ancestry controls | NA | 2p16.3   | 2  | 50256810  | Intergenic |
| 90  | 538 Japanese ancestry cases, 39,556 Japanese ancestry controls | NA | 2p13.1   | 2  | 73416499  | Intergenic |
| 91  | 538 Japanese ancestry cases, 39,556 Japanese ancestry controls | NA | 2q12.1   | 2  | 105183335 | Intergenic |
| 92  | 538 Japanese ancestry cases, 39,556 Japanese ancestry controls | NA | 2q24.3   | 2  | 164262092 | Intergenic |
| 93  | 538 Japanese ancestry cases, 39,556 Japanese ancestry controls | NA | 2q32.1   | 2  | 185844965 | Intergenic |
| 94  | 538 Japanese ancestry cases, 39,556 Japanese ancestry controls | NA | 2q36.3   | 2  | 226586765 | Intergenic |
| 95  | 538 Japanese ancestry cases, 39,556 Japanese ancestry controls | NA |          |    |           | Intergenic |
| 96  | 538 Japanese ancestry cases, 39,556 Japanese ancestry controls | NA |          |    |           | Intergenic |
| 97  | 538 Japanese ancestry cases, 39,556 Japanese ancestry controls | NA | 3p12.2   | 3  | 81782913  | Intergenic |
| 98  | 538 Japanese ancestry cases, 39,556 Japanese ancestry controls | NA | 3q28     | 3  | 190245452 | Intergenic |
| 99  | 538 Japanese ancestry cases, 39,556 Japanese ancestry controls | NA | 4p16.3   | 4  | 2279800   | Intergenic |
| 100 | 538 Japanese ancestry cases, 39,556 Japanese ancestry controls | NA | 4q26     | 4  | 113726137 | Intergenic |
| 101 | 538 Japanese ancestry cases, 39,556 Japanese ancestry controls | NA | 4q31.22  | 4  | 146884350 | Intergenic |
| 102 | 538 Japanese ancestry cases, 39,556 Japanese ancestry controls | NA | 6p22.1   | 6  | 27685380  | Intergenic |
| 103 | 538 Japanese ancestry cases, 39,556 Japanese ancestry controls | NA | 20q13.33 | 20 | 64106159  | Intergenic |
| 104 | 538 Japanese ancestry cases, 39,556 Japanese ancestry controls | NA | 6p21.33  | 6  | 30512137  | Intergenic |
| 105 | 538 Japanese ancestry cases, 39,556 Japanese ancestry controls | NA | 6p21.33  | 6  | 30719695  | Intergenic |
| 106 | 538 Japanese ancestry cases, 39,556 Japanese ancestry controls | NA | 11p15.5  | 11 | 2158112   | INS-IGF2   |
| 107 | 538 Japanese ancestry cases, 39,556 Japanese ancestry controls | NA | 17q24.3  | 17 | 72101710  | SOX9       |
| 108 | 538 Japanese ancestry cases, 39,556 Japanese ancestry controls | NA | 1q23.1   | 1  | 157596180 | Intergenic |
| 109 | 538 Japanese ancestry cases, 39,556 Japanese ancestry controls | NA | 1q23.3   | 1  | 162660256 | Intergenic |
| 110 | 538 Japanese ancestry cases, 39,556 Japanese ancestry controls | NA | 2p25.2   | 2  | 4581682   | Intergenic |
| 111 | 538 Japanese ancestry cases, 39,556 Japanese ancestry controls | NA | 2p16.3   | 2  | 50256810  | Intergenic |
| 112 | 538 Japanese ancestry cases, 39,556 Japanese ancestry controls | NA | 2p13.1   | 2  | 73416499  | Intergenic |
| 113 | 538 Japanese ancestry cases, 39,556 Japanese ancestry controls | NA | 2q24.3   | 2  | 164262092 | Intergenic |
| 114 | 538 Japanese ancestry cases, 39,556 Japanese ancestry controls | NA | 2q32.1   | 2  | 185844965 | Intergenic |
| 115 | 538 Japanese ancestry cases, 39,556 Japanese ancestry controls | NA | 2q36.3   | 2  | 226586765 | Intergenic |
| 116 | 538 Japanese ancestry cases, 39,556 Japanese ancestry controls | NA | 3p25.1   | 3  | 13530464  | Intergenic |
| 117 | 538 Japanese ancestry cases, 39,556 Japanese ancestry controls | NA |          |    |           | Intergenic |
| 118 | 538 Japanese ancestry cases, 39,556 Japanese ancestry controls | NA | 3q28     | 3  | 190245452 | Intergenic |
| 119 | 538 Japanese ancestry cases, 39,556 Japanese ancestry controls | NA | 4p16.3   | 4  | 2279800   | Intergenic |
| 120 | 538 Japanese ancestry cases, 39,556 Japanese ancestry controls | NA | 4q26     | 4  | 113726137 | Intergenic |
| 121 | 538 Japanese ancestry cases, 39,556 Japanese ancestry controls | NA | 4q31.22  | 4  | 146884350 | Intergenic |
| 122 | 538 Japanese ancestry cases, 39,556 Japanese ancestry controls | NA | 6p22.1   | 6  | 28031037  | Intergenic |
| 123 | 538 Japanese ancestry cases, 39,556 Japanese ancestry controls | NA | 6p22.1   | 6  | 28137256  | Intergenic |
| 124 | 538 Japanese ancestry cases, 39,556 Japanese ancestry controls | NA | 6p22.1   | 6  | 28356161  | Intergenic |
| 125 | 538 Japanese ancestry cases, 39,556 Japanese ancestry controls | NA | 6p22.1   | 6  | 28499293  | Intergenic |
| 126 | 538 Japanese ancestry cases, 39,556 Japanese ancestry controls | NA | 6p22.1   | 6  | 28639807  | Intergenic |



|     | O                                                      | P               | Q               |
|-----|--------------------------------------------------------|-----------------|-----------------|
| 64  | AL672167.1                                             |                 |                 |
| 65  | SUMO2P1 - MOG                                          | ENSG00000228130 | ENSG00000236561 |
| 66  | HLA-G, HLA-G, HLA-G, HLA-G, HLA-G, HLA-G, HLA-G        |                 |                 |
| 67  | RNF39, RNF39, RNF39, RNF39, RNF39, RNF39, RNF39, RNF39 |                 |                 |
| 68  | LINC00243                                              |                 |                 |
| 69  | NAPGP2 - MUC21                                         | ENSG00000275906 | ENSG00000231350 |
| 70  | HLA-B, HLA-B, HLA-B, HLA-B, HLA-B, HLA-B               |                 |                 |
| 71  | NFKBIL1 - LTA                                          | ENSG00000206440 | ENSG00000226275 |
| 72  | VWA7, VWA7, VWA7, VWA7, VWA7, VWA7, VWA7               |                 |                 |
| 73  | STK19, STK19, STK19, STK19, STK19, STK19               |                 |                 |
| 74  | TNXB, TNXB, TNXB, TNXB, TNXB, TNXB                     |                 |                 |
| 75  | NOTCH4 - TSBP1-AS1                                     | ENSG00000206312 | ENSG00000235135 |
| 76  | HLA-DRB9 - HLA-DRB5                                    | ENSG00000226035 | ENSG00000198502 |
| 77  | MTCO3P1 - AL662789.1                                   | ENSG00000237145 | ENSG00000232080 |
| 78  | HLA-Z - HLA-DMB                                        | ENSG00000237871 | ENSG00000226264 |
| 79  | COL11A2P1 - HLA-DPB2                                   | ENSG00000230816 | ENSG00000225132 |
| 80  | RN7SL564P - FABP7                                      | ENSG00000240606 | ENSG00000164434 |
| 81  | ATXN7L1                                                |                 |                 |
| 82  | HLA-E - LINC02569                                      | ENSG00000206493 | ENSG00000235781 |
| 83  | MDC1 - TUBB                                            | ENSG00000206481 | ENSG00000229684 |
| 84  | INS-IGF2, AC132217.2                                   |                 |                 |
| 85  | LINC02097, SOX9-AS1                                    |                 |                 |
| 86  | UHMK1                                                  |                 |                 |
| 87  | DDR2                                                   |                 |                 |
| 88  | NPM1P48 - LINC01249                                    | ENSG00000231821 | ENSG00000231532 |
| 89  | NRXN1                                                  |                 |                 |
| 90  | ALMS1                                                  |                 |                 |
| 91  | LINC01918 - GPR45                                      | ENSG00000226508 | ENSG00000135973 |
| 92  | AC016766.1                                             |                 |                 |
| 93  | FSIP2 - AC097500.1                                     | ENSG00000188738 | ENSG00000287129 |
| 94  | AC062015.1 - MIR5702                                   | ENSG00000235070 | ENSG00000263363 |
| 95  |                                                        |                 |                 |
| 96  |                                                        |                 |                 |
| 97  | AC017015.2 - AC129807.1                                | ENSG00000242190 | ENSG00000242009 |
| 98  | NMNAT1P3 - CLDN1                                       | ENSG00000238077 | ENSG00000163347 |
| 99  | ZFYVE28                                                |                 |                 |
| 100 | CAMK2D                                                 |                 |                 |
| 101 | TTC29                                                  |                 |                 |
| 102 | AL009179.3 - AL009179.1                                | ENSG00000287674 | ENSG00000281706 |
| 103 | NPBWR2, MYT1                                           |                 |                 |
| 104 | HLA-E - LINC02569                                      | ENSG00000206493 | ENSG00000235781 |
| 105 | MDC1 - TUBB                                            | ENSG00000206481 | ENSG00000229684 |
| 106 | INS-IGF2, AC132217.2                                   |                 |                 |
| 107 | LINC02097, SOX9-AS1                                    |                 |                 |
| 108 | FCRL4                                                  |                 |                 |
| 109 | DDR2                                                   |                 |                 |
| 110 | NPM1P48 - LINC01249                                    | ENSG00000231821 | ENSG00000231532 |
| 111 | NRXN1                                                  |                 |                 |
| 112 | ALMS1                                                  |                 |                 |
| 113 | AC016766.1                                             |                 |                 |
| 114 | FSIP2 - AC097500.1                                     | ENSG00000188738 | ENSG00000287129 |
| 115 | AC062015.1 - MIR5702                                   | ENSG00000235070 | ENSG00000263363 |
| 116 | HDAC11 - FBLN2                                         | ENSG00000163517 | ENSG00000163520 |
| 117 |                                                        |                 |                 |
| 118 | NMNAT1P3 - CLDN1                                       | ENSG00000238077 | ENSG00000163347 |
| 119 | ZFYVE28                                                |                 |                 |
| 120 | CAMK2D                                                 |                 |                 |
| 121 | TTC29                                                  |                 |                 |
| 122 | ZSCAN16-AS1                                            |                 |                 |
| 123 | AL358933.1, ZSCAN16-AS1                                |                 |                 |
| 124 | ZKSCAN3, ZSCAN31                                       |                 |                 |
| 125 | Z98745.1 - GPX6                                        | ENSG00000286819 | ENSG00000198704 |
| 126 | AL121932.2                                             |                 |                 |

|     | R                                                                                                                                      | S      | T      | U               | V             |
|-----|----------------------------------------------------------------------------------------------------------------------------------------|--------|--------|-----------------|---------------|
| 64  | ENSG00000197171                                                                                                                        |        |        | rs149016863-?   | rs149016863   |
| 65  |                                                                                                                                        | 5575   | 15084  | rs9257927-?     | rs9257927     |
| 66  | ENSG00000206506, ENSG00000233095, ENSG00000237216, ENSG00000276051, ENSG00000204632, ENSG00000230413, ENSG00000235346, ENSG00000235680 |        |        | rs145023077-?   | rs145023077   |
| 67  | ENSG00000235022, ENSG00000237733, ENSG00000230467, ENSG00000227171, ENSG00000206500, ENSG00000236967, ENSG00000230332, ENSG00000204618 |        |        | rs142979264-?   | rs142979264   |
| 68  | ENSG00000214894                                                                                                                        |        |        | rs78868683-?    | rs78868683    |
| 69  |                                                                                                                                        | 10214  | 11108  | rs2530710-?     | rs2530710     |
| 70  | ENSG00000228964, ENSG00000223532, ENSG00000234745, ENSG00000232126, ENSG00000224608, ENSG00000206450                                   |        |        | rs28380833-?    | rs28380833    |
| 71  |                                                                                                                                        | 4067   | 9158   | rs138885312-?   | rs138885312   |
| 72  | ENSG00000238203, ENSG00000230048, ENSG00000204396, ENSG00000223757, ENSG00000234433, ENSG00000227144                                   |        |        | rs143029752-?   | rs143029752   |
| 73  | ENSG00000234947, ENSG00000226257, ENSG00000204344, ENSG00000206342, ENSG00000236250, ENSG00000226033                                   |        |        | rs75393409-?    | rs75393409    |
| 74  | ENSG00000168477, ENSG00000236236, ENSG00000206258, ENSG00000229353, ENSG00000233323, ENSG00000231608                                   |        |        | rs57079996-?    | rs57079996    |
| 75  |                                                                                                                                        | 17607  | 12966  | rs380911-?      | rs380911      |
| 76  |                                                                                                                                        | 8686   | 35167  | rs367607265-?   | rs367607265   |
| 77  |                                                                                                                                        | 7858   | 3192   | rs113721192-?   | rs113721192   |
| 78  |                                                                                                                                        | 23969  | 14170  | rs117231810-?   | rs117231810   |
| 79  |                                                                                                                                        | 983    | 4138   | rs872956-?      | rs872956      |
| 80  |                                                                                                                                        | 28393  | 5794   | rs9375182-?     | rs9375182     |
| 81  | ENSG00000146776                                                                                                                        |        |        | rs10272208-?    | rs10272208    |
| 82  |                                                                                                                                        | 17943  | 4129   | rs140668832-?   | rs140668832   |
| 83  |                                                                                                                                        | 2248   | 657    | rs117670375-?   | rs117670375   |
| 84  | ENSG00000129965, ENSG00000284779                                                                                                       |        |        | rs150806792-?   | rs150806792   |
| 85  | ENSG00000226101, ENSG00000234899                                                                                                       |        |        | rs140991990-?   | rs140991990   |
| 86  | ENSG00000152332                                                                                                                        |        |        | rs57561731-?    | rs57561731    |
| 87  | ENSG00000162733                                                                                                                        |        |        | rs75068199-?    | rs75068199    |
| 88  |                                                                                                                                        | 66626  | 46534  | rs76883373-?    | rs76883373    |
| 89  | ENSG00000179915                                                                                                                        |        |        | rs62133116-?    | rs62133116    |
| 90  | ENSG00000116127                                                                                                                        |        |        | rs11684858-?    | rs11684858    |
| 91  |                                                                                                                                        | 37911  | 58408  | rs2679850-?     | rs2679850     |
| 92  | ENSG00000237844                                                                                                                        |        |        | rs190074712-?   | rs190074712   |
| 93  |                                                                                                                                        | 11675  | 105504 | rs183319101-?   | rs183319101   |
| 94  |                                                                                                                                        | 401394 | 71945  | rs559021322-?   | rs559021322   |
| 95  |                                                                                                                                        |        |        | chr3:59760625-? | chr3:59760625 |
| 96  |                                                                                                                                        |        |        | chr3:59866982-? | chr3:59866982 |
| 97  |                                                                                                                                        | 18157  | 57601  | rs76537691-?    | rs76537691    |
| 98  |                                                                                                                                        | 77801  | 60255  | rs117143670-?   | rs117143670   |
| 99  | ENSG00000159733                                                                                                                        |        |        | rs556607390-?   | rs556607390   |
| 100 | ENSG00000145349                                                                                                                        |        |        | rs146513397-?   | rs146513397   |
| 101 | ENSG00000137473                                                                                                                        |        |        | rs185348880-?   | rs185348880   |
| 102 |                                                                                                                                        | 4825   | 8655   | rs77050118-?    | rs77050118    |
| 103 | ENSG00000125522, ENSG00000196132                                                                                                       |        |        | rs75874947-?    | rs75874947    |
| 104 |                                                                                                                                        | 17943  | 4129   | rs140668832-?   | rs140668832   |
| 105 |                                                                                                                                        | 2248   | 657    | rs117670375-?   | rs117670375   |
| 106 | ENSG00000129965, ENSG00000284779                                                                                                       |        |        | rs150806792-?   | rs150806792   |
| 107 | ENSG00000226101, ENSG00000234899                                                                                                       |        |        | rs140991990-?   | rs140991990   |
| 108 | ENSG00000163518                                                                                                                        |        |        | rs1885560-?     | rs1885560     |
| 109 | ENSG00000162733                                                                                                                        |        |        | rs75068199-?    | rs75068199    |
| 110 |                                                                                                                                        | 66626  | 46534  | rs76883373-?    | rs76883373    |
| 111 | ENSG00000179915                                                                                                                        |        |        | rs62133116-?    | rs62133116    |
| 112 | ENSG00000116127                                                                                                                        |        |        | rs11684858-?    | rs11684858    |
| 113 | ENSG00000237844                                                                                                                        |        |        | rs190074712-?   | rs190074712   |
| 114 |                                                                                                                                        | 11675  | 105504 | rs183319101-?   | rs183319101   |
| 115 |                                                                                                                                        | 401394 | 71945  | rs559021322-?   | rs559021322   |
| 116 |                                                                                                                                        | 24040  | 18661  | rs59692692-?    | rs59692692    |
| 117 |                                                                                                                                        |        |        | chr3:59866982-? | chr3:59866982 |
| 118 |                                                                                                                                        | 77801  | 60255  | rs117143670-?   | rs117143670   |
| 119 | ENSG00000159733                                                                                                                        |        |        | rs556607390-?   | rs556607390   |
| 120 | ENSG00000145349                                                                                                                        |        |        | rs146513397-?   | rs146513397   |
| 121 | ENSG00000137473                                                                                                                        |        |        | rs185348880-?   | rs185348880   |
| 122 | ENSG00000269293                                                                                                                        |        |        | rs74994185-?    | rs74994185    |
| 123 | ENSG00000261839, ENSG00000269293                                                                                                       |        |        | rs79476506-?    | rs79476506    |
| 124 | ENSG00000189298, ENSG00000235109                                                                                                       |        |        | rs213237-?      | rs213237      |
| 125 |                                                                                                                                        | 7632   | 4003   | rs146362527-?   | rs146362527   |
| 126 | ENSG00000287279                                                                                                                        |        |        | rs138803712-?   | rs138803712   |

|     | W | X         | Y                                  | Z | AA | AB       | AC          | AD          | AE          | AF                           | AG | AH                 | AI         | AJ |
|-----|---|-----------|------------------------------------|---|----|----------|-------------|-------------|-------------|------------------------------|----|--------------------|------------|----|
| 64  | 0 | 149016863 | intron_variant                     | 0 |    | 3.00E-06 | 5.222878745 | 1.74        | [1.38-2.20] | Illumina [7645193] (imputed) | N  | cervical carcinoma | GCST009826 |    |
| 65  | 0 | 9257927   | regulatory_region_variant          | 1 |    | 1.00E-08 | 8           | 1.66        | [1.39-1.97] | Illumina [7645193] (imputed) | N  | cervical carcinoma | GCST009826 |    |
| 66  | 0 | 145023077 | intron_variant                     | 0 |    | 8.00E-09 | 8.096910013 | 1.83        | [1.49-2.25] | Illumina [7645193] (imputed) | N  | cervical carcinoma | GCST009826 |    |
| 67  | 0 | 142979264 | splice_region_variant              | 0 |    | 7.00E-09 | 8.15490196  | 1.84        | [1.50-2.26] | Illumina [7645193] (imputed) | N  | cervical carcinoma | GCST009826 |    |
| 68  | 0 | 78868683  | intron_variant                     | 0 |    | 1.00E-07 | 7           | 1.68        | [1.39-2.04] | Illumina [7645193] (imputed) | N  | cervical carcinoma | GCST009826 |    |
| 69  | 0 | 2530710   | intergenic_variant                 | 1 |    | 1.00E-07 | 7           | 1.515151515 | [1.3-1.75]  | Illumina [7645193] (imputed) | N  | cervical carcinoma | GCST009826 |    |
| 70  | 0 | 28380833  | intron_variant                     | 0 |    | 8.00E-09 | 8.096910013 | 1.8         | [1.47-2.20] | Illumina [7645193] (imputed) | N  | cervical carcinoma | GCST009826 |    |
| 71  | 0 | 138885312 | intergenic_variant                 | 1 |    | 2.00E-08 | 7.698970004 | 1.8         | [1.47-2.20] | Illumina [7645193] (imputed) | N  | cervical carcinoma | GCST009826 |    |
| 72  | 0 | 143029752 | non_coding_transcript_exon_variant | 0 |    | 3.00E-08 | 7.522878745 | 1.78        | [1.45-2.19] | Illumina [7645193] (imputed) | N  | cervical carcinoma | GCST009826 |    |
| 73  | 0 | 75393409  | synonymous_variant                 | 0 |    | 4.00E-08 | 7.397940009 | 1.78        | [1.45-2.18] | Illumina [7645193] (imputed) | N  | cervical carcinoma | GCST009826 |    |
| 74  | 0 | 57079996  | intron_variant                     | 0 |    | 4.00E-08 | 7.397940009 | 1.77        | [1.45-2.18] | Illumina [7645193] (imputed) | N  | cervical carcinoma | GCST009826 |    |
| 75  | 0 | 380911    | intergenic_variant                 | 1 |    | 3.00E-06 | 5.522878745 | 1.51        | [1.27-1.80] | Illumina [7645193] (imputed) | N  | cervical carcinoma | GCST009826 |    |
| 76  | 0 | 367607265 | regulatory_region_variant          | 1 |    | 2.00E-07 | 6.698970004 | 1.74        | [1.41-2.14] | Illumina [7645193] (imputed) | N  | cervical carcinoma | GCST009826 |    |
| 77  | 0 | 113721192 | intergenic_variant                 | 1 |    | 3.00E-07 | 6.522878745 | 1.76        | [1.42-2.18] | Illumina [7645193] (imputed) | N  | cervical carcinoma | GCST009826 |    |
| 78  | 0 | 117231810 | intergenic_variant                 | 1 |    | 1.00E-06 | 6           | 1.69        | [1.37-2.09] | Illumina [7645193] (imputed) | N  | cervical carcinoma | GCST009826 |    |
| 79  | 0 | 872956    | regulatory_region_variant          | 1 |    | 8.00E-08 | 7.096910013 | 1.58        | [1.34-1.86] | Illumina [7645193] (imputed) | N  | cervical carcinoma | GCST009826 |    |
| 80  | 0 | 9375182   | intergenic_variant                 | 1 |    | 3.00E-06 | 5.522878745 | 1.3513513   | [1.19-1.54] | Illumina [7645193] (imputed) | N  | cervical carcinoma | GCST009826 |    |
| 81  | 0 | 10272208  | intron_variant                     | 0 |    | 2.00E-06 | 5.698970004 | 1.3333333   | [1.19-1.52] | Illumina [7645193] (imputed) | N  | cervical carcinoma | GCST009826 |    |
| 82  | 0 | 140668832 | intergenic_variant                 | 1 |    | 3.00E-10 | 9.522878745 | 1.92        | [1.57-2.35] | Illumina [7645193] (imputed) | N  | cervical carcinoma | GCST009826 |    |
| 83  | 0 | 117670375 | regulatory_region_variant          | 1 |    | 3.00E-10 | 9.522878745 | 1.92        | [1.57-2.35] | Illumina [7645193] (imputed) | N  | cervical carcinoma | GCST009826 |    |
| 84  | 0 | 150806792 | intron_variant                     | 0 |    | 5.00E-08 | 7.301029996 | 4.96        | [2.79-8.83] | Illumina [7645193] (imputed) | N  | cervical carcinoma | GCST009826 |    |
| 85  | 0 | 140991990 | intron_variant                     | 0 |    | 3.00E-08 | 7.522878745 | 4.94        | [2.80-8.71] | Illumina [7645193] (imputed) | N  | cervical carcinoma | GCST009826 |    |
| 86  | 0 | 57561731  | intron_variant                     | 0 |    | 9.00E-06 | 5.045757491 | 1.7         | [1.34-2.14] | Illumina [7645193] (imputed) | N  | cervical carcinoma | GCST009826 |    |
| 87  | 0 | 75068199  | intron_variant                     | 0 |    | 4.00E-07 | 6.397940009 | 1.82        | [1.44-2.30] | Illumina [7645193] (imputed) | N  | cervical carcinoma | GCST009826 |    |
| 88  | 0 | 76883373  | intergenic_variant                 | 1 |    | 8.00E-06 | 5.096910013 | 1.97        | [1.46-2.65] | Illumina [7645193] (imputed) | N  | cervical carcinoma | GCST009826 |    |
| 89  | 0 | 62133116  | intron_variant                     | 0 |    | 2.00E-06 | 5.698970004 | 1.48        | [1.26-1.74] | Illumina [7645193] (imputed) | N  | cervical carcinoma | GCST009826 |    |
| 90  | 0 | 11684858  | intron_variant                     | 0 |    | 7.00E-06 | 5.15490196  | 1.79        | [1.39-2.30] | Illumina [7645193] (imputed) | N  | cervical carcinoma | GCST009826 |    |
| 91  | 0 | 2679850   | intergenic_variant                 | 1 |    | 4.00E-06 | 5.397940009 | 2.2222223   | [1.59-3.12] | Illumina [7645193] (imputed) | N  | cervical carcinoma | GCST009826 |    |
| 92  | 0 | 190074712 | intron_variant                     | 0 |    | 3.00E-07 | 6.522878745 | 4.68        | [2.60-8.43] | Illumina [7645193] (imputed) | N  | cervical carcinoma | GCST009826 |    |
| 93  | 0 | 183319101 | intergenic_variant                 | 1 |    | 8.00E-06 | 5.096910013 | 1.3333333   | [1.18-1.52] | Illumina [7645193] (imputed) | N  | cervical carcinoma | GCST009826 |    |
| 94  | 0 | 559021322 | intergenic_variant                 | 1 |    | 2.00E-06 | 5.698970004 | 3.63        | [2.14-6.17] | Illumina [7645193] (imputed) | N  | cervical carcinoma | GCST009826 |    |
| 95  | 0 |           |                                    | 1 |    | 3.00E-06 | 5.522878745 | 4.15        | [2.28-7.58] | Illumina [7645193] (imputed) | N  | cervical carcinoma | GCST009826 |    |
| 96  | 0 |           |                                    | 1 |    | 5.00E-07 | 6.301029996 | 4.98        | [2.67-9.30] | Illumina [7645193] (imputed) | N  | cervical carcinoma | GCST009826 |    |
| 97  | 0 | 76537691  | regulatory_region_variant          | 1 |    | 8.00E-06 | 5.096910013 | 2.81        | [1.78-4.43] | Illumina [7645193] (imputed) | N  | cervical carcinoma | GCST009826 |    |
| 98  | 0 | 117143670 | intergenic_variant                 | 1 |    | 5.00E-06 | 5.301029996 | 3.45        | [2.03-5.86] | Illumina [7645193] (imputed) | N  | cervical carcinoma | GCST009826 |    |
| 99  | 0 | 556607390 | intron_variant                     | 0 |    | 6.00E-06 | 5.22184875  | 2.25        | [1.58-3.21] | Illumina [7645193] (imputed) | N  | cervical carcinoma | GCST009826 |    |
| 100 | 0 | 146513397 | intron_variant                     | 0 |    | 7.00E-07 | 6.15490196  | 3.95        | [2.30-6.79] | Illumina [7645193] (imputed) | N  | cervical carcinoma | GCST009826 |    |
| 101 | 0 | 185348880 | intron_variant                     | 0 |    | 8.00E-07 | 6.096910013 | 3.42        | [2.10-5.57] | Illumina [7645193] (imputed) | N  | cervical carcinoma | GCST009826 |    |
| 102 | 0 | 77050118  | intergenic_variant                 | 1 |    | 3.00E-06 | 5.522878745 | 1.79        | [1.40-2.28] | Illumina [7645193] (imputed) | N  | cervical carcinoma | GCST009826 |    |
| 103 | 0 | 75874947  | missense_variant                   | 0 |    | 1.00E-07 | 7           | 2.84        | [1.93-4.19] | Illumina [7645193] (imputed) | N  | cervical carcinoma | GCST009826 |    |
| 104 | 0 | 140668832 | intergenic_variant                 | 1 |    | 2.00E-09 | 8.698970004 | 1.07        | [1.05-1.09] | Illumina [7645193] (imputed) | N  | cervical carcinoma | GCST009825 |    |
| 105 | 0 | 117670375 | regulatory_region_variant          | 1 |    | 2.00E-09 | 8.698970004 | 1.07        | [1.05-1.09] | Illumina [7645193] (imputed) | N  | cervical carcinoma | GCST009825 |    |
| 106 | 0 | 150806792 | intron_variant                     | 0 |    | 8.00E-08 | 7.096910013 | 1.19        | [1.12-1.26] | Illumina [7645193] (imputed) | N  | cervical carcinoma | GCST009825 |    |
| 107 | 0 | 140991990 | intron_variant                     | 0 |    | 7.00E-08 | 7.15490196  | 1.16        | [1.10-1.23] | Illumina [7645193] (imputed) | N  | cervical carcinoma | GCST009825 |    |
| 108 | 0 | 1885560   | intron_variant                     | 0 |    | 6.00E-06 | 5.22184875  | 1.0526316   | [1.03-1.09] | Illumina [7645193] (imputed) | N  | cervical carcinoma | GCST009825 |    |
| 109 | 0 | 75068199  | intron_variant                     | 0 |    | 4.00E-07 | 6.397940009 | 1.07        | [1.04-1.10] | Illumina [7645193] (imputed) | N  | cervical carcinoma | GCST009825 |    |
| 110 | 0 | 76883373  | intergenic_variant                 | 1 |    | 5.00E-06 | 5.301029996 | 1.07        | [1.04-1.10] | Illumina [7645193] (imputed) | N  | cervical carcinoma | GCST009825 |    |
| 111 | 0 | 62133116  | intron_variant                     | 0 |    | 2.00E-06 | 5.698970004 | 1.05        | [1.03-1.07] | Illumina [7645193] (imputed) | N  | cervical carcinoma | GCST009825 |    |
| 112 | 0 | 11684858  | intron_variant                     | 0 |    | 4.00E-06 | 5.397940009 | 1.06        | [1.03-1.09] | Illumina [7645193] (imputed) | N  | cervical carcinoma | GCST009825 |    |
| 113 | 0 | 190074712 | intron_variant                     | 0 |    | 2.00E-06 | 5.698970004 | 1.17        | [1.10-1.25] | Illumina [7645193] (imputed) | N  | cervical carcinoma | GCST009825 |    |
| 114 | 0 | 183319101 | intergenic_variant                 | 1 |    | 6.00E-06 | 5.22184875  | 1.0309278   | [1.02-1.05] | Illumina [7645193] (imputed) | N  | cervical carcinoma | GCST009825 |    |
| 115 | 0 | 559021322 | intergenic_variant                 | 1 |    | 4.00E-06 | 5.397940009 | 1.13        | [1.07-1.19] | Illumina [7645193] (imputed) | N  | cervical carcinoma | GCST009825 |    |
| 116 | 0 | 59692692  | intergenic_variant                 | 1 |    | 6.00E-06 | 5.22184875  | 1.06        | [1.03-1.09] | Illumina [7645193] (imputed) | N  | cervical carcinoma | GCST009825 |    |
| 117 | 0 |           |                                    | 1 |    | 3.00E-06 | 5.522878745 | 1.16        | [1.09-1.24] | Illumina [7645193] (imputed) | N  | cervical carcinoma | GCST009825 |    |
| 118 | 0 | 117143670 | intergenic_variant                 | 1 |    | 7.00E-06 | 5.15490196  | 1.13        | [1.07-1.20] | Illumina [7645193] (imputed) | N  | cervical carcinoma | GCST009825 |    |
| 119 | 0 | 556607390 | intron_variant                     | 0 |    | 3.00E-06 | 5.522878745 | 1.1         | [1.05-1.14] | Illumina [7645193] (imputed) | N  | cervical carcinoma | GCST009825 |    |
| 120 | 0 | 146513397 | intron_variant                     | 0 |    | 1.00E-06 | 6           | 1.16        | [1.09-1.23] | Illumina [7645193] (imputed) | N  | cervical carcinoma | GCST009825 |    |
| 121 | 0 | 185348880 | intron_variant                     | 0 |    | 6.00E-06 | 5.22184875  | 1.13        | [1.07-1.19] | Illumina [7645193] (imputed) | N  | cervical carcinoma | GCST009825 |    |
| 122 | 0 | 74994185  | intron_variant                     | 0 |    | 6.00E-06 | 5.22184875  | 1.06        | [1.04-1.09] | Illumina [7645193] (imputed) | N  | cervical carcinoma | GCST009825 |    |
| 123 | 0 | 79476506  | non_coding_transcript_exon_variant | 0 |    | 7.00E-06 | 5.15490196  | 1.06        | [1.03-1.09] | Illumina [7645193] (imputed) | N  | cervical carcinoma | GCST009825 |    |
| 124 | 0 | 213237    | 5_prime_UTR_variant                | 0 |    | 2.00E-06 | 5.698970004 | 1.03        | [1.02-1.05] | Illumina [7645193] (imputed) | N  | cervical carcinoma | GCST009825 |    |
| 125 | 0 | 146362527 | intergenic_variant                 | 1 |    | 7.00E-06 | 5.15490196  | 1.06        | [1.03-1.09] | Illumina [7645193] (imputed) | N  | cervical carcinoma | GCST009825 |    |
| 126 | 0 | 138803712 | intron_variant                     | 0 |    | 8.00E-06 | 5.096910013 | 1.06        | [1.03-1.09] | Illumina [7645193] (imputed) | N  | cervical carcinoma | GCST009825 |    |



|     | I                                                                                                                                                                                     | J                                                                                                                                                                                      | K        | L  | M         | N                      |
|-----|---------------------------------------------------------------------------------------------------------------------------------------------------------------------------------------|----------------------------------------------------------------------------------------------------------------------------------------------------------------------------------------|----------|----|-----------|------------------------|
| 127 | 538 Japanese ancestry cases, 39,556 Japanese ancestry controls                                                                                                                        | NA                                                                                                                                                                                     | 6p22.1   | 6  | 29016978  | Intergenic             |
| 128 | 538 Japanese ancestry cases, 39,556 Japanese ancestry controls                                                                                                                        | NA                                                                                                                                                                                     | 7q33     | 7  | 133504366 | Intergenic             |
| 129 | 538 Japanese ancestry cases, 39,556 Japanese ancestry controls                                                                                                                        | NA                                                                                                                                                                                     | 7q33     | 7  | 133732785 | Intergenic             |
| 130 | 538 Japanese ancestry cases, 39,556 Japanese ancestry controls                                                                                                                        | NA                                                                                                                                                                                     | 7q33     | 7  | 133922241 | Intergenic             |
| 131 | 538 Japanese ancestry cases, 39,556 Japanese ancestry controls                                                                                                                        | NA                                                                                                                                                                                     | 8p23.1   | 8  | 9854826   | Intergenic             |
| 132 | 538 Japanese ancestry cases, 39,556 Japanese ancestry controls                                                                                                                        | NA                                                                                                                                                                                     | 8q12.1   | 8  | 56246637  | Intergenic             |
| 133 | 538 Japanese ancestry cases, 39,556 Japanese ancestry controls                                                                                                                        | NA                                                                                                                                                                                     | 8q12.1   | 8  | 59197008  | Intergenic             |
| 134 | 538 Japanese ancestry cases, 39,556 Japanese ancestry controls                                                                                                                        | NA                                                                                                                                                                                     |          |    |           | Intergenic             |
| 135 | 538 Japanese ancestry cases, 39,556 Japanese ancestry controls                                                                                                                        | NA                                                                                                                                                                                     | 9q21.2   | 9  | 76775287  | Intergenic             |
| 136 | 538 Japanese ancestry cases, 39,556 Japanese ancestry controls                                                                                                                        | NA                                                                                                                                                                                     | 10p13    | 10 | 17199011  | Intergenic             |
| 137 | 538 Japanese ancestry cases, 39,556 Japanese ancestry controls                                                                                                                        | NA                                                                                                                                                                                     | 11p15.5  | 11 | 2158112   | Intergenic             |
| 138 | 538 Japanese ancestry cases, 39,556 Japanese ancestry controls                                                                                                                        | NA                                                                                                                                                                                     | 11q12.1  | 11 | 58366737  | Intergenic             |
| 139 | 538 Japanese ancestry cases, 39,556 Japanese ancestry controls                                                                                                                        | NA                                                                                                                                                                                     | 12p11.22 | 12 | 29599423  | Intergenic             |
| 140 | 538 Japanese ancestry cases, 39,556 Japanese ancestry controls                                                                                                                        | NA                                                                                                                                                                                     | 12q24.23 | 12 | 119604245 | Intergenic             |
| 141 | 538 Japanese ancestry cases, 39,556 Japanese ancestry controls                                                                                                                        | NA                                                                                                                                                                                     | 13q12.11 | 13 | 22100187  | Intergenic             |
| 142 | 538 Japanese ancestry cases, 39,556 Japanese ancestry controls                                                                                                                        | NA                                                                                                                                                                                     | 13q33.3  | 13 | 106422664 | Intergenic             |
| 143 | 538 Japanese ancestry cases, 39,556 Japanese ancestry controls                                                                                                                        | NA                                                                                                                                                                                     | 14q11.2  | 14 | 20259308  | Intergenic             |
| 144 | 538 Japanese ancestry cases, 39,556 Japanese ancestry controls                                                                                                                        | NA                                                                                                                                                                                     | 14q11.2  | 14 | 20368118  | Intergenic             |
| 145 | 538 Japanese ancestry cases, 39,556 Japanese ancestry controls                                                                                                                        | NA                                                                                                                                                                                     | 14q21.1  | 14 | 41755191  | Intergenic             |
| 146 | 538 Japanese ancestry cases, 39,556 Japanese ancestry controls                                                                                                                        | NA                                                                                                                                                                                     | 14q32.31 | 14 | 101059844 | Intergenic             |
| 147 | 538 Japanese ancestry cases, 39,556 Japanese ancestry controls                                                                                                                        | NA                                                                                                                                                                                     | 16p13.3  | 16 | 6687493   | Intergenic             |
| 148 | 538 Japanese ancestry cases, 39,556 Japanese ancestry controls                                                                                                                        | NA                                                                                                                                                                                     | 17q24.3  | 17 | 72101710  | Intergenic             |
| 149 | 538 Japanese ancestry cases, 39,556 Japanese ancestry controls                                                                                                                        | NA                                                                                                                                                                                     | 19q13.32 | 19 | 45666590  | Intergenic             |
| 150 | 538 Japanese ancestry cases, 39,556 Japanese ancestry controls                                                                                                                        | NA                                                                                                                                                                                     | 19q13.41 | 19 | 51734303  | Intergenic             |
| 151 | 538 Japanese ancestry cases, 39,556 Japanese ancestry controls                                                                                                                        | NA                                                                                                                                                                                     | 20p13    | 20 | 4817030   | Intergenic             |
| 152 | 538 Japanese ancestry cases, 39,556 Japanese ancestry controls                                                                                                                        | NA                                                                                                                                                                                     | 20q13.32 | 20 | 58375898  | Intergenic             |
| 153 | 2,609 East Asian ancestry cases, 4,712 East Asian ancestry controls                                                                                                                   | 1,461 Han Chinese ancestry cases, 3,295 Han Chinese ancestry controls                                                                                                                  | 2p11.2   | 2  | 85219363  | NR                     |
| 154 | 2,609 East Asian ancestry cases, 4,712 East Asian ancestry controls                                                                                                                   | 1,461 Han Chinese ancestry cases, 3,295 Han Chinese ancestry controls                                                                                                                  | 5q14.3   | 5  | 91087644  | ADGRV1                 |
| 155 | 2,609 East Asian ancestry cases, 4,712 East Asian ancestry controls                                                                                                                   | 1,461 Han Chinese ancestry cases, 3,295 Han Chinese ancestry controls                                                                                                                  | 7p11.2   | 7  | 54380269  | HPVC1, LINC01445, VST1 |
| 156 | 2,609 East Asian ancestry cases, 4,712 East Asian ancestry controls                                                                                                                   | 1,461 Han Chinese ancestry cases, 3,295 Han Chinese ancestry controls                                                                                                                  | 6p21.32  | 6  | 33143124  | NR                     |
| 157 | 2,609 East Asian ancestry cases, 4,712 East Asian ancestry controls                                                                                                                   | 1,461 Han Chinese ancestry cases, 3,295 Han Chinese ancestry controls                                                                                                                  | 17q21.1  | 17 | 39895095  |                        |
| 158 | 1,553 Swedish ancestry cervical intraepithelial neoplasia grade 3 cases                                                                                                               | 827 Swedish ancestry cervical intraepithelial neoplasia grade 3 cases                                                                                                                  | 6p21.32  | 6  | 32616804  | intergenic             |
| 159 | 2,866 European ancestry cases, 6,481 European ancestry controls                                                                                                                       | NA                                                                                                                                                                                     | 6p21.33  | 6  | 31512891  | MICB, MCCD1            |
| 160 | 2,866 European ancestry cases, 6,481 European ancestry controls                                                                                                                       | NA                                                                                                                                                                                     | 4p12     | 4  | 47087167  | GABRB1                 |
| 161 | 2,866 European ancestry cases, 6,481 European ancestry controls                                                                                                                       | NA                                                                                                                                                                                     | 7q34     | 7  | 139841136 | TBXAS1                 |
| 162 | 2,866 European ancestry cases, 6,481 European ancestry controls                                                                                                                       | NA                                                                                                                                                                                     | 8p23.1   | 8  | 8523519   | SGK223, CLDN23         |
| 163 | 2,866 European ancestry cases, 6,481 European ancestry controls                                                                                                                       | NA                                                                                                                                                                                     | 8q13.3   | 8  | 69663895  | SULF1, SLCO5A1         |
| 164 | 2,866 European ancestry cases, 6,481 European ancestry controls                                                                                                                       | NA                                                                                                                                                                                     | 13q14.11 | 13 | 40927414  | SUGT1P3, ELF1          |
| 165 | 2,866 European ancestry cases, 6,481 European ancestry controls                                                                                                                       | NA                                                                                                                                                                                     | 15q26.3  | 15 | 99451803  | LRRC28, MEF2A          |
| 166 | 2,866 European ancestry cases, 6,481 European ancestry controls                                                                                                                       | NA                                                                                                                                                                                     | 18q22.3  | 18 | 73596115  | LOC100505817, FBXO15   |
| 167 | 2,866 European ancestry cases, 6,481 European ancestry controls                                                                                                                       | NA                                                                                                                                                                                     | 6p21.33  | 6  | 31572364  | TNF                    |
| 168 | 2,866 European ancestry cases, 6,481 European ancestry controls                                                                                                                       | NA                                                                                                                                                                                     | 6p21.32  | 6  | 32633026  | HLA-DRB1               |
| 169 | 2,866 European ancestry cases, 6,481 European ancestry controls                                                                                                                       | NA                                                                                                                                                                                     |          |    |           | HLA-DQB1, HLA-DRB1,    |
| 170 | 2,866 European ancestry cases, 6,481 European ancestry controls                                                                                                                       | NA                                                                                                                                                                                     |          |    |           | HLA-DQA1, HLA-DRB1     |
| 171 | 2,866 European ancestry cases, 6,481 European ancestry controls                                                                                                                       | NA                                                                                                                                                                                     |          |    |           | HLA-B, HLA-C           |
| 172 | 2,866 European ancestry cases, 6,481 European ancestry controls                                                                                                                       | NA                                                                                                                                                                                     |          |    |           | HLA-DRB1, HLA-DQB1,    |
| 173 | 66 Han Chinese ancestry non-responder cases, 160 Han Chinese ancestry non-responder cases, 291 Han Chinese ancestry non-responder cases, 291 Han Chinese ancestry non-responder cases | 160 Han Chinese ancestry non-responder cases, 291 Han Chinese ancestry non-responder cases, 291 Han Chinese ancestry non-responder cases, 291 Han Chinese ancestry non-responder cases | 4q34.3   | 4  | 179391655 | intergenic             |
| 174 | 66 Han Chinese ancestry non-responder cases, 160 Han Chinese ancestry non-responder cases, 291 Han Chinese ancestry non-responder cases, 291 Han Chinese ancestry non-responder cases | 160 Han Chinese ancestry non-responder cases, 291 Han Chinese ancestry non-responder cases, 291 Han Chinese ancestry non-responder cases, 291 Han Chinese ancestry non-responder cases | 14q32.11 | 14 | 90698719  | CALM1, TTC7B, NRDE2    |
| 175 | 66 Han Chinese ancestry non-responder cases, 160 Han Chinese ancestry non-responder cases, 291 Han Chinese ancestry non-responder cases, 291 Han Chinese ancestry non-responder cases | 160 Han Chinese ancestry non-responder cases, 291 Han Chinese ancestry non-responder cases, 291 Han Chinese ancestry non-responder cases, 291 Han Chinese ancestry non-responder cases | 16q23.3  | 16 | 83706502  | MIR3182, HSBP1, MLYC   |
| 176 | Up to 1,364 Han Chinese ancestry cases, up to 3,028 Han Chinese ancestry cases, 4,167 Han Chinese ancestry cases, 7,196 Han Chinese ancestry cases                                    | 4,167 Han Chinese ancestry cases, 7,196 Han Chinese ancestry cases, 7,196 Han Chinese ancestry cases, 7,196 Han Chinese ancestry cases                                                 | 4q12     | 4  | 55885574  | EXOC1                  |
| 177 | Up to 1,364 Han Chinese ancestry cases, up to 3,028 Han Chinese ancestry cases, 4,167 Han Chinese ancestry cases, 7,196 Han Chinese ancestry cases                                    | 4,167 Han Chinese ancestry cases, 7,196 Han Chinese ancestry cases, 7,196 Han Chinese ancestry cases, 7,196 Han Chinese ancestry cases                                                 | 6p21.32  | 6  | 33104395  | HLA-DPB2               |
| 178 | Up to 1,364 Han Chinese ancestry cases, up to 3,028 Han Chinese ancestry cases, 4,167 Han Chinese ancestry cases, 7,196 Han Chinese ancestry cases                                    | 4,167 Han Chinese ancestry cases, 7,196 Han Chinese ancestry cases, 7,196 Han Chinese ancestry cases, 7,196 Han Chinese ancestry cases                                                 | 17q21.1  | 17 | 39895095  | GSDMB                  |
| 179 | Up to 1,364 Han Chinese ancestry cases, up to 3,028 Han Chinese ancestry cases, 4,167 Han Chinese ancestry cases, 7,196 Han Chinese ancestry cases                                    | 4,167 Han Chinese ancestry cases, 7,196 Han Chinese ancestry cases, 7,196 Han Chinese ancestry cases, 7,196 Han Chinese ancestry cases                                                 | 6p21.32  | 6  | 33236497  | intergenic             |

|     | O                                                                           | P               | Q               |
|-----|-----------------------------------------------------------------------------|-----------------|-----------------|
| 127 | ZNF311 - OR2AD1P                                                            | ENSG00000197935 | ENSG00000233650 |
| 128 | EXOC4                                                                       |                 |                 |
| 129 | RPS3AP27, EXOC4                                                             |                 |                 |
| 130 | EXOC4                                                                       |                 |                 |
| 131 | TNKS - LINC00599                                                            | ENSG00000173273 | ENSG00000253230 |
| 132 | AC107952.2 - AC107952.1                                                     | ENSG00000272343 | ENSG00000254216 |
| 133 | AC087698.1 - RNA5SP267                                                      | ENSG00000206853 | ENSG00000201763 |
| 134 |                                                                             |                 |                 |
| 135 | PCA3, PRUNE2                                                                |                 |                 |
| 136 | TRDMT1                                                                      |                 |                 |
| 137 | INS-IGF2, AC132217.2                                                        |                 |                 |
| 138 | OR5B1P                                                                      |                 |                 |
| 139 | TMTC1                                                                       |                 |                 |
| 140 | TMEM233, AC002070.1                                                         |                 |                 |
| 141 | AL136962.1                                                                  |                 |                 |
| 142 | LINC00460 - RPL35P9                                                         | ENSG00000233532 | ENSG00000174418 |
| 143 | TTC5                                                                        |                 |                 |
| 144 | TEP1                                                                        |                 |                 |
| 145 | LRFN5                                                                       |                 |                 |
| 146 | MIR154 - MIR496                                                             | ENSG00000207978 | ENSG00000207961 |
| 147 | RBF0X1                                                                      |                 |                 |
| 148 | LINC02097, SOX9-AS1                                                         |                 |                 |
| 149 | RN7SL836P - GIPR                                                            | ENSG00000241226 | ENSG00000010310 |
| 150 | HAS1 - FPR1                                                                 | ENSG00000105509 | ENSG00000171051 |
| 151 | RASSF2                                                                      |                 |                 |
| 152 | RAB22A - VAPB                                                               | ENSG00000124209 | ENSG00000124164 |
| 153 | TCF7L1                                                                      |                 |                 |
| 154 | ADGRV1, LUCAT1                                                              |                 |                 |
| 155 | LINC01445                                                                   |                 |                 |
| 156 | HLA-DPA3, HLA-DPA3, HLA-DPA3, HLA-DPA3, HLA-DPA3, HLA-DPA3                  |                 |                 |
| 157 | ZPBP2 - GSDMB                                                               | ENSG00000186075 | ENSG00000073605 |
| 158 | HLA-DRB1 - HLA-DQA1                                                         | ENSG00000206240 | ENSG00000196735 |
| 159 | MICB - AL663061.2                                                           | ENSG00000231372 | ENSG00000256851 |
| 160 | GABRB1                                                                      |                 |                 |
| 161 | TBXAS1                                                                      |                 |                 |
| 162 | AC103957.2 - AC114550.2                                                     | ENSG00000254153 | ENSG00000253343 |
| 163 | SULF1 - SLC05A1                                                             | ENSG00000137573 | ENSG00000137571 |
| 164 | SUGT1P3 - ELF1                                                              | ENSG00000239827 | ENSG00000120690 |
| 165 | AC015660.1 - AC015660.5                                                     | ENSG00000259341 | ENSG00000286893 |
| 166 | LINC02582 - AC079070.1                                                      | ENSG00000261780 | ENSG00000265380 |
| 167 | LTA, LTA, LTA, LTA, LTA, LTA, LTA                                           |                 |                 |
| 168 | HLA-DQA1, HLA-DQA1, HLA-DQA1, HLA-DQA1, HLA-DQA1                            |                 |                 |
| 169 | HLA-DQA1                                                                    |                 |                 |
| 170 |                                                                             |                 |                 |
| 171 |                                                                             |                 |                 |
| 172 | HLA-DQA1                                                                    |                 |                 |
| 173 | AC020551.1                                                                  |                 |                 |
| 174 | AL139193.2, TTC7B                                                           |                 |                 |
| 175 | CDH13, AC009063.3                                                           |                 |                 |
| 176 | EXOC1                                                                       |                 |                 |
| 177 | COL11A2P1, COL11A2P1, COL11A2P1, COL11A2P1, COL11A2P1, COL11A2P1, COL11A2P1 |                 |                 |
| 178 | ZPBP2 - GSDMB                                                               | ENSG00000186075 | ENSG00000073605 |
| 179 | ZNF70P1 - HTATSFP1P1                                                        | ENSG00000230949 | ENSG00000224052 |

|     | R                                                                                                                     | S      | T      | U               | V             |
|-----|-----------------------------------------------------------------------------------------------------------------------|--------|--------|-----------------|---------------|
| 127 |                                                                                                                       | 11662  | 9702   | rs3129795-?     | rs3129795     |
| 128 | ENSG00000131558                                                                                                       |        |        | rs147175877-?   | rs147175877   |
| 129 | ENSG00000226205, ENSG00000131558                                                                                      |        |        | rs149996974-?   | rs149996974   |
| 130 | ENSG00000131558                                                                                                       |        |        | rs141588684-?   | rs141588684   |
| 131 |                                                                                                                       | 72480  | 45045  | rs2090064-?     | rs2090064     |
| 132 |                                                                                                                       | 23464  | 6323   | rs75951998-?    | rs75951998    |
| 133 |                                                                                                                       | 59506  | 258877 | rs58726170-?    | rs58726170    |
| 134 |                                                                                                                       |        |        | chr9:22422311-? | chr9:22422311 |
| 135 | ENSG00000225937, ENSG00000106772                                                                                      |        |        | rs17784899-?    | rs17784899    |
| 136 | ENSG00000107614                                                                                                       |        |        | rs147380957-?   | rs147380957   |
| 137 | ENSG00000129965, ENSG00000284779                                                                                      |        |        | rs150806792-?   | rs150806792   |
| 138 | ENSG00000233499                                                                                                       |        |        | rs184467454-?   | rs184467454   |
| 139 | ENSG00000133687                                                                                                       |        |        | rs377042484-?   | rs377042484   |
| 140 | ENSG00000224982, ENSG00000248636                                                                                      |        |        | rs142761815-?   | rs142761815   |
| 141 | ENSG00000276476                                                                                                       |        |        | rs146343995-?   | rs146343995   |
| 142 |                                                                                                                       | 38349  | 3109   | rs141629209-?   | rs141629209   |
| 143 | ENSG00000136319                                                                                                       |        |        | rs145233920-?   | rs145233920   |
| 144 | ENSG00000129566                                                                                                       |        |        | rs149049108-?   | rs149049108   |
| 145 | ENSG00000165379                                                                                                       |        |        | rs138523818-?   | rs138523818   |
| 146 |                                                                                                                       | 6      | 729    | rs41286572-?    | rs41286572    |
| 147 | ENSG00000078328                                                                                                       |        |        | rs72764914-?    | rs72764914    |
| 148 | ENSG00000226101, ENSG00000234899                                                                                      |        |        | rs140991990-?   | rs140991990   |
| 149 |                                                                                                                       | 14785  | 1631   | rs56182403-?    | rs56182403    |
| 150 |                                                                                                                       | 10312  | 10869  | rs75724373-?    | rs75724373    |
| 151 | ENSG00000101265                                                                                                       |        |        | rs201524967-?   | rs201524967   |
| 152 |                                                                                                                       | 8391   | 13331  | rs6513380-?     | rs6513380     |
| 153 | ENSG00000152284                                                                                                       |        |        | rs6547598-A     | rs6547598     |
| 154 | ENSG00000164199, ENSG00000248323                                                                                      |        |        | rs59661306-G    | rs59661306    |
| 155 | ENSG00000231427                                                                                                       |        |        | rs7457728-C     | rs7457728     |
| 156 | ENSG00000223696, ENSG00000223447, ENSG00000231895, ENSG00000227936, ENSG00000224929, ENSG00000237398                  |        |        | rs115137622-C   | rs115137622   |
| 157 |                                                                                                                       | 17199  | 9500   | rs8067378-G     | rs8067378     |
| 158 |                                                                                                                       | 26956  | 11375  | rs73730372-?    | rs73730372    |
| 159 |                                                                                                                       | 1767   | 3088   | rs3132461-G     | rs3132461     |
| 160 | ENSG00000163288                                                                                                       |        |        | rs4396968-T     | rs4396968     |
| 161 | ENSG00000059377                                                                                                       |        |        | rs2267681-?     | rs2267681     |
| 162 |                                                                                                                       | 62182  | 32219  | rs56804039-?    | rs56804039    |
| 163 |                                                                                                                       | 2980   | 3151   | rs4738017-G     | rs4738017     |
| 164 |                                                                                                                       | 5640   | 4510   | rs9532669-A     | rs9532669     |
| 165 |                                                                                                                       | 16643  | 21651  | rs11637339-C    | rs11637339    |
| 166 |                                                                                                                       | 246236 | 115214 | rs17087933-?    | rs17087933    |
| 167 | ENSG00000223919, ENSG00000231408, ENSG00000230279, ENSG00000226979, ENSG00000238130, ENSG00000173503, ENSG00000226275 |        |        | rs2239704-A     | rs2239704     |
| 168 | ENSG00000232062, ENSG00000206305, ENSG00000236418, ENSG00000225890, ENSG00000196735                                   |        |        | rs9272143-?     | rs9272143     |
| 169 |                                                                                                                       |        |        | HLA-DQB1*602-?  | HLA-DQB1*602  |
| 170 |                                                                                                                       |        |        | HLA-DQA1*0301-? | HLA-DQA1*0301 |
| 171 |                                                                                                                       |        |        | HLA-B*15-?      | HLA-B*15      |
| 172 |                                                                                                                       |        |        | HAL-DRB1*13-?   | HAL-DRB1*13   |
| 173 | ENSG00000250993                                                                                                       |        |        | rs6812281-T     | rs6812281     |
| 174 | ENSG00000258716, ENSG00000165914                                                                                      |        |        | rs1742101-G     | rs1742101     |
| 175 | ENSG00000140945, ENSG00000261103                                                                                      |        |        | rs1364121-A     | rs1364121     |
| 176 | ENSG00000090989                                                                                                       |        |        | rs13117307-T    | rs13117307    |
| 177 | ENSG00000228688, ENSG00000232802, ENSG00000227577, ENSG00000226513, ENSG00000234249, ENSG00000228164, ENSG00000230816 |        |        | rs4282438-?     | rs4282438     |
| 178 |                                                                                                                       | 17199  | 9500   | rs8067378-G     | rs8067378     |
| 179 |                                                                                                                       | 20169  | 1302   | rs9277952-?     | rs9277952     |

|     | W | X         | Y                                  | Z | AA    | AB       | AC          | AD        | AE          | AF                                    | AG | AH                        | AI         | AJ |
|-----|---|-----------|------------------------------------|---|-------|----------|-------------|-----------|-------------|---------------------------------------|----|---------------------------|------------|----|
| 127 | 0 | 3129795   | TF_binding_site_variant            | 1 |       | 8.00E-06 | 5.096910013 | 1.0526316 | [1.03-1.08] | Illumina [7645193] (imputed)          | N  | cervical carcinoma        | GCST009825 |    |
| 128 | 0 | 147175877 | intron_variant                     | 0 |       | 3.00E-06 | 5.522878745 | 2.66      | [1.77-4.02] | Illumina [7645193] (imputed)          | N  | cervical carcinoma        | GCST009826 |    |
| 129 | 0 | 149996974 | non_coding_transcript_exon_variant | 0 |       | 1.00E-06 | 6           | 3.79      | [2.21-6.51] | Illumina [7645193] (imputed)          | N  | cervical carcinoma        | GCST009826 |    |
| 130 | 0 | 141588684 | intron_variant                     | 0 |       | 5.00E-06 | 5.301029996 | 3.6       | [2.07-6.23] | Illumina [7645193] (imputed)          | N  | cervical carcinoma        | GCST009826 |    |
| 131 | 0 | 2090064   | intergenic_variant                 | 1 |       | 5.00E-07 | 6.301029996 | 1.4492754 | [1.25-1.67] | Illumina [7645193] (imputed)          | N  | cervical carcinoma        | GCST009826 |    |
| 132 | 0 | 75951998  | intergenic_variant                 | 6 |       | 1.00E-06 | 6           | 1.86      | [1.45-2.38] | Illumina [7645193] (imputed)          | N  | cervical carcinoma        | GCST009826 |    |
| 133 | 0 | 58726170  | intergenic_variant                 | 1 |       | 7.00E-06 | 5.15490196  | 2.01      | [1.48-2.72] | Illumina [7645193] (imputed)          | N  | cervical carcinoma        | GCST009826 |    |
| 134 | 0 |           |                                    | 1 |       | 5.00E-06 | 5.301029996 | 4.82      | [2.46-9.45] | Illumina [7645193] (imputed)          | N  | cervical carcinoma        | GCST009826 |    |
| 135 | 0 | 17784899  | intron_variant                     | 0 |       | 6.00E-07 | 6.22184875  | 1.5       | [1.28-1.76] | Illumina [7645193] (imputed)          | N  | cervical carcinoma        | GCST009826 |    |
| 136 | 0 | 147380957 | intron_variant                     | 0 |       | 4.00E-06 | 5.397940009 | 1.86      | [1.43-2.42] | Illumina [7645193] (imputed)          | N  | cervical carcinoma        | GCST009826 |    |
| 137 | 0 | 150806792 | intron_variant                     | 0 |       | 5.00E-08 | 7.301029996 | 4.96      | [2.79-8.83] | Illumina [7645193] (imputed)          | N  | cervical carcinoma        | GCST009826 |    |
| 138 | 0 | 184467454 | non_coding_transcript_exon_variant | 0 |       | 9.00E-06 | 5.045757491 | 2.47      | [1.66-3.67] | Illumina [7645193] (imputed)          | N  | cervical carcinoma        | GCST009826 |    |
| 139 | 0 | 377042484 | intron_variant                     | 0 |       | 4.00E-06 | 5.397940009 | 2.65      | [1.75-4.01] | Illumina [7645193] (imputed)          | N  | cervical carcinoma        | GCST009826 |    |
| 140 | 0 | 142761815 | intron_variant                     | 0 |       | 2.00E-06 | 5.698970004 | 2.73      | [1.81-4.12] | Illumina [7645193] (imputed)          | N  | cervical carcinoma        | GCST009826 |    |
| 141 | 0 | 146343995 | intron_variant                     | 0 |       | 2.00E-07 | 6.698970004 | 4.31      | [2.49-7.46] | Illumina [7645193] (imputed)          | N  | cervical carcinoma        | GCST009826 |    |
| 142 | 0 | 141629209 | regulatory_region_variant          | 1 |       | 9.00E-08 | 7.045757491 | 4.67      | [2.65-8.22] | Illumina [7645193] (imputed)          | N  | cervical carcinoma        | GCST009826 |    |
| 143 | 0 | 145233920 | intron_variant                     | 0 |       | 1.00E-06 | 6           | 2.12      | [1.57-2.87] | Illumina [7645193] (imputed)          | N  | cervical carcinoma        | GCST009826 |    |
| 144 | 0 | 149049108 | 3_prime_UTR_variant                | 0 |       | 4.00E-06 | 5.397940009 | 2.22      | [1.58-3.11] | Illumina [7645193] (imputed)          | N  | cervical carcinoma        | GCST009826 |    |
| 145 | 0 | 138523818 | intron_variant                     | 0 |       | 3.00E-07 | 6.522878745 | 3.57      | [2.19-5.83] | Illumina [7645193] (imputed)          | N  | cervical carcinoma        | GCST009826 |    |
| 146 | 0 | 41286572  | intergenic_variant                 | 1 |       | 4.00E-06 | 5.397940009 | 2.19      | [1.57-3.06] | Illumina [7645193] (imputed)          | N  | cervical carcinoma        | GCST009826 |    |
| 147 | 0 | 72764914  | intron_variant                     | 0 |       | 2.00E-07 | 6.698970004 | 1.87      | [1.47-2.37] | Illumina [7645193] (imputed)          | N  | cervical carcinoma        | GCST009826 |    |
| 148 | 0 | 140991990 | intron_variant                     | 0 |       | 3.00E-08 | 7.522878745 | 4.94      | [2.80-8.71] | Illumina [7645193] (imputed)          | N  | cervical carcinoma        | GCST009826 |    |
| 149 | 0 | 56182403  | regulatory_region_variant          | 1 |       | 8.00E-07 | 6.096910013 | 2.72      | [1.83-4.04] | Illumina [7645193] (imputed)          | N  | cervical carcinoma        | GCST009826 |    |
| 150 | 0 | 75724373  | regulatory_region_variant          | 1 |       | 5.00E-06 | 5.301029996 | 1.45      | [1.24-1.70] | Illumina [7645193] (imputed)          | N  | cervical carcinoma        | GCST009826 |    |
| 151 | 0 | 201524967 | intron_variant                     | 0 |       | 2.00E-06 | 5.698970004 | 3.71      | [2.17-6.36] | Illumina [7645193] (imputed)          | N  | cervical carcinoma        | GCST009826 |    |
| 152 | 0 | 6513380   | intergenic_variant                 | 1 |       | 7.00E-06 | 5.15490196  | 2.98      | [1.85-4.79] | Illumina [7645193] (imputed)          | N  | cervical carcinoma        | GCST009826 |    |
| 153 | 0 | 6547598   | intron_variant                     | 0 | 0.93  | 1.00E-06 | 6           | 1.35      | [NR]        | Affymetrix, Illumina [4602429] (imp N | N  | cervical carcinoma        | GCST007119 |    |
| 154 | 0 | 59661306  | intron_variant                     | 0 | 0.15  | 2.00E-11 | 10.69897    | 1.2987013 | [NR]        | Affymetrix, Illumina [4602429] (imp N | N  | cervical carcinoma        | GCST007119 |    |
| 155 | 0 | 7457728   | intron_variant                     | 0 | 0.39  | 1.00E-08 | 8           | 1.19      | [NR]        | Affymetrix, Illumina [4602429] (imp N | N  | cervical carcinoma        | GCST007119 |    |
| 156 | 1 | 79249189  | intron_variant                     | 0 | 0.62  | 9.00E-09 | 8.045757491 | 1.32      | [NR]        | Affymetrix, Illumina [4602429] (imp N | N  | cervical carcinoma        | GCST007119 |    |
| 157 | 0 | 8067378   | regulatory_region_variant          | 1 | 0.28  | 3.00E-06 | 5.522878745 | 1.22      | [NR]        | Affymetrix, Illumina [4602429] (imp N | N  | cervical carcinoma        | GCST007119 |    |
| 158 | 0 | 73730372  | regulatory_region_variant          | 1 |       | 3.00E-19 | 18.52287875 | 1.67      | [1.49-1.85] | Illumina [5471179]                    | N  | cervical carcinoma        | GCST003565 |    |
| 159 | 0 | 3132461   | intergenic_variant                 | 1 | NR    | 2.00E-13 | 12.69897    | 1.358     | [NR]        | Illumina [10863230] (imputed)         | N  | cervical carcinoma        | GCST004833 |    |
| 160 | 0 | 4396968   | intron_variant                     | 0 | NR    | 1.00E-06 | 6           | 1.26      | [NR]        | Illumina [10863230] (imputed)         | N  | cervical carcinoma        | GCST004833 |    |
| 161 | 0 | 2267681   | intron_variant                     | 0 | NR    | 2.00E-06 | 5.698970004 | 1.1806375 | [NR]        | Illumina [10863230] (imputed)         | N  | cervical carcinoma        | GCST004833 |    |
| 162 | 0 | 56804039  | intergenic_variant                 | 1 | NR    | 4.00E-06 | 5.397940009 | 1.2091899 | [NR]        | Illumina [10863230] (imputed)         | N  | cervical carcinoma        | GCST004833 |    |
| 163 | 0 | 4738017   | regulatory_region_variant          | 1 | NR    | 7.00E-06 | 5.15490196  | 1.174     | [NR]        | Illumina [10863230] (imputed)         | N  | cervical carcinoma        | GCST004833 |    |
| 164 | 0 | 9532669   | intergenic_variant                 | 1 | NR    | 2.00E-07 | 6.698970004 | 1.216     | [NR]        | Illumina [10863230] (imputed)         | N  | cervical carcinoma        | GCST004833 |    |
| 165 | 0 | 11637339  | intergenic_variant                 | 1 | NR    | 6.00E-06 | 5.22184875  | 1.184     | [NR]        | Illumina [10863230] (imputed)         | N  | cervical carcinoma        | GCST004833 |    |
| 166 | 0 | 17087933  | intergenic_variant                 | 1 | NR    | 2.00E-06 | 5.698970004 | 1.2787724 | [NR]        | Illumina [10863230] (imputed)         | N  | cervical carcinoma        | GCST004833 |    |
| 167 | 0 | 2239704   | 5_prime_UTR_variant                | 0 | NR    | 6.00E-09 | 8.22184875  | 1.23      | [NR]        | Illumina [10863230] (imputed)         | N  | cervical carcinoma        | GCST004833 |    |
| 168 | 0 | 9272143   | intron_variant                     | 0 | NR    | 5.00E-15 | 14.30103    | 1.3513513 | [NR]        | Illumina [10863230] (imputed)         | N  | cervical carcinoma        | GCST004833 |    |
| 169 | 0 |           |                                    | 1 | 0.141 | 4.00E-12 | 11.39794001 | 1.44      | [NR]        | Illumina [10863230] (imputed)         | N  | cervical carcinoma        | GCST004833 |    |
| 170 | 0 |           |                                    | 1 | 0.224 | 4.00E-08 | 7.397940009 |           |             | Illumina [10863230] (imputed)         | N  | cervical carcinoma        | GCST004833 |    |
| 171 | 0 |           |                                    | 1 | 0.072 | 2.00E-09 | 8.698970004 | 0.64      | [NR]        | Illumina [10863230] (imputed)         | N  | cervical carcinoma        | GCST004833 |    |
| 172 | 0 |           |                                    | 1 | 0.106 | 1.00E-09 | 9           | 0.69      | [NR]        | Illumina [10863230] (imputed)         | N  | cervical carcinoma        | GCST004833 |    |
| 173 | 0 | 6812281   | intron_variant                     | 0 | 0.18  | 9.00E-09 | 8.045757491 | 2.37      | [1.77-3.18] | Affymetrix [657178]                   | N  | cervical carcinoma, respo | GCST004097 |    |
| 174 | 0 | 1742101   | non_coding_transcript_exon_variant | 0 | 0.5   | 7.00E-06 | 5.15490196  | 1.92      | [1.45-2.56] | Affymetrix [657178]                   | N  | cervical carcinoma, respo | GCST004097 |    |
| 175 | 0 | 1364121   | non_coding_transcript_exon_variant | 0 | 0.25  | 3.00E-06 | 5.522878745 | 1.98      | [1.49-2.64] | Affymetrix [657178]                   | N  | cervical carcinoma, respo | GCST004097 |    |
| 176 | 0 | 13117307  | intron_variant                     | 0 | 0.1   | 3.00E-10 | 9.522878745 | 1.28      | [1.19-1.38] | Affymetrix [563339]                   | N  | cervical carcinoma        | GCST002082 |    |
| 177 | 0 | 4282438   | intron_variant                     | 0 | 0.56  | 5.00E-27 | 26.30103    | 1.35      | [1.27-1.41] | Affymetrix [563339]                   | N  | cervical carcinoma        | GCST002082 |    |
| 178 | 0 | 8067378   | regulatory_region_variant          | 1 | 0.22  | 9.00E-10 | 9.045757491 | 1.19      | [1.13-1.26] | Affymetrix [563339]                   | N  | cervical carcinoma        | GCST002082 |    |
| 179 | 0 | 9277952   | intergenic_variant                 | 1 | 0.53  | 2.00E-09 | 8.698970004 | 1.18      | [1.12-1.23] | Affymetrix [563339]                   | N  | cervical carcinoma        | GCST002082 |    |



**Supplement Table 10.** Replication lookup of UKB SNPS derived from conditional logistic regression in the FinnGen r5 public data.

| Phenotype (UKB equivalent)                      | CHR | pos       | ref | alt | rsids       | alternat_rsids | nearest_gene | pval      | beta    | OR         | sebeta | maf     | maf_cases | maf_controls | n_hom_cases | n_het_cases | n_hom_controls | n_het_controls |
|-------------------------------------------------|-----|-----------|-----|-----|-------------|----------------|--------------|-----------|---------|------------|--------|---------|-----------|--------------|-------------|-------------|----------------|----------------|
| Malignant neoplasm of cervix uteri (ICC)        | 2   | 113230915 | G   | A   | rs10175462  | NA             | PAX8         | 0.01193   | -0.0899 | 0.91402258 | 0.0358 | 0.4305  | 0.4077    | 0.4308       | 272         | 799.62      | 22601.06       | 59849.24       |
| Malignant neoplasm of cervix uteri (ICC)        | 2   | 113235223 | TCC | T   | rs35724515  | rs397778746    | PAX8         | 0.01401   | -0.088  | 0.91576088 | 0.0358 | 0.4304  | 0.4081    | 0.4307       | 273.6       | 797.87      | 22577.43       | 59870          |
| Malignant neoplasm of cervix uteri (ICC)        | 5   | 1347013   | C   | T   | rs27069     | NA             | CLPTM1L      | 2.54E-07  | -0.1864 | 0.82994155 | 0.0362 | 0.4156  | 0.3725    | 0.4162       | 234.48      | 758.67      | 21007.22       | 59475.17       |
| Malignant neoplasm of cervix uteri (ICC)        | 6   | 32631294  | G   | A   | rs9272050   | NA             | HLA-DQA1     | 7.90E-08  | -0.1951 | 0.82275238 | 0.0363 | 0.5592  | 0.5095    | 0.5598       | 422.45      | 834.38      | 38348.99       | 59824.16       |
| Malignant neoplasm of cervix uteri (ICC)        | 12  | 109208011 | A   | G   | rs117960705 | NA             | ACACB        | 0.8257    | -0.0325 | 0.96802245 | 0.1475 | 0.01498 | 0.01472   | 0.01499      | 1.91        | 44.69       | 32.38          | 3590.26        |
| Carcinoma in situ of cervix uteri (CIN3)        | 2   | 113230915 | G   | A   | rs10175462  | NA             | PAX8         | 0.06941   | -0.1508 | 0.86001969 | 0.083  | 0.4305  | 0.3927    | 0.4306       | 51.05       | 131.95      | 22822.02       | 60516.91       |
| Carcinoma in situ of cervix uteri (CIN3)        | 2   | 113235223 | TCC | T   | rs35724515  | rs397778746    | PAX8         | 0.07467   | -0.1483 | 0.86217242 | 0.0832 | 0.4304  | 0.3933    | 0.4305       | 51.23       | 131.98      | 22799.8        | 60535.89       |
| Carcinoma in situ of cervix uteri (CIN3)        | 5   | 1347013   | C   | T   | rs27069     | NA             | CLPTM1L      | 0.03929   | -0.1728 | 0.84130586 | 0.0838 | 0.4156  | 0.3757    | 0.4157       | 42.53       | 138.84      | 21199.18       | 60095          |
| Carcinoma in situ of cervix uteri (CIN3)        | 6   | 32631294  | G   | A   | rs9272050   | NA             | HLA-DQA1     | 0.0004878 | -0.2932 | 0.74587295 | 0.0841 | 0.5592  | 0.4827    | 0.5593       | 73.65       | 140.39      | 38697.79       | 60518.15       |
| Carcinoma in situ of cervix uteri (CIN3)        | 12  | 109208011 | A   | G   | rs117960705 | NA             | ACACB        | 0.3017    | -0.3543 | 0.70166444 | 0.343  | 0.01498 | 0.0101    | 0.015        | 0           | 6.02        | 34.29          | 3628.94        |
| Dysplasia of cervix uteri (Cervical dysplasia)* | 2   | 113230915 | G   | A   | rs10175462  | NA             | PAX8         | 0.0001735 | -0.0865 | 0.91713555 | 0.023  | 0.4322  | 0.4112    | 0.4335       | 728.96      | 2034.03     | 12924.65       | 33944.03       |
| Dysplasia of cervix uteri (Cervical dysplasia)* | 2   | 113235223 | TCC | T   | rs35724515  | rs397778746    | PAX8         | 0.0002372 | -0.0848 | 0.91869601 | 0.0231 | 0.432   | 0.4115    | 0.4333       | 731.31      | 2031.96     | 12904.49       | 33958.67       |
| Dysplasia of cervix uteri (Cervical dysplasia)* | 5   | 1347013   | C   | T   | rs27069     | NA             | CLPTM1L      | 0.0004168 | -0.0823 | 0.92099562 | 0.0233 | 0.4133  | 0.3948    | 0.4145       | 660.02      | 2033.02     | 11760.62       | 33652.54       |
| Dysplasia of cervix uteri (Cervical dysplasia)* | 6   | 32631294  | G   | A   | rs9272050   | NA             | HLA-DQA1     | 5.33E-10  | -0.1454 | 0.86467635 | 0.0234 | 0.559   | 0.5231    | 0.5612       | 1164.47     | 2113.34     | 21754.87       | 33902.9        |
| Dysplasia of cervix uteri (Cervical dysplasia)* | 12  | 109208011 | A   | G   | rs117960705 | NA             | ACACB        | 0.1373    | 0.141   | 1.15142465 | 0.0949 | 0.01508 | 0.01701   | 0.01496      | 2.13        | 140.21      | 21.32          | 2021.42        |

**Abbreviations:** CHR: chromosome

\*Cervical dysplasia phenotype consists mainly of CIN3 lesions however will contain a small number of CIN1 and CIN2 lesions as recorded in Finnish Cancer Registries and Hospital Discharge Registries

**Supplement Table 11.** eQTL results for Discovery SNPs (UKBB)  $P < 10e-8$  in Chr 2 novel hit identified from PanCanQTL database for CESC (N=300)

| Analysis                                             | Cancer Type | RSID       | Genomic Location (hg19) | Allele (A/a) | Gene      | Gene Position (hg19)       | Beta  | t-stat | P-value  |
|------------------------------------------------------|-------------|------------|-------------------------|--------------|-----------|----------------------------|-------|--------|----------|
| <b>eQTL for rs4849179 in CESC</b>                    |             |            |                         |              |           |                            |       |        |          |
|                                                      | CEC         | rs4849179  | chr2:113985170          | C/T          | LOC654433 | chr2:113993107-114024579:+ | -0.41 | -6     | 6.06E-09 |
|                                                      | CEC         | rs4849179  | chr2:113985170          | C/T          | PAX8      | chr2:113973574-114036527:- | -0.28 | -4.23  | 3.25E-05 |
| <b>All the SNPs with eQTL with PAX8 in CESC</b>      |             |            |                         |              |           |                            |       |        |          |
|                                                      | CEC         | rs10175462 | chr2:113988492          | G/A          | PAX8      | chr2:113973574-114036527:- | -0.28 | -4.21  | 3.40E-05 |
|                                                      | CEC         | rs10206269 | chr2:113990393          | C/A          | PAX8      | chr2:113973574-114036527:- | -0.3  | -4.29  | 2.46E-05 |
|                                                      | CEC         | rs11123170 | chr2:113978940          | C/G          | PAX8      | chr2:113973574-114036527:- | -0.3  | -4.31  | 2.26E-05 |
|                                                      | CEC         | rs11123172 | chr2:113984303          | C/T          | PAX8      | chr2:113973574-114036527:- | 0.28  | 4.16   | 4.31E-05 |
|                                                      | CEC         | rs2863243  | chr2:113989267          | A/G          | PAX8      | chr2:113973574-114036527:- | -0.28 | -4.22  | 3.31E-05 |
|                                                      | CEC         | rs4849177  | chr2:113982584          | T/C          | PAX8      | chr2:113973574-114036527:- | -0.3  | -4.49  | 1.05E-05 |
|                                                      | CEC         | rs4849179  | chr2:113985170          | C/T          | PAX8      | chr2:113973574-114036527:- | -0.28 | -4.23  | 3.25E-05 |
|                                                      | CEC         | rs6707386  | chr2:113981022          | G/A          | PAX8      | chr2:113973574-114036527:- | -0.32 | -4.69  | 4.40E-06 |
|                                                      | CEC         | rs6755040  | chr2:113981137          | T/C          | PAX8      | chr2:113973574-114036527:- | -0.31 | -4.67  | 4.81E-06 |
|                                                      | CEC         | rs7421852  | chr2:113990261          | G/A          | PAX8      | chr2:113973574-114036527:- | -0.3  | -4.3   | 2.33E-05 |
|                                                      | CEC         | rs7563094  | chr2:113989327          | T/C          | PAX8      | chr2:113973574-114036527:- | -0.28 | -4.21  | 3.40E-05 |
|                                                      | CEC         | rs7578633  | chr2:113978650          | C/T          | PAX8      | chr2:113973574-114036527:- | -0.31 | -4.43  | 1.34E-05 |
| <b>All the SNPs with eQTL with LOC654433 in CESC</b> |             |            |                         |              |           |                            |       |        |          |
|                                                      | CEC         | rs10175462 | chr2:113988492          | G/A          | LOC654433 | chr2:113993107-114024579:+ | -0.4  | -5.9   | 1.09E-08 |
|                                                      | CEC         | rs10206269 | chr2:113990393          | C/A          | LOC654433 | chr2:113993107-114024579:+ | -0.44 | -6.19  | 2.22E-09 |
|                                                      | CEC         | rs10579377 | chr2:113953974          | GACA/G       | LOC654433 | chr2:113993107-114024579:+ | 0.32  | 4.58   | 7.04E-06 |
|                                                      | CEC         | rs11123170 | chr2:113978940          | C/G          | LOC654433 | chr2:113993107-114024579:+ | -0.45 | -6.32  | 1.02E-09 |
|                                                      | CEC         | rs11123172 | chr2:113984303          | C/T          | LOC654433 | chr2:113993107-114024579:+ | 0.41  | 5.9    | 1.06E-08 |
|                                                      | CEC         | rs12612729 | chr2:113957048          | G/A          | LOC654433 | chr2:113993107-114024579:+ | 0.32  | 4.58   | 7.04E-06 |
|                                                      | CEC         | rs12619508 | chr2:113982040          | C/A          | LOC654433 | chr2:113993107-114024579:+ | 0.35  | 5.03   | 8.76E-07 |
|                                                      | CEC         | rs12620738 | chr2:113963739          | C/T          | LOC654433 | chr2:113993107-114024579:+ | 0.32  | 4.57   | 7.52E-06 |
|                                                      | CEC         | rs2015769  | chr2:113957637          | A/G          | LOC654433 | chr2:113993107-114024579:+ | 0.32  | 4.58   | 7.04E-06 |
|                                                      | CEC         | rs2019137  | chr2:113973632          | G/A          | LOC654433 | chr2:113993107-114024579:+ | 0.33  | 4.7    | 4.04E-06 |
|                                                      | CEC         | rs2241978  | chr2:113954006          | A/G          | LOC654433 | chr2:113993107-114024579:+ | 0.32  | 4.58   | 7.04E-06 |
|                                                      | CEC         | rs2276561  | chr2:113956371          | G/C          | LOC654433 | chr2:113993107-114024579:+ | 0.32  | 4.58   | 7.04E-06 |
|                                                      | CEC         | rs2289897  | chr2:113977454          | G/A          | LOC654433 | chr2:113993107-114024579:+ | -0.35 | -4.42  | 1.44E-05 |
|                                                      | CEC         | rs2305133  | chr2:113956821          | C/G          | LOC654433 | chr2:113993107-114024579:+ | 0.32  | 4.58   | 7.04E-06 |
|                                                      | CEC         | rs2863240  | chr2:113970116          | C/T          | LOC654433 | chr2:113993107-114024579:+ | 0.29  | 3.98   | 8.77E-05 |

Abbreviations: CESC: Cervical squamous cell carcinoma and endocervical adenocarcinoma

**Supplement Table 12.** Two-sample inverse variance weighted (IVW) MR full results for all exposures with GWAS available for analysis

| <b>Exposure</b>           | <b>OR</b> | <b>SE</b> | <b>Lower 95%CI</b> | <b>Upper 95%CI</b> | <b>P</b> | <b>FDR</b> |
|---------------------------|-----------|-----------|--------------------|--------------------|----------|------------|
| Smoking (cigarettes/day)  | 2.456     | 0.509     | 1.636              | 3.687              | 1.48E-05 | 2.24e-05   |
| Age at first pregnancy    | 0.800     | 0.068     | 0.676              | 0.945              | 8.79E-03 | 8.79E-03   |
| Number of sexual partners | 1.948     | 0.300     | 1.440              | 2.634              | 1.49E-05 | 2.24E-05   |

Abbreviations: *FDR*: false discovery rate; *OR*: odds ratio; *P*: P-value; *SE*: standard error; *95%CI*: 95%confidence interval.

**Supplement Table 13.** Two-sample inverse variance weighted (IVW) MR sensitivity analysis results for all exposures

**A) Weighted-Median**

| <b>Exposure</b>           | <b>OR</b> | <b>SE</b> | <b>CI-lower</b> | <b>CI-upper</b> | <b>P-value</b> |
|---------------------------|-----------|-----------|-----------------|-----------------|----------------|
| Lifetime smoking index    | 1.992     | 0.557     | 1.152           | 3.445           | 1.36E-02       |
| Number of sexual partners | 1.945     | 0.399     | 1.301           | 2.906           | 1.17E-03       |
| Age at first pregnancy    | 0.813     | 0.087     | 0.659           | 1.004           | 5.44E-02       |

**B) MR-PRESSO**

| <b>Exposure</b>           | <b>Analysis</b> | <b>OR</b> | <b>SE</b>  | <b>P-value</b> |
|---------------------------|-----------------|-----------|------------|----------------|
| Lifetime smoking index    | Raw             | 2.455734  | 0.50928208 | 3.02E-05       |
|                           | Corrected       | 2.3140887 | 0.45967255 | 4.63E-05       |
| Number of sexual partners | Raw             | 1.9476112 | 0.29985566 | 4.06E-05       |
|                           | Corrected       | NA        | NA         | NA             |
| Age at first pregnancy    | Raw             | 0.7995042 | 0.04995509 | 1.59E-02       |
|                           | Corrected       | NA        | NA         | NA             |

**Supplement Table 14.** Multivariable MR results for all exposures

**A) Multivariable MR (age at first pregnancy adjusted for number of sexual partners\*)**

| Exposure                  | OR    | SE    | CI-lower | CI-upper | P-value |
|---------------------------|-------|-------|----------|----------|---------|
| Number of sexual partners | 0.217 | 0.337 | 0.010    | 4.586    | 0.326   |
| Age at first pregnancy    | 0.758 | 0.062 | 0.645    | 0.890    | 0.001   |

**(univariable results for age at first pregnancy)**

|                        |       |       |       |       |          |
|------------------------|-------|-------|-------|-------|----------|
| Age at first pregnancy | 0.800 | 0.068 | 0.676 | 0.945 | 8.79E-03 |
|------------------------|-------|-------|-------|-------|----------|

**B) Multivariable MR on risky behaviours (smoking adjusted for Lifetime smoking incidence) \*\***

| Exposure                  | OR    | SE    | CI-lower | CI-upper | P-value  |
|---------------------------|-------|-------|----------|----------|----------|
| Number of sexual partners | 1.879 | 0.333 | 1.328    | 2.661    | 3.74E-04 |
| Lifetime smoking index    | 1.737 | 0.425 | 1.075    | 2.806    | 2.42E-02 |

**(univariable results)**

|                           |       |       |       |       |          |
|---------------------------|-------|-------|-------|-------|----------|
| Number of sexual partners | 1.948 | 0.300 | 1.440 | 2.634 | 1.49E-05 |
| Lifetime smoking index    | 2.456 | 0.509 | 1.636 | 3.687 | 1.48E-05 |

\*Genetic variants selected as instrumental variables are selected based on age at first pregnancy (n=10)

\*\*Genetic variants selected as instrumental variables are selected based on smoking and number of sexual partner jointly (n=166)

## 4 SUPPLEMENTARY FIGURES

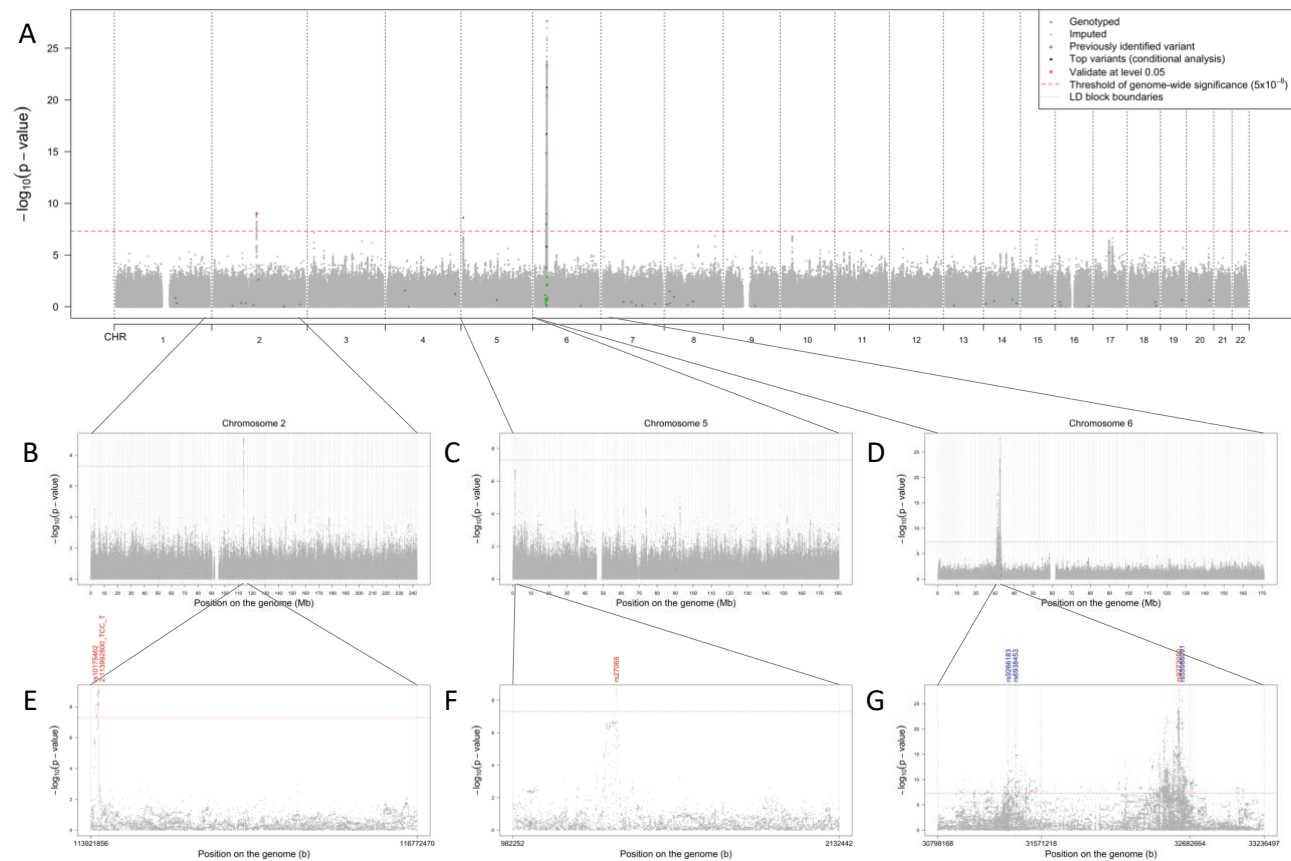

**Supplementary Figure 1. Manhattan plots showing the associations between genetic variants and CIN3/ICC in the European unrelated population (N=4,797 cases vs N=146,178 controls).** Genetic variants are ordered by their position on the genome (X-axis). The p-values, measuring the strength of association, are derived from additive logistic models and are represented on the  $-\log_{10}$  scale (Y-axis). The genome-wide significance level is set to  $5 \times 10^{-8}$  (horizontal red line). Results are presented for all the (N=9,600,464) assayed and imputed variants (A), for chromosome 2 (N=798,812 variants, B), 5 (N=616,800 variants, C), and 6 (N=651,104 variants, D). Within each chromosome, the regions containing significant associations are represented in more detail (E, F, G, respectively). Lead SNPs identified in the conditional analysis (blue: rs10175462; rs27069; rs9272050; rs6938453; rs55986091; rs9266183) and derived from FinnGen r5 replication (red: rs10175462 or 113992800\_TCC\_T; rs27069; rs9272050) are represented.

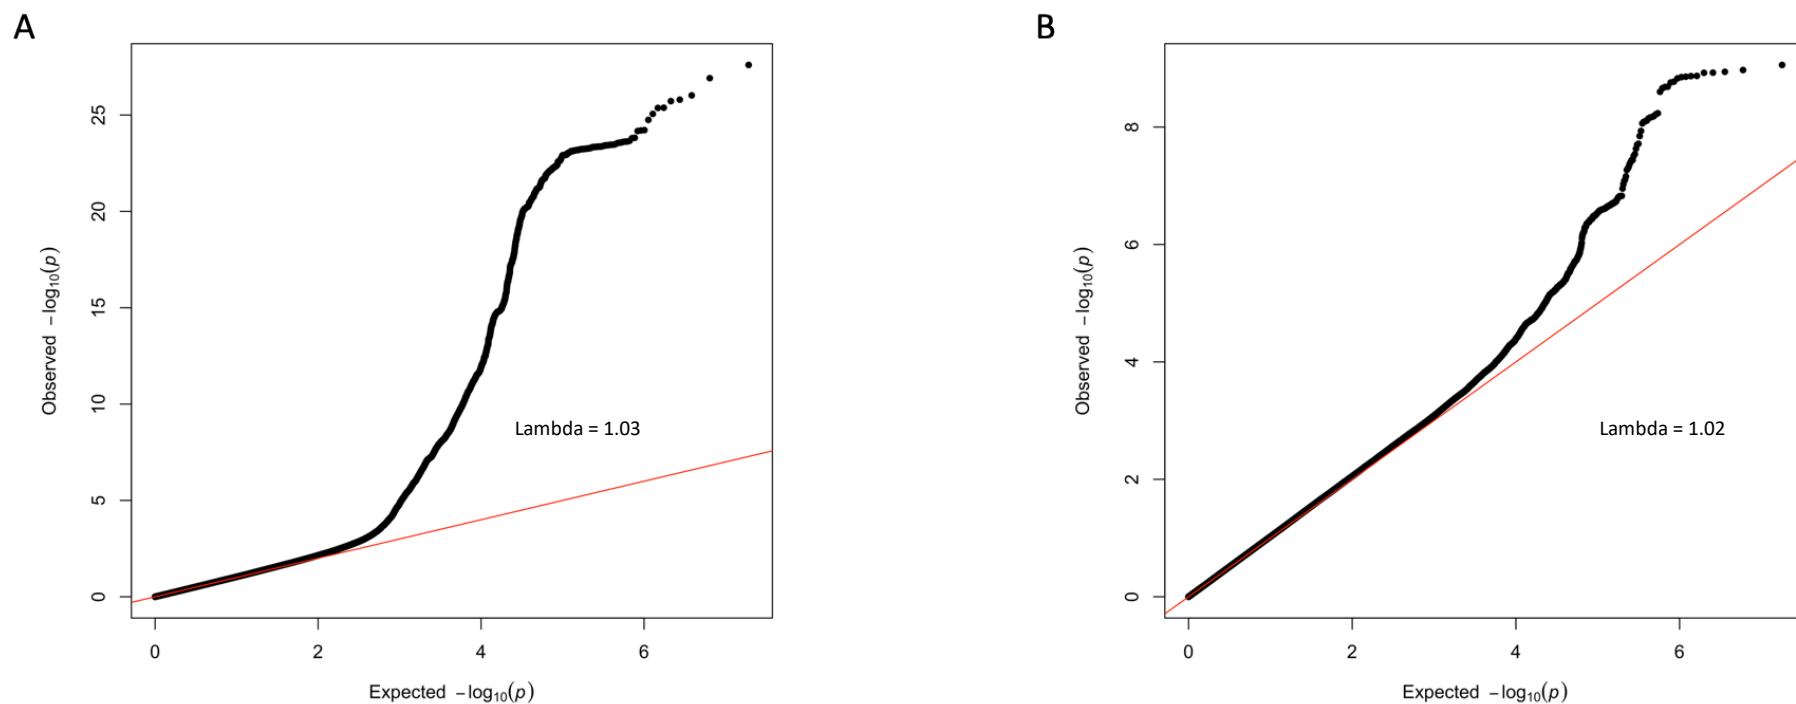

**Supplementary Figure 2. Quantile-quantile (QQ) plot of p-values from the genome-wide association study of CIN3/ICC in unrelated participants of European ancestry.** The observed p-value of association between each variant and the cervical cancer outcome (Y-axis) is represented as a function of the expected p-value under the assumption of their uniform distribution (X-axis). The red line represents perfect agreement between the observed and expected values. Findings are reported for the whole genome (A, N=9,600,464 variants) and excluding the extended HLA region (B, N=651,104 variants). The Lambda is annotated, which is the ratio of the median empirically observed distribution of the  $P$ -value to the expected.



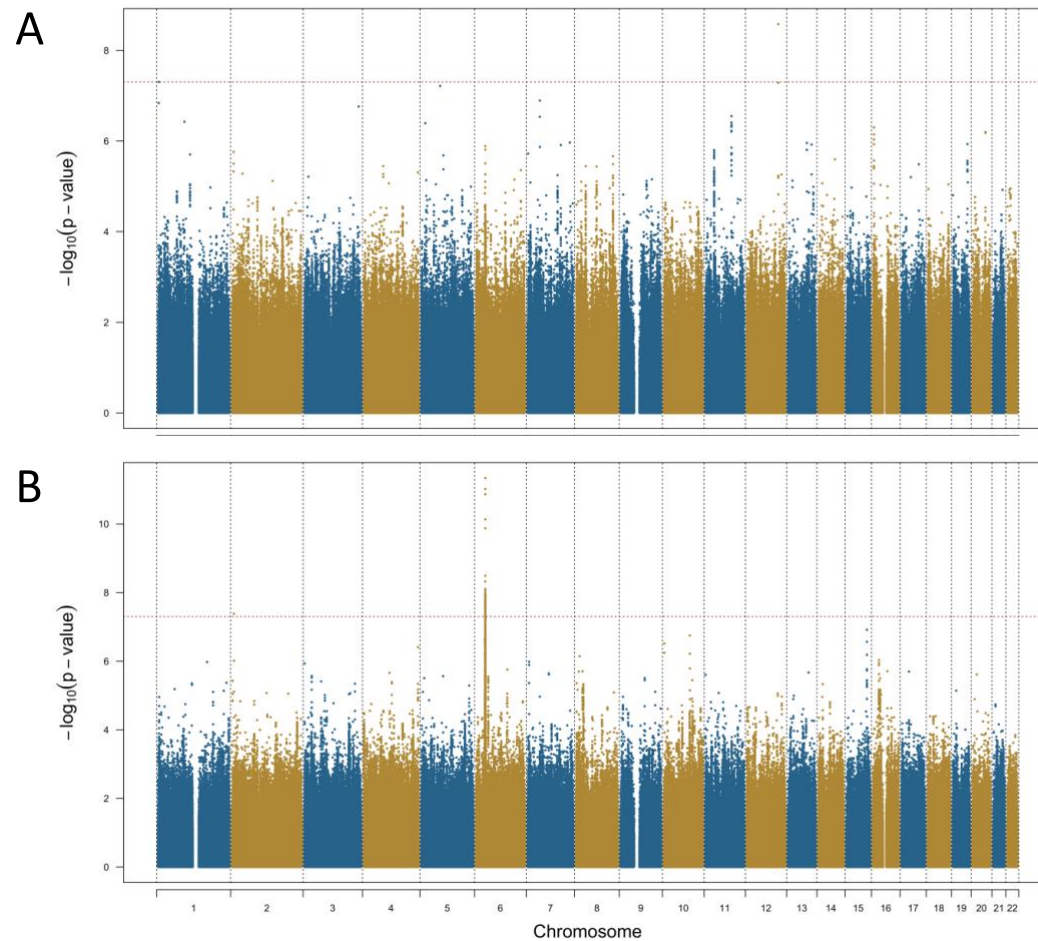

**Supplementary Figure 3. Manhattan plots showing the associations between genetic variants and ICC (A, N=764 cases and N=146,178 controls) or CIN3 status (B, subset of N=764 cases and N=146,178 controls) in the European unrelated population.** Genetic variants (N=9,600,464) are ordered by their position on the genome (X-axis). The p-values, measuring the strength of association, are derived from additive logistic models and are represented on the  $-\log_{10}$  scale (Y-axis). The genome-wide significance level is set to  $5 \times 10^{-8}$  (horizontal red line).

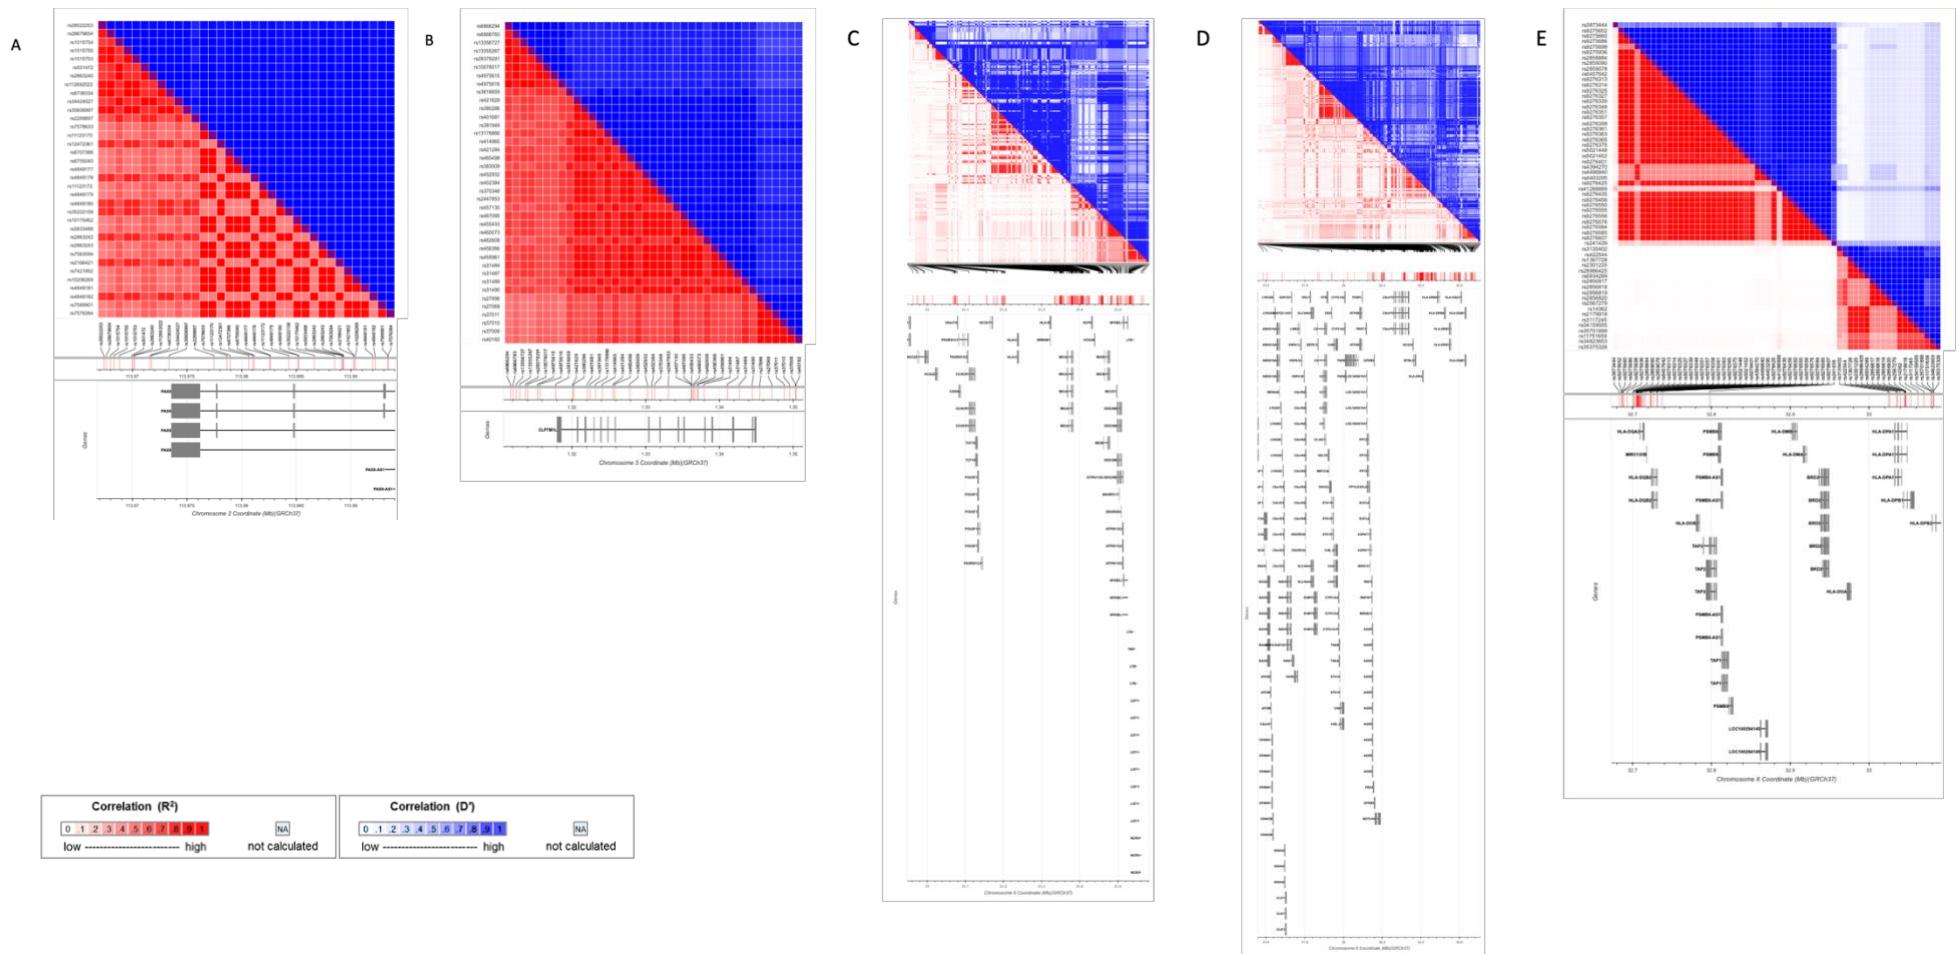

**Supplementary Figure 4. Heatmap of pairwise linkage disequilibrium statistics** between genome-wide significant variants ( $p < 5 \times 10^{-8}$ ) with imputation scores above 0.95 in chromosome 2 (A), chromosome 5 (for  $p < 10^{-6}$ , B), and chromosome 6 separated by LD block (C, D, E). The  $r$ -squared (red) and correlations (blue) have been generated using LDlink on reference British population from the 1K genome project. Exons of corresponding transcripts and gene name are also displayed.

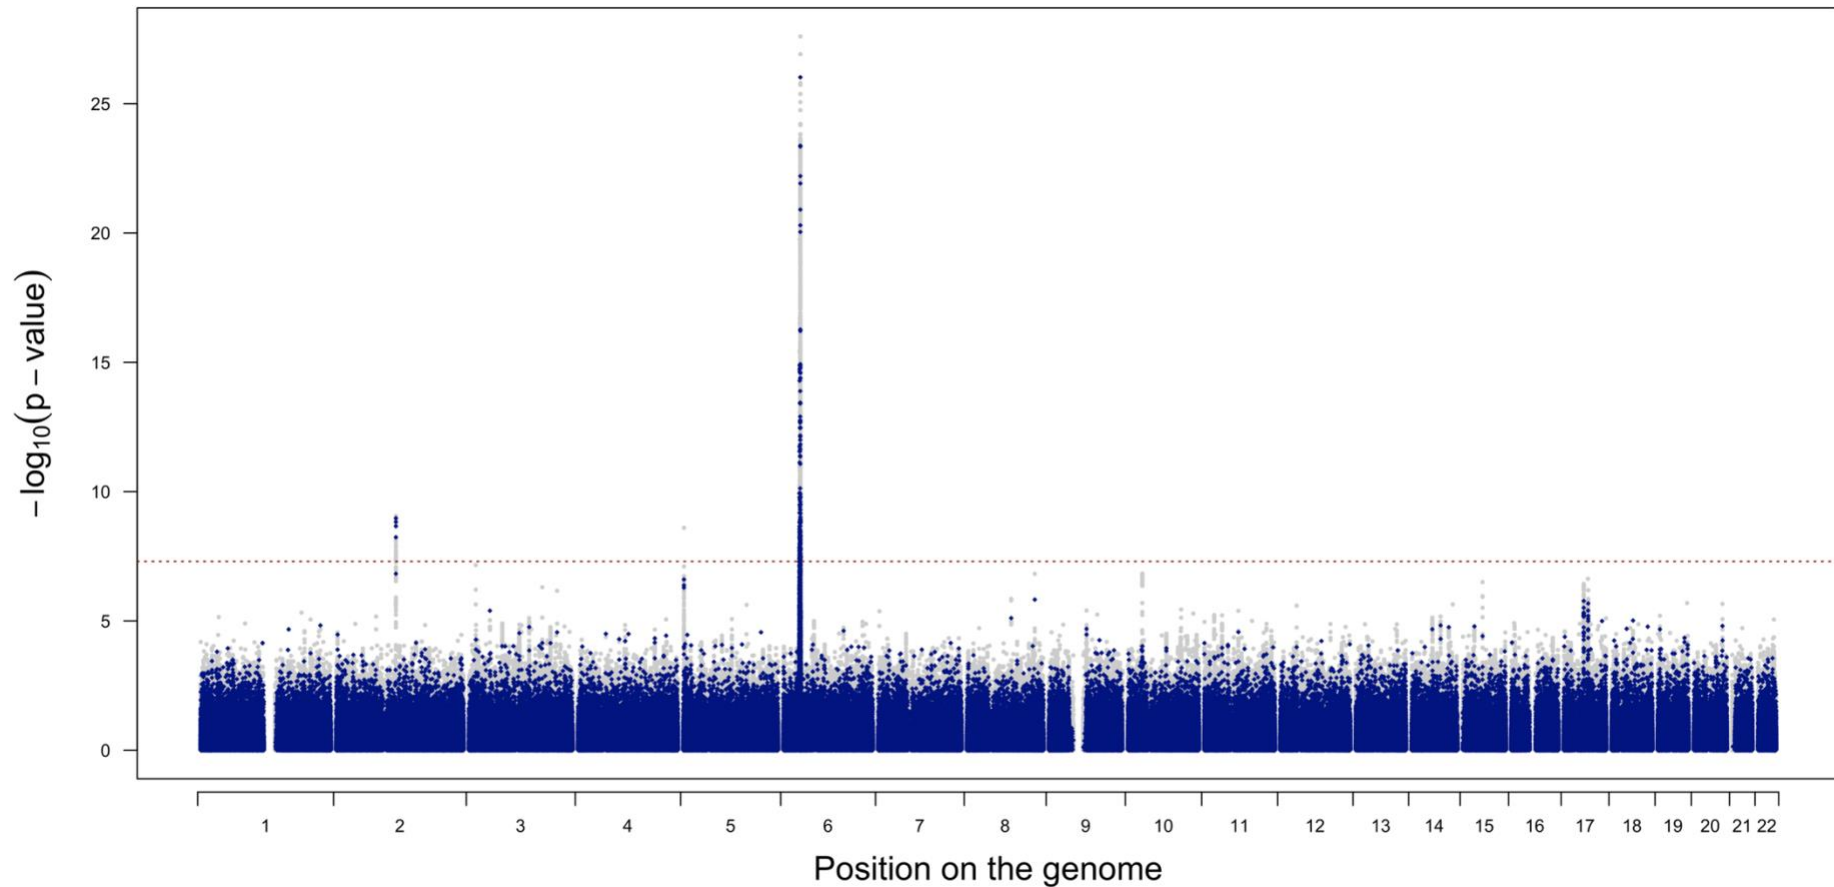

**Supplementary Figure 5.** Manhattan plots showing the associations between genetic variants and cervical cancer status in the European unrelated population (N=4,797 cases, of which 764 ICC, vs N=146,178 controls). Genetic variants are ordered by their position on the genome (X-axis). The p-values, measuring the strength of association, are derived from additive logistic models and are represented on the  $-\log_{10}$  scale (Y-axis). The genome-wide significance level is set to  $5 \times 10^{-8}$  (horizontal red line). Results are presented for all the (N=9,600,464) genotyped and imputed variants (grey), and the (N=656,284) genotyped only variants (blue).

A

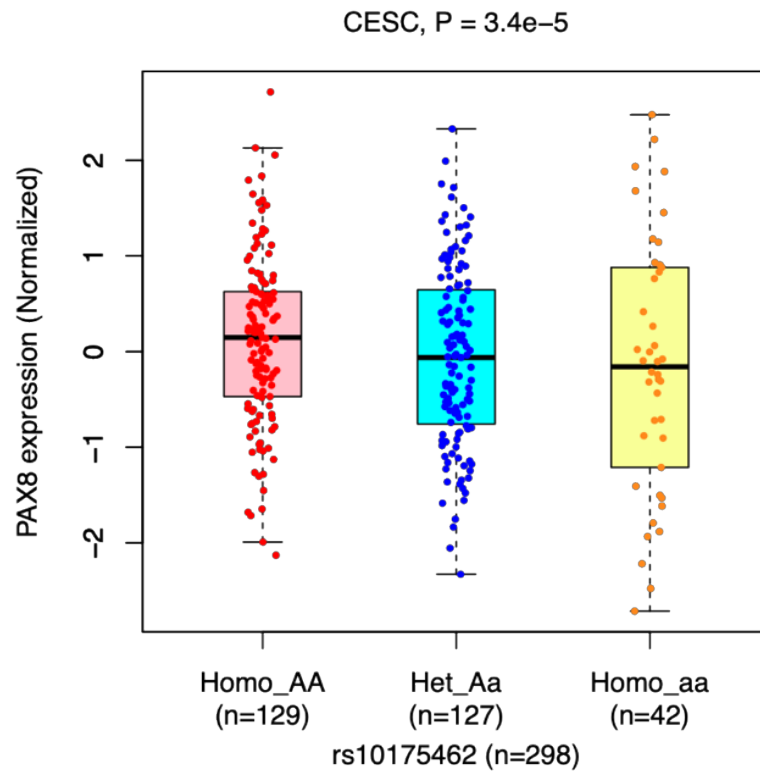

B

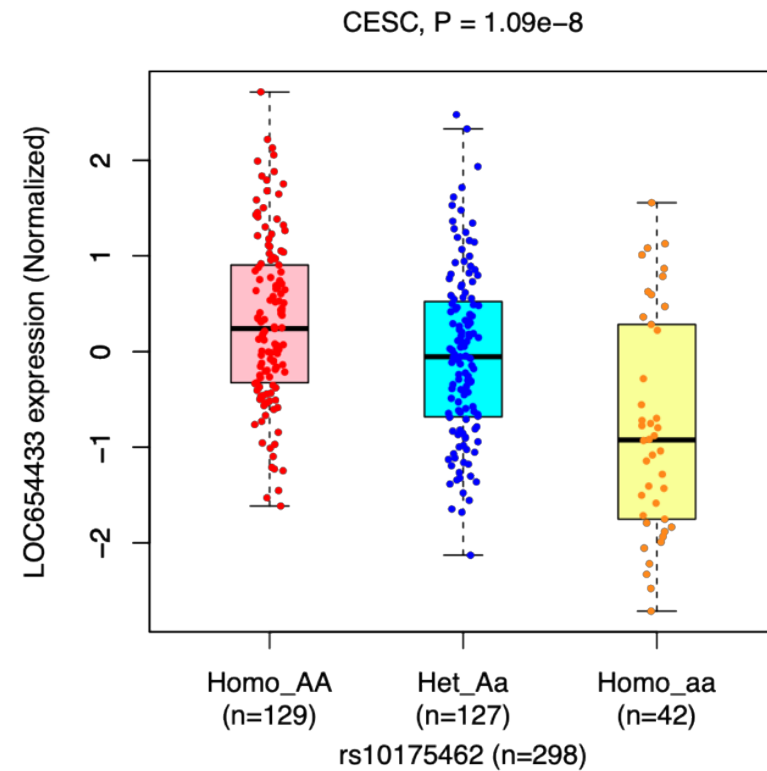

**Supplementary Figure 6.** Significant SNPs were annotated for their effect on eQTL ratios in ICC from the PanCanQTL database. Box plots show the gene expression levels in PAX8 (A) and LOC654433 (B) genes, for 298 cervical cancer tissue samples for the three genotypes at rs10175462. Overall p-value for differential expression, as computed from an additive linear model (performed using Matrix eQTL), is given above the plot. Homozygosity for the T allele was associated with decreased gene expression at PAX8 and LOC654433. The T allele in the discovery set conferred a decreased risk of cervical cancer trait for PAX8 (OR=0.873; SE = -6.05;  $P = 1.41e-9$ ) and LOC654433 (OR=0.670; SE = -5.90;  $P = 1.09e-8$ ). Abbreviations: CESC: cervical squamous cell cancer tissue; Homo: homozygous; Het: heterozygous.

## **5 FINNGEN CONTRIBUTORS (RELEASE 5)**

### **Steering Committee**

Aarno Palotie Institute for Molecular Medicine Finland, HiLIFE, University of Helsinki, Finland

Mark Daly Institute for Molecular Medicine Finland, HiLIFE, University of Helsinki, Finland

### **Pharmaceutical companies**

Howard Jacob Abbvie, Chicago, IL, United States

Athena Matakidou Astra Zeneca, Cambridge, United Kingdom

Heiko Runz Biogen, Cambridge, MA, United States

Sally John Biogen, Cambridge, MA, United States

Robert Plenge Celgene, Summit, NJ, United States

Mark McCarthy Genentech, San Francisco, CA, United States

Julie Hunkapiller Genentech, San Francisco, CA, United States

Meg Ehm GlaxoSmithKline, Brentford, United Kingdom

Dawn Waterworth GlaxoSmithKline, Brentford, United Kingdom

Caroline Fox Merck, Kenilworth, NJ, United States

Anders Malarstig Pfizer, New York, NY, United States

Kathy Klinger Sanofi, Paris, France

Kathy Call Sanofi, Paris, France

Tim Behrens Maze Therapeutics, San Francisco, CA, United States

Patrick Loerch Janssen Biotech, Beerse, Belgium

### **University of Helsinki & Biobanks**

Tomi Mäkelä HiLIFE, University of Helsinki, Finland, Finland

Jaakko Kaprio Institute for Molecular Medicine Finland, HiLIFE, Helsinki, Finland, Finland

Petri Virolainen Auria Biobank / University of Turku / Hospital District of Southwest Finland, Turku, Finland

Kari Pulkki Auria Biobank / University of Turku / Hospital District of Southwest Finland, Turku, Finland

Terhi Kilpi THL Biobank / The National Institute of Health and Welfare Helsinki,  
Finland

Markus Perola THL Biobank / The National Institute of Health and Welfare Helsinki,  
Finland

Jukka Partanen Finnish Red Cross Blood Service / Finnish Hematology Registry and Clinical  
Biobank, Helsinki, Finland

Anne Pitkäranta Helsinki Biobank / Helsinki University and Hospital District of  
Helsinki and Uusimaa, Helsinki

Riitta Kaarteenaho Northern Finland Biobank Borealis / University of Oulu / Northern  
Ostrobothnia Hospital District, Oulu, Finland

Seppo Vainio Northern Finland Biobank Borealis / University of Oulu / Northern  
Ostrobothnia Hospital District, Oulu, Finland

Miia Turpeinen Northern Finland Biobank Borealis / University of Oulu / Northern  
Ostrobothnia Hospital

Raisa Serpi Northern Finland Biobank Borealis / University of Oulu / Northern  
Ostrobothnia Hospital

Tarja Laitinen Finnish Clinical Biobank Tampere / University of Tampere / Pirkanmaa  
Hospital District, Tampere, Finland

Johanna Mäkelä Finnish Clinical Biobank Tampere / University of Tampere / Pirkanmaa  
Hospital District, Tampere, Finland

Veli-Matti Kosma Biobank of Eastern Finland / University of Eastern Finland / Northern Savo  
Hospital District, Kuopio, Finland

Urho Kujala Central Finland Biobank / University of Jyväskylä / Central Finland Health  
Care District, Jyväskylä, Finland

**Other Experts/ Non-Voting Members**

Outi Tuovila Business Finland, Helsinki, Finland

Minna Hendolin Business Finland, Helsinki, Finland

Raimo Pakkanen Business Finland, Helsinki, Finland

## **Scientific Committee**

### **Pharmaceutical companies**

|                      |                                                     |
|----------------------|-----------------------------------------------------|
| Jeff Waring          | Abbvie, Chicago, IL, United States                  |
| Bridget Riley-Gillis | Abbvie, Chicago, IL, United States                  |
| Athena Matakidou     | Astra Zeneca, Cambridge, United Kingdom             |
| Heiko Runz           | Biogen, Cambridge, MA, United States                |
| Jimmy Liu            | Biogen, Cambridge, MA, United States                |
| Shameek Biswas       | Celgene, Summit, NJ, United States                  |
| Julie Hunkapiller    | Genentech, San Francisco, CA, United States         |
| Dawn Waterworth      | GlaxoSmithKline, Brentford, United Kingdom          |
| Meg Ehm              | GlaxoSmithKline, Brentford, United Kingdom          |
| Dorothee Diogo       | Merck, Kenilworth, NJ, United States                |
| Caroline Fox         | Merck, Kenilworth, NJ, United States                |
| Anders Malarstig     | Pfizer, New York, NY, United States                 |
| Catherine Marshall   | Pfizer, New York, NY, United States                 |
| Xinli Hu             | Pfizer, New York, NY, United States                 |
| Kathy Call           | Sanofi, Paris, France                               |
| Kathy Klinger        | Sanofi, Paris, France                               |
| Matthias Gossel      | Sanofi, Paris, France                               |
| Robert Graham        | Maze Therapeutics, San Francisco, CA, United States |
| Tim Behrens          | Maze Therapeutics, San Francisco, CA, United States |
| Beryl Cummings       | Maze Therapeutics, San Francisco, CA, United States |
| Wilco Fleuren        | Janssen Biotech, Beerse, Belgium                    |

### **University of Helsinki & Biobanks**

|                    |                                                                                            |
|--------------------|--------------------------------------------------------------------------------------------|
| Samuli Ripatti     | Institute for Molecular Medicine Finland, HiLIFE, Helsinki, Finland                        |
| Johanna Schleutker | Auria Biobank / Univ. of Turku / Hospital District of Southwest Finland,<br>Turku, Finland |

Markus Perola THL Biobank / The National Institute of Health and Welfare Helsinki,  
Finland

Mikko Arvas Finnish Red Cross Blood Service / Finnish Hematology Registry and Clinical  
Biobank, Helsinki, Finland

Olli Carpén Helsinki Biobank / Helsinki University and Hospital District of Helsinki and  
Uusimaa, Helsinki

Reetta Hinttala Northern Finland Biobank Borealis / University of Oulu / Northern  
Ostrobothnia Hospital District, Oulu, Finland

Johannes Kettunen Northern Finland Biobank Borealis / University of Oulu / Northern  
Ostrobothnia Hospital District, Oulu, Finland

Johanna Mäkelä Finnish Clinical Biobank Tampere / University of Tampere / Pirkanmaa  
Hospital District, Tampere, Finland

Arto Mannermaa Biobank of Eastern Finland / University of Eastern Finland /  
Northern Savo Hospital District, Kuopio, Finland

Jari Laukkanen Central Finland Biobank / University of Jyväskylä / Central Finland Health  
Care District, Jyväskylä, Finland

Urho Kujala Central Finland Biobank / University of Jyväskylä / Central Finland Health  
Care District, Jyväskylä, Finland

### **Other Experts/ Non-Voting Members**

Outi Tuovila Business Finland, Helsinki, Finland

Minna Hendolin Business Finland, Helsinki, Finland

Raimo Pakkanen Business Finland, Helsinki, Finland

### **Clinical Groups**

#### **Oncology Group**

Heikki Joensuu Hospital District of Helsinki and Uusimaa, Helsinki, Finland

Olli Carpén Hospital District of Helsinki and Uusimaa, Helsinki, Finland

Tuomo Meretoja Hospital District of Helsinki and Uusimaa, Helsinki, Finland



|                      |                                                              |
|----------------------|--------------------------------------------------------------|
| Lauri Aaltonen       | Hospital District of Helsinki and Uusimaa, Helsinki, Finland |
| Johanna Mattson      | Hospital District of Helsinki and Uusimaa, Helsinki, Finland |
| Johanna Schleutker   | University of Turku, Turku, Finland                          |
| Annika Auranen       | Pirkanmaa Hospital District , Tampere, Finland               |
| Peeter Karihtala     | Northern Ostrobothnia Hospital District, Oulu, Finland       |
| Saila Kauppila       | Northern Ostrobothnia Hospital District, Oulu, Finland       |
| Päivi Auvinen        | Northern Savo Hospital District, Kuopio, Finland             |
| Klaus Elenius        | Hospital District of Southwest Finland, Turku, Finland       |
| Relja Popovic        | Abbvie, Chicago, IL, United States                           |
| Jeffrey Waring       | Abbvie, Chicago, IL, United States                           |
| Bridget Riley-Gillis | Abbvie, Chicago, IL, United States                           |
| Anne Lehtonen        | Abbvie, Chicago, IL, United States                           |
| Athena Matakidou     | Astra Zeneca, Cambridge, United Kingdom                      |
| Jennifer Schutzman   | Genentech, San Francisco, CA, United States                  |
| Julie Hunkapiller    | Genentech, San Francisco, CA, United States                  |
| Natalie Bowers       | Genentech, San Francisco, CA, United States                  |
| John Michon          | Genentech, San Francisco, CA, United States                  |
| Vinay Mehta          | Merck, Kenilworth, NJ, United States                         |
| Andrey Loboda        | Merck, Kenilworth, NJ, United States                         |
| Aparna Chhibber      | Merck, Kenilworth, NJ, United States                         |
| Heli Lehtonen        | Pfizer, New York, NY, United States                          |
| Stefan McDonough     | Pfizer, New York, NY, United States                          |
| Marika Crohns        | Sanofi, Paris, France                                        |
| Diptee Kulkarni      | GlaxoSmithKline, Brentford, United Kingdom                   |

**FinnGen Analysis working group**

|                      |                                    |
|----------------------|------------------------------------|
| Justin Wade Davis    | Abbvie, Chicago, IL, United States |
| Bridget Riley-Gillis | Abbvie, Chicago, IL, United States |

|                                |                                             |
|--------------------------------|---------------------------------------------|
| Danjuma Quarless               | Abbvie, Chicago, IL, United States          |
| Fedik Rahimov                  | Abbvie, Chicago, IL, United States          |
| Sahar Esmaeeli                 | Abbvie, Chicago, IL, United States          |
| Slavé Petrovski                | Astra Zeneca, Cambridge, United Kingdom     |
| Eleonor Wigmore                | Astra Zeneca, Cambridge, United Kingdom     |
| Jimmy Liu                      | Biogen, Cambridge, MA, United States        |
| Chia-Yen Chen                  | Biogen, Cambridge, MA, United States        |
| Paola Bronson                  | Biogen, Cambridge, MA, United States        |
| Ellen Tsai                     | Biogen, Cambridge, MA, United States        |
| Stephanie Loomis               | Biogen, Cambridge, MA, United States        |
| Yunfeng Huang                  | Biogen, Cambridge, MA, United States        |
| Joseph Maranville              | Celgene, Summit, NJ, United States          |
| Shameek Biswas                 | Celgene, Summit, NJ, United States          |
| Elmutaz Shaikho Elhaj Mohammed | Celgene, Summit, NJ, United States          |
| Samir Wadhawan                 | Bristol-Meyers-Squibb                       |
| Erika Kvikstad                 | Bristol-Meyers-Squibb                       |
| Minal Caliskan                 | Bristol-Meyers-Squibb                       |
| Diana Chang                    | Genentech, San Francisco, CA, United States |
| Julie Hunkapiller              | Genentech, San Francisco, CA, United States |
| Tushar Bhangale                | Genentech, San Francisco, CA, United States |
| Natalie Bowers                 | Genentech, San Francisco, CA, United States |
| Sarah Pendergrass              | Genentech, San Francisco, CA, United States |
| Dorothee Diogo                 | Merck, Kenilworth, NJ, United States        |
| Emily Holzinger                | Merck, Kenilworth, NJ, United States        |
| Padhraig Gormley               | Merck, Kenilworth, NJ, United States        |
| Xing Chen                      | Pfizer, New York, NY, United States         |
| Åsa Hedman                     | Pfizer, New York, NY, United States         |
| Karen S King                   | GlaxoSmithKline, Brentford, United Kingdom  |
| Clarence Wang                  | Sanofi, Paris, France                       |

|                             |                                                                                                                                      |
|-----------------------------|--------------------------------------------------------------------------------------------------------------------------------------|
| Ethan Xu                    | Sanofi, Paris, France                                                                                                                |
| Franck Auge                 | Sanofi, Paris, France                                                                                                                |
| Clement Chatelain           | Sanofi, Paris, France                                                                                                                |
| Deepak Rajpal               | Sanofi, Paris, France                                                                                                                |
| Dongyu Liu                  | Sanofi, Paris, France                                                                                                                |
| Katherine Call              | Sanofi, Paris, France                                                                                                                |
| Tai-he Xia                  | Sanofi, Paris, France                                                                                                                |
| Beryl Cummings              | Maze Therapeutics, San Francisco, CA, United States                                                                                  |
| Matt Brauer                 | Maze Therapeutics, San Francisco, CA, United States                                                                                  |
| Mitja Kurki                 | Institute for Molecular Medicine Finland, HiLIFE, University of Helsinki,<br>Finland / Broad Institute, Cambridge, MA, United States |
| Samuli Ripatti              | Institute for Molecular Medicine Finland, HiLIFE, University of Helsinki,<br>Finland                                                 |
| Mark Daly                   | Institute for Molecular Medicine Finland, HiLIFE, University of Helsinki,<br>Finland                                                 |
| Juha Karjalainen            | Institute for Molecular Medicine Finland, HiLIFE, University of<br>Helsinki, Finland / Broad Institute, Cambridge, MA, United States |
| Aki Havulinna               | Institute for Molecular Medicine Finland, HiLIFE, University of Helsinki,<br>Finland                                                 |
| Anu Jalanko                 | Institute for Molecular Medicine Finland, HiLIFE, University of Helsinki,<br>Finland                                                 |
| Priit Palta                 | Institute for Molecular Medicine Finland, HiLIFE, University of Helsinki,<br>Finland                                                 |
| Pietro della Briotta Parolo | Institute for Molecular Medicine Finland, HiLIFE, University of<br>Helsinki, Finland                                                 |
| Wei Zhou                    | Broad Institute, Cambridge, MA, United States                                                                                        |
| Susanna Lemmelä             | Institute for Molecular Medicine Finland, HiLIFE, University of Helsinki,<br>Finland                                                 |
| Manuel Rivas                | University of Stanford, Stanford, CA, United States                                                                                  |

Jarmo Harju Institute for Molecular Medicine Finland, HiLIFE, University of Helsinki,  
Finland

Aarno Palotie Institute for Molecular Medicine Finland, HiLIFE, University of Helsinki,  
Finland

Arto Lehisto Institute for Molecular Medicine Finland, HiLIFE, University of Helsinki,  
Finland

Andrea Ganna Institute for Molecular Medicine Finland, HiLIFE, University of Helsinki,  
Finland

Vincent Llorens Institute for Molecular Medicine Finland, HiLIFE, University of  
Helsinki, Finland

Hannele Laivuori Institute for Molecular Medicine Finland, HiLIFE, University of  
Helsinki, Finland

Sina Rüeger Institute for Molecular Medicine Finland, HiLIFE, University of Helsinki,  
Finland

Mari E Niemi Institute for Molecular Medicine Finland, HiLIFE, University of Helsinki,  
Finland

Taru Tukiainen Institute for Molecular Medicine Finland, HiLIFE, University of Helsinki,  
Finland

Mary Pat Reeve Institute for Molecular Medicine Finland, HiLIFE, University of Helsinki,  
Finland

Henrike Heyne Institute for Molecular Medicine Finland, HiLIFE, University of Helsinki,  
Finland

Nina Mars Institute for Molecular Medicine Finland, HiLIFE, University of Helsinki,  
Finland

Kimmo Palin University of Helsinki, Helsinki, Finland

Javier Garcia-Tabuena University of Tampere, Tampere, Finland

Harri Siirtola University of Tampere, Tampere, Finland

Tuomo Kiiskinen Institute for Molecular Medicine Finland, HiLIFE, University of  
Helsinki, Finland

Jiwoo Lee Institute for Molecular Medicine Finland, HiLIFE, University of Helsinki,  
Finland / Broad Institute, Cambridge, MA, United States

Kristin Tsuo Institute for Molecular Medicine Finland, HiLIFE, University of Helsinki,  
Finland / Broad Institute, Cambridge, MA, United States

Amanda Elliott Institute for Molecular Medicine Finland, HiLIFE, University of Helsinki,  
Finland / Broad Institute, Cambridge, MA, United States

Kati Kristiansson THL Biobank / The National Institute of Health and Welfare Helsinki, Finland

Mikko Arvas Finnish Red Cross Blood Service, Helsinki, Finland

Kati Hyvärinen Finnish Red Cross Blood Service, Helsinki, Finland

Jarmo Ritari Finnish Red Cross Blood Service, Helsinki, Finland

Miika Koskinen Helsinki Biobank / Helsinki University and Hospital District of  
Helsinki and Uusimaa, Helsinki

Olli Carpén Helsinki Biobank / Helsinki University and Hospital District of Helsinki and  
Uusimaa, Helsinki

Johannes Kettunen Northern Finland Biobank Borealis / University of Oulu / Northern  
Ostrobothnia Hospital District, Oulu, Finland

Katri Pylkäs Northern Finland Biobank Borealis / University of Oulu / Northern  
Ostrobothnia Hospital District, Oulu, Finland

Marita Kalaoja Northern Finland Biobank Borealis / University of Oulu / Northern  
Ostrobothnia Hospital District, Oulu, Finland

Minna Karjalainen Northern Finland Biobank Borealis / University of Oulu / Northern  
Ostrobothnia Hospital District, Oulu, Finland

Tuomo Mantere Northern Finland Biobank Borealis / University of Oulu / Northern  
Ostrobothnia Hospital District, Oulu, Finland

Eeva Kangasniemi Finnish Clinical Biobank Tampere / University of Tampere / Pirkanmaa  
Hospital District, Tampere, Finland

Sami Heikkinen Biobank of Eastern Finland / University of Eastern Finland / Northern  
Savo Hospital District, Kuopio, Finland

Arto Mannermaa                      Biobank of Eastern Finland / University of Eastern Finland / Northern Savo Hospital District, Kuopio, Finland

Eija Laakkonen                      Central Finland Biobank / University of Jyväskylä / Central Finland Health Care District, Jyväskylä, Finland

Csilla                      Sipeky                      University of Turku, Turku, Finland

Samuel Heron                      University of Turku, Turku, Finland

Antti Karlsson                      Auria Biobank / University of Turku / Hospital District of Southwest Finland, Turku, Finland

Dhanaprakash Jambulingam      University of Turku, Turku, Finland

Venkat Subramaniam Rathinakannan      University of Turku, Turku, Finland

#### **Biobank directors**

Lila Kallio                      Auria Biobank / University of Turku / Hospital District of Southwest Finland, Turku, Finland

Sirpa Soini                      THL Biobank / The National Institute of Health and Welfare Helsinki, Finland

Jukka Partanen                      Finnish Red Cross Blood Service / Finnish Hematology Registry and Clinical Biobank, Helsinki, Finland

Eero Punkka                      Helsinki Biobank / Helsinki University and Hospital District of Helsinki and Uusimaa, Helsinki

Raisa Serpi                      Northern Finland Biobank Borealis / University of Oulu / Northern Ostrobothnia Hospital District, Oulu, Finland

Johanna Mäkelä                      Finnish Clinical Biobank Tampere / University of Tampere / Pirkanmaa Hospital District, Tampere, Finland

Veli-Matti Kosma                      Biobank of Eastern Finland / University of Eastern Finland / Northern Savo Hospital District, Kuopio, Finland

Teijo Kuopio                      Central Finland Biobank / University of Jyväskylä / Central Finland Health Care District, Jyväskylä, Finland

## **FinnGen Teams**

### **Administration**

Anu Jalanko Institute for Molecular Medicine Finland, HiLIFE, University of Helsinki,  
Finland

Risto Kajanne Institute for Molecular Medicine Finland, HiLIFE, University of Helsinki,  
Finland

Mervi Aavikko Institute for Molecular Medicine Finland, HiLIFE, University of Helsinki,  
Finland

Manuel González Jiménez Institute for Molecular Medicine Finland, HiLIFE, University of Helsinki,  
Finland

### **Analysis**

Mitja Kurki Institute for Molecular Medicine Finland, HiLIFE, University of Helsinki,  
Finland / Broad Institute, Cambridge, MA, United States

Juha Karjalainen Institute for Molecular Medicine Finland, HiLIFE, University of  
Helsinki, Finland / Broad Institute, Cambridge, MA, United States

Pietro della Briotta Parola Institute for Molecular Medicine Finland, HiLIFE, University of  
Helsinki, Finland

Sina Rüeger Institute for Molecular Medicine Finland, HiLIFE, University of Helsinki,  
Finland

Arto Lehistö Institute for Molecular Medicine Finland, HiLIFE, University of Helsinki,  
Finland

Wei Zhou Broad Institute, Cambridge, MA, United States

Masahiro Kanai Broad Institute, Cambridge, MA, United States

### **Clinical Endpoint Development**

Hannele Laivuori Institute for Molecular Medicine Finland, HiLIFE, University of Helsinki,  
Finland

Aki Havulinna Institute for Molecular Medicine Finland, HiLIFE, University of Helsinki,  
Finland

Susanna Lemmelä Institute for Molecular Medicine Finland, HiLIFE, University of Helsinki,  
Finland

Tuomo Kiiskinen Institute for Molecular Medicine Finland, HiLIFE, University of Helsinki,  
Finland

### **Communication**

Mari Kaunisto Institute for Molecular Medicine Finland, HiLIFE, University of Helsinki,  
Finland

### **Data Management and IT Infrastructure**

Jarmo Harju Institute for Molecular Medicine Finland, HiLIFE, University of Helsinki,  
Finland

Elna Kilpeläinen Institute for Molecular Medicine Finland, HiLIFE, University of Helsinki,  
Finland

Timo P. Sipilä Institute for Molecular Medicine Finland, HiLIFE, University of Helsinki,  
Finland

Georg Brein Institute for Molecular Medicine Finland, HiLIFE, University of Helsinki,

Finland Oluwaseun A. Dada Institute for Molecular Medicine Finland, HiLIFE, University of  
Helsinki, Finland

Ghazal Awaisa Institute for Molecular Medicine Finland, HiLIFE, University of Helsinki,  
Finland

Anastasia Shcherban Institute for Molecular Medicine Finland, HiLIFE, University of Helsinki,  
Finland

### **Genotyping**

Kati Donner Institute for Molecular Medicine Finland, HiLIFE, University of Helsinki,  
Finland

Timo P. Sipilä Institute for Molecular Medicine Finland, HiLIFE, University of Helsinki,  
Finland

### **Sample Collection Coordination**



Anu Loukola Helsinki Biobank / Helsinki University and Hospital District of Helsinki and Uusimaa, Helsinki

### **Sample Logistics**

Päivi Laiho THL Biobank / The National Institute of Health and Welfare Helsinki, Finland

Tuuli Sistonen THL Biobank / The National Institute of Health and Welfare Helsinki, Finland

Essi Kaiharju THL Biobank / The National Institute of Health and Welfare Helsinki, Finland

Markku Laukkanen THL Biobank / The National Institute of Health and Welfare Helsinki, Finland

Elina Järvensivu THL Biobank / The National Institute of Health and Welfare Helsinki, Finland

Sini Lähteenmäki THL Biobank / The National Institute of Health and Welfare Helsinki, Finland

Lotta Männikkö THL Biobank / The National Institute of Health and Welfare Helsinki, Finland

Regis Wong THL Biobank / The National Institute of Health and Welfare Helsinki, Finland

### **Registry Data Operations**

Hannele Mattsson THL Biobank / The National Institute of Health and Welfare Helsinki, Finland

Kati Kristiansson THL Biobank / The National Institute of Health and Welfare Helsinki, Finland

Susanna Lemmelä Institute for Molecular Medicine Finland, HiLIFE, University of Helsinki, Finland

Tero Hiekkalinna THL Biobank / The National Institute of Health and Welfare Helsinki, Finland

Teemu Paajanen THL Biobank / The National Institute of Health and Welfare Helsinki, Finland

### **Sequencing Informatics**

Priit Palta                    Institute for Molecular Medicine Finland, HiLIFE, University of Helsinki,  
Finland

Kalle Pärn                    Institute for Molecular Medicine Finland, HiLIFE, University of Helsinki,  
Finland

### **Trajectory Team**

Tarja Laitinen                Pirkanmaa Hospital District, Tampere, Finland

Harri Siirtola                University of Tampere, Tampere, Finland

Javier Gracia-Tabuenca    University of Tampere, Tampere, Finland

## 6 References

1. Biobank TU. UK Biobank: Protocol for a Large-Scale Prospective Epidemiological Resource. 2007. <http://www.ukbiobank.ac.uk/wp-content/uploads/2011/11/UK-Biobank-Protocol.pdf>.
2. UK Biobank. UK Biobank Axiom® Array: Datasheet. 2018. <http://www.ukbiobank.ac.uk/wp-content/uploads/2014/04/UK-Biobank-Axiom-Array-Datasheet-2014-1.pdf> (accessed 26/06/2020).
3. Bycroft C, Freeman C, Petkova D, et al. The UK Biobank resource with deep phenotyping and genomic data. *Nature* 2018; **562**(7726): 203-9.
4. Biobank TU. Genotyping and Quality Control of UK Biobank, a Large-Scale, Extensively Phenotyped Prospective Resource. 2015. [http://biobank.ctsu.ox.ac.uk/crystal/docs/genotyping\\_qc.pdf](http://biobank.ctsu.ox.ac.uk/crystal/docs/genotyping_qc.pdf).
5. Tsukiyama SI, M; Ariyoshi, H; Shirawaka, I. A new algorithm for generating all the maximal independent sets. . *SIAM J Computing* 1977; **6**: 505-17.
6. Bowden J, Davey Smith G, Haycock PC, Burgess S. Consistent Estimation in Mendelian Randomization with Some Invalid Instruments Using a Weighted Median Estimator. *Genet Epidemiol* 2016; **40**(4): 304-14.
7. Verbanck M, Chen CY, Neale B, Do R. Detection of widespread horizontal pleiotropy in causal relationships inferred from Mendelian randomization between complex traits and diseases. *Nat Genet* 2018; **50**(5): 693-8.
8. Burgess S, Thompson SG. Multivariable Mendelian randomization: the use of pleiotropic genetic variants to estimate causal effects. *Am J Epidemiol* 2015; **181**(4): 251-60.
9. Barban N, Jansen R, de Vlaming R, et al. Genome-wide analysis identifies 12 loci influencing human reproductive behavior. *Nat Genet* 2016; **48**(12): 1462-72.
10. Wootton RE, Richmond RC, Stuijzand BG, et al. Evidence for causal effects of lifetime smoking on risk for depression and schizophrenia: a Mendelian randomisation study. *Psychol Med* 2019: 1-9.
11. Karlsson Linnér R, Biroli P, Kong E, et al. Genome-wide association analyses of risk tolerance and risky behaviors in over 1 million individuals identify hundreds of loci and shared genetic influences. *Nat Genet* 2019; **51**(2): 245-57.
12. Purcell S, Neale B, Todd-Brown K, et al. PLINK: a toolset for whole-genome association and population-based linkage analysis. *American Journal of Human Genetics* 2007; **81**.
13. Buniello A, MacArthur JAL, Cerezo M, et al. The NHGRI-EBI GWAS Catalog of published genome-wide association studies, targeted arrays and summary statistics 2019. *Nucleic Acids Res* 2019; **47**(D1): D1005-D12.
14. Kamat MA, Blackshaw JA, Young R, et al. PhenoScanner V2: an expanded tool for searching human genotype-phenotype associations. *Bioinformatics* 2019; **35**(22): 4851-3.
15. Haussler M, Zweig AS, Tyner C, et al. The UCSC Genome Browser database: 2019 update. *Nucleic Acids Res* 2019; **47**(D1): D853-D8.

16. Sherry ST, Ward MH, Kholodov M, et al. dbSNP: the NCBI database of genetic variation. *Nucleic Acids Res* 2001; **29**(1): 308-11.
17. Davis CA, Hitz BC, Sloan CA, et al. The Encyclopedia of DNA elements (ENCODE): data portal update. *Nucleic Acids Res* 2018; **46**(D1): D794-D801.
18. Gong J, Mei S, Liu C, et al. PancanQTL: systematic identification of cis-eQTLs and trans-eQTLs in 33 cancer types. *Nucleic Acids Res* 2018; **46**(D1): D971-D6.
19. The Genotype-Tissue Expression (GTEx) project. *Nat Genet* 2013; **45**(6): 580-5.
20. Forbes S, Clements J, Dawson E, et al. COSMIC 2005. *Br J Cancer* 2006; **94**(2): 318-22.
21. Ward LD, Kellis M. HaploReg v4: systematic mining of putative causal variants, cell types, regulators and target genes for human complex traits and disease. *Nucleic Acids Res* 2016; **44**(D1): D877-81.
22. Astle WJ, Elding H, Jiang T, et al. The Allelic Landscape of Human Blood Cell Trait Variation and Links to Common Complex Disease. *Cell* 2016; **167**(5): 1415-29 e19.
23. Kelemen LE, Lawrenson K, Tyrer J, et al. Genome-wide significant risk associations for mucinous ovarian carcinoma. *Nat Genet* 2015; **47**(8): 888-97.
24. Wang Y, Wang Y, Li J, et al. PAX8: a sensitive and specific marker to identify cancer cells of ovarian origin for patients prior to neoadjuvant chemotherapy. *Journal of Hematology & Oncology* 2013; **6**(1): 60.
25. Wang W, Yue Z, Tian Z, et al. Expression of Yin Yang 1 in cervical cancer and its correlation with E-cadherin expression and HPV16 E6. *PLoS One* 2018; **13**(2): e0193340.
26. Tian C, Hromatka BS, Kiefer AK, et al. Genome-wide association and HLA region fine-mapping studies identify susceptibility loci for multiple common infections. *Nat Commun* 2017; **8**(1): 599.
27. Lesueur C, Diergaard B, Olshan AF, et al. Genome-wide association analyses identify new susceptibility loci for oral cavity and pharyngeal cancer. *Nat Genet* 2016; **48**(12): 1544-50.
28. Bei JX, Su WH, Ng CC, et al. A GWAS Meta-analysis and Replication Study Identifies a Novel Locus within CLPTM1L/TERT Associated with Nasopharyngeal Carcinoma in Individuals of Chinese Ancestry. *Cancer Epidemiol Biomarkers Prev* 2016; **25**(1): 188-92.
29. Rafnar T, Sulem P, Stacey SN, et al. Sequence variants at the TERT-CLPTM1L locus associate with many cancer types. *Nat Genet* 2009; **41**(2): 221-7.
30. Chitnis N, Clark PM, Kamoun M, Stolle C, Brad Johnson F, Monos DS. An Expanded Role for HLA Genes: HLA-B Encodes a microRNA that Regulates IgA and Other Immune Response Transcripts. *Front Immunol* 2017; **8**: 583.
31. Bierl C, Karem K, Poon AC, et al. Correlates of cervical mucosal antibodies to human papillomavirus 16: results from a case control study. *Gynecol Oncol* 2005; **99**(3 Suppl 1): S262-8.
